# Supplementary material for: Genome-Wide Interrogation of Human Cancers Identifies EGLN1 Dependency in Clear Cell Ovarian Cancers
Source: Oxford University Press journal article supplement (doi:10.1158/0008-5472.can-18-2674), 2019-03-21
Supplement: 00085472can182674-sup-207712_2_supp_5368580_pnjfzs.xlsx [file 00085472can182674-sup-207712_2_supp_5368580_pnjfzs.xlsx]

## Sheet: S1 List of Constructs Used
Construct	Source
pLX_313-FireflyLuc2P	Promega
pLX_313-RenillaLuc	Laboratory stock
xPR_003	GPP, Broad Institute - xPR_003
sgEGLN1-1 GCAGCTACAAAATCAATGGC	designed in the laboratory
sgEGLN1-2 GCTGCTCATGAGCAGCCCAA	designed in the laboratory
sgEGLN1-3 TCCAGGTGATCTTATCGCCT	designed in the laboratory
sgEGLN1-4 GACTCGTCCAAGGACATCCG	designed in the laboratory
sgEGLN1-5 TCTCCTGGAACAGCGATGAG	designed in the laboratory
sgEGLN1-6 ACATAACCCGTTCCATTGCC	designed in the laboratory
sgEGLN1-7 GCCCGGATAACAAGCAACCA	designed in the laboratory
sgEGLN1-8 ATGCTGGTTGTACTTCATGA	designed in the laboratory
sgEGLN1-9 GTACTTCATGAGGGTTGCGA	designed in the laboratory
sgEGLN1-10 GTTGCTTTTGATTAGGTTAG	designed in the laboratory
sgEGLN1-11 TAAGTTGGTATGATATGGAG	designed in the laboratory
sgLacZ-1 AACGGCGGATTGACCGTAAT	GPP, Broad Institute, BRDN0000585417
sgChr2-1 GACATATAAGAGGTTCCCCG	designed in the laboratory
sgPolR1C-1 AAGAATCTCATCCTGAACAA	designed in the laboratory
sgPolR2D-1 AGAGACTGCTGAGGAGTCCA	designed in the laboratory
sgHIF1A-5 GATGGTAAGCCTCATCACAG	designed in the laboratory
sgHIF1A-6 CCTCACACGCAAATAGCTGA	designed in the laboratory
sgHIF1A-7 GATAATGTGAACAAATACAT	designed in the laboratory
sgHIF1A-8 CATTTCTCTCATTTCCTCA	designed in the laboratory
sgVHL1	Gift from laboratory of William Kaelin Jr
sgVHL2	Gift from laboratory of William Kaelin Jr
HIF1Amut	Gift from laboratory of William Kaelin Jr

## Sheet: S2 List of Six-Sigma Genes 
Gene dependency	six.sigma.count
BCL2L1	63
SMARCA4	59
PSMA4	49	FDA Approved	Oncology
ABCB7	47
PLK1	45
ATP6V1B2	41
ITGAV	38
PSMC2	38	FDA Approved	Oncology
PSMC5	34	FDA Approved	Oncology
TYMS	34
PSMA7	32	FDA Approved	Oncology
PIK3CA	29	FDA Approved	Oncology
MDM4	27	Advanced Pharma Development
CSNK1A1	26
CDK2	23	Advanced Pharma Development
BRAF	22	FDA Approved
PSMB5	22
TAF1	21
ATP5C1	20
GAK	19
WNK1	18
CFLAR	17
RANBP2	17
TUBG1	17
MTCH2	16
PSMA2	16	FDA Approved	Oncology
TFRC	13
PMPCB	12
PSMB1	12	FDA Approved	Oncology
PSMB6	12	FDA Approved	Oncology
SUPT16H	12
TRRAP	12
ATP1A1	11
COPS5	11
EP300	11		Oncology
MAPK1	11	FDA Approved	Oncology
PRKAR1A	11
MTOR	10	FDA Approved	Oncology
POLR2C	10
CDK13	9
CDK6	9	FDA Approved	Oncology
KDM1A	9
KRAS	9	Pre-clinical	Oncology
MAP3K8	9
QARS	9
SMARCA2	9
BUB1B	8
EEF2	8
PPIE	8
USP7	8	Advanced Pharma Development	Oncology
ATP5A1	7
HNRNPU	7
METAP2	7
SERPINH1	7
SLC39A7	7
TOP2A	7
EIF2AK4	6
EIF3F	6
HSPA8	6
LARS	6
MASTL	6
PLK4	6
TXN	6
USP5	6
ATR	5
CDK16	5
CHEK1	5
EPRS	5
LONP1	5
NRAS	5
TGM2	5
ATP2A2	4
EGFR	4	FDA Approved	Oncology
IGF1R	4
POLE	4
ABCE1	3
ATP5H	3
ATP6V0B	3
BUB1	3
CDK4	3	FDA Approved	Oncology
CLPP	3
JAK1	3
PDIA2	3
PIK3CB	3	FDA Approved	Oncology
PRKDC	3
PTK2	3
RRM2	3
SPCS2	3
TUBB	3
USP9X	3
AHCYL1	2
BACE2	2
CDC25C	2
CDK9	2
CSNK2B	2
CXCR4	2
DNASE1L2	2
EGLN1	2	Advanced Pharma Development	Non-Oncology
ERBB3	2	Advanced Pharma Development	Oncology
FLT3	2	FDA Approved	Oncology
GGCX	2
GPR37	2
GPX4	2
HSD17B10	2
KEAP1	2
MET	2	FDA Approved	Oncology
MORC3	2
PRMT5	2	Advanced Pharma Development	Oncology
PSMD7	2	FDA Approved	Oncology
PTPN23	2
VARS	2
ACACA	1
AKR1C2	1
ATP5J2	1
BCL2L2	1	Advanced Pharma Development	Oncology
BRD2	1
CAD	1
CDC25B	1
CDK1	1
CELSR1	1
EHMT1	1
EIF2AK1	1
ESR1	1	FDA Approved	Oncology
FGFR1	1	FDA Approved	Oncology
GAPDH	1
HDAC11	1
HDAC4	1
ITGB1	1
JAK2	1	FDA Approved	Oncology
KAT8	1
MAP4K4	1
MCL1	1	Advanced Pharma Development	Oncology
NFKB1	1
NT5E	1
PAK2	1
PI4KA	1
PPIL2	1
PSMB3	1
PTPN1	1
RARS	1
SLC25A1	1
SLC30A9	1
SLC33A1	1
SLC4A7	1
TLK2	1
TMX4	1
TRIM28	1
TTK	1
TUBB4B	1
USP18	1
YME1L1	1
ZMYND8	1

## Sheet: S3 CRISPR Associations
Gene	p.value	EffectSize	Type
VHL	1.41543e-24	0.556655	CRISPR Dependency
HIF1AN	1.11203e-14	0.212114	CRISPR Dependency
TAX1BP1	1.18165e-13	0.214975	CRISPR Dependency
ZNF577	4.27179e-13	-0.228205	CRISPR Dependency
SEC13	1.82047e-12	-0.214007	CRISPR Dependency
C19orf57	2.71633e-12	-0.185766	CRISPR Dependency
MIS12	2.81951e-12	-0.276122	CRISPR Dependency
SOX10	4.467e-12	0.329501	CRISPR Dependency
DALRD3	6.20762e-12	0.146034	CRISPR Dependency
VCPKMT	8.7371e-12	0.18325	CRISPR Dependency
DERL2	9.31194e-12	0.302883	CRISPR Dependency
AKAP13	9.8206e-12	0.16452	CRISPR Dependency
RPS3A	1.78155e-11	0.228435	CRISPR Dependency
OR13F1	2.15854e-11	-0.195092	CRISPR Dependency
POLR3F	2.41953e-11	-0.265308	CRISPR Dependency
TOR1AIP1	2.93957e-11	0.181561	CRISPR Dependency
TUBG1	2.97803e-11	-0.249789	CRISPR Dependency
COPS3	4.1572e-11	-0.25031	CRISPR Dependency
KRT13	4.93951e-11	-0.15478	CRISPR Dependency
CSE1L	6.62489e-11	-0.224378	CRISPR Dependency
RHBDL1	7.7156e-11	0.18277	CRISPR Dependency
RARS	1.01359e-10	-0.255583	CRISPR Dependency
NFATC2	1.22867e-10	0.160191	CRISPR Dependency
SRP68	1.32144e-10	-0.194777	CRISPR Dependency
UCHL3	1.52555e-10	0.151367	CRISPR Dependency
BRAF	1.93736e-10	0.332685	CRISPR Dependency
TMEM52	2.1948e-10	0.157106	CRISPR Dependency
EPM2AIP1	2.20723e-10	0.155869	CRISPR Dependency
YWHAB	2.21256e-10	0.165464	CRISPR Dependency
MAPK1	2.65435e-10	0.287944	CRISPR Dependency
RIPK3	2.68117e-10	-0.19359	CRISPR Dependency
BOLA2	3.51627e-10	0.246499	CRISPR Dependency
KANSL2	4.93587e-10	0.223222	CRISPR Dependency
C1orf86	5.02002e-10	0.17978	CRISPR Dependency
RMND5A	5.05937e-10	0.252795	CRISPR Dependency
NEDD8	5.97264e-10	-0.217567	CRISPR Dependency
USP38	6.15657e-10	0.173833	CRISPR Dependency
CCL16	7.03563e-10	-0.183061	CRISPR Dependency
ZNF330	7.39334e-10	0.139356	CRISPR Dependency
LAMTOR4	7.84584e-10	0.252656	CRISPR Dependency
GLRX3	8.11671e-10	0.283428	CRISPR Dependency
MEMO1	8.41847e-10	0.219663	CRISPR Dependency
GLP1R	1.11243e-09	-0.151336	CRISPR Dependency
BTG2	1.27562e-09	0.141802	CRISPR Dependency
CLMP	1.28656e-09	0.151838	CRISPR Dependency
FAF1	1.46844e-09	0.148268	CRISPR Dependency
CD302	1.66906e-09	0.141128	CRISPR Dependency
CTAGE5	1.67775e-09	-0.126574	CRISPR Dependency
FAU	2.06459e-09	0.266466	CRISPR Dependency
MITF	2.10782e-09	0.205994	CRISPR Dependency
CENPN	2.15817e-09	-0.223496	CRISPR Dependency
CHRNA2	2.21192e-09	-0.122563	CRISPR Dependency
POP7	2.26825e-09	0.299416	CRISPR Dependency
DPYD	2.36391e-09	0.15662	CRISPR Dependency
PDCD2L	2.64896e-09	0.177839	CRISPR Dependency
C7orf55	3.19416e-09	0.135489	CRISPR Dependency
G6PC3	3.38247e-09	0.10404	CRISPR Dependency
C2orf47	3.52122e-09	0.180272	CRISPR Dependency
TCEB2	3.99323e-09	0.248875	CRISPR Dependency
PPTC7	4.59322e-09	0.192921	CRISPR Dependency
ALG11	4.7276e-09	-0.217142	CRISPR Dependency
TMEM185B	4.99084e-09	0.146085	CRISPR Dependency
KIAA0100	5.13887e-09	0.203066	CRISPR Dependency
TXNL4B	5.88717e-09	-0.22011	CRISPR Dependency
AGBL4	6.42111e-09	-0.16422	CRISPR Dependency
BAZ1B	6.61705e-09	0.159943	CRISPR Dependency
MIEN1	6.64509e-09	0.177315	CRISPR Dependency
FANCF	7.52298e-09	0.242544	CRISPR Dependency
RPS8	7.53239e-09	0.203134	CRISPR Dependency
ZNF619	7.54458e-09	-0.151137	CRISPR Dependency
RTFDC1	8.31122e-09	-0.240297	CRISPR Dependency
MAD2L1	8.32824e-09	-0.250963	CRISPR Dependency
RBM34	8.36704e-09	0.185946	CRISPR Dependency
ARHGAP11B	8.96352e-09	0.173922	CRISPR Dependency
GJB3	9.34814e-09	0.119801	CRISPR Dependency
ZNF747	9.42423e-09	0.15364	CRISPR Dependency
HIST2H3D	9.53711e-09	0.236281	CRISPR Dependency
RPL12	9.83099e-09	0.277365	CRISPR Dependency
LCE1B	1.06029e-08	-0.217042	CRISPR Dependency
DISC1	1.08029e-08	0.118171	CRISPR Dependency
DUSP10	1.09386e-08	0.166729	CRISPR Dependency
CPQ	1.19215e-08	-0.151223	CRISPR Dependency
OR51I2	1.20715e-08	-0.163391	CRISPR Dependency
DSTYK	1.2112e-08	0.139239	CRISPR Dependency
ALG2	1.26338e-08	0.232452	CRISPR Dependency
CTF1	1.27418e-08	0.127123	CRISPR Dependency
SRSF2	1.27707e-08	0.197951	CRISPR Dependency
USP39	1.29109e-08	-0.19204	CRISPR Dependency
ZNF233	1.34776e-08	-0.148821	CRISPR Dependency
COL17A1	1.39464e-08	-0.135934	CRISPR Dependency
BOK	1.41457e-08	0.147558	CRISPR Dependency
IMPAD1	1.5348e-08	0.12377	CRISPR Dependency
RPS3	1.54143e-08	0.214947	CRISPR Dependency
SUN5	1.58832e-08	-0.174057	CRISPR Dependency
ZNF479	1.61712e-08	-0.215443	CRISPR Dependency
KIF4B	1.71221e-08	-0.125482	CRISPR Dependency
PNMA2	1.80233e-08	-0.124741	CRISPR Dependency
DLX5	1.84732e-08	0.159538	CRISPR Dependency
KSR2	1.87055e-08	-0.139676	CRISPR Dependency
SETX	1.95609e-08	0.153804	CRISPR Dependency
ISY1	1.96321e-08	-0.189965	CRISPR Dependency
TSPAN4	1.97204e-08	0.13123	CRISPR Dependency
PTPRR	1.991e-08	-0.125178	CRISPR Dependency
PSMB2	2.10304e-08	-0.17479	CRISPR Dependency
HMGN2	2.24466e-08	-0.159944	CRISPR Dependency
KRTAP2-2	2.39437e-08	0.109255	CRISPR Dependency
OR7A17	2.39677e-08	-0.16907	CRISPR Dependency
PPM1G	2.44049e-08	0.225829	CRISPR Dependency
HOXB9	2.51345e-08	0.153752	CRISPR Dependency
SMIM13	2.57132e-08	0.12749	CRISPR Dependency
ZPLD1	2.92525e-08	-0.100947	CRISPR Dependency
RSAD1	3.11211e-08	0.178999	CRISPR Dependency
RPL6	3.20887e-08	0.215763	CRISPR Dependency
DENND5A	3.32467e-08	0.120355	CRISPR Dependency
CCNL2	3.43251e-08	0.144042	CRISPR Dependency
CRH	3.47705e-08	0.131807	CRISPR Dependency
MTRNR2L1	3.51107e-08	-0.143572	CRISPR Dependency
LGALS3BP	3.54432e-08	0.138667	CRISPR Dependency
EHMT1	3.54469e-08	0.177204	CRISPR Dependency
STRN	3.59941e-08	0.118794	CRISPR Dependency
PES1	3.62479e-08	-0.211501	CRISPR Dependency
RPS11	3.62642e-08	0.173922	CRISPR Dependency
DLX6	3.79895e-08	0.141948	CRISPR Dependency
MFSD10	3.81177e-08	0.124756	CRISPR Dependency
SMIM22	4.05344e-08	0.105759	CRISPR Dependency
ANAPC10	4.05671e-08	-0.194087	CRISPR Dependency
WDR83OS	4.16205e-08	0.181593	CRISPR Dependency
WDR75	4.2146e-08	0.184249	CRISPR Dependency
AKIP1	4.36749e-08	0.130797	CRISPR Dependency
GAS1	4.40368e-08	0.140742	CRISPR Dependency
NDUFA5	4.41692e-08	0.201463	CRISPR Dependency
TK2	4.5752e-08	0.13007	CRISPR Dependency
ACPP	4.60346e-08	-0.114165	CRISPR Dependency
ASPG	4.62081e-08	0.12296	CRISPR Dependency
MYC	4.74818e-08	0.346843	CRISPR Dependency
SRP54	4.85688e-08	-0.206197	CRISPR Dependency
TBX2	5.06089e-08	0.155918	CRISPR Dependency
IQCK	5.17278e-08	0.107013	CRISPR Dependency
DEFB130	5.2072e-08	-0.104608	CRISPR Dependency
SLC35G6	5.34182e-08	-0.181286	CRISPR Dependency
KTI12	5.87891e-08	0.226084	CRISPR Dependency
SRRM1	6.10151e-08	-0.157176	CRISPR Dependency
ABCB6	6.11318e-08	0.126179	CRISPR Dependency
RPS20	6.30246e-08	0.199526	CRISPR Dependency
KRTAP4-7	6.55799e-08	0.154425	CRISPR Dependency
LRRC47	6.82996e-08	0.126889	CRISPR Dependency
DPM1	7.19529e-08	0.205472	CRISPR Dependency
TRIM32	7.37252e-08	0.0997105	CRISPR Dependency
PSMB6	7.59087e-08	0.375696	CRISPR Dependency
RPLP0	7.77021e-08	0.175752	CRISPR Dependency
FGF21	7.97632e-08	-0.118948	CRISPR Dependency
LRP12	8.05831e-08	0.129202	CRISPR Dependency
NUDT19	8.14682e-08	0.136874	CRISPR Dependency
GNB2L1	8.23617e-08	0.238656	CRISPR Dependency
CHMP4C	8.69753e-08	0.117065	CRISPR Dependency
OGDHL	8.79347e-08	-0.118846	CRISPR Dependency
POM121	9.03789e-08	-0.17071	CRISPR Dependency
C10orf91	9.1268e-08	-0.146736	CRISPR Dependency
CORO1A	9.15336e-08	0.132273	CRISPR Dependency
MGST2	9.19511e-08	0.100453	CRISPR Dependency
RPL23	9.33097e-08	0.20939	CRISPR Dependency
WDR43	9.50236e-08	0.16345	CRISPR Dependency
TMCO4	9.54536e-08	0.124601	CRISPR Dependency
CSDC2	9.7217e-08	-0.162634	CRISPR Dependency
GOSR2	9.748e-08	-0.165417	CRISPR Dependency
AP3S2	9.96318e-08	0.139824	CRISPR Dependency
BCKDHB	1.00741e-07	0.127378	CRISPR Dependency
AMY2B	1.01496e-07	0.0893697	CRISPR Dependency
SOCS3	1.01817e-07	0.268338	CRISPR Dependency
AUNIP	1.0373e-07	0.13621	CRISPR Dependency
METTL25	1.042e-07	0.15028	CRISPR Dependency
RAD51	1.05118e-07	-0.210436	CRISPR Dependency
SACM1L	1.05972e-07	-0.189986	CRISPR Dependency
DPPA3	1.06528e-07	-0.145383	CRISPR Dependency
MAML2	1.07554e-07	0.124506	CRISPR Dependency
GCFC2	1.07738e-07	0.143541	CRISPR Dependency
TMEM18	1.08801e-07	0.112481	CRISPR Dependency
ADPRHL2	1.10543e-07	0.133255	CRISPR Dependency
DSN1	1.1332e-07	-0.193519	CRISPR Dependency
ADAMTS1	1.17647e-07	0.13913	CRISPR Dependency
RGS2	1.22389e-07	0.137524	CRISPR Dependency
SFXN5	1.23754e-07	0.116159	CRISPR Dependency
HNRNPA0	1.26348e-07	0.158501	CRISPR Dependency
POLR3C	1.2816e-07	-0.141117	CRISPR Dependency
FAM84A	1.30009e-07	0.132316	CRISPR Dependency
SPDYE4	1.3049e-07	-0.174616	CRISPR Dependency
HIST2H2BF	1.30842e-07	0.187977	CRISPR Dependency
GJB6	1.31158e-07	-0.127412	CRISPR Dependency
TATDN3	1.3222e-07	0.142234	CRISPR Dependency
MRM1	1.33477e-07	0.131224	CRISPR Dependency
RRAGA	1.33937e-07	0.231024	CRISPR Dependency
SERPINA5	1.35318e-07	-0.140977	CRISPR Dependency
DIXDC1	1.39902e-07	-0.134388	CRISPR Dependency
PHF5A	1.40225e-07	-0.172717	CRISPR Dependency
RELT	1.50373e-07	0.117517	CRISPR Dependency
SIKE1	1.55241e-07	0.128516	CRISPR Dependency
TRMT61B	1.57784e-07	0.163156	CRISPR Dependency
RPA2	1.58247e-07	0.272712	CRISPR Dependency
MAPK3	1.59003e-07	0.138247	CRISPR Dependency
NCAPH	1.66473e-07	-0.142398	CRISPR Dependency
ANKRD65	1.71238e-07	0.112792	CRISPR Dependency
TTC30A	1.76195e-07	0.130135	CRISPR Dependency
ANKIB1	1.77827e-07	0.103203	CRISPR Dependency
LETMD1	1.79471e-07	0.127183	CRISPR Dependency
TCTEX1D2	1.83727e-07	0.114815	CRISPR Dependency
2019-03-09	1.88256e-07	0.147858	CRISPR Dependency
MED4	1.90417e-07	-0.21044	CRISPR Dependency
PRR15	2.02499e-07	0.123345	CRISPR Dependency
ZNF675	2.14501e-07	-0.131962	CRISPR Dependency
PHC1	2.15119e-07	0.151746	CRISPR Dependency
TAF6	2.16464e-07	0.171792	CRISPR Dependency
FOXC1	2.16916e-07	0.137425	CRISPR Dependency
ARID3A	2.19406e-07	-0.17825	CRISPR Dependency
CALU	2.23483e-07	0.113889	CRISPR Dependency
CCDC117	2.2806e-07	0.133596	CRISPR Dependency
ARV1	2.2807e-07	0.155694	CRISPR Dependency
CAMSAP2	2.28499e-07	0.15828	CRISPR Dependency
LEPREL4	2.29675e-07	0.142514	CRISPR Dependency
GALNT18	2.3045e-07	-0.11026	CRISPR Dependency
HDDC2	2.38799e-07	0.102973	CRISPR Dependency
HSPA6	2.45201e-07	0.16011	CRISPR Dependency
UPF1	2.45732e-07	-0.172807	CRISPR Dependency
PRKAR2A	2.52058e-07	0.141444	CRISPR Dependency
NCOA4	2.59103e-07	0.199157	CRISPR Dependency
LEPRE1	2.60561e-07	0.136646	CRISPR Dependency
FAM151B	2.6094e-07	-0.0932217	CRISPR Dependency
CYBA	2.6164e-07	0.113217	CRISPR Dependency
ZDHHC17	2.63685e-07	0.138565	CRISPR Dependency
AMPD3	2.66142e-07	0.111324	CRISPR Dependency
RPS6KA5	2.69654e-07	0.0993459	CRISPR Dependency
TWIST1	2.7977e-07	0.158047	CRISPR Dependency
LSM14B	2.80126e-07	0.114659	CRISPR Dependency
RBM14	2.86894e-07	-0.230012	CRISPR Dependency
PVRIG	2.98293e-07	0.134097	CRISPR Dependency
COPS4	3.00005e-07	-0.183029	CRISPR Dependency
LSM6	3.06058e-07	-0.188608	CRISPR Dependency
LAMTOR2	3.1307e-07	0.199634	CRISPR Dependency
TXNL1	3.13307e-07	0.142374	CRISPR Dependency
RPSA	3.1444e-07	0.184038	CRISPR Dependency
KRTAP5-3	3.21944e-07	-0.15901	CRISPR Dependency
CYFIP1	3.30859e-07	-0.162044	CRISPR Dependency
SLC39A1	3.32936e-07	0.155347	CRISPR Dependency
CTBS	3.39578e-07	0.110574	CRISPR Dependency
LHFP	3.50812e-07	0.111416	CRISPR Dependency
RARRES2	3.53451e-07	-0.155862	CRISPR Dependency
FAHD2A	3.57088e-07	0.139581	CRISPR Dependency
GTF2H5	3.59313e-07	0.156328	CRISPR Dependency
RPL13	3.63832e-07	0.135486	CRISPR Dependency
IFIH1	3.64407e-07	0.112725	CRISPR Dependency
NACA	3.71245e-07	0.163109	CRISPR Dependency
MRFAP1L1	3.77247e-07	0.12702	CRISPR Dependency
ARHGAP11A	3.78234e-07	0.151528	CRISPR Dependency
FZD1	3.82712e-07	0.118897	CRISPR Dependency
PPIL2	3.99313e-07	-0.163972	CRISPR Dependency
FAM104A	4.06383e-07	0.117947	CRISPR Dependency
TWISTNB	4.10259e-07	0.196149	CRISPR Dependency
SF3B6	4.21612e-07	-0.181037	CRISPR Dependency
ARL6IP1	4.2174e-07	0.105808	CRISPR Dependency
ZFC3H1	4.36458e-07	0.198483	CRISPR Dependency
TRAPPC5	4.51725e-07	-0.156542	CRISPR Dependency
LAPTM4A	4.63849e-07	0.116624	CRISPR Dependency
MDM1	4.67534e-07	0.120224	CRISPR Dependency
GK5	4.77801e-07	0.120502	CRISPR Dependency
TCP11	4.83045e-07	-0.105358	CRISPR Dependency
TSPAN1	4.87177e-07	0.125202	CRISPR Dependency
PPIE	4.96772e-07	-0.182189	CRISPR Dependency
SMR3A	5.1716e-07	-0.196633	CRISPR Dependency
CBLN3	5.27222e-07	-0.14669	CRISPR Dependency
COMMD2	5.32942e-07	0.128477	CRISPR Dependency
WBP1L	5.48752e-07	-0.189508	CRISPR Dependency
ERVV-2	5.68037e-07	0.0944476	CRISPR Dependency
ATPIF1	5.69365e-07	0.113065	CRISPR Dependency
CYP1A2	5.73341e-07	-0.116804	CRISPR Dependency
NANOG	5.81128e-07	-0.14017	CRISPR Dependency
ID4	5.83253e-07	0.117287	CRISPR Dependency
FOXD4L5	6.19126e-07	-0.112158	CRISPR Dependency
PPP2R4	6.22612e-07	0.209042	CRISPR Dependency
AOC1	6.31019e-07	-0.108684	CRISPR Dependency
KLF16	6.40022e-07	0.16003	CRISPR Dependency
HOXC11	6.40276e-07	0.129204	CRISPR Dependency
KCNMA1	6.41609e-07	0.105931	CRISPR Dependency
CHD1	6.41848e-07	0.167463	CRISPR Dependency
SPAG4	6.46293e-07	0.136594	CRISPR Dependency
RHOQ	6.5597e-07	0.16409	CRISPR Dependency
RPL4	6.56279e-07	0.195627	CRISPR Dependency
HIST3H2BB	6.72488e-07	0.141319	CRISPR Dependency
DGCR14	6.76898e-07	-0.171413	CRISPR Dependency
MED30	6.81831e-07	0.239463	CRISPR Dependency
TXNDC17	6.94763e-07	0.163269	CRISPR Dependency
GLIPR1L2	7.20736e-07	0.109835	CRISPR Dependency
GBA	7.21842e-07	0.111171	CRISPR Dependency
RAPGEF6	7.23776e-07	0.126292	CRISPR Dependency
AMBRA1	7.35138e-07	-0.330661	CRISPR Dependency
CCDC59	7.35583e-07	0.153333	CRISPR Dependency
TTLL3	7.3809e-07	0.110572	CRISPR Dependency
PDGFA	7.50051e-07	0.102071	CRISPR Dependency
FEM1B	7.51226e-07	0.131515	CRISPR Dependency
LDHC	7.64121e-07	-0.110791	CRISPR Dependency
CAST	7.66325e-07	0.124697	CRISPR Dependency
PLRG1	7.76471e-07	-0.141418	CRISPR Dependency
UBA3	7.82971e-07	-0.183464	CRISPR Dependency
RPL22	7.86798e-07	-0.157082	CRISPR Dependency
CYR61	7.99306e-07	0.102452	CRISPR Dependency
SPATA31A7	8.03291e-07	-0.154219	CRISPR Dependency
PSMA4	8.09302e-07	-0.169847	CRISPR Dependency
C19orf24	8.15597e-07	0.133809	CRISPR Dependency
RNF138	8.21466e-07	0.131586	CRISPR Dependency
PGA3	8.34519e-07	0.15089	CRISPR Dependency
CGB2	8.39055e-07	0.130435	CRISPR Dependency
MOB3C	8.43556e-07	0.11173	CRISPR Dependency
PCDHGA8	8.44957e-07	0.104238	CRISPR Dependency
BLID	8.47448e-07	0.108246	CRISPR Dependency
GEMIN5	8.53531e-07	0.190075	CRISPR Dependency
ELMO2	8.79797e-07	0.22751	CRISPR Dependency
CCNE1	8.83393e-07	0.201272	CRISPR Dependency
TSNAX	8.96514e-07	0.110082	CRISPR Dependency
TMED4	9.01642e-07	0.115123	CRISPR Dependency
CAV2	9.09526e-07	0.129699	CRISPR Dependency
TRAPPC3	9.45585e-07	-0.163475	CRISPR Dependency
SNRNP35	9.46686e-07	-0.168521	CRISPR Dependency
DPM3	9.51615e-07	0.162177	CRISPR Dependency
C6orf120	9.52577e-07	0.103269	CRISPR Dependency
CIB4	9.59282e-07	-0.119734	CRISPR Dependency
C20orf196	9.92681e-07	-0.145332	CRISPR Dependency
CHPT1	1.00143e-06	0.103029	CRISPR Dependency
ENDOV	1.00308e-06	0.112796	CRISPR Dependency
DPAGT1	1.00349e-06	0.257801	CRISPR Dependency
TYW3	1.01024e-06	0.112744	CRISPR Dependency
C11orf91	1.01117e-06	0.127953	CRISPR Dependency
ZIC2	1.01962e-06	0.133663	CRISPR Dependency
TNKS	1.02225e-06	0.123815	CRISPR Dependency
KRTAP5-5	1.02526e-06	0.102567	CRISPR Dependency
CRIM1	1.03008e-06	0.111592	CRISPR Dependency
ZNF490	1.03867e-06	-0.102353	CRISPR Dependency
ANGEL2	1.04004e-06	0.0917048	CRISPR Dependency
STMN3	1.04405e-06	0.109947	CRISPR Dependency
VN1R4	1.05349e-06	-0.113519	CRISPR Dependency
PDF	1.06211e-06	0.114193	CRISPR Dependency
ZNF253	1.07318e-06	-0.133575	CRISPR Dependency
OR7G1	1.07657e-06	-0.119135	CRISPR Dependency
SOGA1	1.08244e-06	0.102026	CRISPR Dependency
LRRC32	1.08473e-06	-0.139729	CRISPR Dependency
SIAH3	1.08878e-06	-0.103267	CRISPR Dependency
HIST1H1A	1.09796e-06	0.10824	CRISPR Dependency
PPP1R21	1.09968e-06	0.120327	CRISPR Dependency
VAPB	1.10167e-06	0.121561	CRISPR Dependency
IRAK1BP1	1.13616e-06	0.131549	CRISPR Dependency
ELL3	1.14179e-06	0.133613	CRISPR Dependency
UHMK1	1.16509e-06	0.114819	CRISPR Dependency
PRKAB2	1.17649e-06	0.118862	CRISPR Dependency
WISP2	1.18588e-06	0.107101	CRISPR Dependency
ASZ1	1.21142e-06	0.119933	CRISPR Dependency
CEP76	1.21321e-06	0.111418	CRISPR Dependency
CLDN1	1.22178e-06	0.104348	CRISPR Dependency
GLE1	1.22663e-06	0.170458	CRISPR Dependency
DHFRL1	1.29979e-06	-0.156292	CRISPR Dependency
SLC25A22	1.31066e-06	0.151359	CRISPR Dependency
C17orf58	1.32864e-06	0.163395	CRISPR Dependency
HOXA5	1.33016e-06	0.131099	CRISPR Dependency
XRCC6BP1	1.33464e-06	0.139281	CRISPR Dependency
FXYD7	1.33982e-06	-0.115919	CRISPR Dependency
HSPE1	1.34292e-06	0.23599	CRISPR Dependency
DCTN1	1.34941e-06	-0.131089	CRISPR Dependency
TM4SF4	1.36458e-06	0.111137	CRISPR Dependency
SMIM19	1.38024e-06	-0.0946512	CRISPR Dependency
SLC48A1	1.40378e-06	0.110729	CRISPR Dependency
GLIPR1	1.42716e-06	0.102253	CRISPR Dependency
BUD13	1.42767e-06	0.216781	CRISPR Dependency
FERMT2	1.45102e-06	0.32288	CRISPR Dependency
METTL12	1.49563e-06	0.123225	CRISPR Dependency
ECD	1.50679e-06	-0.17871	CRISPR Dependency
ITPKC	1.51366e-06	0.128755	CRISPR Dependency
ZNF511	1.51629e-06	0.162754	CRISPR Dependency
NGDN	1.52415e-06	-0.218435	CRISPR Dependency
CHST12	1.52425e-06	0.11319	CRISPR Dependency
UBE2V1	1.53222e-06	-0.157668	CRISPR Dependency
CSH2	1.54157e-06	0.148604	CRISPR Dependency
IFNA2	1.5439e-06	-0.110935	CRISPR Dependency
C14orf142	1.56488e-06	0.11241	CRISPR Dependency
SIX4	1.59689e-06	0.127466	CRISPR Dependency
BAI1	1.60917e-06	0.12209	CRISPR Dependency
DNAJB9	1.63782e-06	0.113391	CRISPR Dependency
NCLN	1.65309e-06	0.137855	CRISPR Dependency
ALK	1.66778e-06	0.126218	CRISPR Dependency
ABHD16B	1.69437e-06	0.104916	CRISPR Dependency
RIPK2	1.6959e-06	0.108421	CRISPR Dependency
LSM10	1.70181e-06	-0.199626	CRISPR Dependency
ADPGK	1.71614e-06	0.133741	CRISPR Dependency
CDC14A	1.75697e-06	0.102548	CRISPR Dependency
PML	1.76362e-06	-0.128726	CRISPR Dependency
PGAM5	1.7874e-06	0.122246	CRISPR Dependency
CTSD	1.79289e-06	0.111701	CRISPR Dependency
SHB	1.80285e-06	0.117412	CRISPR Dependency
KRT81	1.80859e-06	0.115079	CRISPR Dependency
CEBPA	1.813e-06	-0.159875	CRISPR Dependency
CWC22	1.81333e-06	-0.171225	CRISPR Dependency
DISP1	1.82229e-06	0.0845939	CRISPR Dependency
C8A	1.82263e-06	-0.0928461	CRISPR Dependency
POLM	1.84026e-06	0.11649	CRISPR Dependency
GINS4	1.85785e-06	-0.166342	CRISPR Dependency
RGPD4	1.8592e-06	-0.160509	CRISPR Dependency
TAPBP	1.86052e-06	0.0957686	CRISPR Dependency
GRHPR	1.88951e-06	0.110377	CRISPR Dependency
XRCC1	1.91136e-06	0.152818	CRISPR Dependency
POLR2J	1.95444e-06	0.246543	CRISPR Dependency
CDKN2AIPNL	1.97919e-06	0.155823	CRISPR Dependency
TBC1D5	1.98751e-06	0.121275	CRISPR Dependency
BAG4	2.00034e-06	-0.130446	CRISPR Dependency
LY6E	2.03496e-06	0.0994223	CRISPR Dependency
PDIA4	2.05438e-06	0.121177	CRISPR Dependency
DUPD1	2.05954e-06	-0.0868385	CRISPR Dependency
KCTD12	2.0787e-06	0.105029	CRISPR Dependency
NUDT15	2.08162e-06	0.10196	CRISPR Dependency
FOPNL	2.12619e-06	0.10445	CRISPR Dependency
LFNG	2.13053e-06	0.109276	CRISPR Dependency
LIF	2.14459e-06	0.114566	CRISPR Dependency
RPL9	2.16545e-06	0.20828	CRISPR Dependency
RILPL1	2.16878e-06	0.0957666	CRISPR Dependency
HBZ	2.19043e-06	0.0999738	CRISPR Dependency
RPL21	2.19177e-06	-0.207533	CRISPR Dependency
ZNF558	2.19694e-06	-0.112082	CRISPR Dependency
TNRC6A	2.20595e-06	0.12515	CRISPR Dependency
SAMD11	2.24153e-06	0.108212	CRISPR Dependency
SPDYE1	2.27481e-06	-0.174995	CRISPR Dependency
ANXA2	2.34737e-06	0.0970856	CRISPR Dependency
AGR2	2.35718e-06	0.0962684	CRISPR Dependency
IGFBP3	2.36689e-06	0.141743	CRISPR Dependency
EPB41L2	2.36697e-06	-0.122017	CRISPR Dependency
RIMKLA	2.37513e-06	0.12026	CRISPR Dependency
PKIG	2.39948e-06	0.0925348	CRISPR Dependency
LCE4A	2.40379e-06	-0.135801	CRISPR Dependency
MCEMP1	2.40868e-06	-0.122227	CRISPR Dependency
PPP1R14D	2.42338e-06	-0.104408	CRISPR Dependency
HOXA1	2.43097e-06	0.108111	CRISPR Dependency
CBWD3	2.47691e-06	0.115659	CRISPR Dependency
C17orf50	2.48102e-06	0.137559	CRISPR Dependency
KRTAP5-6	2.48224e-06	0.10164	CRISPR Dependency
IQCC	2.49449e-06	0.123326	CRISPR Dependency
DVL1	2.51127e-06	0.110409	CRISPR Dependency
IGFBPL1	2.51736e-06	0.10654	CRISPR Dependency
SLC19A3	2.52416e-06	0.130952	CRISPR Dependency
PNISR	2.55662e-06	-0.14566	CRISPR Dependency
EXO1	2.56669e-06	0.148237	CRISPR Dependency
PRELID1	2.57126e-06	0.15261	CRISPR Dependency
RBM38	2.57871e-06	0.145195	CRISPR Dependency
CBX2	2.6118e-06	0.10664	CRISPR Dependency
TOR1AIP2	2.62077e-06	0.124542	CRISPR Dependency
ARHGEF12	2.63495e-06	0.124257	CRISPR Dependency
TNNT3	2.6388e-06	-0.122537	CRISPR Dependency
GTF2F1	2.66742e-06	-0.130887	CRISPR Dependency
TGM3	2.68964e-06	-0.108213	CRISPR Dependency
MTDH	2.72413e-06	0.115759	CRISPR Dependency
PHF13	2.74388e-06	0.116261	CRISPR Dependency
SCGB3A1	2.75532e-06	0.118272	CRISPR Dependency
NXNL2	2.77368e-06	0.11496	CRISPR Dependency
SMR3B	2.77403e-06	-0.125775	CRISPR Dependency
DNAAF2	2.78994e-06	0.11766	CRISPR Dependency
HIST1H2AA	2.80825e-06	-0.107467	CRISPR Dependency
TMEM106A	2.81445e-06	0.113342	CRISPR Dependency
RAPGEF2	2.86591e-06	0.112637	CRISPR Dependency
NDUFA12	2.88844e-06	0.102774	CRISPR Dependency
BUB3	2.9348e-06	0.255151	CRISPR Dependency
ZKSCAN2	2.97425e-06	-0.101876	CRISPR Dependency
ZNF622	3.02576e-06	0.165434	CRISPR Dependency
L2HGDH	3.02975e-06	0.0991863	CRISPR Dependency
DGCR6	3.06882e-06	0.122667	CRISPR Dependency
ETHE1	3.08613e-06	0.101448	CRISPR Dependency
IVD	3.09714e-06	-0.122794	CRISPR Dependency
GOLGA8N	3.1019e-06	-0.117572	CRISPR Dependency
HOXA10	3.11857e-06	0.124824	CRISPR Dependency
FAM122A	3.15922e-06	0.190628	CRISPR Dependency
RSPH3	3.17949e-06	0.101751	CRISPR Dependency
C16orf13	3.19349e-06	0.0984197	CRISPR Dependency
PRR21	3.23794e-06	0.099319	CRISPR Dependency
OPRL1	3.29268e-06	0.10559	CRISPR Dependency
C14orf180	3.36459e-06	-0.114482	CRISPR Dependency
CNN2	3.38909e-06	-0.125277	CRISPR Dependency
SETD5	3.40602e-06	0.162676	CRISPR Dependency
ELOVL4	3.41123e-06	0.0902855	CRISPR Dependency
SYS1	3.50792e-06	0.255587	CRISPR Dependency
SFRP4	3.51812e-06	0.105414	CRISPR Dependency
PIGW	3.53055e-06	0.120413	CRISPR Dependency
LRRC10B	3.55373e-06	0.124338	CRISPR Dependency
DLX1	3.56786e-06	0.100849	CRISPR Dependency
CXCR2	3.5986e-06	-0.0884606	CRISPR Dependency
SFRP2	3.59957e-06	0.110283	CRISPR Dependency
PRKAR2B	3.60415e-06	0.0927213	CRISPR Dependency
ISCU	3.62339e-06	-0.160102	CRISPR Dependency
KLHDC9	3.62977e-06	0.101025	CRISPR Dependency
GGH	3.63983e-06	0.082057	CRISPR Dependency
KLLN	3.68663e-06	0.123231	CRISPR Dependency
LRCH3	3.6897e-06	0.117667	CRISPR Dependency
CDKN1A	3.70168e-06	-0.240703	CRISPR Dependency
GAN	3.70678e-06	0.11662	CRISPR Dependency
TAS2R60	3.71118e-06	-0.0968159	CRISPR Dependency
SIGMAR1	3.86913e-06	0.125466	CRISPR Dependency
FKBP6	3.90717e-06	0.15511	CRISPR Dependency
POTEM	3.93191e-06	-0.125226	CRISPR Dependency
ZNF879	3.94583e-06	-0.085609	CRISPR Dependency
CYP2C18	3.95095e-06	-0.0997368	CRISPR Dependency
ZFAND5	4.04374e-06	0.134819	CRISPR Dependency
CRTAP	4.0762e-06	0.103907	CRISPR Dependency
STX10	4.09533e-06	0.125739	CRISPR Dependency
SUDS3	4.09946e-06	0.153804	CRISPR Dependency
HS1BP3	4.10643e-06	0.106688	CRISPR Dependency
CDCA8	4.19287e-06	0.19953	CRISPR Dependency
B3GNT1	4.19819e-06	0.104427	CRISPR Dependency
TRHDE	4.19957e-06	0.106964	CRISPR Dependency
HAP1	4.21835e-06	0.116276	CRISPR Dependency
SLC38A2	4.21975e-06	0.167457	CRISPR Dependency
LSM4	4.25296e-06	-0.157682	CRISPR Dependency
OCM2	4.28962e-06	-0.111259	CRISPR Dependency
IFRD1	4.2913e-06	0.0937415	CRISPR Dependency
INHBA	4.30026e-06	0.094874	CRISPR Dependency
C5orf15	4.30068e-06	0.107097	CRISPR Dependency
ZNF728	4.30398e-06	-0.173176	CRISPR Dependency
ANKRD40	4.31849e-06	0.116649	CRISPR Dependency
IFRD2	4.33008e-06	0.114053	CRISPR Dependency
CCNK	4.3716e-06	-0.168245	CRISPR Dependency
PSD2	4.3847e-06	-0.0907973	CRISPR Dependency
ARL4D	4.42984e-06	0.143809	CRISPR Dependency
PARD6G	4.44462e-06	0.12169	CRISPR Dependency
TBC1D3C	4.46387e-06	0.263858	CRISPR Dependency
DCTPP1	4.46423e-06	0.104252	CRISPR Dependency
YY1AP1	4.47924e-06	0.0988264	CRISPR Dependency
LRRC8E	4.55736e-06	0.11968	CRISPR Dependency
USP33	4.57575e-06	0.106908	CRISPR Dependency
CHURC1	4.59715e-06	0.106675	CRISPR Dependency
NARS	4.63201e-06	-0.169098	CRISPR Dependency
SERINC3	4.66173e-06	0.118697	CRISPR Dependency
ZNF419	4.69243e-06	0.0985632	CRISPR Dependency
SH3BP5L	4.74057e-06	0.105083	CRISPR Dependency
PVRL1	4.75953e-06	-0.110546	CRISPR Dependency
CCDC74A	4.79351e-06	0.121022	CRISPR Dependency
SLC22A9	4.80207e-06	-0.0987324	CRISPR Dependency
QDPR	4.85166e-06	0.0988737	CRISPR Dependency
MFSD1	4.87196e-06	0.107459	CRISPR Dependency
LRRCC1	4.88448e-06	0.0877013	CRISPR Dependency
MTURN	4.92402e-06	0.119186	CRISPR Dependency
ATP5A1	4.929e-06	-0.184852	CRISPR Dependency
OR11H6	4.94402e-06	-0.102864	CRISPR Dependency
OR4S1	5.0589e-06	-0.137074	CRISPR Dependency
SLC16A4	5.14227e-06	0.0939189	CRISPR Dependency
FAM109B	5.18906e-06	-0.119364	CRISPR Dependency
MORN1	5.22903e-06	0.102995	CRISPR Dependency
APEX1	5.23816e-06	0.109043	CRISPR Dependency
CTAGE1	5.26419e-06	-0.127317	CRISPR Dependency
DOCK7	5.42713e-06	0.140399	CRISPR Dependency
TMEM154	5.45311e-06	0.107511	CRISPR Dependency
RPL37	5.46681e-06	0.243596	CRISPR Dependency
CA8	5.53961e-06	0.0935876	CRISPR Dependency
UTF1	5.61757e-06	0.12717	CRISPR Dependency
MAX	5.64893e-06	0.172076	CRISPR Dependency
ABCC3	5.66621e-06	-0.113957	CRISPR Dependency
HOXA11	5.69483e-06	0.139635	CRISPR Dependency
ZNF230	5.75058e-06	-0.108274	CRISPR Dependency
TTK	5.81079e-06	-0.17559	CRISPR Dependency
SNX32	5.82494e-06	0.123489	CRISPR Dependency
LATS2	5.83871e-06	-0.158683	CRISPR Dependency
GSTK1	5.92075e-06	0.0988876	CRISPR Dependency
RGPD6	5.97049e-06	0.177299	CRISPR Dependency
CREB3L1	6.05774e-06	-0.0923299	CRISPR Dependency
WDSUB1	6.16249e-06	0.108148	CRISPR Dependency
GSTO1	6.17281e-06	0.104736	CRISPR Dependency
KIDINS220	6.21621e-06	0.163719	CRISPR Dependency
SAMD15	6.27496e-06	0.117338	CRISPR Dependency
ANKRD36	6.38709e-06	0.131567	CRISPR Dependency
TLX1NB	6.42397e-06	-0.12134	CRISPR Dependency
FOXD3	6.45829e-06	0.115366	CRISPR Dependency
KIAA0586	6.45865e-06	0.115959	CRISPR Dependency
CENPL	6.5206e-06	-0.149485	CRISPR Dependency
RNFT2	6.57877e-06	-0.113007	CRISPR Dependency
ELP5	6.58614e-06	0.180793	CRISPR Dependency
CEL	6.62356e-06	0.0993766	CRISPR Dependency
ZNF593	6.62979e-06	0.136843	CRISPR Dependency
OR13C4	6.66753e-06	-0.0915856	CRISPR Dependency
HNRNPUL2	6.70156e-06	0.137395	CRISPR Dependency
WASF3	6.72183e-06	0.0904572	CRISPR Dependency
C1QTNF3	6.72689e-06	-0.118801	CRISPR Dependency
SEMG2	6.77214e-06	-0.116911	CRISPR Dependency
EVI2A	6.86016e-06	0.102368	CRISPR Dependency
NAIP	6.86501e-06	0.158732	CRISPR Dependency
LUC7L3	6.95398e-06	0.135494	CRISPR Dependency
PDYN	6.97934e-06	-0.0971409	CRISPR Dependency
PTCH2	7.00111e-06	0.104708	CRISPR Dependency
RASL10A	7.16285e-06	0.12018	CRISPR Dependency
SLFNL1	7.2866e-06	0.114282	CRISPR Dependency
PREB	7.28661e-06	-0.147418	CRISPR Dependency
JRKL	7.37537e-06	0.0967559	CRISPR Dependency
HES3	7.38793e-06	0.125023	CRISPR Dependency
HOXC10	7.39577e-06	0.153439	CRISPR Dependency
CALML6	7.41445e-06	0.102427	CRISPR Dependency
LY6G5C	7.46469e-06	0.104373	CRISPR Dependency
RIMBP3B	7.5137e-06	0.125423	CRISPR Dependency
PSMG1	7.52694e-06	0.259995	CRISPR Dependency
GXYLT1	7.71761e-06	0.0997046	CRISPR Dependency
PMPCB	7.86844e-06	0.170768	CRISPR Dependency
PRLHR	7.88665e-06	-0.122992	CRISPR Dependency
PDHX	7.93708e-06	0.115755	CRISPR Dependency
SLC9B1	7.93883e-06	-0.111743	CRISPR Dependency
PARP12	7.95409e-06	0.0890985	CRISPR Dependency
TRABD	7.97296e-06	-0.122835	CRISPR Dependency
PIGM	8.02309e-06	0.117939	CRISPR Dependency
TNFRSF12A	8.19038e-06	0.124639	CRISPR Dependency
CLP1	8.2687e-06	-0.139648	CRISPR Dependency
PLA2R1	8.37422e-06	0.0836968	CRISPR Dependency
CAMK1G	8.40013e-06	-0.109524	CRISPR Dependency
DNAH10	8.45857e-06	0.107209	CRISPR Dependency
NUPL2	8.49001e-06	0.158934	CRISPR Dependency
AKAP2	8.49858e-06	-0.103755	CRISPR Dependency
ANK1	8.50856e-06	-0.101802	CRISPR Dependency
NAA20	8.52801e-06	-0.171038	CRISPR Dependency
RFC4	8.58165e-06	-0.148905	CRISPR Dependency
NCK2	8.62713e-06	0.0875459	CRISPR Dependency
LIN52	8.69327e-06	-0.131283	CRISPR Dependency
HACE1	8.71737e-06	0.101136	CRISPR Dependency
ABHD11	8.73818e-06	0.190623	CRISPR Dependency
WDR70	8.76715e-06	-0.150488	CRISPR Dependency
RAB21	8.7828e-06	0.133451	CRISPR Dependency
ARL4C	8.81085e-06	0.103779	CRISPR Dependency
GPR155	8.83901e-06	-0.100531	CRISPR Dependency
CISD2	8.84497e-06	0.0871523	CRISPR Dependency
NUP133	8.90481e-06	-0.132737	CRISPR Dependency
SMIM1	8.93181e-06	0.0970436	CRISPR Dependency
C1QTNF6	8.97404e-06	-0.0974827	CRISPR Dependency
FOXB2	9.06761e-06	-0.108022	CRISPR Dependency
SPIDR	9.24935e-06	0.0967813	CRISPR Dependency
YWHAG	9.27489e-06	0.121709	CRISPR Dependency
RPS19	9.28368e-06	0.13608	CRISPR Dependency
SOAT1	9.28771e-06	0.100827	CRISPR Dependency
DBT	9.31294e-06	0.0887543	CRISPR Dependency
PTN	9.34712e-06	-0.111251	CRISPR Dependency
OSBPL8	9.36769e-06	0.0939947	CRISPR Dependency
SPOCK3	9.36771e-06	0.0848711	CRISPR Dependency
AQP10	9.5112e-06	0.134182	CRISPR Dependency
FIGNL1	9.56891e-06	0.136529	CRISPR Dependency
LAMTOR5	9.6602e-06	0.0934122	CRISPR Dependency
CTU2	9.67643e-06	0.186776	CRISPR Dependency
OCLN	9.70243e-06	0.120706	CRISPR Dependency
ACD	9.71004e-06	0.155742	CRISPR Dependency
KCNQ2	9.76409e-06	0.10086	CRISPR Dependency
PSMC4	9.81304e-06	-0.150022	CRISPR Dependency
PNKD	9.85043e-06	0.113919	CRISPR Dependency
LXN	9.88241e-06	0.0956486	CRISPR Dependency
SLC19A1	9.90841e-06	0.111402	CRISPR Dependency
PRR23D2	9.93497e-06	-0.115708	CRISPR Dependency
RANGAP1	9.9935e-06	-0.160658	CRISPR Dependency
C22orf23	1.0192e-05	0.109254	CRISPR Dependency
UBXN7	1.02113e-05	0.108724	CRISPR Dependency
SMG8	1.0217e-05	0.139414	CRISPR Dependency
TPRG1L	1.02945e-05	0.112674	CRISPR Dependency
RRP12	1.03142e-05	-0.136212	CRISPR Dependency
CDK9	1.03295e-05	-0.130288	CRISPR Dependency
SMPD3	1.03317e-05	-0.140248	CRISPR Dependency
AGTRAP	1.04034e-05	0.0862207	CRISPR Dependency
PMP22	1.0464e-05	0.112075	CRISPR Dependency
NKAIN3	1.04867e-05	0.0906724	CRISPR Dependency
CCDC174	1.04943e-05	-0.13287	CRISPR Dependency
SLC25A33	1.05675e-05	0.103601	CRISPR Dependency
KCNK12	1.0571e-05	0.130432	CRISPR Dependency
CHCHD2	1.05894e-05	0.14838	CRISPR Dependency
SCARF1	1.05896e-05	0.109209	CRISPR Dependency
STK17A	1.05978e-05	0.108784	CRISPR Dependency
ALKBH1	1.06945e-05	-0.122752	CRISPR Dependency
PILRA	1.07409e-05	0.11188	CRISPR Dependency
MYEOV	1.07457e-05	0.107139	CRISPR Dependency
KBTBD6	1.07673e-05	0.109722	CRISPR Dependency
METTL16	1.08711e-05	-0.197307	CRISPR Dependency
B4GALNT1	1.1026e-05	0.103651	CRISPR Dependency
AHCTF1	1.12543e-05	-0.126819	CRISPR Dependency
GABRR2	1.13146e-05	0.0979014	CRISPR Dependency
MLYCD	1.1389e-05	0.0918169	CRISPR Dependency
TADA2A	1.13964e-05	0.147062	CRISPR Dependency
RAD54L	1.14017e-05	0.120851	CRISPR Dependency
ZFPM1	1.14126e-05	0.109821	CRISPR Dependency
SFT2D3	1.14376e-05	0.105525	CRISPR Dependency
LCE1F	1.14495e-05	-0.153769	CRISPR Dependency
CREB3	1.15037e-05	0.106569	CRISPR Dependency
KDELR2	1.15531e-05	0.114331	CRISPR Dependency
PARD3B	1.16293e-05	0.0897117	CRISPR Dependency
EMP2	1.16834e-05	-0.128252	CRISPR Dependency
UNC13C	1.17239e-05	-0.104368	CRISPR Dependency
ADAMTS8	1.18303e-05	0.0837549	CRISPR Dependency
HOXD13	1.18551e-05	0.125032	CRISPR Dependency
OR4D9	1.18874e-05	-0.110156	CRISPR Dependency
DCDC2B	1.19075e-05	0.105639	CRISPR Dependency
DHRS7	1.19415e-05	0.0922327	CRISPR Dependency
HCRTR1	1.19503e-05	-0.1209	CRISPR Dependency
UBE2I	1.20171e-05	-0.164677	CRISPR Dependency
SPDYE3	1.20453e-05	-0.149078	CRISPR Dependency
ZNF750	1.21035e-05	0.0938324	CRISPR Dependency
IGFBP1	1.21118e-05	0.113394	CRISPR Dependency
RSPH10B2	1.21955e-05	0.127025	CRISPR Dependency
USP17L10	1.22403e-05	-0.131267	CRISPR Dependency
NCOA1	1.2386e-05	0.0985982	CRISPR Dependency
AXDND1	1.24127e-05	0.0989695	CRISPR Dependency
UBE2O	1.24238e-05	0.134501	CRISPR Dependency
HOXB7	1.24472e-05	0.106425	CRISPR Dependency
RPAIN	1.24605e-05	0.190212	CRISPR Dependency
MAP3K8	1.25014e-05	0.0938726	CRISPR Dependency
ZBTB8OS	1.25336e-05	-0.162737	CRISPR Dependency
HN1L	1.2583e-05	0.0968372	CRISPR Dependency
C1orf53	1.26426e-05	0.0987566	CRISPR Dependency
TBCD	1.2662e-05	-0.143015	CRISPR Dependency
ACKR2	1.27342e-05	-0.0749513	CRISPR Dependency
GPR88	1.27767e-05	0.101363	CRISPR Dependency
PRKCDBP	1.28401e-05	0.0906743	CRISPR Dependency
SETD1A	1.29368e-05	0.148866	CRISPR Dependency
STEAP2	1.2945e-05	0.126248	CRISPR Dependency
SCLY	1.30842e-05	0.115537	CRISPR Dependency
CYP27B1	1.31072e-05	0.138255	CRISPR Dependency
C2orf91	1.32615e-05	-0.117727	CRISPR Dependency
UBFD1	1.3437e-05	0.126267	CRISPR Dependency
PTPRN	1.34768e-05	-0.0964276	CRISPR Dependency
HNRNPCL1	1.35437e-05	0.150682	CRISPR Dependency
C1orf195	1.35791e-05	-0.0886784	CRISPR Dependency
ZNF418	1.35983e-05	-0.114571	CRISPR Dependency
HIST1H2AG	1.36996e-05	0.115691	CRISPR Dependency
NHLRC3	1.37385e-05	0.0977532	CRISPR Dependency
ITGB8	1.3953e-05	0.0982887	CRISPR Dependency
LYZL4	1.40206e-05	-0.131588	CRISPR Dependency
HSPB9	1.40931e-05	0.114733	CRISPR Dependency
PSG5	1.4095e-05	0.107173	CRISPR Dependency
PCF11	1.41363e-05	0.18449	CRISPR Dependency
LMBRD1	1.43262e-05	0.0918519	CRISPR Dependency
RAN	1.43968e-05	0.274788	CRISPR Dependency
NSMF	1.44084e-05	0.109845	CRISPR Dependency
ACTR3C	1.45576e-05	0.0865017	CRISPR Dependency
YARS	1.46852e-05	-0.138278	CRISPR Dependency
USP49	1.4704e-05	-0.0815527	CRISPR Dependency
GPR113	1.47923e-05	0.0906313	CRISPR Dependency
OR5AC2	1.49337e-05	-0.0779057	CRISPR Dependency
AP3B1	1.49376e-05	0.129359	CRISPR Dependency
SULT1A4	1.5073e-05	0.118762	CRISPR Dependency
ZSCAN5A	1.53816e-05	0.100655	CRISPR Dependency
FBXO33	1.55599e-05	0.105072	CRISPR Dependency
SMIM7	1.56391e-05	0.134444	CRISPR Dependency
NHP2L1	1.56561e-05	-0.159344	CRISPR Dependency
NT5E	1.56883e-05	0.0910569	CRISPR Dependency
FAM229A	1.57344e-05	0.121499	CRISPR Dependency
DUSP4	1.58073e-05	0.205956	CRISPR Dependency
STX5	1.58935e-05	-0.132809	CRISPR Dependency
SP8	1.59653e-05	0.111686	CRISPR Dependency
KRTAP9-6	1.60492e-05	0.0947687	CRISPR Dependency
ARHGEF16	1.60496e-05	0.0924864	CRISPR Dependency
POLK	1.60575e-05	0.080454	CRISPR Dependency
SH3GLB2	1.60602e-05	0.0967818	CRISPR Dependency
FAM221A	1.6087e-05	0.101554	CRISPR Dependency
ATP5H	1.60874e-05	-0.151572	CRISPR Dependency
PARK7	1.60901e-05	0.0864226	CRISPR Dependency
LONRF2	1.61431e-05	0.104113	CRISPR Dependency
VAT1	1.6416e-05	0.108136	CRISPR Dependency
C7orf73	1.64648e-05	0.0952819	CRISPR Dependency
MTFR1L	1.65504e-05	0.0920061	CRISPR Dependency
KRTAP21-1	1.6619e-05	0.122879	CRISPR Dependency
WDR33	1.6766e-05	-0.158476	CRISPR Dependency
SNAPC4	1.69074e-05	-0.159495	CRISPR Dependency
SLC22A2	1.69922e-05	0.0885237	CRISPR Dependency
SPRTN	1.71479e-05	-0.180321	CRISPR Dependency
ITPRIPL1	1.71899e-05	-0.0843888	CRISPR Dependency
TMC1	1.72569e-05	-0.119543	CRISPR Dependency
GPR180	1.72582e-05	0.0892582	CRISPR Dependency
LBH	1.73001e-05	0.0869865	CRISPR Dependency
MZT2A	1.74149e-05	0.108652	CRISPR Dependency
TTC30B	1.76189e-05	0.0872843	CRISPR Dependency
IMP4	1.7735e-05	-0.137488	CRISPR Dependency
UGT3A2	1.77848e-05	-0.105804	CRISPR Dependency
THBD	1.77939e-05	0.109355	CRISPR Dependency
EVA1B	1.78824e-05	0.0926531	CRISPR Dependency
ZNF780B	1.78924e-05	0.100743	CRISPR Dependency
PNMA1	1.79532e-05	0.0942803	CRISPR Dependency
ABCE1	1.79771e-05	-0.181199	CRISPR Dependency
METTL21B	1.81118e-05	0.120153	CRISPR Dependency
MANF	1.8228e-05	0.151475	CRISPR Dependency
GOLGA6L9	1.82392e-05	-0.105402	CRISPR Dependency
RAB11FIP2	1.83198e-05	0.0929676	CRISPR Dependency
ZBTB24	1.84358e-05	0.125537	CRISPR Dependency
TESK1	1.84398e-05	0.13065	CRISPR Dependency
SP2	1.84602e-05	0.128192	CRISPR Dependency
DAO	1.84829e-05	-0.0831765	CRISPR Dependency
DNAJC9	1.85804e-05	0.328373	CRISPR Dependency
PCDHAC2	1.86965e-05	0.0829917	CRISPR Dependency
POLA2	1.87332e-05	-0.140036	CRISPR Dependency
GBX2	1.87919e-05	0.0922434	CRISPR Dependency
NCR1	1.88206e-05	-0.110621	CRISPR Dependency
CLIC6	1.89152e-05	-0.123783	CRISPR Dependency
OTUD3	1.89556e-05	0.106605	CRISPR Dependency
SLC22A17	1.8978e-05	-0.107007	CRISPR Dependency
SLC16A5	1.89897e-05	-0.118532	CRISPR Dependency
TUBA3D	1.9056e-05	-0.118719	CRISPR Dependency
TBC1D3H	1.91007e-05	0.1616	CRISPR Dependency
C2orf72	1.91396e-05	0.0999421	CRISPR Dependency
MAN2B1	1.9143e-05	-0.0804637	CRISPR Dependency
RNF19B	1.91839e-05	0.0955492	CRISPR Dependency
XKR8	1.92085e-05	0.103695	CRISPR Dependency
GBE1	1.92484e-05	0.0980134	CRISPR Dependency
VPS28	1.92665e-05	-0.150725	CRISPR Dependency
ERH	1.9285e-05	-0.123223	CRISPR Dependency
NLRP12	1.93091e-05	-0.0819198	CRISPR Dependency
KIAA1804	1.95609e-05	0.111659	CRISPR Dependency
CBR3	1.96732e-05	0.114678	CRISPR Dependency
SRSF7	1.98078e-05	0.156816	CRISPR Dependency
OR3A3	1.99385e-05	0.0960111	CRISPR Dependency
CASKIN2	2.00903e-05	0.0972973	CRISPR Dependency
GTF2E2	2.02176e-05	-0.155031	CRISPR Dependency
SLC35E3	2.03176e-05	0.130054	CRISPR Dependency
TCP1	2.03758e-05	0.142302	CRISPR Dependency
PLGLB2	2.05129e-05	0.114695	CRISPR Dependency
TRIM9	2.05507e-05	0.131166	CRISPR Dependency
EEF1E1	2.07012e-05	0.127211	CRISPR Dependency
PSG6	2.0724e-05	-0.125273	CRISPR Dependency
KIFC2	2.07912e-05	0.107056	CRISPR Dependency
FBXL14	2.0796e-05	0.124595	CRISPR Dependency
COL5A3	2.08116e-05	-0.0901517	CRISPR Dependency
THOC3	2.09197e-05	0.15399	CRISPR Dependency
DNMT3B	2.09303e-05	0.0988525	CRISPR Dependency
NWD2	2.10023e-05	0.0951263	CRISPR Dependency
TPGS1	2.10504e-05	0.105433	CRISPR Dependency
HAGH	2.10566e-05	0.100527	CRISPR Dependency
PCDHGA3	2.11073e-05	-0.0787315	CRISPR Dependency
FAM177B	2.11642e-05	-0.0905575	CRISPR Dependency
SMIM6	2.11734e-05	-0.0924557	CRISPR Dependency
TIPRL	2.1208e-05	0.168769	CRISPR Dependency
MRPS33	2.13408e-05	-0.153713	CRISPR Dependency
NAP1L5	2.15593e-05	0.0859272	CRISPR Dependency
SLC9A3R1	2.16505e-05	0.095907	CRISPR Dependency
C1orf210	2.16975e-05	-0.0936198	CRISPR Dependency
PRR20A	2.18037e-05	0.135722	CRISPR Dependency
PRMT3	2.20912e-05	0.0920661	CRISPR Dependency
TNFRSF4	2.21899e-05	0.078573	CRISPR Dependency
GOPC	2.21987e-05	0.0808069	CRISPR Dependency
CPZ	2.22351e-05	0.0894872	CRISPR Dependency
AMIGO2	2.24433e-05	0.102003	CRISPR Dependency
GCC1	2.27941e-05	0.0958465	CRISPR Dependency
R3HCC1L	2.29043e-05	0.0974146	CRISPR Dependency
RABL6	2.31142e-05	0.103089	CRISPR Dependency
BSCL2	2.33679e-05	0.106168	CRISPR Dependency
GREM1	2.39267e-05	0.0898164	CRISPR Dependency
IKZF4	2.40975e-05	-0.0970087	CRISPR Dependency
DDX54	2.41558e-05	-0.136624	CRISPR Dependency
PDGFB	2.41927e-05	-0.113466	CRISPR Dependency
C12orf73	2.42396e-05	0.0996311	CRISPR Dependency
PIGF	2.44373e-05	-0.107126	CRISPR Dependency
TMEM196	2.46266e-05	0.0878764	CRISPR Dependency
TNIP3	2.47582e-05	0.0880922	CRISPR Dependency
GRAMD3	2.47589e-05	-0.0869811	CRISPR Dependency
DLX3	2.47618e-05	0.108946	CRISPR Dependency
KIAA1958	2.47674e-05	-0.0980575	CRISPR Dependency
SDAD1	2.48978e-05	-0.140013	CRISPR Dependency
C20orf24	2.49445e-05	0.101669	CRISPR Dependency
MFSD3	2.49714e-05	0.101048	CRISPR Dependency
HS6ST3	2.50742e-05	0.106642	CRISPR Dependency
FAM53C	2.52092e-05	0.0950455	CRISPR Dependency
UBE2V2	2.52677e-05	0.102068	CRISPR Dependency
SLC2A4RG	2.53521e-05	0.099915	CRISPR Dependency
ISOC2	2.53538e-05	0.0948355	CRISPR Dependency
UGT2B11	2.54091e-05	-0.11551	CRISPR Dependency
VIM	2.54752e-05	0.0990099	CRISPR Dependency
RBPJL	2.56996e-05	0.0874614	CRISPR Dependency
ZNF383	2.58016e-05	-0.109742	CRISPR Dependency
C9orf40	2.59505e-05	0.0926202	CRISPR Dependency
SCN11A	2.60395e-05	-0.0643274	CRISPR Dependency
HSDL2	2.60949e-05	0.0712273	CRISPR Dependency
TMEM81	2.61267e-05	0.0787812	CRISPR Dependency
IQCB1	2.61443e-05	-0.086555	CRISPR Dependency
TMED7	2.64389e-05	0.0984062	CRISPR Dependency
TNS3	2.64604e-05	0.141378	CRISPR Dependency
C1orf116	2.65824e-05	0.0847084	CRISPR Dependency
ANGPT2	2.67663e-05	0.0798852	CRISPR Dependency
CNTF	2.68918e-05	0.0919738	CRISPR Dependency
SLC38A10	2.6899e-05	0.104155	CRISPR Dependency
ALPI	2.69591e-05	-0.112297	CRISPR Dependency
KRT1	2.70674e-05	-0.0827771	CRISPR Dependency
TMEM9B	2.70796e-05	0.109568	CRISPR Dependency
C1orf146	2.71916e-05	-0.0842246	CRISPR Dependency
CGB5	2.72239e-05	0.114215	CRISPR Dependency
OR5AU1	2.73873e-05	-0.100655	CRISPR Dependency
VWA9	2.74901e-05	-0.149262	CRISPR Dependency
SLC4A1AP	2.77566e-05	0.124216	CRISPR Dependency
POTEC	2.77645e-05	-0.117594	CRISPR Dependency
LCE1C	2.79111e-05	-0.0856185	CRISPR Dependency
CFHR1	2.79182e-05	0.0963706	CRISPR Dependency
CHGB	2.79435e-05	-0.111373	CRISPR Dependency
SCAPER	2.80886e-05	0.106029	CRISPR Dependency
C3orf84	2.82896e-05	-0.0798049	CRISPR Dependency
DTX1	2.84139e-05	-0.0824968	CRISPR Dependency
USP7	2.84198e-05	0.236988	CRISPR Dependency
LRRN3	2.84781e-05	0.0823737	CRISPR Dependency
CUL2	2.84944e-05	0.178399	CRISPR Dependency
ST14	2.86062e-05	0.0973633	CRISPR Dependency
GALNT7	2.86411e-05	0.0771848	CRISPR Dependency
STXBP5	2.86722e-05	0.0866731	CRISPR Dependency
C17orf96	2.86876e-05	0.151849	CRISPR Dependency
FDX1	2.8921e-05	0.159534	CRISPR Dependency
OR10G3	2.91172e-05	-0.0983596	CRISPR Dependency
OR10A2	2.9278e-05	-0.098241	CRISPR Dependency
AKIRIN1	2.95166e-05	0.130532	CRISPR Dependency
KRT6C	2.97161e-05	0.0913909	CRISPR Dependency
DMRT1	2.98049e-05	0.0978285	CRISPR Dependency
FCAMR	2.98176e-05	-0.118129	CRISPR Dependency
ANTXRL	2.99551e-05	-0.110988	CRISPR Dependency
PCBD2	3.02428e-05	0.0980209	CRISPR Dependency
EFNA3	3.0575e-05	0.117163	CRISPR Dependency
RASA2	3.06793e-05	0.146693	CRISPR Dependency
THEM6	3.08607e-05	0.102073	CRISPR Dependency
ABHD3	3.1014e-05	0.0940507	CRISPR Dependency
GSDMB	3.11178e-05	0.111829	CRISPR Dependency
CDK4	3.11433e-05	0.261201	CRISPR Dependency
FAM161B	3.11517e-05	-0.0983673	CRISPR Dependency
LEPROT	3.11776e-05	0.0920408	CRISPR Dependency
NAA16	3.13293e-05	0.0889899	CRISPR Dependency
LRRC3B	3.19955e-05	-0.0852308	CRISPR Dependency
LIN7C	3.20365e-05	0.116598	CRISPR Dependency
ADIG	3.21131e-05	0.0851548	CRISPR Dependency
ZFHX2	3.21655e-05	-0.0951264	CRISPR Dependency
CCDC71L	3.24068e-05	0.118346	CRISPR Dependency
TPP2	3.24591e-05	0.0828087	CRISPR Dependency
OR2T2	3.26296e-05	0.110114	CRISPR Dependency
CDK19	3.26481e-05	0.0969598	CRISPR Dependency
RPL7A	3.27946e-05	0.123453	CRISPR Dependency
C5orf60	3.28631e-05	0.0998377	CRISPR Dependency
CD68	3.31595e-05	0.100048	CRISPR Dependency
SPHK1	3.32709e-05	0.100037	CRISPR Dependency
POLR1B	3.32718e-05	-0.154081	CRISPR Dependency
ADRB1	3.32898e-05	0.0888158	CRISPR Dependency
JUN	3.34247e-05	0.183099	CRISPR Dependency
NME1	3.36468e-05	0.0910209	CRISPR Dependency
ZDHHC20	3.38285e-05	0.108423	CRISPR Dependency
MGAT2	3.43174e-05	0.127402	CRISPR Dependency
SUGCT	3.43523e-05	0.084936	CRISPR Dependency
TUBGCP4	3.45325e-05	-0.122944	CRISPR Dependency
SLPI	3.50003e-05	0.0868343	CRISPR Dependency
CDHR1	3.51432e-05	-0.0926692	CRISPR Dependency
LAMP3	3.51439e-05	0.0788432	CRISPR Dependency
TREM1	3.51813e-05	-0.0910758	CRISPR Dependency
TWF2	3.52788e-05	0.107795	CRISPR Dependency
PARP3	3.53014e-05	0.0940925	CRISPR Dependency
GPATCH2	3.53899e-05	0.0893386	CRISPR Dependency
RNF149	3.56182e-05	0.0953044	CRISPR Dependency
BCL6	3.59021e-05	0.113869	CRISPR Dependency
ASB10	3.60516e-05	0.0924485	CRISPR Dependency
NAA30	3.61455e-05	0.120145	CRISPR Dependency
L3HYPDH	3.62238e-05	0.102757	CRISPR Dependency
ADRA1A	3.63358e-05	-0.0875465	CRISPR Dependency
FAM120B	3.63781e-05	0.0752966	CRISPR Dependency
DDX19B	3.64311e-05	-0.129364	CRISPR Dependency
ATL2	3.66331e-05	0.218695	CRISPR Dependency
UBE2E3	3.66832e-05	0.113026	CRISPR Dependency
REG1B	3.68874e-05	-0.0929435	CRISPR Dependency
RIN1	3.69276e-05	0.110819	CRISPR Dependency
PIP5K1A	3.71553e-05	-0.126456	CRISPR Dependency
AGO2	3.74792e-05	0.138964	CRISPR Dependency
PI4K2B	3.7916e-05	0.0869711	CRISPR Dependency
OPCML	3.80204e-05	0.0781605	CRISPR Dependency
FAM209A	3.82996e-05	0.082465	CRISPR Dependency
EFR3B	3.8362e-05	-0.111206	CRISPR Dependency
MC5R	3.87381e-05	-0.128163	CRISPR Dependency
PSMB3	3.88696e-05	0.153251	CRISPR Dependency
HM13	3.91113e-05	0.116814	CRISPR Dependency
CNOT6	3.92052e-05	0.110092	CRISPR Dependency
TAS1R3	3.92556e-05	0.0914693	CRISPR Dependency
CKMT1B	3.92944e-05	0.0874146	CRISPR Dependency
ARHGEF11	3.94961e-05	0.102419	CRISPR Dependency
CCDC71	3.95231e-05	0.0923461	CRISPR Dependency
CLEC18C	3.96086e-05	0.0804732	CRISPR Dependency
WDR54	3.97969e-05	0.137443	CRISPR Dependency
PLA2G10	3.98185e-05	0.171672	CRISPR Dependency
RGS19	3.9899e-05	0.0931011	CRISPR Dependency
BIRC8	3.99309e-05	-0.103432	CRISPR Dependency
HIST1H4D	4.03747e-05	0.105285	CRISPR Dependency
C8orf37	4.05436e-05	0.101436	CRISPR Dependency
GALK1	4.056e-05	0.110407	CRISPR Dependency
MMP9	4.08632e-05	0.0823029	CRISPR Dependency
DUSP11	4.09626e-05	0.108678	CRISPR Dependency
CAPRIN2	4.13272e-05	0.0781232	CRISPR Dependency
PDDC1	4.14478e-05	0.092528	CRISPR Dependency
DNM1	4.16071e-05	0.127271	CRISPR Dependency
GDF7	4.17463e-05	0.105422	CRISPR Dependency
ZNF276	4.18404e-05	0.0950505	CRISPR Dependency
IST1	4.20564e-05	-0.122716	CRISPR Dependency
PRSS50	4.20668e-05	-0.110664	CRISPR Dependency
CHAC1	4.2134e-05	0.093511	CRISPR Dependency
SCGB2A2	4.22422e-05	-0.0915175	CRISPR Dependency
POLR3B	4.23663e-05	-0.157806	CRISPR Dependency
VAX2	4.25554e-05	0.0790448	CRISPR Dependency
C5orf55	4.25811e-05	0.110329	CRISPR Dependency
STAM2	4.28981e-05	0.0902641	CRISPR Dependency
SPATA2	4.29037e-05	0.0869069	CRISPR Dependency
GSTT2B	4.29145e-05	0.140463	CRISPR Dependency
POLR2F	4.30938e-05	-0.109638	CRISPR Dependency
APP	4.31347e-05	0.0938508	CRISPR Dependency
SYT9	4.36286e-05	-0.070602	CRISPR Dependency
KLF10	4.37762e-05	0.118507	CRISPR Dependency
TIMELESS	4.37964e-05	0.122369	CRISPR Dependency
AP5S1	4.40298e-05	-0.0991844	CRISPR Dependency
SULT2A1	4.40415e-05	-0.0868966	CRISPR Dependency
TARBP2	4.41022e-05	0.0997714	CRISPR Dependency
SDF2L1	4.46868e-05	0.128528	CRISPR Dependency
OR2T27	4.46935e-05	0.0986634	CRISPR Dependency
RPS29	4.49048e-05	0.129381	CRISPR Dependency
IDH2	4.49541e-05	0.0916991	CRISPR Dependency
ANKRD10	4.50772e-05	0.10881	CRISPR Dependency
C20orf195	4.53033e-05	0.0994992	CRISPR Dependency
PMFBP1	4.56472e-05	0.0926345	CRISPR Dependency
HEPACAM2	4.57546e-05	0.0811195	CRISPR Dependency
FUCA1	4.60137e-05	0.0979138	CRISPR Dependency
ORMDL1	4.60247e-05	0.0904278	CRISPR Dependency
ANKRD13C	4.60427e-05	0.109357	CRISPR Dependency
DHX38	4.62414e-05	-0.127589	CRISPR Dependency
FAM86C1	4.63154e-05	0.133918	CRISPR Dependency
SNTG2	4.6473e-05	0.0773151	CRISPR Dependency
TFAP2A	4.6505e-05	0.16084	CRISPR Dependency
ZMYM6	4.66097e-05	0.0813086	CRISPR Dependency
ATP6V1C1	4.69949e-05	-0.166899	CRISPR Dependency
CLEC17A	4.72611e-05	-0.0797704	CRISPR Dependency
WDFY4	4.73106e-05	-0.0909087	CRISPR Dependency
SIRPB1	4.73353e-05	-0.083091	CRISPR Dependency
ANKRD39	4.76848e-05	0.10207	CRISPR Dependency
SLC16A14	4.796e-05	-0.097137	CRISPR Dependency
WWC2	4.80783e-05	-0.0965908	CRISPR Dependency
C9orf78	4.8111e-05	-0.125554	CRISPR Dependency
FEZ2	4.8346e-05	0.106652	CRISPR Dependency
LCE6A	4.83733e-05	-0.0845803	CRISPR Dependency
BIN2	4.85359e-05	-0.0867799	CRISPR Dependency
PDCL	4.85655e-05	0.150575	CRISPR Dependency
B9D1	4.86012e-05	-0.108018	CRISPR Dependency
IL21R	4.86051e-05	-0.082295	CRISPR Dependency
APITD1	4.89334e-05	0.0905828	CRISPR Dependency
METTL14	4.8944e-05	-0.185899	CRISPR Dependency
PSMD7	4.89904e-05	0.174248	CRISPR Dependency
ZC3H7A	4.90583e-05	0.121357	CRISPR Dependency
MST1	4.90787e-05	0.163009	CRISPR Dependency
ZNF446	4.94001e-05	-0.13241	CRISPR Dependency
STRN3	4.95715e-05	0.10005	CRISPR Dependency
TIGD6	4.96966e-05	0.0847178	CRISPR Dependency
SCGB2B2	4.97572e-05	-0.0910166	CRISPR Dependency
GMPR	4.97631e-05	0.0814883	CRISPR Dependency
ZNF91	4.97902e-05	-0.100819	CRISPR Dependency
NEK9	4.98487e-05	0.0965928	CRISPR Dependency
C19orf60	4.99339e-05	0.113121	CRISPR Dependency
CTNND1	4.99825e-05	0.144204	CRISPR Dependency
PLBD1	5.02795e-05	0.0965129	CRISPR Dependency
GLIPR1L1	5.02886e-05	0.100784	CRISPR Dependency
NXNL1	5.0319e-05	-0.0990965	CRISPR Dependency
ADH5	5.03481e-05	-0.0844125	CRISPR Dependency
SAT2	5.09488e-05	0.0813777	CRISPR Dependency
CLDN24	5.11139e-05	0.0530763	CRISPR Dependency
WNT8B	5.11814e-05	0.0844772	CRISPR Dependency
ZMAT2	5.11824e-05	0.15048	CRISPR Dependency
SLC26A10	5.11921e-05	0.105382	CRISPR Dependency
TMEM260	5.11923e-05	0.0980901	CRISPR Dependency
KMO	5.13249e-05	0.0937211	CRISPR Dependency
SLC43A3	5.13632e-05	0.0843845	CRISPR Dependency
TRIM38	5.14593e-05	0.0888386	CRISPR Dependency
PDS5A	5.17839e-05	0.20965	CRISPR Dependency
IPO9	5.17856e-05	0.175696	CRISPR Dependency
OR6B2	5.19529e-05	-0.132617	CRISPR Dependency
DCAF10	5.22961e-05	0.0974501	CRISPR Dependency
PCDHA8	5.24047e-05	0.0899588	CRISPR Dependency
IFNA8	5.29422e-05	-0.0879957	CRISPR Dependency
OVCA2	5.3159e-05	0.132716	CRISPR Dependency
FZD8	5.32651e-05	0.0855094	CRISPR Dependency
CTAGE9	5.34789e-05	-0.0949246	CRISPR Dependency
C21orf33	5.35238e-05	0.0986455	CRISPR Dependency
MTFP1	5.35704e-05	0.103881	CRISPR Dependency
PRDX6	5.38581e-05	0.115659	CRISPR Dependency
PSPC1	5.38955e-05	0.15326	CRISPR Dependency
TRIM46	5.40232e-05	0.111459	CRISPR Dependency
FOSL2	5.40279e-05	0.133316	CRISPR Dependency
OSBPL2	5.40403e-05	0.0840794	CRISPR Dependency
FAM150B	5.47863e-05	0.0802464	CRISPR Dependency
VOPP1	5.56177e-05	0.127901	CRISPR Dependency
CACNA1G	5.56834e-05	0.110566	CRISPR Dependency
DBP	5.58074e-05	0.102792	CRISPR Dependency
SYMPK	5.58382e-05	-0.110867	CRISPR Dependency
TEX29	5.58666e-05	-0.105701	CRISPR Dependency
GBP2	5.61718e-05	-0.102391	CRISPR Dependency
PDCD2	5.65103e-05	0.221745	CRISPR Dependency
ETV4	5.67905e-05	0.0994419	CRISPR Dependency
MANSC1	5.70904e-05	0.0935629	CRISPR Dependency
DHRS4	5.74496e-05	0.124242	CRISPR Dependency
KIAA0196	5.74875e-05	0.124178	CRISPR Dependency
PGBD3	5.75074e-05	-0.0815168	CRISPR Dependency
SPATA3	5.76248e-05	-0.0966613	CRISPR Dependency
AMFR	5.78902e-05	0.123078	CRISPR Dependency
RNF217	5.80696e-05	0.0875463	CRISPR Dependency
SOCS1	5.82364e-05	0.087051	CRISPR Dependency
C1orf159	5.84025e-05	0.0915867	CRISPR Dependency
PLD5	5.85314e-05	0.0756274	CRISPR Dependency
HOXB3	5.89128e-05	0.0964028	CRISPR Dependency
DSG2	5.92994e-05	0.086722	CRISPR Dependency
C16orf93	5.94067e-05	0.112736	CRISPR Dependency
SLC25A1	5.98607e-05	0.139614	CRISPR Dependency
FAM24B	6.0316e-05	0.0912659	CRISPR Dependency
MEPE	6.03308e-05	-0.11186	CRISPR Dependency
KIAA1033	6.07355e-05	0.108234	CRISPR Dependency
ZNF679	6.08214e-05	-0.097836	CRISPR Dependency
RABAC1	6.10201e-05	0.10465	CRISPR Dependency
OR10J5	6.11651e-05	-0.0663267	CRISPR Dependency
DEFB135	6.12999e-05	0.099596	CRISPR Dependency
NRARP	6.15536e-05	0.100584	CRISPR Dependency
MMP23B	6.18457e-05	0.101753	CRISPR Dependency
SOX12	6.18753e-05	0.104503	CRISPR Dependency
FAM167A	6.189e-05	-0.0918325	CRISPR Dependency
BTBD8	6.18904e-05	0.0871412	CRISPR Dependency
PROCR	6.22154e-05	0.094985	CRISPR Dependency
PPM1D	6.23956e-05	0.189591	CRISPR Dependency
TSPAN13	6.27655e-05	0.0844702	CRISPR Dependency
MBOAT1	6.31301e-05	0.0751585	CRISPR Dependency
STRA13	6.31506e-05	0.145385	CRISPR Dependency
FAM153B	6.32296e-05	0.0886162	CRISPR Dependency
PAQR6	6.33413e-05	0.106487	CRISPR Dependency
HIVEP3	6.34795e-05	-0.0904063	CRISPR Dependency
SLC7A13	6.38732e-05	0.0955075	CRISPR Dependency
ZNF273	6.43159e-05	-0.129569	CRISPR Dependency
SNCA	6.45896e-05	0.0800011	CRISPR Dependency
DYRK4	6.49013e-05	0.0642899	CRISPR Dependency
RNPEP	6.53246e-05	0.0970996	CRISPR Dependency
AVL9	6.54833e-05	0.0828312	CRISPR Dependency
UGT3A1	6.56587e-05	-0.104626	CRISPR Dependency
SH3D21	6.57189e-05	-0.0828448	CRISPR Dependency
CLUL1	6.57923e-05	0.0811634	CRISPR Dependency
CYP4Z1	6.59604e-05	0.0849075	CRISPR Dependency
LHFPL2	6.61803e-05	-0.0883572	CRISPR Dependency
GBP1	6.6444e-05	0.0867412	CRISPR Dependency
FAM110C	6.65368e-05	0.106247	CRISPR Dependency
EEF2	6.66527e-05	0.16839	CRISPR Dependency
PLA2G12A	6.71829e-05	-0.0933596	CRISPR Dependency
INTS12	6.71964e-05	0.194181	CRISPR Dependency
ZFAND6	6.72935e-05	0.0871693	CRISPR Dependency
KMT2E	6.735e-05	0.117555	CRISPR Dependency
USP42	6.73931e-05	0.0977887	CRISPR Dependency
PRDX5	6.79855e-05	0.100638	CRISPR Dependency
DEFB131	6.81437e-05	-0.0991144	CRISPR Dependency
SLC22A6	6.85065e-05	-0.0970114	CRISPR Dependency
FOXD4L1	6.8799e-05	0.107123	CRISPR Dependency
PILRB	6.88179e-05	0.100414	CRISPR Dependency
DAZL	6.90754e-05	0.0853865	CRISPR Dependency
PLBD2	6.91761e-05	0.0757262	CRISPR Dependency
COX7A2L	6.92439e-05	0.0844718	CRISPR Dependency
LTN1	6.94861e-05	0.101245	CRISPR Dependency
LAIR1	6.95267e-05	-0.0898234	CRISPR Dependency
NIP7	6.99107e-05	0.155908	CRISPR Dependency
DUSP12	7.02585e-05	0.102975	CRISPR Dependency
ZDHHC18	7.0298e-05	0.0863092	CRISPR Dependency
SPRR1A	7.03507e-05	0.0678418	CRISPR Dependency
KATNBL1	7.10118e-05	-0.0882661	CRISPR Dependency
MAS1L	7.17525e-05	0.0794437	CRISPR Dependency
CARD8	7.21594e-05	-0.0858499	CRISPR Dependency
FAM76B	7.22088e-05	0.107693	CRISPR Dependency
FABP1	7.26423e-05	-0.0886389	CRISPR Dependency
EIF3G	7.35219e-05	0.145315	CRISPR Dependency
ANKFN1	7.35878e-05	-0.073914	CRISPR Dependency
APEH	7.36181e-05	0.0875254	CRISPR Dependency
USP24	7.3947e-05	0.108165	CRISPR Dependency
F11R	7.44576e-05	0.108648	CRISPR Dependency
PRDM7	7.44797e-05	0.0944257	CRISPR Dependency
ZNF492	7.50662e-05	-0.137225	CRISPR Dependency
NPS	7.55476e-05	0.0835688	CRISPR Dependency
SLC25A4	7.56418e-05	0.0740095	CRISPR Dependency
C8orf88	7.57657e-05	0.0981489	CRISPR Dependency
SFN	7.61794e-05	0.0834631	CRISPR Dependency
HELB	7.68551e-05	0.100325	CRISPR Dependency
SVIP	7.69369e-05	0.103793	CRISPR Dependency
LARS	7.70307e-05	-0.126099	CRISPR Dependency
ZNF726	7.79601e-05	0.0859238	CRISPR Dependency
LSMEM1	7.80088e-05	0.0867274	CRISPR Dependency
ZNF177	7.82125e-05	-0.089075	CRISPR Dependency
TOM1L1	7.84641e-05	0.0934182	CRISPR Dependency
CSTB	7.85366e-05	0.0886464	CRISPR Dependency
CD55	7.87426e-05	0.0882442	CRISPR Dependency
AP1G2	7.93257e-05	0.119408	CRISPR Dependency
PRDM6	7.93624e-05	0.0862683	CRISPR Dependency
FAM86A	7.94057e-05	0.138383	CRISPR Dependency
CPT2	8.00724e-05	0.103585	CRISPR Dependency
CYP2U1	8.05999e-05	0.0987666	CRISPR Dependency
SLC46A3	8.07824e-05	0.0886016	CRISPR Dependency
STAMBPL1	8.09058e-05	0.0716565	CRISPR Dependency
CFHR2	8.10436e-05	0.0840933	CRISPR Dependency
UTP6	8.10457e-05	-0.166306	CRISPR Dependency
ALG12	8.17893e-05	0.155721	CRISPR Dependency
FAM65B	8.18805e-05	-0.0810455	CRISPR Dependency
HNMT	8.21632e-05	0.092997	CRISPR Dependency
NUDT22	8.25562e-05	0.0994116	CRISPR Dependency
DPY19L1	8.26612e-05	0.0912905	CRISPR Dependency
ISOC1	8.27334e-05	0.0995932	CRISPR Dependency
ASAH2B	8.29487e-05	0.0916073	CRISPR Dependency
C19orf53	8.34228e-05	0.162242	CRISPR Dependency
OR9A2	8.35605e-05	-0.0957265	CRISPR Dependency
IFT46	8.39692e-05	-0.0932047	CRISPR Dependency
PSMA2	8.42889e-05	-0.14185	CRISPR Dependency
RAP2A	8.44118e-05	0.117486	CRISPR Dependency
MAP1LC3A	8.44771e-05	0.105316	CRISPR Dependency
MYNN	8.46909e-05	0.0957192	CRISPR Dependency
PHLDA2	8.49436e-05	0.105354	CRISPR Dependency
FAM69A	8.50922e-05	0.104171	CRISPR Dependency
ZBTB45	8.52975e-05	0.111782	CRISPR Dependency
FAM134C	8.5888e-05	0.093106	CRISPR Dependency
PEA15	8.63714e-05	0.113097	CRISPR Dependency
HBG2	8.66119e-05	-0.0608981	CRISPR Dependency
PIGC	8.66354e-05	0.0907274	CRISPR Dependency
POLR2E	8.69752e-05	-0.135181	CRISPR Dependency
CIZ1	8.69901e-05	0.0943199	CRISPR Dependency
HIST2H2AA3	8.72573e-05	0.125492	CRISPR Dependency
RASSF4	8.73287e-05	0.103966	CRISPR Dependency
KRT72	8.74065e-05	-0.100452	CRISPR Dependency
COPB1	8.83079e-05	0.151734	CRISPR Dependency
SMYD2	8.83305e-05	0.0847837	CRISPR Dependency
ECI1	8.83684e-05	0.104028	CRISPR Dependency
COPS2	8.93985e-05	-0.134349	CRISPR Dependency
RRM2	9.02515e-05	0.184771	CRISPR Dependency
E2F1	9.02837e-05	0.145611	CRISPR Dependency
S100PBP	9.05477e-05	0.0754238	CRISPR Dependency
CDH18	9.07809e-05	0.087987	CRISPR Dependency
IPO5	9.10732e-05	0.144732	CRISPR Dependency
FAM89A	9.13475e-05	0.0883146	CRISPR Dependency
ST8SIA6	9.1877e-05	0.0951032	CRISPR Dependency
CCDC135	9.20021e-05	-0.0719697	CRISPR Dependency
HIST1H2AB	9.21528e-05	0.110626	CRISPR Dependency
RWDD2A	9.22794e-05	0.072671	CRISPR Dependency
OR2L8	9.23277e-05	-0.10021	CRISPR Dependency
PPY	9.27188e-05	-0.111385	CRISPR Dependency
PRDX3	9.33733e-05	-0.0835185	CRISPR Dependency
POTEF	9.33893e-05	-0.13397	CRISPR Dependency
TDRD7	9.37327e-05	0.0757938	CRISPR Dependency
PDC	9.47324e-05	0.0697563	CRISPR Dependency
PRDM9	9.50201e-05	-0.0780116	CRISPR Dependency
SUMO4	9.50586e-05	-0.10352	CRISPR Dependency
MT1G	9.51719e-05	-0.106478	CRISPR Dependency
SLC44A1	9.56207e-05	0.0773092	CRISPR Dependency
PCNXL2	9.58511e-05	0.101172	CRISPR Dependency
ACADVL	9.61715e-05	0.0921275	CRISPR Dependency
CDK5	9.62807e-05	0.116556	CRISPR Dependency
B4GALT1	9.6354e-05	0.0934767	CRISPR Dependency
FAM96B	9.6499e-05	0.145912	CRISPR Dependency
TRIOBP	9.65568e-05	0.088867	CRISPR Dependency
U2AF1	9.65688e-05	-0.136985	CRISPR Dependency
LIPF	9.6833e-05	-0.0810786	CRISPR Dependency
ZNF277	9.75568e-05	0.0961559	CRISPR Dependency
CTC1	9.79798e-05	-0.157817	CRISPR Dependency
TIPIN	9.80554e-05	-0.119729	CRISPR Dependency
RCHY1	9.8218e-05	0.0931562	CRISPR Dependency
SNTB2	0.000100212	0.0956508	CRISPR Dependency
YOD1	0.000100569	0.0780642	CRISPR Dependency
FBXL16	0.000100905	0.09573	CRISPR Dependency
TNNI3K	0.000101019	0.07304	CRISPR Dependency
CD86	0.000101333	-0.0682853	CRISPR Dependency
CXCL14	0.000101481	0.0863191	CRISPR Dependency
TMEM240	0.000101711	0.126867	CRISPR Dependency
C2orf68	0.000102588	0.11866	CRISPR Dependency
PRSS38	0.000102726	0.0849083	CRISPR Dependency
SLC4A5	0.000102905	-0.096491	CRISPR Dependency
C19orf84	0.000103091	-0.0907513	CRISPR Dependency
HOXD9	0.000103609	0.0898155	CRISPR Dependency
EPHA5	0.000104103	-0.119728	CRISPR Dependency
EMX1	0.000104237	0.0959217	CRISPR Dependency
CCSAP	0.000104534	0.113968	CRISPR Dependency
EPB41L5	0.000104812	-0.098056	CRISPR Dependency
HRH1	0.000105404	0.0732174	CRISPR Dependency
NBPF6	0.000105482	0.116354	CRISPR Dependency
PRMT6	0.00010579	0.0889631	CRISPR Dependency
C9orf24	0.000105792	0.0946094	CRISPR Dependency
PTK2	0.000105828	0.192026	CRISPR Dependency
SPSB2	0.000105883	0.0883842	CRISPR Dependency
TMEM243	0.000106086	0.0853814	CRISPR Dependency
NPIPA1	0.000106267	0.142561	CRISPR Dependency
PIGH	0.000106649	0.108509	CRISPR Dependency
FAM198B	0.000107024	0.0870477	CRISPR Dependency
UCHL5	0.000107505	0.138861	CRISPR Dependency
CPNE8	0.000107686	0.0654392	CRISPR Dependency
CCNO	0.000107856	0.0709097	CRISPR Dependency
ERCC6L2	0.000108081	0.0926901	CRISPR Dependency
TM2D3	0.000108117	0.125061	CRISPR Dependency
LCE2A	0.000108418	-0.0960034	CRISPR Dependency
NOM1	0.000108729	0.134694	CRISPR Dependency
LYG2	0.000109692	0.0834737	CRISPR Dependency
NTS	0.00011017	0.0768418	CRISPR Dependency
OR2W3	0.000110577	0.0732909	CRISPR Dependency
SRCAP	0.000111398	0.121431	CRISPR Dependency
RNF166	0.000111546	0.0711301	CRISPR Dependency
CD300C	0.000111567	0.0885847	CRISPR Dependency
OR2C3	0.000111689	0.0918402	CRISPR Dependency
CRKL	0.000112232	0.274827	CRISPR Dependency
RNF133	0.000112276	-0.0730641	CRISPR Dependency
PRAMEF11	0.000112517	-0.0890241	CRISPR Dependency
RPL11	0.000112986	0.150241	CRISPR Dependency
MAP3K11	0.000113069	0.108889	CRISPR Dependency
SPNS1	0.000113081	0.120989	CRISPR Dependency
CHCHD4	0.000114015	-0.135199	CRISPR Dependency
NIPSNAP1	0.000114041	0.0949575	CRISPR Dependency
TRPV1	0.000114287	-0.0918067	CRISPR Dependency
ASPSCR1	0.000114526	-0.0856516	CRISPR Dependency
PPP1R14C	0.000114589	0.0815049	CRISPR Dependency
WNT9A	0.000114911	0.07687	CRISPR Dependency
CDV3	0.000114926	-0.0926688	CRISPR Dependency
TMCO1	0.000115507	0.104084	CRISPR Dependency
FJX1	0.000115863	0.0856201	CRISPR Dependency
POLR2L	0.000116132	0.170216	CRISPR Dependency
TRERF1	0.000116965	-0.0963752	CRISPR Dependency
MED12L	0.000117515	-0.103745	CRISPR Dependency
REP15	0.000117752	0.0820864	CRISPR Dependency
TIMM9	0.000117849	-0.168721	CRISPR Dependency
OR4A5	0.000118356	-0.0921259	CRISPR Dependency
FOXQ1	0.000118372	0.0959104	CRISPR Dependency
KRTAP1-1	0.000118509	0.0984395	CRISPR Dependency
NUP85	0.000118692	-0.122926	CRISPR Dependency
DMTF1	0.00012009	0.0889224	CRISPR Dependency
ABCC6	0.000120141	0.117643	CRISPR Dependency
CFDP1	0.000120794	0.110573	CRISPR Dependency
PXMP2	0.000121077	0.0917932	CRISPR Dependency
ATPAF1	0.000121199	0.0882071	CRISPR Dependency
USP35	0.000121264	-0.104005	CRISPR Dependency
ABCA7	0.000121369	0.0847952	CRISPR Dependency
TPTE2	0.000121599	-0.0852936	CRISPR Dependency
FAM111B	0.000122692	0.0929681	CRISPR Dependency
KRT18	0.000122828	-0.163702	CRISPR Dependency
PROKR1	0.000122981	-0.066523	CRISPR Dependency
SFRP5	0.000123312	0.0788585	CRISPR Dependency
DUSP3	0.000124363	0.110714	CRISPR Dependency
EEF1A1	0.000124469	0.112888	CRISPR Dependency
EDEM3	0.000124791	0.0746781	CRISPR Dependency
ECT2L	0.000125099	-0.106261	CRISPR Dependency
FAM216A	0.000125283	0.0783869	CRISPR Dependency
C9orf57	0.000125708	-0.0795601	CRISPR Dependency
ASB5	0.000125903	0.0776402	CRISPR Dependency
IGFLR1	0.000126236	0.112389	CRISPR Dependency
MYPN	0.000126269	-0.0799983	CRISPR Dependency
HTRA3	0.000126671	0.0814554	CRISPR Dependency
FAM177A1	0.000126694	0.113235	CRISPR Dependency
LAMC2	0.000128091	0.102611	CRISPR Dependency
RRAD	0.000128212	0.113711	CRISPR Dependency
NACC2	0.000128634	0.099848	CRISPR Dependency
PPFIA2	0.0001287	0.0979734	CRISPR Dependency
ENHO	0.000128837	-0.0945584	CRISPR Dependency
NHLRC2	0.000128895	0.223077	CRISPR Dependency
RTEL1	0.000129201	-0.141717	CRISPR Dependency
EFCAB2	0.000129257	0.0826737	CRISPR Dependency
IRX1	0.000129826	0.0888243	CRISPR Dependency
SRR	0.000130208	0.0769787	CRISPR Dependency
BCL2A1	0.000130378	0.105183	CRISPR Dependency
IFNA14	0.000130608	-0.11453	CRISPR Dependency
SIX5	0.000130785	0.0855323	CRISPR Dependency
NRGN	0.000131477	0.0824351	CRISPR Dependency
PCDHGA11	0.000131571	0.0681288	CRISPR Dependency
BBS5	0.00013201	-0.0724739	CRISPR Dependency
PCBP1	0.000132128	0.152654	CRISPR Dependency
TCEB3CL	0.000132175	0.146601	CRISPR Dependency
SRSF4	0.000132378	0.0889289	CRISPR Dependency
INPP5B	0.000133355	0.075841	CRISPR Dependency
OAZ3	0.000133376	-0.0934662	CRISPR Dependency
KIF2C	0.000133951	0.146844	CRISPR Dependency
SNX3	0.000135458	0.0915872	CRISPR Dependency
H2AFZ	0.000135496	0.183329	CRISPR Dependency
TBC1D9	0.000135976	0.0803451	CRISPR Dependency
WFDC13	0.000136902	-0.0850747	CRISPR Dependency
ZNF737	0.000138163	-0.0808379	CRISPR Dependency
CAMK2G	0.000138197	0.0874773	CRISPR Dependency
NTF4	0.000138473	-0.100346	CRISPR Dependency
OR51D1	0.000138546	0.0752015	CRISPR Dependency
OR4F5	0.000138803	-0.124259	CRISPR Dependency
SRFBP1	0.000139102	0.164069	CRISPR Dependency
RPL8	0.000139231	0.147367	CRISPR Dependency
C1orf35	0.00013944	0.0898629	CRISPR Dependency
HDAC7	0.000139774	0.121962	CRISPR Dependency
MED18	0.000140505	-0.108565	CRISPR Dependency
WDR41	0.00014146	0.0810903	CRISPR Dependency
POLL	0.00014155	0.0861267	CRISPR Dependency
SUPT16H	0.000141715	-0.129595	CRISPR Dependency
DBH	0.000142082	-0.0755977	CRISPR Dependency
CRNKL1	0.000142202	-0.124599	CRISPR Dependency
CASC5	0.000142535	-0.131062	CRISPR Dependency
ARL6IP5	0.000142591	0.102478	CRISPR Dependency
LRRFIP1	0.000142599	0.0777591	CRISPR Dependency
PPM1H	0.000142612	0.08655	CRISPR Dependency
C11orf31	0.000142964	0.106613	CRISPR Dependency
TMEM184C	0.000143135	0.0758815	CRISPR Dependency
LCMT2	0.000143289	0.103674	CRISPR Dependency
FPGT	0.000143764	0.0766515	CRISPR Dependency
FBXL6	0.000143832	0.102957	CRISPR Dependency
LSM1	0.000145019	-0.0960683	CRISPR Dependency
ST6GALNAC4	0.000145391	-0.0969687	CRISPR Dependency
BCAS4	0.000145437	0.0924646	CRISPR Dependency
AURKB	0.000146626	-0.124715	CRISPR Dependency
ANKRD22	0.00014697	0.0916555	CRISPR Dependency
LASP1	0.000147196	0.0843417	CRISPR Dependency
NCOA3	0.000148107	0.104505	CRISPR Dependency
GABRD	0.000148652	0.0861892	CRISPR Dependency
TMEM254	0.00014913	0.0954485	CRISPR Dependency
MIA2	0.00014966	0.0693677	CRISPR Dependency
SFMBT2	0.000150122	-0.0873827	CRISPR Dependency
MUC20	0.000150157	0.130763	CRISPR Dependency
SCRN3	0.000150216	0.0726109	CRISPR Dependency
IMMP2L	0.000151591	0.0803556	CRISPR Dependency
KDELR3	0.000152189	0.0895803	CRISPR Dependency
STRA6	0.000152773	0.0863454	CRISPR Dependency
CUTA	0.000153023	0.0936457	CRISPR Dependency
HTATIP2	0.000153363	0.0836233	CRISPR Dependency
DAG1	0.00015358	0.0756847	CRISPR Dependency
CDC42EP1	0.000154095	0.0833679	CRISPR Dependency
MAN1A2	0.000154147	0.111485	CRISPR Dependency
INPP4A	0.000154473	0.118349	CRISPR Dependency
ZNF285	0.000154602	-0.090867	CRISPR Dependency
ZCCHC6	0.000154827	0.087321	CRISPR Dependency
AMDHD2	0.000155365	0.0836687	CRISPR Dependency
TMBIM4	0.000155535	0.0998954	CRISPR Dependency
ZNF692	0.000155685	0.0860994	CRISPR Dependency
TTLL11	0.000156629	0.0992004	CRISPR Dependency
ZZZ3	0.00015682	0.102371	CRISPR Dependency
FUOM	0.000156843	0.0851653	CRISPR Dependency
DTX4	0.000156902	0.0770088	CRISPR Dependency
POLR3D	0.000160756	-0.139283	CRISPR Dependency
HCLS1	0.000160787	-0.0819161	CRISPR Dependency
GP6	0.000160998	0.0799095	CRISPR Dependency
HS3ST4	0.000161133	0.0802264	CRISPR Dependency
TMEM178A	0.000161159	0.0970738	CRISPR Dependency
NUF2	0.000162441	-0.158765	CRISPR Dependency
OR2B2	0.000162727	-0.0897034	CRISPR Dependency
VIMP	0.000162762	0.0903798	CRISPR Dependency
ZNF20	0.000164576	-0.0859398	CRISPR Dependency
MGEA5	0.000164706	0.130507	CRISPR Dependency
PDE4DIP	0.000164971	-0.114227	CRISPR Dependency
HES4	0.000166165	0.089524	CRISPR Dependency
LIX1L	0.000166268	0.0899496	CRISPR Dependency
HGS	0.000166294	-0.135109	CRISPR Dependency
NSA2	0.000168217	-0.124636	CRISPR Dependency
BAG1	0.000169507	0.0666799	CRISPR Dependency
FIBP	0.000170318	0.122934	CRISPR Dependency
NAA50	0.000170933	-0.135092	CRISPR Dependency
WDR76	0.000171653	0.0895479	CRISPR Dependency
WBSCR27	0.000172432	0.0860266	CRISPR Dependency
GNG11	0.000172623	0.0678247	CRISPR Dependency
ZFAND1	0.000173381	0.0909046	CRISPR Dependency
DAP3	0.0001739	-0.149264	CRISPR Dependency
KIF5B	0.000175405	0.0894355	CRISPR Dependency
SLC37A3	0.000177322	0.0843554	CRISPR Dependency
DPH7	0.000177465	0.0993707	CRISPR Dependency
TAF8	0.000179295	0.162773	CRISPR Dependency
RCC1	0.000179455	-0.118435	CRISPR Dependency
CFL1	0.000179474	-0.191403	CRISPR Dependency
RBM15B	0.000179762	0.0871981	CRISPR Dependency
ZNF195	0.000180292	-0.0962077	CRISPR Dependency
ARHGAP23	0.000180365	-0.0925682	CRISPR Dependency
ADCK2	0.000180675	0.100382	CRISPR Dependency
CSRP2	0.000181433	0.0808643	CRISPR Dependency
PTGES2	0.000182584	0.0898434	CRISPR Dependency
MANEAL	0.000184164	0.0811573	CRISPR Dependency
TMEM238	0.000184359	0.078994	CRISPR Dependency
GREM2	0.000186494	0.0806414	CRISPR Dependency
SGPP2	0.000187771	0.0710672	CRISPR Dependency
NAGPA	0.00018807	0.0975711	CRISPR Dependency
WDR89	0.000188504	0.102489	CRISPR Dependency
ATP6V0C	0.000188552	0.123795	CRISPR Dependency
SIMC1	0.00018931	0.11893	CRISPR Dependency
OR1L4	0.000189316	0.0715738	CRISPR Dependency
GPR157	0.000189536	0.0840627	CRISPR Dependency
NECAP2	0.000189651	0.0836666	CRISPR Dependency
ZNF736	0.000190287	-0.0910584	CRISPR Dependency
ZNHIT2	0.000190331	0.153883	CRISPR Dependency
TAX1BP3	0.000190412	0.0877798	CRISPR Dependency
APTX	0.000191028	0.083924	CRISPR Dependency
MBLAC1	0.000192746	0.0857841	CRISPR Dependency
FAM53B	0.000193485	0.0833993	CRISPR Dependency
LRRC15	0.000193544	-0.102759	CRISPR Dependency
PITPNA	0.000193705	0.0708287	CRISPR Dependency
ZNF57	0.000193953	0.0876131	CRISPR Dependency
MSS51	0.000194039	-0.0964713	CRISPR Dependency
DDX27	0.000194137	0.154775	CRISPR Dependency
EDEM2	0.000194351	0.105287	CRISPR Dependency
BMPER	0.000194799	0.0668129	CRISPR Dependency
SLFN12	0.000194943	-0.0891975	CRISPR Dependency
LTV1	0.000195283	-0.112628	CRISPR Dependency
MAP1S	0.000196277	-0.100071	CRISPR Dependency
ETV6	0.000196692	0.117754	CRISPR Dependency
FAM213B	0.000196825	0.0875243	CRISPR Dependency
CCR10	0.000198883	0.0847786	CRISPR Dependency
C2orf27B	0.00019943	-0.0860301	CRISPR Dependency
SLC15A3	0.000200295	0.0899154	CRISPR Dependency
OVGP1	0.000201776	0.106515	CRISPR Dependency
R3HDM1	0.000202251	0.0921314	CRISPR Dependency
NOL12	0.000202318	-0.124672	CRISPR Dependency
BPIFA2	0.000203281	-0.0863666	CRISPR Dependency
MSI2	0.000203779	0.109402	CRISPR Dependency
APRT	0.000204251	0.0870966	CRISPR Dependency
AKR1A1	0.000204292	0.076204	CRISPR Dependency
GDE1	0.000204294	0.0855696	CRISPR Dependency
PIM3	0.00020508	0.0979281	CRISPR Dependency
PXDC1	0.000205609	0.0728719	CRISPR Dependency
RNF214	0.000205792	0.102667	CRISPR Dependency
RAB22A	0.000206635	0.0959247	CRISPR Dependency
CCNT2	0.000206958	0.090831	CRISPR Dependency
NUP98	0.000207048	-0.114128	CRISPR Dependency
TRMT13	0.00020746	0.0831629	CRISPR Dependency
HIST2H4B	0.000207547	0.124543	CRISPR Dependency
TMEM59L	0.000207715	-0.0948328	CRISPR Dependency
UBIAD1	0.000208558	0.204488	CRISPR Dependency
ZAR1	0.000208915	0.0911725	CRISPR Dependency
ZIC5	0.000209371	0.0806434	CRISPR Dependency
C1orf123	0.000209906	0.0825863	CRISPR Dependency
ERICH6	0.000210576	0.089661	CRISPR Dependency
CYP4B1	0.000211133	-0.0906002	CRISPR Dependency
GALNT9	0.000211795	0.0656526	CRISPR Dependency
RPL41	0.000212373	0.107925	CRISPR Dependency
RPF2	0.000213708	-0.160478	CRISPR Dependency
NUGGC	0.000213885	-0.09405	CRISPR Dependency
PDCL3	0.000214056	-0.110012	CRISPR Dependency
KDM4C	0.000215839	0.0754274	CRISPR Dependency
ALLC	0.000218684	0.0739312	CRISPR Dependency
EIF4EBP3	0.000219386	0.0792764	CRISPR Dependency
CLPSL2	0.000220079	0.0829163	CRISPR Dependency
GYPA	0.00022193	0.0808419	CRISPR Dependency
ABCC4	0.000222204	-0.0921362	CRISPR Dependency
GSTO2	0.000222729	0.0793337	CRISPR Dependency
KLHL42	0.000223106	0.079669	CRISPR Dependency
POLR1A	0.00022321	-0.102841	CRISPR Dependency
CLDN12	0.000223426	0.0783248	CRISPR Dependency
E2F3	0.000223588	0.139179	CRISPR Dependency
EYA3	0.000224088	0.091887	CRISPR Dependency
NUDT4	0.000224101	0.160043	CRISPR Dependency
WDR93	0.000224478	-0.0969845	CRISPR Dependency
SMG1	0.000224649	0.120963	CRISPR Dependency
OR5L1	0.000224777	0.0799035	CRISPR Dependency
TRIM58	0.00022492	0.0751593	CRISPR Dependency
OR1N1	0.000224965	0.0607183	CRISPR Dependency
NTSR2	0.000225743	0.0882248	CRISPR Dependency
DGKE	0.000226083	0.0942849	CRISPR Dependency
GPR162	0.000228066	0.0664018	CRISPR Dependency
OR11H4	0.000228523	-0.0751421	CRISPR Dependency
RHOB	0.000229036	0.0949487	CRISPR Dependency
TSPYL1	0.000229606	0.0960731	CRISPR Dependency
MTRNR2L7	0.000229872	-0.0655088	CRISPR Dependency
TMEM115	0.00023017	0.0815105	CRISPR Dependency
FAM159B	0.000230255	0.0839493	CRISPR Dependency
RABEP1	0.000230694	0.0947685	CRISPR Dependency
RASD1	0.000230989	0.0933145	CRISPR Dependency
ANKFY1	0.000231221	0.098513	CRISPR Dependency
SPATA25	0.000231363	0.0873738	CRISPR Dependency
KRTAP4-4	0.000231632	0.0745287	CRISPR Dependency
DNMT1	0.000232502	-0.102084	CRISPR Dependency
STYX	0.000232604	0.0748697	CRISPR Dependency
SMIM14	0.000233068	-0.0694692	CRISPR Dependency
POP5	0.000233118	0.164296	CRISPR Dependency
FAM35A	0.000234713	-0.0975524	CRISPR Dependency
ITGA6	0.000234845	0.0913245	CRISPR Dependency
NEDD9	0.00023618	0.114304	CRISPR Dependency
OR2T11	0.000236483	-0.106246	CRISPR Dependency
CCDC184	0.000237211	0.100222	CRISPR Dependency
TRIM61	0.000238978	0.112757	CRISPR Dependency
TMTC3	0.000239205	0.0655606	CRISPR Dependency
NDFIP1	0.000240051	-0.0906216	CRISPR Dependency
NKX6-3	0.000240363	-0.0840545	CRISPR Dependency
PCDHA7	0.000241201	-0.0769217	CRISPR Dependency
JOSD1	0.000241437	0.103853	CRISPR Dependency
RBMS1	0.00024166	0.101727	CRISPR Dependency
CYP4F12	0.000241721	-0.0800256	CRISPR Dependency
WFDC1	0.000242133	0.0768652	CRISPR Dependency
RAB3IL1	0.000243473	-0.080997	CRISPR Dependency
SOCS4	0.00024438	0.0852284	CRISPR Dependency
LRRC8C	0.000245194	-0.0667629	CRISPR Dependency
ZCCHC4	0.000246224	0.0793541	CRISPR Dependency
TRMT12	0.000246395	0.101065	CRISPR Dependency
RABGAP1L	0.00024842	0.0659259	CRISPR Dependency
TPRKB	0.000248513	-0.150939	CRISPR Dependency
PTPRG	0.000248654	0.0958778	CRISPR Dependency
CAPN1	0.000249253	0.0910522	CRISPR Dependency
ANGPT1	0.000249658	0.0844222	CRISPR Dependency
KIF1A	0.000250381	0.0775581	CRISPR Dependency
RNPC3	0.000251682	0.194942	CRISPR Dependency
UBE4B	0.000251997	0.125422	CRISPR Dependency
HIST1H3C	0.000252285	0.107912	CRISPR Dependency
SUPT5H	0.00025259	0.143899	CRISPR Dependency
KLRC4	0.00025497	0.0753412	CRISPR Dependency
JUND	0.00025521	0.102753	CRISPR Dependency
GID4	0.000255225	0.092262	CRISPR Dependency
SEC24B	0.000255431	0.0818243	CRISPR Dependency
TUSC1	0.000255798	0.094385	CRISPR Dependency
TMEM140	0.000256147	0.0839254	CRISPR Dependency
CHST2	0.000256329	0.0784927	CRISPR Dependency
PDE7A	0.000256829	0.0832954	CRISPR Dependency
SPSB3	0.000258922	0.0877705	CRISPR Dependency
ZBTB49	0.000259833	0.084468	CRISPR Dependency
TPSAB1	0.00026019	0.0927814	CRISPR Dependency
CXCL16	0.000260285	0.0810591	CRISPR Dependency
USP17L28	0.000260438	0.0810682	CRISPR Dependency
FNDC8	0.000260476	-0.0775535	CRISPR Dependency
MLST8	0.000260733	0.16581	CRISPR Dependency
MATN1	0.000261075	0.0940729	CRISPR Dependency
ZNF746	0.000262966	0.0893025	CRISPR Dependency
GPR6	0.00026328	-0.0829487	CRISPR Dependency
ATP11AUN	0.000263579	0.0729411	CRISPR Dependency
BACE2	0.000263849	0.0880515	CRISPR Dependency
TRPM1	0.000264167	-0.090806	CRISPR Dependency
PCID2	0.000264665	-0.123785	CRISPR Dependency
TRIP6	0.000264915	-0.0984552	CRISPR Dependency
CHRNB3	0.000265837	-0.0687042	CRISPR Dependency
ARGLU1	0.000267215	0.138312	CRISPR Dependency
SLMO2	0.00026874	-0.157119	CRISPR Dependency
ANP32D	0.000268746	-0.0778076	CRISPR Dependency
SRSF5	0.000269771	0.116587	CRISPR Dependency
TRIM24	0.000270207	0.0794597	CRISPR Dependency
PRDM8	0.000272692	0.0772637	CRISPR Dependency
SAP30BP	0.00027416	0.144812	CRISPR Dependency
EXOSC1	0.000275177	0.136798	CRISPR Dependency
PHYKPL	0.000275767	0.0845589	CRISPR Dependency
CELA2B	0.000275997	0.0943408	CRISPR Dependency
DNAL4	0.000276022	-0.0789459	CRISPR Dependency
ASF1A	0.000276805	0.134456	CRISPR Dependency
ANKRD52	0.000276826	0.14509	CRISPR Dependency
PLA2G4E	0.000277023	-0.0792259	CRISPR Dependency
BRD2	0.000277349	0.183692	CRISPR Dependency
MED27	0.000278025	-0.0975759	CRISPR Dependency
PBX1	0.000279874	0.083002	CRISPR Dependency
OR5C1	0.000280256	-0.0751274	CRISPR Dependency
ARHGEF10L	0.00028078	0.0651756	CRISPR Dependency
OR1K1	0.000281075	-0.0737612	CRISPR Dependency
CREB3L3	0.000281759	-0.0825745	CRISPR Dependency
TCERG1	0.0002828	0.119853	CRISPR Dependency
PIBF1	0.000283408	0.0885385	CRISPR Dependency
MTRNR2L4	0.000283726	-0.0846055	CRISPR Dependency
TXNRD3NB	0.00028433	-0.0768822	CRISPR Dependency
PAX4	0.000284798	0.0676234	CRISPR Dependency
SLC2A13	0.000284819	0.0868512	CRISPR Dependency
DAGLB	0.000286261	0.0941774	CRISPR Dependency
GBP6	0.000286318	-0.0675537	CRISPR Dependency
C1orf74	0.00028698	0.100411	CRISPR Dependency
BZW2	0.000287387	0.0792041	CRISPR Dependency
PPARA	0.000288371	0.085255	CRISPR Dependency
NYNRIN	0.000288811	-0.0755064	CRISPR Dependency
DUSP22	0.000289183	0.109121	CRISPR Dependency
C17orf82	0.000290999	0.115277	CRISPR Dependency
IL1RL1	0.000291475	-0.068254	CRISPR Dependency
C16orf95	0.000291832	0.0998445	CRISPR Dependency
TEKT2	0.000293998	0.100619	CRISPR Dependency
SHANK1	0.000294255	-0.0882488	CRISPR Dependency
KRT24	0.00029449	0.0709977	CRISPR Dependency
PAX3	0.000294507	0.114009	CRISPR Dependency
AATK	0.000294645	0.0781898	CRISPR Dependency
CHMP4B	0.000294935	0.215383	CRISPR Dependency
ATP6V1E1	0.000295336	-0.106869	CRISPR Dependency
ALDH2	0.000295922	0.0778144	CRISPR Dependency
DBNDD1	0.000297509	0.0886196	CRISPR Dependency
RNF32	0.000297573	0.0762832	CRISPR Dependency
ROBO4	0.00029934	0.0765499	CRISPR Dependency
SLC30A4	0.000299357	0.0694319	CRISPR Dependency
ZBED8	0.000300843	0.0771334	CRISPR Dependency
ERLEC1	0.000300954	0.0880178	CRISPR Dependency
RGS12	0.000301423	0.0845791	CRISPR Dependency
FARP1	0.000303428	-0.0768205	CRISPR Dependency
D2HGDH	0.000304432	0.0803017	CRISPR Dependency
RPS9	0.000305387	0.104745	CRISPR Dependency
ANO5	0.00030569	0.0706588	CRISPR Dependency
RNF167	0.000306898	0.0721633	CRISPR Dependency
C2orf69	0.000306971	0.0878436	CRISPR Dependency
BCKDHA	0.0003081	0.0737961	CRISPR Dependency
DUSP7	0.000308788	0.0777296	CRISPR Dependency
NIPAL2	0.000309421	0.107256	CRISPR Dependency
CD53	0.000311723	-0.0771045	CRISPR Dependency
C7orf26	0.000312653	-0.133647	CRISPR Dependency
HNRNPLL	0.000312658	0.0781265	CRISPR Dependency
FOXF2	0.00031266	0.0910169	CRISPR Dependency
SLC22A12	0.000313463	-0.0783608	CRISPR Dependency
PPP4R1	0.00031612	0.091015	CRISPR Dependency
CDHR3	0.000317339	0.0756768	CRISPR Dependency
INTS3	0.00031784	0.132809	CRISPR Dependency
SDCBP2	0.000318529	0.0771931	CRISPR Dependency
CYP2C8	0.00031891	-0.0778449	CRISPR Dependency
LILRA5	0.000319024	-0.089286	CRISPR Dependency
SMEK1	0.000320397	0.118962	CRISPR Dependency
LTC4S	0.000321217	0.081672	CRISPR Dependency
ZNF546	0.000321753	-0.0660241	CRISPR Dependency
UGT2B15	0.000322032	-0.0865785	CRISPR Dependency
HSD17B11	0.000322139	0.0877644	CRISPR Dependency
HOXD8	0.000322272	0.0710685	CRISPR Dependency
CHST1	0.000322329	-0.0842941	CRISPR Dependency
IGSF11	0.000322826	0.0654506	CRISPR Dependency
TFAP2C	0.000324488	0.140513	CRISPR Dependency
OLIG1	0.00032633	0.0961244	CRISPR Dependency
GTF3A	0.000327351	0.172018	CRISPR Dependency
HLA-B	0.000327416	0.102607	CRISPR Dependency
FAM212A	0.000328609	0.0851358	CRISPR Dependency
TSEN15	0.000328874	0.0723261	CRISPR Dependency
RPE65	0.000328891	0.0920789	CRISPR Dependency
BTN1A1	0.000329766	0.0818659	CRISPR Dependency
NDUFB3	0.000330109	-0.147843	CRISPR Dependency
GAK	0.000330324	-0.143922	CRISPR Dependency
PTMS	0.00033077	0.077262	CRISPR Dependency
THADA	0.000330791	0.0728532	CRISPR Dependency
RRN3	0.000331038	0.101838	CRISPR Dependency
AMER2	0.000331725	-0.0908022	CRISPR Dependency
ARG2	0.000331879	0.0655155	CRISPR Dependency
HIST3H2A	0.000331929	0.0963535	CRISPR Dependency
CCDC159	0.000332235	-0.0772483	CRISPR Dependency
KCNK15	0.000332454	0.0875635	CRISPR Dependency
SYCP3	0.000333378	0.065273	CRISPR Dependency
GNB4	0.000335472	0.0788083	CRISPR Dependency
DUSP28	0.000335494	0.0872904	CRISPR Dependency
RDM1	0.000335543	0.0901026	CRISPR Dependency
FBLN2	0.000336037	0.0624281	CRISPR Dependency
PRSS42	0.000336869	-0.0710674	CRISPR Dependency
RITA1	0.000337209	0.0902615	CRISPR Dependency
SLC25A39	0.000337478	0.0862546	CRISPR Dependency
SEZ6	0.00033787	0.0997668	CRISPR Dependency
ABCF2	0.000337922	0.0896255	CRISPR Dependency
C15orf54	0.000338856	-0.0624369	CRISPR Dependency
HCRT	0.000339338	0.0854243	CRISPR Dependency
MYO19	0.000339456	0.0726295	CRISPR Dependency
GSDMD	0.000339752	0.107015	CRISPR Dependency
ALKBH4	0.000340477	0.0888008	CRISPR Dependency
CDHR5	0.000341202	0.0649458	CRISPR Dependency
XXYLT1	0.000341607	0.0948523	CRISPR Dependency
MGRN1	0.000342924	0.097949	CRISPR Dependency
NMB	0.000343474	0.076197	CRISPR Dependency
SPRN	0.000344699	0.0863392	CRISPR Dependency
SETD9	0.000344768	0.0874857	CRISPR Dependency
PMM1	0.000344953	0.0894514	CRISPR Dependency
ZNF559	0.000345033	-0.113908	CRISPR Dependency
NGLY1	0.000346777	0.121649	CRISPR Dependency
BOD1	0.000347296	0.0944214	CRISPR Dependency
EP400	0.000347684	0.110397	CRISPR Dependency
ZCCHC2	0.000347937	-0.105364	CRISPR Dependency
TRMT112	0.000348219	0.122144	CRISPR Dependency
TMEM263	0.000348978	0.0704917	CRISPR Dependency
KIF2B	0.000349078	-0.0729568	CRISPR Dependency
ACTA1	0.000350496	0.084402	CRISPR Dependency
WDR48	0.00035074	0.176833	CRISPR Dependency
WDR46	0.000350941	0.143528	CRISPR Dependency
FAM83F	0.000352475	-0.0800291	CRISPR Dependency
BLOC1S2	0.000353242	0.0884611	CRISPR Dependency
CCND1	0.000353243	0.284661	CRISPR Dependency
ANP32E	0.000354248	0.116235	CRISPR Dependency
PMP2	0.000354849	-0.0789965	CRISPR Dependency
PNOC	0.000354875	0.0873784	CRISPR Dependency
TRIM10	0.000356316	-0.0721835	CRISPR Dependency
OLFM4	0.000356605	-0.0971578	CRISPR Dependency
CD320	0.000357417	0.088174	CRISPR Dependency
CARS	0.000358549	-0.114074	CRISPR Dependency
RBM4	0.000358581	0.117601	CRISPR Dependency
SLC6A18	0.000358764	-0.0710047	CRISPR Dependency
MPLKIP	0.000359775	0.0835477	CRISPR Dependency
FAM178A	0.00035983	0.0910526	CRISPR Dependency
H2AFV	0.000359869	0.0995479	CRISPR Dependency
SIAH2	0.000360522	0.0908189	CRISPR Dependency
CFAP43	0.000360807	0.0679993	CRISPR Dependency
FYTTD1	0.00036105	0.0883082	CRISPR Dependency
DUSP19	0.000361141	0.0962338	CRISPR Dependency
SDC4	0.000362167	0.0712875	CRISPR Dependency
CRY1	0.000362188	0.0775779	CRISPR Dependency
GPC1	0.000362251	0.091254	CRISPR Dependency
GPR19	0.000365004	-0.0724328	CRISPR Dependency
DTD1	0.000366235	0.0821384	CRISPR Dependency
TRIM14	0.000367656	0.0841894	CRISPR Dependency
SLC1A4	0.000367788	-0.0915912	CRISPR Dependency
DOLK	0.000368475	0.156489	CRISPR Dependency
HBA1	0.000368771	0.0759532	CRISPR Dependency
ZNF800	0.000369047	0.0792204	CRISPR Dependency
BCKDK	0.000370193	0.0813174	CRISPR Dependency
TNKS2	0.000370512	0.0789477	CRISPR Dependency
USP50	0.000370678	0.0920561	CRISPR Dependency
NRBF2	0.000371011	-0.0983039	CRISPR Dependency
MDM2	0.000372626	0.261326	CRISPR Dependency
GTF2H3	0.000374211	-0.111541	CRISPR Dependency
GSE1	0.000374616	0.106683	CRISPR Dependency
SEC24A	0.000375439	-0.0972374	CRISPR Dependency
PRPF6	0.000375671	-0.106666	CRISPR Dependency
ITGA1	0.000375974	0.0777688	CRISPR Dependency
C12orf60	0.000376351	0.0802016	CRISPR Dependency
SESTD1	0.000377916	0.058879	CRISPR Dependency
C10orf90	0.000380548	0.0817995	CRISPR Dependency
ZNF785	0.000382018	0.0948085	CRISPR Dependency
PEX7	0.000383039	0.100219	CRISPR Dependency
C9orf9	0.000383414	0.0918473	CRISPR Dependency
DCLK2	0.000384146	0.0678704	CRISPR Dependency
ORAI3	0.00038444	0.0940533	CRISPR Dependency
MMP25	0.000385079	0.0894882	CRISPR Dependency
AURKA	0.000387274	-0.112336	CRISPR Dependency
SCNM1	0.000387535	0.110677	CRISPR Dependency
POU5F1	0.000388228	-0.0767422	CRISPR Dependency
AKAP7	0.000388816	0.0953393	CRISPR Dependency
CCDC114	0.000389625	-0.0977832	CRISPR Dependency
TP53	0.00038987	-0.429587	CRISPR Dependency
MLLT4	0.000390408	0.113245	CRISPR Dependency
PCDHB2	0.000390819	0.0818641	CRISPR Dependency
SSUH2	0.000391511	0.0844503	CRISPR Dependency
OR5K3	0.000391681	-0.0793824	CRISPR Dependency
TMEM33	0.00039179	0.0927528	CRISPR Dependency
SNRPD3	0.000392926	-0.105621	CRISPR Dependency
TMEM134	0.000393261	0.0850753	CRISPR Dependency
CHMP3	0.000394191	-0.198016	CRISPR Dependency
SIAH1	0.000394352	0.131485	CRISPR Dependency
ZNF333	0.000395738	-0.0911198	CRISPR Dependency
ESYT1	0.000395834	0.0806756	CRISPR Dependency
TMEM214	0.000396034	0.0846099	CRISPR Dependency
CADM2	0.000396613	0.0721119	CRISPR Dependency
TRIB2	0.000396697	0.0831463	CRISPR Dependency
NDNL2	0.000397725	0.161525	CRISPR Dependency
C8orf59	0.000398246	-0.111226	CRISPR Dependency
ADAMTSL1	0.000398612	-0.0797176	CRISPR Dependency
ARRDC1	0.000399105	0.0937542	CRISPR Dependency
AVPR1A	0.000399441	0.0859835	CRISPR Dependency
CORO2A	0.000399536	-0.0936831	CRISPR Dependency
XYLT2	0.000401482	0.12354	CRISPR Dependency
GUSB	0.000401988	0.0780513	CRISPR Dependency
NADK	0.000402195	0.0823215	CRISPR Dependency
FBXO36	0.000402997	0.083366	CRISPR Dependency
DERL1	0.000408466	0.109935	CRISPR Dependency
AES	0.000409778	-0.0852616	CRISPR Dependency
TMEM218	0.000410394	0.077228	CRISPR Dependency
MRGPRE	0.000411741	-0.113715	CRISPR Dependency
HIST1H1C	0.000413012	0.10093	CRISPR Dependency
BARD1	0.00041428	0.135087	CRISPR Dependency
SERINC1	0.000417964	0.0911201	CRISPR Dependency
ARFIP2	0.000418031	0.0864037	CRISPR Dependency
GLIS2	0.000418352	0.0923251	CRISPR Dependency
INTS8	0.000421202	-0.115834	CRISPR Dependency
AMOTL1	0.000421987	0.082502	CRISPR Dependency
RBM7	0.000422637	0.0890166	CRISPR Dependency
NUS1	0.000423875	0.120404	CRISPR Dependency
AACS	0.000425266	0.0762739	CRISPR Dependency
ZNF365	0.000425567	-0.0631066	CRISPR Dependency
GPBP1	0.000425934	0.0816157	CRISPR Dependency
SKP1	0.000427546	-0.12779	CRISPR Dependency
RPN2	0.00043065	0.127327	CRISPR Dependency
PDE1C	0.000431701	0.101022	CRISPR Dependency
CDC42	0.000431713	0.157526	CRISPR Dependency
USP12	0.000431822	-0.0728893	CRISPR Dependency
SELO	0.0004339	0.0813612	CRISPR Dependency
TPST2	0.000435188	0.0742071	CRISPR Dependency
GATA3	0.000437607	-0.136936	CRISPR Dependency
CBWD2	0.000437741	0.0907823	CRISPR Dependency
PDE4D	0.000439102	0.0819081	CRISPR Dependency
OR51A2	0.000440172	0.0742671	CRISPR Dependency
SPDL1	0.000440556	-0.104768	CRISPR Dependency
TLCD2	0.000442773	0.0771447	CRISPR Dependency
PYY	0.000444628	-0.0865341	CRISPR Dependency
FAM21A	0.000444863	0.095592	CRISPR Dependency
GPAA1	0.000445429	0.0949085	CRISPR Dependency
DSTN	0.000445619	-0.0903976	CRISPR Dependency
USP17L13	0.000446745	0.0908037	CRISPR Dependency
GLCCI1	0.000446764	0.0784534	CRISPR Dependency
HPS5	0.000449289	0.073332	CRISPR Dependency
NUTM2B	0.000450368	0.0925406	CRISPR Dependency
OR6B3	0.000452024	-0.0841782	CRISPR Dependency
ALX1	0.000452194	0.0833772	CRISPR Dependency
KIF1B	0.000453546	0.0882203	CRISPR Dependency
ICMT	0.000454717	0.113301	CRISPR Dependency
MARCKS	0.000454899	0.102137	CRISPR Dependency
FARSA	0.000455158	-0.118524	CRISPR Dependency
SLC17A9	0.000455593	0.0861849	CRISPR Dependency
TERF1	0.000455922	0.16562	CRISPR Dependency
RAMP3	0.000456986	-0.086219	CRISPR Dependency
SMIM24	0.000459563	-0.0961441	CRISPR Dependency
ZNF98	0.000459574	-0.080569	CRISPR Dependency
DOCK8	0.000460669	0.064749	CRISPR Dependency
RB1	0.0004617	-0.137256	CRISPR Dependency
DHRS7B	0.000462669	0.103483	CRISPR Dependency
CLECL1	0.000463766	-0.0962977	CRISPR Dependency
FBXO22	0.000466672	0.0966604	CRISPR Dependency
ZNF431	0.00046749	-0.0716773	CRISPR Dependency
BACH1	0.000468078	0.0887343	CRISPR Dependency
ACTRT2	0.000471924	-0.0710892	CRISPR Dependency
FERMT3	0.000472203	0.0759561	CRISPR Dependency
KLHDC8B	0.000472976	0.0609189	CRISPR Dependency
PRDM14	0.000473083	0.0910063	CRISPR Dependency
PCSK7	0.000473598	0.0821736	CRISPR Dependency
OR1L6	0.000474042	0.0879452	CRISPR Dependency
PIGP	0.000475712	0.0907768	CRISPR Dependency
IL11RA	0.000477004	-0.0805721	CRISPR Dependency
SDHAF2	0.000478059	-0.10383	CRISPR Dependency
RNASE12	0.00047994	-0.062603	CRISPR Dependency
SEPW1	0.000480053	0.108408	CRISPR Dependency
THOC5	0.000481527	-0.115898	CRISPR Dependency
ATP6V1B2	0.000481611	0.18225	CRISPR Dependency
MPZ	0.000486371	-0.0680448	CRISPR Dependency
NSMAF	0.000489525	0.0796712	CRISPR Dependency
ITPR1	0.000489751	0.084438	CRISPR Dependency
NT5M	0.000489934	0.0849484	CRISPR Dependency
SMOC2	0.000490367	0.0696981	CRISPR Dependency
MROH6	0.000491398	0.0886908	CRISPR Dependency
WNT6	0.000492073	0.0750923	CRISPR Dependency
PECR	0.000494021	0.0721455	CRISPR Dependency
ANKRD54	0.000494807	0.0899795	CRISPR Dependency
SOX9	0.000495951	0.152567	CRISPR Dependency
ATP1B2	0.000496538	-0.0887452	CRISPR Dependency
ADPRHL1	0.000497555	-0.0815118	CRISPR Dependency
KIAA2013	0.000498046	0.0963958	CRISPR Dependency
PRR22	0.000499776	-0.0904241	CRISPR Dependency
SLC25A2	0.000499931	-0.0612604	CRISPR Dependency
EQTN	0.000501362	-0.0981263	CRISPR Dependency
SMAD9	0.000501677	0.080672	CRISPR Dependency
MSLN	0.000501769	-0.0649584	CRISPR Dependency
MYO7A	0.000501849	-0.0804287	CRISPR Dependency
GNG4	0.000502367	0.0725477	CRISPR Dependency
ULK3	0.000504706	0.0782342	CRISPR Dependency
PPIL3	0.000505185	0.0768305	CRISPR Dependency
ZNF880	0.000505894	-0.0774082	CRISPR Dependency
PLEC	0.000506581	0.093962	CRISPR Dependency
MYLPF	0.000508966	-0.0701947	CRISPR Dependency
ACBD5	0.000509577	0.0895313	CRISPR Dependency
HSPA1L	0.000510262	-0.0770439	CRISPR Dependency
TAF15	0.000513394	0.0819686	CRISPR Dependency
HLA-DMB	0.000513829	-0.0649849	CRISPR Dependency
MSRB3	0.000514803	0.0681773	CRISPR Dependency
ZNF672	0.000515001	0.0686315	CRISPR Dependency
ADAMTS17	0.000518902	0.0617194	CRISPR Dependency
C1orf101	0.000524056	0.0703679	CRISPR Dependency
C9orf85	0.000524902	0.0715714	CRISPR Dependency
GPR151	0.000525761	0.0840452	CRISPR Dependency
RELA	0.000526026	0.122082	CRISPR Dependency
MRI1	0.000526302	0.0812211	CRISPR Dependency
GLI4	0.000526581	0.0892435	CRISPR Dependency
SLMO1	0.000529368	0.0840368	CRISPR Dependency
FBXO28	0.000530416	0.0982615	CRISPR Dependency
RMI2	0.000530467	0.111684	CRISPR Dependency
TRAPPC11	0.000531087	-0.115147	CRISPR Dependency
PAQR4	0.000532693	0.0857386	CRISPR Dependency
CDRT15L2	0.000534755	-0.0945876	CRISPR Dependency
QRICH1	0.000535967	0.113531	CRISPR Dependency
GAA	0.000536157	-0.0853623	CRISPR Dependency
ZNF776	0.000536561	-0.0737865	CRISPR Dependency
CACNA1C	0.00053739	0.0729154	CRISPR Dependency
FBXO44	0.000537716	0.0690865	CRISPR Dependency
LILRB4	0.000538089	-0.0766181	CRISPR Dependency
NT5C	0.000539514	0.0996133	CRISPR Dependency
HIST4H4	0.000539916	0.0750808	CRISPR Dependency
TMEM229A	0.000540627	0.0671547	CRISPR Dependency
C19orf67	0.000542146	-0.0898224	CRISPR Dependency
ELOVL6	0.000543079	0.0766985	CRISPR Dependency
RGMA	0.000545473	-0.0826325	CRISPR Dependency
HNRNPU	0.000545624	0.126531	CRISPR Dependency
CNPY3	0.000545828	-0.0652116	CRISPR Dependency
BORA	0.000548723	-0.109427	CRISPR Dependency
ZNF668	0.000550823	0.0866011	CRISPR Dependency
TOR2A	0.000551813	0.0961652	CRISPR Dependency
ID3	0.000552066	0.0892874	CRISPR Dependency
GLUD1	0.000552171	0.0825258	CRISPR Dependency
TOP1	0.00055345	-0.148235	CRISPR Dependency
C11orf30	0.000555905	0.148147	CRISPR Dependency
PTPLB	0.000556682	0.0829934	CRISPR Dependency
NUPL1	0.000557608	-0.114755	CRISPR Dependency
PRAMEF10	0.000557998	-0.0838249	CRISPR Dependency
ABHD13	0.0005589	0.110115	CRISPR Dependency
OMG	0.000560232	0.0645317	CRISPR Dependency
LARGE	0.00056118	0.0659127	CRISPR Dependency
GGT1	0.000562968	0.120296	CRISPR Dependency
UTS2	0.000563727	-0.0786018	CRISPR Dependency
FAM25A	0.000564271	-0.149893	CRISPR Dependency
C4orf26	0.000565423	-0.0702768	CRISPR Dependency
NCAM2	0.000566693	0.0642443	CRISPR Dependency
DCLRE1B	0.000567406	0.199276	CRISPR Dependency
OCM	0.000568295	-0.0947788	CRISPR Dependency
RPS5	0.000569417	0.110989	CRISPR Dependency
PDIK1L	0.000570103	0.0703791	CRISPR Dependency
PPP1R2	0.000571771	0.164604	CRISPR Dependency
ARHGAP32	0.000571928	-0.0716639	CRISPR Dependency
MARK1	0.0005721	0.0743741	CRISPR Dependency
NEMF	0.000573345	0.1123	CRISPR Dependency
CISD3	0.000575952	0.0900741	CRISPR Dependency
HRK	0.000580488	0.0861921	CRISPR Dependency
ATXN10	0.000583935	-0.119995	CRISPR Dependency
RAB15	0.000584758	0.0759996	CRISPR Dependency
MRPL52	0.000585968	-0.105337	CRISPR Dependency
MRPL30	0.000586622	-0.115564	CRISPR Dependency
HIST1H2AL	0.00058699	0.0832452	CRISPR Dependency
SCUBE2	0.000588027	0.068053	CRISPR Dependency
PRND	0.000588202	-0.0644488	CRISPR Dependency
FAM175B	0.000589071	-0.112276	CRISPR Dependency
COMMD10	0.000589542	0.0802916	CRISPR Dependency
BRD1	0.000589841	0.1255	CRISPR Dependency
ZNF250	0.000592056	0.078903	CRISPR Dependency
BAK1	0.000593623	-0.10775	CRISPR Dependency
OAS1	0.000594034	0.0623225	CRISPR Dependency
C1orf95	0.000594422	0.0693143	CRISPR Dependency
MUC16	0.000594993	-0.0784901	CRISPR Dependency
CEBPB	0.000595382	0.131239	CRISPR Dependency
EIF2B1	0.000596912	-0.117098	CRISPR Dependency
PLA2G2D	0.000599357	-0.0702463	CRISPR Dependency
APBB1	0.000599982	-0.0771771	CRISPR Dependency
VPS41	0.000602131	0.133279	CRISPR Dependency
NECAP1	0.000604276	0.0712604	CRISPR Dependency
TRIM45	0.000604532	0.0923802	CRISPR Dependency
EXOSC8	0.000606114	0.136537	CRISPR Dependency
C6	0.000606233	-0.0711823	CRISPR Dependency
BTF3	0.000606468	-0.122407	CRISPR Dependency
SLC15A4	0.000607487	0.0860344	CRISPR Dependency
ABCA13	0.000608046	0.073859	CRISPR Dependency
PHKB	0.00060854	0.0817952	CRISPR Dependency
PCMTD2	0.000608802	0.0885687	CRISPR Dependency
DDRGK1	0.000610618	0.103168	CRISPR Dependency
ZBTB42	0.000610726	0.0686071	CRISPR Dependency
GBA2	0.00061226	0.0654112	CRISPR Dependency
CLDN9	0.00061354	0.0873803	CRISPR Dependency
HIST1H2BK	0.000614536	0.105531	CRISPR Dependency
PGP	0.000614817	0.121042	CRISPR Dependency
SOS2	0.000615388	0.0723841	CRISPR Dependency
AGL	0.000617509	0.0703757	CRISPR Dependency
LRRC58	0.000618201	0.0656261	CRISPR Dependency
C8orf58	0.000618604	0.0688558	CRISPR Dependency
NSUN4	0.000619007	-0.137062	CRISPR Dependency
FRG1	0.000619497	0.111621	CRISPR Dependency
DBNL	0.000620199	0.0753662	CRISPR Dependency
[truncated: 111,830 more rows]

## Sheet: S4 RNAi associations
Gene	p.value	EffectSize	Type
TJP1	4.93801e-08	0.15845	RNAi Dependency
DPYD	5.40386e-08	0.143318	RNAi Dependency
SCAND2P	1.03116e-06	0.149219	RNAi Dependency
HIF1A	3.01398e-06	-0.141685	RNAi Dependency
SCN4A	4.70262e-06	0.147372	RNAi Dependency
OR1L6	7.28118e-06	-0.142552	RNAi Dependency
SOX10	1.48328e-05	0.176763	RNAi Dependency
ARNT	1.76828e-05	-0.208606	RNAi Dependency
MRPL49	2.04676e-05	-0.15129	RNAi Dependency
ZNF37A	2.21832e-05	-0.111912	RNAi Dependency
AGAP6	5.58391e-05	0.109677	RNAi Dependency
SLC24A1	5.98596e-05	0.116559	RNAi Dependency
OR2T5	6.7318e-05	-0.0901764	RNAi Dependency
CASP9	7.75997e-05	-0.120252	RNAi Dependency
MASP1	8.00865e-05	0.145698	RNAi Dependency
CTTN	8.07361e-05	0.0861309	RNAi Dependency
TM7SF3	8.47476e-05	-0.18282	RNAi Dependency
SMG1P2	8.67366e-05	0.09231	RNAi Dependency
ZNF19	9.51174e-05	0.121052	RNAi Dependency
HSPB8	9.67164e-05	0.110747	RNAi Dependency
CRYBA1	9.76986e-05	0.136638	RNAi Dependency
GATA3	0.000103719	-0.130865	RNAi Dependency
CHST10	0.000108503	-0.0957035	RNAi Dependency
SF3A1	0.000113973	-0.180408	RNAi Dependency
LSMEM2	0.000118295	0.138182	RNAi Dependency
TBCB	0.00012487	0.160185	RNAi Dependency
POU3F4	0.000142549	-0.110385	RNAi Dependency
ABCG1	0.000155122	0.151618	RNAi Dependency
AKAP9	0.000164065	-0.0809034	RNAi Dependency
PAH	0.00016925	-0.0974613	RNAi Dependency
NFIL3	0.000175482	-0.101818	RNAi Dependency
TPX2	0.000179055	-0.152222	RNAi Dependency
COA1	0.000186079	0.160701	RNAi Dependency
HIST1H2BK	0.000193775	0.0775211	RNAi Dependency
SPIC	0.000206392	-0.0977747	RNAi Dependency
THY1	0.000218591	0.122672	RNAi Dependency
NECTIN4	0.000219753	0.091734	RNAi Dependency
ZBTB3	0.000225433	0.109351	RNAi Dependency
PEA15	0.000228488	0.10252	RNAi Dependency
HELZ	0.000229531	-0.138149	RNAi Dependency
MCM8	0.000229838	0.0963248	RNAi Dependency
MYL4	0.000231579	0.105798	RNAi Dependency
AQP11	0.000237444	0.0805825	RNAi Dependency
DCP2	0.000240538	-0.119847	RNAi Dependency
CCDC174	0.000247556	-0.160925	RNAi Dependency
SPINK5	0.000250724	-0.0867356	RNAi Dependency
SPP1	0.000267824	-0.118107	RNAi Dependency
GUF1	0.000276349	-0.146203	RNAi Dependency
METTL9	0.000296234	-0.134746	RNAi Dependency
CRELD2	0.000303183	-0.0937819	RNAi Dependency
QSER1	0.0003124	0.115658	RNAi Dependency
TCAIM	0.000361478	0.147043	RNAi Dependency
LOXL2	0.00037518	-0.0906583	RNAi Dependency
LSM8	0.000375461	-0.137456	RNAi Dependency
MEF2D	0.000381552	0.126818	RNAi Dependency
LRFN1	0.000384602	0.0989855	RNAi Dependency
ERGIC1	0.000420126	-0.078207	RNAi Dependency
RNPEPL1	0.000439598	0.0958742	RNAi Dependency
ZNF639	0.000452468	-0.116818	RNAi Dependency
PPT2-EGFL8	0.000463918	-0.0847588	RNAi Dependency
RAB2B	0.000466183	0.0881816	RNAi Dependency
LOC110117498-PIK3R3	0.000467742	-0.0793401	RNAi Dependency
IRF5	0.000476924	0.100376	RNAi Dependency
AZU1	0.00048675	-0.0953622	RNAi Dependency
LOC102723917&RPL23AP7&RPL23AP82&RPL23AP87	0.00049426	0.10896	RNAi Dependency
C12orf49	0.000507718	0.101971	RNAi Dependency
SUMO1	0.000559351	0.134795	RNAi Dependency
SOAT2	0.00056162	0.110709	RNAi Dependency
EN1	0.000575723	0.106977	RNAi Dependency
NMRK2	0.000596307	-0.145259	RNAi Dependency
SLC39A1	0.00060809	0.0898711	RNAi Dependency
LRRK2	0.000628077	-0.0971	RNAi Dependency
NELL1	0.000640068	-0.0857627	RNAi Dependency
SMYD2	0.000677811	0.139491	RNAi Dependency
SPINK1	0.00069512	0.0923108	RNAi Dependency
PLEKHO1	0.00071177	-0.15438	RNAi Dependency
CTAGE1	0.000716722	0.0816286	RNAi Dependency
RHBDL1	0.000756657	-0.073797	RNAi Dependency
PYM1	0.000769329	0.130261	RNAi Dependency
BCDIN3D	0.000797253	0.122892	RNAi Dependency
PRAF2	0.000802818	0.11156	RNAi Dependency
ABHD6	0.00082623	-0.135169	RNAi Dependency
COL4A5	0.000857486	-0.0947874	RNAi Dependency
REXO1L5P	0.000858651	0.0948465	RNAi Dependency
CCDC186	0.000859956	-0.123932	RNAi Dependency
STEAP4	0.000871887	-0.109442	RNAi Dependency
GPR19	0.00087729	-0.0869122	RNAi Dependency
ELAC1	0.000888663	0.0918452	RNAi Dependency
RPP38	0.000891752	0.166609	RNAi Dependency
PTPN13	0.000916845	-0.0917295	RNAi Dependency
STRAP	0.000920203	-0.140859	RNAi Dependency
CYLC2	0.000935585	-0.164927	RNAi Dependency
SLC2A10	0.000942186	0.0936798	RNAi Dependency
ASPRV1	0.000960018	0.106598	RNAi Dependency
XRCC2	0.000964718	-0.0821466	RNAi Dependency
CYSLTR1	0.000967527	-0.075651	RNAi Dependency
ATP5J2	0.001017	-0.113547	RNAi Dependency
SOX13	0.00102874	-0.0897955	RNAi Dependency
ABRAXAS2	0.00105076	-0.144037	RNAi Dependency
MPDZ	0.00105321	-0.144571	RNAi Dependency
MAP2K5	0.00110991	0.0832654	RNAi Dependency
DYNC2LI1	0.00112467	-0.12391	RNAi Dependency
CPSF2	0.00114494	-0.0969044	RNAi Dependency
TCF12	0.0011457	0.101265	RNAi Dependency
EPHX1	0.00118282	-0.104544	RNAi Dependency
FAM168B	0.00120692	-0.117588	RNAi Dependency
OXSR1	0.00122428	0.0854937	RNAi Dependency
SELP	0.00122697	-0.0884679	RNAi Dependency
ZMYM4	0.00123835	-0.156875	RNAi Dependency
TMEM86A	0.00124739	-0.118531	RNAi Dependency
NAA38	0.00127501	-0.117689	RNAi Dependency
PAX9	0.00129279	-0.107748	RNAi Dependency
B3GLCT	0.00131932	-0.132537	RNAi Dependency
POLR1C	0.00135101	-0.0906125	RNAi Dependency
DUSP22	0.00136604	-0.0941838	RNAi Dependency
FIBCD1	0.00137225	-0.0955362	RNAi Dependency
SAMD1	0.00141	-0.140772	RNAi Dependency
LIMS1	0.00143671	0.0927823	RNAi Dependency
ENC1	0.00144259	-0.0954873	RNAi Dependency
MAIP1	0.00150095	-0.134095	RNAi Dependency
ATP5I	0.00150377	-0.119113	RNAi Dependency
NEUROD1	0.00151215	0.0992658	RNAi Dependency
LY96	0.00152292	0.0889751	RNAi Dependency
SERPING1	0.00153221	-0.0950438	RNAi Dependency
VCPIP1	0.00154991	-0.0832267	RNAi Dependency
SYT16	0.00155133	-0.132083	RNAi Dependency
ARG2	0.00155219	-0.0894315	RNAi Dependency
ATG4C	0.00158301	-0.106257	RNAi Dependency
HIST1H4K&HIST1H4J	0.00160479	-0.0796663	RNAi Dependency
GALK1	0.00166613	0.0926479	RNAi Dependency
FBXL19	0.00168266	-0.098838	RNAi Dependency
CD300C	0.00170966	0.0708341	RNAi Dependency
KLHL21	0.00174627	0.112003	RNAi Dependency
MAGEE2	0.00174714	0.105186	RNAi Dependency
KCTD6	0.00174868	0.069168	RNAi Dependency
KISS1	0.00175434	-0.092149	RNAi Dependency
KIF19	0.00176352	0.124187	RNAi Dependency
SLC52A1	0.00177733	-0.0798228	RNAi Dependency
SPAG11B	0.00179317	0.142744	RNAi Dependency
WASH3P	0.00182276	0.12395	RNAi Dependency
ECD	0.00184573	-0.116082	RNAi Dependency
BPIFA1	0.00185025	-0.0949333	RNAi Dependency
TKT	0.00188367	-0.0935247	RNAi Dependency
TPMT	0.00190373	0.070926	RNAi Dependency
GK3P	0.00194187	0.0912561	RNAi Dependency
GAD1	0.00194779	0.0834956	RNAi Dependency
EGFL6	0.001956	-0.101722	RNAi Dependency
SPATA7	0.00197371	0.136482	RNAi Dependency
RYR3	0.00199554	-0.0787629	RNAi Dependency
TNFSF13B	0.00199952	-0.0859769	RNAi Dependency
WDR26	0.00200047	-0.153793	RNAi Dependency
CDC25C	0.00202128	0.0997771	RNAi Dependency
TMEM144	0.00203886	0.132335	RNAi Dependency
IGF2BP1	0.00209881	-0.0801174	RNAi Dependency
PFKFB4	0.00212708	-0.0753584	RNAi Dependency
ZNF264	0.00214847	0.0886319	RNAi Dependency
MRPL16	0.00215657	-0.135437	RNAi Dependency
NDUFS3	0.00215776	-0.0967346	RNAi Dependency
OR56A1	0.00216582	-0.0713008	RNAi Dependency
RAD9A	0.0021667	0.0844913	RNAi Dependency
KIT	0.00216783	-0.0762846	RNAi Dependency
SFMBT2	0.00217066	0.121614	RNAi Dependency
NPC1	0.00217446	-0.0837773	RNAi Dependency
DDAH2	0.00221309	-0.0855761	RNAi Dependency
EHHADH	0.00222884	-0.0855202	RNAi Dependency
PCDHGB3	0.00223102	-0.103546	RNAi Dependency
TMSB15A	0.00224937	0.110749	RNAi Dependency
CD74	0.00225322	0.0703877	RNAi Dependency
GPR65	0.00229887	-0.0821038	RNAi Dependency
SH2D1B	0.00230167	-0.0897222	RNAi Dependency
FBXO27	0.00234105	-0.0771138	RNAi Dependency
ERAP2	0.00235302	-0.0878656	RNAi Dependency
PLOD2	0.00235963	0.0877818	RNAi Dependency
SNX10	0.00237831	0.101504	RNAi Dependency
LSM6	0.00238683	-0.165892	RNAi Dependency
MYO10	0.00240948	0.121685	RNAi Dependency
RIOK3	0.00242427	-0.0813928	RNAi Dependency
WDR34	0.00243851	0.166623	RNAi Dependency
DNAH7	0.0024554	0.111991	RNAi Dependency
PHF21B	0.0024623	-0.0806155	RNAi Dependency
AZI2	0.00246258	0.0800621	RNAi Dependency
ATIC	0.00246361	-0.0949564	RNAi Dependency
NOTCH1	0.00250937	-0.0789854	RNAi Dependency
KCMF1	0.00251333	-0.10939	RNAi Dependency
CD69	0.00260827	0.0790445	RNAi Dependency
G6PC3	0.00260925	-0.12148	RNAi Dependency
RPL22	0.00261145	0.105987	RNAi Dependency
C11orf71	0.00262331	0.0872834	RNAi Dependency
CTAGE11P	0.00268365	-0.0651999	RNAi Dependency
STK32C	0.00269601	0.0762353	RNAi Dependency
NOD2	0.00270981	0.0659966	RNAi Dependency
ZNF518A	0.0027103	-0.116465	RNAi Dependency
MSL2	0.0027253	-0.0952427	RNAi Dependency
PTENP1	0.00275527	0.0971732	RNAi Dependency
NHEJ1	0.00279605	0.0834859	RNAi Dependency
C8orf34	0.00287824	-0.103219	RNAi Dependency
FAM155B	0.00289751	0.10541	RNAi Dependency
ENPEP	0.00289837	0.105577	RNAi Dependency
TRIM55	0.0029596	-0.0714287	RNAi Dependency
TAC1	0.00297774	0.104817	RNAi Dependency
CSN2	0.00299155	-0.0693342	RNAi Dependency
SUCO	0.0030253	0.0639471	RNAi Dependency
TRMT13	0.00304492	-0.0866259	RNAi Dependency
ZNF552	0.00306547	0.0709598	RNAi Dependency
SLTM	0.00307982	-0.150806	RNAi Dependency
BAIAP2-AS1	0.00308548	-0.111373	RNAi Dependency
NT5DC2	0.00309425	-0.127974	RNAi Dependency
MUSK	0.00310654	-0.10146	RNAi Dependency
ZNF473	0.00312016	-0.0571499	RNAi Dependency
SPHK2	0.00312794	-0.0779621	RNAi Dependency
HIST1H2AM	0.00314925	0.0877785	RNAi Dependency
PLET1	0.00314982	-0.119056	RNAi Dependency
MAPRE2	0.00315772	0.112101	RNAi Dependency
CD164	0.00317212	-0.0984123	RNAi Dependency
MRPL45	0.00319258	-0.10299	RNAi Dependency
MARK1	0.00324282	-0.0708335	RNAi Dependency
GPR141	0.00325798	-0.0829174	RNAi Dependency
COX15	0.00326871	-0.0755422	RNAi Dependency
CTSC	0.00327729	0.0986746	RNAi Dependency
CNOT10	0.0032848	-0.173309	RNAi Dependency
TSSC4	0.00336079	0.100786	RNAi Dependency
PGRMC2	0.00339404	-0.092476	RNAi Dependency
SCGB1A1	0.00340509	-0.0802398	RNAi Dependency
ABHD12B	0.00341338	-0.0766749	RNAi Dependency
TMEM9B	0.0034455	0.0973511	RNAi Dependency
VARS	0.00345148	-0.129758	RNAi Dependency
ATP12A	0.0034619	-0.0861484	RNAi Dependency
CPXM2	0.00349003	0.0695119	RNAi Dependency
GPR18	0.00350743	-0.0748524	RNAi Dependency
CAPRIN2	0.00350992	-0.116753	RNAi Dependency
ATP5J	0.00351159	-0.0887507	RNAi Dependency
CD70	0.00352907	0.0831588	RNAi Dependency
YWHAB	0.00353151	0.0709609	RNAi Dependency
MPZL2	0.00355898	0.112596	RNAi Dependency
ZNF185	0.00356426	0.0704349	RNAi Dependency
PHF2	0.00356882	-0.0839521	RNAi Dependency
POTEKP	0.00357493	-0.104239	RNAi Dependency
PMM1	0.0036291	-0.0867441	RNAi Dependency
ACTG1	0.00362971	-0.0980242	RNAi Dependency
KIF2A	0.00363002	0.097759	RNAi Dependency
C8orf37	0.00367017	-0.128511	RNAi Dependency
EXOSC1	0.00368506	0.113675	RNAi Dependency
SPRY2	0.00370984	-0.0828272	RNAi Dependency
CRB1	0.00371039	0.0673826	RNAi Dependency
LRRC3	0.00371343	-0.111655	RNAi Dependency
TNS3	0.0037306	0.0976134	RNAi Dependency
MYNN	0.00375507	-0.0831057	RNAi Dependency
TGM1	0.00375929	0.086342	RNAi Dependency
KIAA0556	0.00376062	0.120759	RNAi Dependency
PCDHGA10	0.00378408	-0.0773452	RNAi Dependency
ZSCAN12	0.00379382	-0.0888235	RNAi Dependency
UQCRB	0.00380315	-0.103739	RNAi Dependency
BEST2	0.00380645	-0.104786	RNAi Dependency
RAB40AL	0.00385022	-0.10104	RNAi Dependency
TBC1D31	0.00388634	0.110008	RNAi Dependency
TOM1	0.00391149	0.0817971	RNAi Dependency
USP20	0.00391293	0.070969	RNAi Dependency
BRPF3	0.00391574	0.0742688	RNAi Dependency
SCYL1	0.00395042	-0.0793642	RNAi Dependency
CLIC5	0.00397059	-0.0916363	RNAi Dependency
ATP6V1E1	0.00398608	-0.113385	RNAi Dependency
PTPRD	0.00399306	-0.0814814	RNAi Dependency
BTK	0.00401556	0.104526	RNAi Dependency
CREB3L1	0.00401736	0.0778725	RNAi Dependency
YAP1	0.0040199	-0.11833	RNAi Dependency
DBET	0.00402726	-0.0957136	RNAi Dependency
TMC5	0.00403292	-0.0768911	RNAi Dependency
RC3H2	0.00409364	0.0718079	RNAi Dependency
SENP7	0.00409812	-0.0921587	RNAi Dependency
CTSH	0.00411593	0.0815594	RNAi Dependency
SLC30A7	0.00415883	0.0723641	RNAi Dependency
CNOT8	0.00416897	-0.089974	RNAi Dependency
KIF12	0.00416939	0.0893936	RNAi Dependency
C12orf66	0.00419282	-0.110518	RNAi Dependency
CAMKK1	0.0042019	-0.113501	RNAi Dependency
ECEL1	0.00422376	-0.0761273	RNAi Dependency
MAPK1	0.00429719	0.121949	RNAi Dependency
CCBE1	0.00430765	0.067151	RNAi Dependency
COMT	0.0043228	-0.0779008	RNAi Dependency
SCARB1	0.00436402	0.0827295	RNAi Dependency
ASB10	0.00438955	-0.112385	RNAi Dependency
PROSER2	0.00439299	0.126853	RNAi Dependency
SULT1C4	0.00439945	-0.0741429	RNAi Dependency
GSDMB	0.00441453	0.131658	RNAi Dependency
PPAN	0.00441902	0.0929159	RNAi Dependency
RWDD2A	0.00443299	0.0776448	RNAi Dependency
DMRTB1	0.00443804	0.0792469	RNAi Dependency
C2orf49	0.0044401	-0.0713655	RNAi Dependency
HIST1H2BE	0.00445307	0.106151	RNAi Dependency
PLCE1	0.00445382	0.0764593	RNAi Dependency
NUP50	0.00445531	-0.129718	RNAi Dependency
ADSL	0.00448206	-0.149237	RNAi Dependency
SULF2	0.00451547	-0.077329	RNAi Dependency
NKX2-1	0.00458772	0.0825332	RNAi Dependency
SLC38A1	0.00459822	-0.075074	RNAi Dependency
BPNT1	0.004619	-0.0637471	RNAi Dependency
2019-03-10	0.00462352	0.0692433	RNAi Dependency
CYP2C19	0.00466925	0.088719	RNAi Dependency
BOK	0.0046978	-0.0783607	RNAi Dependency
TIGD3	0.00472452	-0.0865221	RNAi Dependency
TGOLN2	0.00472778	-0.161236	RNAi Dependency
XAGE1E&XAGE1B	0.0047388	-0.0950448	RNAi Dependency
ATRAID	0.0047744	-0.133025	RNAi Dependency
LOC494141	0.00478087	-0.0825982	RNAi Dependency
IMPAD1	0.00480487	-0.0873395	RNAi Dependency
PAK2	0.0048064	0.106193	RNAi Dependency
TNFSF11	0.00481755	-0.0748845	RNAi Dependency
C4BPB	0.00484642	-0.074894	RNAi Dependency
ATF6	0.0049006	0.0741378	RNAi Dependency
ZFPM1	0.00492577	-0.0735406	RNAi Dependency
ABCA10	0.00492928	-0.0697467	RNAi Dependency
CHFR	0.00493554	0.0688421	RNAi Dependency
NONO	0.00494339	0.0862377	RNAi Dependency
P2RY1	0.0049445	-0.0731282	RNAi Dependency
UBE2NL	0.00495221	-0.135713	RNAi Dependency
HNF4G	0.00495406	-0.082813	RNAi Dependency
CDC14B	0.0049708	-0.0793761	RNAi Dependency
CCR4	0.00497107	-0.0951034	RNAi Dependency
OPRD1	0.00498781	-0.0802756	RNAi Dependency
RNASEH1	0.00499067	-0.0795787	RNAi Dependency
OR2T35	0.00501687	0.0642546	RNAi Dependency
GYS2	0.00511606	-0.0650717	RNAi Dependency
CXADR	0.00513357	0.0567925	RNAi Dependency
SLC16A7	0.00513496	-0.106926	RNAi Dependency
POP5	0.00514873	0.0958468	RNAi Dependency
ATM	0.00516812	0.0789027	RNAi Dependency
HOXB13	0.00519839	0.082896	RNAi Dependency
TBL1XR1	0.00524075	-0.0845529	RNAi Dependency
PATE1	0.00527026	-0.0830593	RNAi Dependency
HIST1H2AC	0.00527566	0.10389	RNAi Dependency
BVES	0.00529254	-0.102832	RNAi Dependency
LOC653513	0.00529541	-0.0802277	RNAi Dependency
RIF1	0.00533118	-0.156044	RNAi Dependency
DUS3L	0.00536493	-0.0676915	RNAi Dependency
SLC26A5	0.00537114	0.0989598	RNAi Dependency
ARHGEF7	0.00541058	0.0749323	RNAi Dependency
HEXB	0.0054491	0.0678633	RNAi Dependency
TNRC6C	0.00551977	0.0781164	RNAi Dependency
ARHGEF25	0.00555199	-0.0689034	RNAi Dependency
POPDC2	0.00557161	0.112774	RNAi Dependency
PIR	0.00557622	0.07204	RNAi Dependency
FABP1	0.00559275	0.0604621	RNAi Dependency
ARHGEF3	0.00560759	0.0742711	RNAi Dependency
ST6GAL2	0.00561544	0.090531	RNAi Dependency
TMEM38B	0.00562649	-0.114473	RNAi Dependency
SLC6A17	0.00564519	-0.0665558	RNAi Dependency
CDH22	0.00565094	0.0578115	RNAi Dependency
EPM2AIP1	0.00567996	0.0994487	RNAi Dependency
HSD11B1L	0.00568294	-0.0858542	RNAi Dependency
TTC23	0.00568743	0.0837581	RNAi Dependency
VCP	0.00570966	0.143686	RNAi Dependency
CNGA3	0.00575418	-0.0828511	RNAi Dependency
IRF2BP2	0.00576314	-0.0949187	RNAi Dependency
RFX4	0.00576601	0.0689417	RNAi Dependency
P2RX6	0.00576782	-0.0734703	RNAi Dependency
RTL3	0.00578132	-0.107589	RNAi Dependency
RPAP1	0.00581377	-0.14668	RNAi Dependency
ISCU	0.00586669	0.118118	RNAi Dependency
PPP1R12C	0.00586896	-0.0677004	RNAi Dependency
TRPM4	0.00587261	-0.0779678	RNAi Dependency
CDY1B&CDY1	0.0058948	-0.0859516	RNAi Dependency
BACH2	0.005934	-0.0682626	RNAi Dependency
KYNU	0.00595522	-0.071914	RNAi Dependency
KBTBD2	0.00597509	0.128893	RNAi Dependency
OR51B4	0.00597899	-0.0819023	RNAi Dependency
PSMB7	0.005997	0.101634	RNAi Dependency
POLQ	0.00606	0.0809277	RNAi Dependency
IDH3G	0.00611824	-0.0614076	RNAi Dependency
SP100	0.0061201	0.0833847	RNAi Dependency
ZNF195	0.00614163	0.0874765	RNAi Dependency
MRPL13	0.00616571	-0.115246	RNAi Dependency
PART1	0.00617369	-0.118521	RNAi Dependency
RCAN2	0.00621789	0.0777843	RNAi Dependency
ADGRE2	0.00625254	0.063826	RNAi Dependency
ABLIM2	0.00636722	-0.089992	RNAi Dependency
SLC39A11	0.00637072	0.0869687	RNAi Dependency
2019-03-06	0.00645358	0.122129	RNAi Dependency
PER3	0.00647446	-0.0993574	RNAi Dependency
FBXW4	0.00648196	-0.0830006	RNAi Dependency
CARD9	0.00649229	0.0910214	RNAi Dependency
ADGRD1	0.00649547	-0.0941867	RNAi Dependency
CA2	0.00650222	-0.0937771	RNAi Dependency
SLC30A6	0.00655332	0.0626048	RNAi Dependency
THOC6	0.00657748	-0.101065	RNAi Dependency
WNT1	0.00660243	0.0636153	RNAi Dependency
BMP1	0.00671832	0.0689259	RNAi Dependency
TBK1	0.00673173	0.0766889	RNAi Dependency
MICAL2	0.00673858	-0.0784029	RNAi Dependency
PCDHB13	0.00674497	0.0753106	RNAi Dependency
HLA-E	0.0067556	0.082356	RNAi Dependency
MORN2	0.00679908	-0.130733	RNAi Dependency
NXPH1	0.00683563	0.11705	RNAi Dependency
GPD1L	0.00686195	-0.0747431	RNAi Dependency
CD1E	0.00688483	-0.0603936	RNAi Dependency
SIK2	0.00689888	-0.0664549	RNAi Dependency
CCDC18	0.00693966	-0.0787563	RNAi Dependency
ARL15	0.00697865	0.0669713	RNAi Dependency
DSCC1	0.00698713	0.0934837	RNAi Dependency
LAPTM4B	0.00701645	0.0931371	RNAi Dependency
LAMA3	0.00702468	-0.0771675	RNAi Dependency
IMPDH2	0.00703526	-0.106618	RNAi Dependency
2019-03-05	0.00705468	-0.0755955	RNAi Dependency
MCTP1	0.00705907	0.07612	RNAi Dependency
PFDN2	0.00706111	-0.16224	RNAi Dependency
GPR137	0.00706381	-0.107866	RNAi Dependency
RS1	0.00707637	0.0909592	RNAi Dependency
MDP1	0.00708123	0.107813	RNAi Dependency
LCORL	0.00708204	0.0688365	RNAi Dependency
RHBDF1	0.00708377	-0.0809454	RNAi Dependency
GTPBP8	0.00711415	-0.0923691	RNAi Dependency
RNASE10	0.00711795	0.0727576	RNAi Dependency
CTNNB1	0.00714379	-0.131254	RNAi Dependency
PDCL3P4	0.00717749	-0.078284	RNAi Dependency
MAPK9	0.00724622	0.0690458	RNAi Dependency
HTR4	0.00730095	-0.0772542	RNAi Dependency
UFC1	0.00731828	0.106086	RNAi Dependency
KLK5	0.00732724	0.0709272	RNAi Dependency
PTP4A2	0.00734359	-0.0754635	RNAi Dependency
NSD3	0.00734841	-0.0837214	RNAi Dependency
VPS28	0.0073587	0.133961	RNAi Dependency
METTL2A	0.00737413	0.0668088	RNAi Dependency
MTFP1	0.00738814	-0.0982197	RNAi Dependency
NOX1	0.0074252	0.0627492	RNAi Dependency
TSPEAR	0.00744465	0.0995139	RNAi Dependency
MPZ	0.00746386	0.0677917	RNAi Dependency
HIF2A	0.00747082	-0.068936	RNAi Dependency
DDC	0.00747421	0.0835434	RNAi Dependency
RNF213	0.00749794	0.0771264	RNAi Dependency
CHGA	0.00750931	0.0696764	RNAi Dependency
TNFAIP3	0.0075529	0.0759479	RNAi Dependency
MRPL19	0.00763225	-0.0927846	RNAi Dependency
SHH	0.00763648	0.0715002	RNAi Dependency
SSR2	0.00763758	-0.0681099	RNAi Dependency
PHKA1	0.00766982	0.0651719	RNAi Dependency
WNT7B	0.00771294	-0.0660999	RNAi Dependency
LINC00518	0.00771567	0.0682231	RNAi Dependency
ADD3	0.00772828	-0.0924836	RNAi Dependency
NOXO1	0.00773635	0.0774412	RNAi Dependency
ARSG	0.00775161	-0.0782428	RNAi Dependency
KHDRBS2	0.0077607	0.0715647	RNAi Dependency
STARD6	0.00777093	-0.0894178	RNAi Dependency
SERP1	0.00778922	-0.100362	RNAi Dependency
RAPGEF6	0.00784571	0.0886765	RNAi Dependency
CWC22	0.00786821	-0.123535	RNAi Dependency
OGDH	0.00787334	0.141673	RNAi Dependency
HLA-F	0.00787744	-0.0706451	RNAi Dependency
MKRN2	0.00789049	-0.0589869	RNAi Dependency
SLC28A3	0.00791277	-0.068041	RNAi Dependency
C1QTNF9	0.00791346	-0.105346	RNAi Dependency
SI	0.00793266	-0.0658578	RNAi Dependency
SLCO2A1	0.00807143	-0.0652115	RNAi Dependency
CAMK2B	0.00807225	0.074402	RNAi Dependency
DOK5	0.00810103	-0.124581	RNAi Dependency
FERD3L	0.00813249	0.0700554	RNAi Dependency
PFDN4	0.00816303	-0.103952	RNAi Dependency
NUDT4&NUDT4P2&NUDT4P1	0.0081753	0.0903487	RNAi Dependency
COPS8	0.008176	-0.12061	RNAi Dependency
UBL4A	0.00819926	-0.0733957	RNAi Dependency
UNC5C	0.00824996	-0.082959	RNAi Dependency
ZBED9	0.00827907	0.103583	RNAi Dependency
ABCA6	0.00829738	0.0542691	RNAi Dependency
ARMC8	0.00831874	0.112287	RNAi Dependency
ZNF625-ZNF20&ZNF20	0.00832687	-0.0675108	RNAi Dependency
MFAP5	0.00832972	0.101099	RNAi Dependency
HIF1AN	0.00833508	0.0621895	RNAi Dependency
IGF2BP3	0.00835369	-0.0838631	RNAi Dependency
EGFLAM	0.0083702	-0.115337	RNAi Dependency
PIGZ	0.00837863	-0.0850589	RNAi Dependency
PURB	0.00837927	0.103705	RNAi Dependency
PLIN5	0.00838853	0.0915529	RNAi Dependency
TMEM106C	0.00841247	-0.130808	RNAi Dependency
IFNL1	0.00844207	0.0666857	RNAi Dependency
SRC	0.00845674	0.0689692	RNAi Dependency
HSD17B2	0.0084656	-0.0771736	RNAi Dependency
CWF19L2	0.00850572	-0.161173	RNAi Dependency
RPP40	0.00860545	0.113018	RNAi Dependency
MDGA1	0.00871303	-0.0887088	RNAi Dependency
IFNG	0.00873198	0.0633619	RNAi Dependency
REXO4	0.00875582	0.077744	RNAi Dependency
SIGLEC12	0.00876372	0.0885065	RNAi Dependency
ZDHHC15	0.00878854	0.118689	RNAi Dependency
PCNX2	0.00884857	-0.101713	RNAi Dependency
SERPINB5	0.00891448	-0.0663223	RNAi Dependency
ZNF181	0.00894206	0.0852108	RNAi Dependency
PWWP2B	0.0089482	0.0773258	RNAi Dependency
CNTN1	0.00897256	-0.0782678	RNAi Dependency
S100A14	0.00899587	0.0724867	RNAi Dependency
THAP8	0.00901113	-0.0783512	RNAi Dependency
ZNF132	0.00901957	0.0608748	RNAi Dependency
STAU1	0.00902409	0.0975008	RNAi Dependency
ATP6V0B	0.00903401	0.116329	RNAi Dependency
ECM1	0.00904104	0.0803366	RNAi Dependency
GOLGA8A&GOLGA8B	0.009049	0.0820021	RNAi Dependency
DEF6	0.00905868	0.0724327	RNAi Dependency
GALNT3	0.00906357	0.07161	RNAi Dependency
CSNK2B	0.00906567	0.126126	RNAi Dependency
LAT	0.00907271	0.0709237	RNAi Dependency
POC5	0.00915694	0.0870367	RNAi Dependency
PDE4B	0.00915744	-0.0712106	RNAi Dependency
SSTR5	0.00916059	-0.0739362	RNAi Dependency
EOMES	0.00916649	0.0637775	RNAi Dependency
FSTL4	0.00919068	-0.084491	RNAi Dependency
PKD1P3-NPIPA1&PKD1P4-NPIPA8&PKD1P1	0.00919536	-0.0715767	RNAi Dependency
MINK1	0.00921173	0.0611957	RNAi Dependency
NDUFA13	0.00923043	-0.0546778	RNAi Dependency
NMBR	0.009232	-0.0664574	RNAi Dependency
IMPDH1	0.00925759	-0.0811411	RNAi Dependency
LOC391322	0.00925906	-0.115444	RNAi Dependency
PCDHGB4	0.00929287	0.0804154	RNAi Dependency
CNGA1	0.00931991	0.0645853	RNAi Dependency
MARS	0.00932791	0.069257	RNAi Dependency
LPA	0.00939494	0.0598532	RNAi Dependency
SYNJ2BP-COX16	0.00941356	0.122801	RNAi Dependency
OIP5	0.00944362	0.129335	RNAi Dependency
STAM	0.00945025	-0.114038	RNAi Dependency
PTCH2	0.00947853	-0.0687005	RNAi Dependency
ADAMTS18	0.00949428	-0.0643898	RNAi Dependency
SACS	0.0095095	0.0695248	RNAi Dependency
OR52E8	0.00950992	-0.0527432	RNAi Dependency
MBTPS1	0.00952156	-0.0703302	RNAi Dependency
UBE2E2	0.0095442	-0.0634894	RNAi Dependency
ZNF663P	0.00954429	0.0816976	RNAi Dependency
ACP2	0.00954613	-0.0694974	RNAi Dependency
EVC2	0.00954984	-0.0602544	RNAi Dependency
SPDEF	0.00956804	-0.0871149	RNAi Dependency
RBM34	0.00961899	-0.0966766	RNAi Dependency
PDZD8	0.00962833	-0.103598	RNAi Dependency
LYL1	0.00963558	0.0840831	RNAi Dependency
RANGAP1	0.00966457	-0.0933364	RNAi Dependency
CKLF-CMTM1	0.00970937	-0.0665017	RNAi Dependency
TXNL1	0.00971962	0.0617282	RNAi Dependency
OR52M1	0.00974255	-0.0635992	RNAi Dependency
ATP6V1C2	0.00978148	-0.0733516	RNAi Dependency
OR11H12&OR11H2&OR11H1	0.00978511	-0.0662151	RNAi Dependency
RAB35	0.00980507	-0.0982489	RNAi Dependency
EPHA1	0.00985381	0.0796504	RNAi Dependency
GIMAP8	0.00985743	-0.0718548	RNAi Dependency
ELOVL5	0.00990965	0.105032	RNAi Dependency
LMX1B	0.00991676	-0.076015	RNAi Dependency
SOCS1	0.00995266	0.0730664	RNAi Dependency
TEX38	0.010008	-0.106783	RNAi Dependency
NDUFB3	0.0100355	0.0768561	RNAi Dependency
HOXA4	0.0100757	0.0649719	RNAi Dependency
MNDA	0.0100764	-0.066371	RNAi Dependency
TXNL4B	0.0100839	0.0674617	RNAi Dependency
FAM71A	0.0100921	0.0984593	RNAi Dependency
DCAF6	0.0101013	-0.0823402	RNAi Dependency
TBCC	0.0101337	-0.0788743	RNAi Dependency
GTPBP2	0.0101393	-0.0699498	RNAi Dependency
PSG5	0.0101505	0.086198	RNAi Dependency
PIGC	0.0101752	-0.109894	RNAi Dependency
PLEKHH1	0.0101813	0.0888683	RNAi Dependency
HGF	0.0102102	0.061535	RNAi Dependency
SH3BP5	0.0102137	-0.0887882	RNAi Dependency
BZW2	0.0102206	0.101839	RNAi Dependency
CCDC80	0.0102277	0.0887751	RNAi Dependency
CCDC93	0.0102585	0.0650634	RNAi Dependency
GPC3	0.0102872	0.0657555	RNAi Dependency
SLC39A3	0.0102942	0.0766691	RNAi Dependency
ALDOC	0.0103274	-0.063743	RNAi Dependency
CTGF	0.0103701	0.0623701	RNAi Dependency
ETV1	0.0104094	0.0690839	RNAi Dependency
FCRL2	0.0104501	-0.0642483	RNAi Dependency
VEGFA	0.0104553	-0.0719575	RNAi Dependency
RXFP3	0.0104577	-0.0664292	RNAi Dependency
RAB18	0.0104772	0.0981245	RNAi Dependency
RASGEF1C	0.0104785	-0.0763629	RNAi Dependency
SRR	0.0104928	0.0738067	RNAi Dependency
SLC6A19	0.0105003	0.0688123	RNAi Dependency
KDELR1	0.0105061	0.0764932	RNAi Dependency
LFNG	0.0105072	-0.0955168	RNAi Dependency
HSBP1L1	0.0105391	-0.107862	RNAi Dependency
ACO2	0.0105468	-0.120051	RNAi Dependency
MSMO1	0.0105469	-0.0625989	RNAi Dependency
TMEM70	0.0105558	0.109825	RNAi Dependency
GRK1	0.0105912	-0.0625966	RNAi Dependency
DHRS11	0.0106261	-0.063569	RNAi Dependency
VENTX	0.0106407	-0.0721839	RNAi Dependency
PRTFDC1	0.0106499	-0.0622864	RNAi Dependency
REEP1	0.0106612	0.0685108	RNAi Dependency
OR7D2	0.0106647	-0.112686	RNAi Dependency
XRCC6	0.0106657	-0.109099	RNAi Dependency
FAM133DP&FAM133CP	0.0106683	0.110511	RNAi Dependency
RPA1	0.01068	0.11037	RNAi Dependency
RAMP3	0.0107265	-0.0698048	RNAi Dependency
MAP3K15	0.0107489	-0.0602339	RNAi Dependency
ACSF2	0.0107648	-0.0921958	RNAi Dependency
C22orf31	0.010768	0.0855679	RNAi Dependency
ZNF529	0.0107752	-0.0632085	RNAi Dependency
UBE2H	0.0107939	-0.0719331	RNAi Dependency
SMARCA1	0.0108699	0.0623934	RNAi Dependency
OLR1	0.0109471	-0.068071	RNAi Dependency
ZSCAN16	0.0109814	0.0599055	RNAi Dependency
PHEX	0.0109986	-0.0663624	RNAi Dependency
ACTN3	0.0110007	0.0627671	RNAi Dependency
SKIV2L	0.011025	-0.0758163	RNAi Dependency
ZNF423	0.0110707	0.0723407	RNAi Dependency
PPP1R3F	0.0110916	0.0617137	RNAi Dependency
PCED1A	0.0111259	-0.0876643	RNAi Dependency
UBTD2	0.0111591	-0.0715574	RNAi Dependency
KXD1	0.0111648	0.0800956	RNAi Dependency
ALDH1B1	0.0111703	-0.10832	RNAi Dependency
ZNF385A	0.0111794	0.12939	RNAi Dependency
RPTOR	0.0111994	0.106776	RNAi Dependency
USP15	0.0112078	-0.0675075	RNAi Dependency
GRM1	0.0113632	0.0926159	RNAi Dependency
ABHD5	0.0113634	-0.0677238	RNAi Dependency
RNF114	0.0113645	0.0791477	RNAi Dependency
C11orf74	0.01139	-0.0842982	RNAi Dependency
NUDT1	0.0114223	-0.0810695	RNAi Dependency
MAP3K11	0.0114382	-0.0775265	RNAi Dependency
SECISBP2	0.0114409	-0.121197	RNAi Dependency
GATA4	0.0116088	-0.0828265	RNAi Dependency
TMLHE	0.0116301	0.0580454	RNAi Dependency
F11	0.0116336	-0.0616837	RNAi Dependency
PAPOLA	0.0116535	0.0683632	RNAi Dependency
RBP3	0.0116943	-0.078533	RNAi Dependency
TMED7	0.011705	0.0662523	RNAi Dependency
LINC00597	0.0117656	-0.120535	RNAi Dependency
ZNF791	0.0117659	-0.0744879	RNAi Dependency
PLP1	0.0117748	0.0531126	RNAi Dependency
CHD7	0.0117868	0.0841636	RNAi Dependency
ISCA1	0.0118469	-0.125595	RNAi Dependency
CFH	0.0118619	0.0664338	RNAi Dependency
ZNF215	0.0118909	-0.0642679	RNAi Dependency
CHRAC1	0.0119029	0.0699134	RNAi Dependency
DCAKD	0.0119219	-0.0725572	RNAi Dependency
SYT7	0.0119762	-0.067511	RNAi Dependency
PEX7	0.0121093	0.108341	RNAi Dependency
IGBP1	0.0121261	0.0806697	RNAi Dependency
TYRP1	0.0121318	0.100082	RNAi Dependency
ASAH1	0.0121462	0.105916	RNAi Dependency
CAPG	0.0122378	0.0848049	RNAi Dependency
CSAG1	0.0122681	0.0967432	RNAi Dependency
EIF2AK2	0.0122926	0.0672421	RNAi Dependency
PDIA4	0.0123733	-0.0628303	RNAi Dependency
CACNB2	0.0123792	-0.057767	RNAi Dependency
TMPRSS6	0.0124101	0.0849787	RNAi Dependency
PLPP3	0.0124157	0.0707641	RNAi Dependency
QSOX2	0.0124221	0.0699389	RNAi Dependency
GPR68	0.0124329	-0.0865699	RNAi Dependency
LRP1B	0.0124349	-0.0850223	RNAi Dependency
SKA3	0.0125518	-0.102406	RNAi Dependency
PHF6	0.012571	-0.0746149	RNAi Dependency
COL4A6	0.0126254	-0.0786794	RNAi Dependency
HTR3E	0.0126286	-0.0806459	RNAi Dependency
RASGRP4	0.0126447	-0.0545896	RNAi Dependency
CDKN2AIPNL	0.0126481	-0.0724365	RNAi Dependency
UBE2D3	0.0126654	-0.100691	RNAi Dependency
DNAJC16	0.0127164	-0.0704263	RNAi Dependency
ZNF90	0.0127168	0.0648977	RNAi Dependency
PGC	0.0127342	-0.0591683	RNAi Dependency
PITPNB	0.0128247	-0.0847682	RNAi Dependency
ZNF415	0.0128283	-0.0876878	RNAi Dependency
HMGXB3	0.012879	-0.0992309	RNAi Dependency
FHL5	0.0129329	0.0869218	RNAi Dependency
ASNSD1	0.0130195	-0.0929156	RNAi Dependency
EID1	0.0130545	-0.114287	RNAi Dependency
ZSWIM3	0.0130942	0.0927818	RNAi Dependency
ZNF648	0.01312	0.0602787	RNAi Dependency
KLF1	0.0131444	-0.0636699	RNAi Dependency
PPP6R3	0.0131473	0.120273	RNAi Dependency
TIA1	0.0131816	0.0648738	RNAi Dependency
GATA1	0.0131917	0.0785086	RNAi Dependency
EXOC3	0.0131955	0.0812183	RNAi Dependency
KIF1B	0.0132149	-0.0581647	RNAi Dependency
PKM	0.0132239	0.114954	RNAi Dependency
ASCL4	0.0132404	0.0728445	RNAi Dependency
PEX16	0.0132495	-0.108443	RNAi Dependency
ARL3	0.013257	0.0525149	RNAi Dependency
KLRK1	0.0132863	0.064384	RNAi Dependency
TSPAN17	0.0133591	-0.0623602	RNAi Dependency
PDE1A	0.0134287	-0.0463137	RNAi Dependency
NFKB2	0.013436	-0.0807925	RNAi Dependency
VIM	0.0134506	0.0586447	RNAi Dependency
PLEKHM1	0.0134825	-0.0862474	RNAi Dependency
ARF6	0.0135055	0.0677919	RNAi Dependency
TOMM20	0.0135116	-0.11208	RNAi Dependency
ZNF385B	0.0135358	0.0753179	RNAi Dependency
ADGRE3	0.0135391	-0.0736656	RNAi Dependency
SPP2	0.0135509	-0.0702218	RNAi Dependency
MYCBP2	0.0135828	-0.0701031	RNAi Dependency
KIR3DL3	0.0136741	0.0753659	RNAi Dependency
ADGRA2	0.0136883	-0.0594485	RNAi Dependency
CASP10	0.0137861	-0.0695834	RNAi Dependency
DNAJB2	0.0137974	0.0729904	RNAi Dependency
SOS2	0.0138016	-0.0648185	RNAi Dependency
IL17RE	0.0139358	0.0733833	RNAi Dependency
CDC7	0.014037	-0.0729857	RNAi Dependency
CAMK2D	0.0140687	-0.0628317	RNAi Dependency
ASMT	0.0140888	-0.0656072	RNAi Dependency
CRYGB	0.0141071	0.0988708	RNAi Dependency
NACC1	0.0141276	0.0969295	RNAi Dependency
PCDHGA11	0.0141547	-0.0611076	RNAi Dependency
SPIN2B&SPIN2A	0.0141829	-0.0805146	RNAi Dependency
JRKL	0.0142312	0.0874535	RNAi Dependency
ZNF496	0.0142658	-0.0746793	RNAi Dependency
KDR	0.0142779	0.0630692	RNAi Dependency
MRPS2	0.0142797	-0.117552	RNAi Dependency
GGT7	0.0143196	0.0623453	RNAi Dependency
MOBP	0.0143401	-0.0821817	RNAi Dependency
RNF152	0.0143585	0.0735004	RNAi Dependency
CXCR5	0.0143888	-0.0746582	RNAi Dependency
FGD6	0.0144076	0.0695311	RNAi Dependency
TSPAN4	0.0144651	0.104391	RNAi Dependency
NOD1	0.0145211	0.100151	RNAi Dependency
ASCC3	0.0145367	-0.0849796	RNAi Dependency
YIPF4	0.0146062	0.106569	RNAi Dependency
ORMDL2	0.0146486	0.0899337	RNAi Dependency
ZNF565	0.0146512	0.0706766	RNAi Dependency
EIF3L	0.0146621	-0.0727678	RNAi Dependency
PDZK1	0.0146624	0.0530919	RNAi Dependency
LARP7	0.0146762	-0.128596	RNAi Dependency
SNPH	0.0146855	-0.0725739	RNAi Dependency
RIOK2	0.0147229	-0.0872328	RNAi Dependency
RBMXL1	0.0147666	-0.0831508	RNAi Dependency
C10orf120	0.0147888	-0.0955119	RNAi Dependency
MSL3	0.014802	-0.097463	RNAi Dependency
PTGES3	0.0148084	-0.0681211	RNAi Dependency
PLS3	0.0148653	0.0571935	RNAi Dependency
BCL10	0.0148888	-0.0649978	RNAi Dependency
ACOT9	0.0148928	0.0642152	RNAi Dependency
LAMA5	0.0148981	-0.120846	RNAi Dependency
DIEXF	0.0149066	-0.0437213	RNAi Dependency
BCL2	0.014962	-0.0826638	RNAi Dependency
ARHGEF10	0.0149794	-0.0709538	RNAi Dependency
ITGA7	0.0149825	-0.0534522	RNAi Dependency
SELENOK	0.0149831	-0.0815804	RNAi Dependency
RAB3D	0.0149874	0.0496886	RNAi Dependency
CYSTM1	0.0150072	0.0630763	RNAi Dependency
GPBAR1	0.0150217	-0.0686261	RNAi Dependency
KBTBD3	0.0150219	-0.0788912	RNAi Dependency
DAZAP1	0.0150417	-0.151529	RNAi Dependency
ARL13B	0.0150739	-0.0908809	RNAi Dependency
OLFM4	0.0150837	-0.0997753	RNAi Dependency
LZTS3	0.0151066	-0.0999316	RNAi Dependency
N4BP3	0.0151118	0.0604502	RNAi Dependency
SLC24A4	0.0151387	0.0647625	RNAi Dependency
IL17RA	0.015191	0.0519191	RNAi Dependency
ACTB	0.0152051	-0.0971845	RNAi Dependency
INSL4	0.0152077	-0.0965317	RNAi Dependency
TMEM108	0.015231	0.100056	RNAi Dependency
ADA	0.0152461	-0.0773894	RNAi Dependency
MICB	0.0152597	-0.0606081	RNAi Dependency
SRF	0.0152893	0.0761591	RNAi Dependency
IRX6	0.0153922	-0.0637933	RNAi Dependency
MLXIPL	0.0153929	0.0745848	RNAi Dependency
AXDND1	0.0154674	-0.0944377	RNAi Dependency
CARM1	0.0154969	0.0801139	RNAi Dependency
JUNB	0.0155421	-0.0645553	RNAi Dependency
MLXIP	0.0155712	0.0788154	RNAi Dependency
NUP85	0.0155794	0.0890737	RNAi Dependency
F5	0.0157311	0.05787	RNAi Dependency
STX5	0.0157349	0.0614734	RNAi Dependency
LILRP2	0.0157876	0.0707682	RNAi Dependency
PARD3B	0.0158024	-0.094522	RNAi Dependency
SLC16A5	0.0158162	-0.0808845	RNAi Dependency
RRM1	0.0158881	0.0884768	RNAi Dependency
GPR82	0.0159204	-0.0619903	RNAi Dependency
CENPF	0.0159827	-0.0775171	RNAi Dependency
ZNF142	0.0160044	0.0699133	RNAi Dependency
NTSR1	0.016026	0.073432	RNAi Dependency
PTGER3	0.0160443	-0.0945861	RNAi Dependency
SOST	0.0161243	-0.0681129	RNAi Dependency
SLC43A1	0.016129	-0.0541862	RNAi Dependency
SLC19A2	0.0161428	0.0597403	RNAi Dependency
MRC1	0.0161744	-0.0634494	RNAi Dependency
GALNS	0.0162065	-0.0769558	RNAi Dependency
CCNB1IP1	0.0162369	-0.0527073	RNAi Dependency
HIST1H3H	0.0162431	0.0572645	RNAi Dependency
FUT3	0.0162579	0.0685394	RNAi Dependency
GRIA4	0.0162751	-0.0740176	RNAi Dependency
DNA2	0.0162834	-0.071702	RNAi Dependency
SNTA1	0.0162943	0.0535397	RNAi Dependency
SLC39A14	0.0163076	-0.0922085	RNAi Dependency
ARFGAP1	0.0163343	-0.0760009	RNAi Dependency
SUSD2	0.0163778	0.0857623	RNAi Dependency
LOC107987484&LOC107987485&LOC107987486&LOC107987487&LOC107987488&LOC107987489&LOC107987490&LOC107987491	0.0164057	-0.061058	RNAi Dependency
CSPG5	0.016411	0.0798112	RNAi Dependency
HIST1H4H	0.0164979	0.0953485	RNAi Dependency
GSAP	0.0165002	-0.0532085	RNAi Dependency
UBQLN1	0.0165205	0.0686962	RNAi Dependency
ZNF2	0.0165237	0.0490073	RNAi Dependency
CDH24	0.0165515	-0.0900384	RNAi Dependency
SPATA31D1	0.0165688	0.101009	RNAi Dependency
AXIN1	0.0166115	0.0846959	RNAi Dependency
LAMC2	0.0166488	0.0682018	RNAi Dependency
AFF4	0.0167295	0.0770367	RNAi Dependency
PCLAF	0.0167645	-0.0704446	RNAi Dependency
SNW1	0.0168481	-0.113065	RNAi Dependency
ZNF207	0.0168508	0.0782301	RNAi Dependency
PTGES	0.0168552	-0.0622353	RNAi Dependency
DCUN1D1	0.0168775	-0.0838141	RNAi Dependency
ZNF501	0.0169413	-0.0496113	RNAi Dependency
MDGA2	0.0169779	-0.070139	RNAi Dependency
HIST2H2BF	0.0169803	0.0568499	RNAi Dependency
DNER	0.017039	-0.0883245	RNAi Dependency
PSEN1	0.0170799	0.0584098	RNAi Dependency
HNRNPF	0.0170803	0.0726641	RNAi Dependency
PDCD2L	0.0170804	0.0898175	RNAi Dependency
DEFB103A&DEFB103B	0.0171328	0.0845709	RNAi Dependency
ARHGDIB	0.0171464	-0.0595478	RNAi Dependency
RNF103	0.017252	0.0634859	RNAi Dependency
OR8B8	0.0172585	0.0797944	RNAi Dependency
SH3BGR	0.0172968	-0.0900145	RNAi Dependency
KRT19	0.017317	-0.0701096	RNAi Dependency
SPACA5&SPACA5B	0.0173303	0.0568448	RNAi Dependency
LEAP2	0.0173318	0.0884806	RNAi Dependency
ARID2	0.0173556	-0.115334	RNAi Dependency
SPIN4	0.017363	0.10698	RNAi Dependency
HOMER2	0.0174159	0.0708148	RNAi Dependency
ACSL6	0.0174361	-0.0674502	RNAi Dependency
RAP1B	0.0175162	-0.0705779	RNAi Dependency
UGT2A2	0.0175565	-0.0642639	RNAi Dependency
PATL1	0.0175751	-0.0998301	RNAi Dependency
CTSB	0.0175782	0.0721648	RNAi Dependency
SYNDIG1	0.0175837	-0.102377	RNAi Dependency
TAF11	0.0176018	0.0963821	RNAi Dependency
CITED4	0.017604	0.0523811	RNAi Dependency
FAM19A1	0.0177109	-0.0866202	RNAi Dependency
CEP250	0.017734	-0.064799	RNAi Dependency
IPPK	0.0177566	-0.103639	RNAi Dependency
IGF2R	0.0177589	-0.0637517	RNAi Dependency
NDOR1	0.0177743	0.0502233	RNAi Dependency
HIST2H2BE	0.0177836	-0.0589041	RNAi Dependency
KRT14	0.0178289	0.0602954	RNAi Dependency
CDH1	0.0178733	0.0726711	RNAi Dependency
ZNF146	0.0178954	-0.0780121	RNAi Dependency
NBEA	0.0179298	0.0695655	RNAi Dependency
STRN	0.0179344	0.0691113	RNAi Dependency
GABRA2	0.0179649	0.0902385	RNAi Dependency
ANP32A	0.017965	0.0572603	RNAi Dependency
GPR135	0.0179856	0.0773415	RNAi Dependency
BCL2L11	0.0179875	0.0693509	RNAi Dependency
MAD2L1	0.0180322	-0.121292	RNAi Dependency
PIP4K2C	0.0180578	0.0558935	RNAi Dependency
SLC25A21	0.0180626	0.0488375	RNAi Dependency
IL7R	0.0180673	-0.0617615	RNAi Dependency
NCBP3	0.0180787	-0.0586689	RNAi Dependency
GPX3	0.0180958	-0.0600476	RNAi Dependency
ZNHIT3	0.0181091	-0.0620003	RNAi Dependency
TBL1X	0.0181195	0.0893381	RNAi Dependency
SUMO3	0.0181683	-0.076243	RNAi Dependency
RIPPLY3	0.0182206	0.0685622	RNAi Dependency
NDUFS1	0.0183098	-0.0809886	RNAi Dependency
SH3BP2	0.0183448	-0.0826897	RNAi Dependency
GPALPP1	0.0183505	-0.0783509	RNAi Dependency
AKAP6	0.0184016	-0.061944	RNAi Dependency
CPPED1	0.018409	0.0716855	RNAi Dependency
LONRF1	0.0184198	0.0703504	RNAi Dependency
SNX16	0.0184401	-0.102433	RNAi Dependency
UGT1A9	0.0184557	0.0680095	RNAi Dependency
SPDYE3	0.0185023	-0.0895282	RNAi Dependency
UCN2	0.0185133	-0.0824632	RNAi Dependency
STAM2	0.0185501	-0.0680913	RNAi Dependency
KLC1	0.0185539	-0.107776	RNAi Dependency
DOLK	0.018575	-0.0973173	RNAi Dependency
ADCY3	0.0185919	0.072088	RNAi Dependency
CCR3	0.0187142	0.0655064	RNAi Dependency
AKAP8	0.0187731	-0.0654889	RNAi Dependency
RAB24	0.0188707	0.0678596	RNAi Dependency
KMT2B	0.0189137	-0.063147	RNAi Dependency
ZNF260	0.0189162	0.0885438	RNAi Dependency
TSC2	0.0189783	-0.0974272	RNAi Dependency
SDR42E2&LOC105371187	0.0189822	0.0598077	RNAi Dependency
CZ1P-ASNS	0.018995	0.0551587	RNAi Dependency
CNKSR2	0.0190179	0.0474482	RNAi Dependency
ACSM3	0.0190199	-0.070083	RNAi Dependency
SLC36A4	0.0190212	-0.053599	RNAi Dependency
RNASET2	0.0190427	-0.0610679	RNAi Dependency
PKD2L2	0.0190539	-0.0614031	RNAi Dependency
PCSK1N	0.0190845	-0.064472	RNAi Dependency
SLC25A14	0.0191105	-0.0649797	RNAi Dependency
LRP11	0.0191206	-0.0817424	RNAi Dependency
FGD5	0.0191454	-0.0797896	RNAi Dependency
KIF25	0.0191776	-0.0652805	RNAi Dependency
OR51E2	0.0191977	-0.0633571	RNAi Dependency
RDX	0.0192498	-0.0744155	RNAi Dependency
FSCN2	0.0192868	0.0828302	RNAi Dependency
CACNA1E	0.0192924	0.0625541	RNAi Dependency
PROX1	0.0193158	-0.062553	RNAi Dependency
ENTPD3	0.0193433	-0.065787	RNAi Dependency
NRP1	0.0193444	-0.0750042	RNAi Dependency
SLC39A13	0.0194549	-0.100083	RNAi Dependency
TM9SF3	0.0194573	-0.0631094	RNAi Dependency
GPM6B	0.0194716	-0.0664091	RNAi Dependency
FAM187B	0.0194744	0.0778422	RNAi Dependency
SLC31A2	0.0194919	-0.0717003	RNAi Dependency
GRIN2A	0.0195333	0.0525309	RNAi Dependency
MICALL2	0.0196166	0.115732	RNAi Dependency
PYHIN1	0.0196311	-0.0643236	RNAi Dependency
PPP1R7	0.0196995	0.0791093	RNAi Dependency
IFNGR1	0.0197204	-0.0557465	RNAi Dependency
UTS2	0.0197256	-0.0806313	RNAi Dependency
DDX17	0.0197264	-0.121295	RNAi Dependency
ANXA10	0.0197288	0.0624433	RNAi Dependency
ZPBP	0.0197517	-0.0898767	RNAi Dependency
CHKB	0.019814	0.0514916	RNAi Dependency
CHRND	0.0198318	-0.0683894	RNAi Dependency
RAB1A	0.0198549	0.10196	RNAi Dependency
TSC22D3	0.0198806	-0.0648951	RNAi Dependency
TUBB4B	0.0198905	-0.0909913	RNAi Dependency
UTY	0.0199259	-0.063307	RNAi Dependency
CHURC1	0.0199774	0.0995641	RNAi Dependency
ID1	0.0199912	0.0646195	RNAi Dependency
FXYD3	0.0200305	0.0648454	RNAi Dependency
ST3GAL5	0.0200479	0.0577863	RNAi Dependency
SOCS5	0.0200593	0.0584628	RNAi Dependency
TFE3	0.0200681	0.0618174	RNAi Dependency
ENO3	0.0202402	0.101521	RNAi Dependency
ANKRD45	0.0202436	-0.0955479	RNAi Dependency
ERICH5	0.0202556	-0.146592	RNAi Dependency
ZNF518B	0.0202861	-0.0785508	RNAi Dependency
BCL9L	0.0202895	-0.0678023	RNAi Dependency
COMMD2	0.0203135	0.0981576	RNAi Dependency
ANKRD13B	0.0203186	0.0846819	RNAi Dependency
DPP9	0.0203327	-0.0764562	RNAi Dependency
ADH7	0.0203679	0.0884208	RNAi Dependency
CPA5	0.0203957	0.0572544	RNAi Dependency
TMPRSS4	0.0204023	0.0579157	RNAi Dependency
ABLIM3	0.020447	-0.0786528	RNAi Dependency
TTLL11	0.0204601	0.0870091	RNAi Dependency
KCNN3	0.0204625	0.0565196	RNAi Dependency
NMNAT2	0.0204962	-0.0537968	RNAi Dependency
PAK1	0.0204983	-0.050497	RNAi Dependency
NXPE1	0.0205266	-0.0907797	RNAi Dependency
COL25A1	0.0205449	-0.0626746	RNAi Dependency
OR7A5	0.020556	-0.0660754	RNAi Dependency
CYBA	0.0206126	0.0648235	RNAi Dependency
GPR137B	0.0206361	-0.0949338	RNAi Dependency
TATDN2	0.0207175	-0.0606385	RNAi Dependency
TRPM6	0.0207495	-0.0650571	RNAi Dependency
WIPI1	0.0208255	0.0803663	RNAi Dependency
LMAN2	0.0208442	-0.0652548	RNAi Dependency
C2orf71	0.0208702	0.0991958	RNAi Dependency
GTF3C4	0.0208719	-0.058291	RNAi Dependency
NT5M	0.0208726	0.0701554	RNAi Dependency
RIIAD1	0.0209526	-0.109688	RNAi Dependency
SLC35C2	0.0209901	0.0462587	RNAi Dependency
RAN	0.0210001	0.104932	RNAi Dependency
CREB3	0.0210439	-0.0704368	RNAi Dependency
ESR1	0.0210609	-0.0764475	RNAi Dependency
RLN1	0.0210942	0.0824935	RNAi Dependency
C19orf68	0.0211188	-0.0675091	RNAi Dependency
ALDH1A1	0.0211637	0.0485317	RNAi Dependency
ARL8B	0.0212024	0.0583116	RNAi Dependency
TMC1	0.0212337	0.0789777	RNAi Dependency
USF2	0.0212417	-0.0749016	RNAi Dependency
JAML	0.0212486	-0.0767489	RNAi Dependency
BPIFA3	0.021268	-0.0799281	RNAi Dependency
LOC102725117&ARHGEF5	0.0212685	0.0530843	RNAi Dependency
CATSPERB	0.0213243	0.0843939	RNAi Dependency
SBSPON	0.0213365	-0.0618527	RNAi Dependency
2019-09-07	0.0213852	-0.11222	RNAi Dependency
HIST1H2BG	0.0214108	0.0603766	RNAi Dependency
LBH	0.0214142	0.0686734	RNAi Dependency
LOC101929812&LOC102724994&LOC102724995&LOC107986351	0.0214145	0.0681877	RNAi Dependency
ANGEL2	0.0214518	-0.0674689	RNAi Dependency
KRT6A	0.021484	0.0585635	RNAi Dependency
QPRT	0.0215091	0.0392631	RNAi Dependency
LRMP	0.0215591	-0.0540245	RNAi Dependency
LRRC8D	0.0215694	-0.0739946	RNAi Dependency
PAX3	0.0215857	0.0572364	RNAi Dependency
MEIS1	0.0216056	0.0686489	RNAi Dependency
RMDN1	0.0216097	-0.0910342	RNAi Dependency
VIP	0.0216104	-0.0734403	RNAi Dependency
SLC37A2	0.0216364	0.0727091	RNAi Dependency
STX19	0.0217228	0.0664883	RNAi Dependency
PNMA5	0.0217247	0.0838773	RNAi Dependency
RAB43	0.0217387	-0.0817366	RNAi Dependency
RASSF7	0.0217499	-0.0640151	RNAi Dependency
C11orf95	0.0217996	-0.0996104	RNAi Dependency
KEL	0.0218268	-0.0581513	RNAi Dependency
RASSF3	0.0218308	0.0639483	RNAi Dependency
TNFRSF8	0.0218945	0.0698393	RNAi Dependency
EMC10	0.0219004	0.0902543	RNAi Dependency
TRAPPC4	0.0219099	0.0857332	RNAi Dependency
DCXR	0.0219358	-0.0891657	RNAi Dependency
PKDCC	0.0219887	-0.0781779	RNAi Dependency
CCSAP	0.0219923	-0.0829308	RNAi Dependency
PHF5A	0.0220017	-0.101288	RNAi Dependency
FBXO21	0.0220786	-0.0810095	RNAi Dependency
ROBO4	0.0221812	-0.0693528	RNAi Dependency
FBN1	0.0222116	-0.0635094	RNAi Dependency
SLC9A4	0.0222539	-0.114897	RNAi Dependency
EFNA2	0.0222548	0.0673942	RNAi Dependency
RPSAP58	0.0222821	0.0654228	RNAi Dependency
LRPPRC	0.0222959	-0.0872172	RNAi Dependency
PDE6G	0.0223306	-0.0554296	RNAi Dependency
BCAS2	0.0223622	-0.0794818	RNAi Dependency
ZSWIM2	0.0223707	-0.0587254	RNAi Dependency
TYW1	0.0223879	-0.0569693	RNAi Dependency
CLCN7	0.0224057	-0.0715135	RNAi Dependency
CSN3	0.0224423	-0.0854937	RNAi Dependency
TEKT5	0.0224601	0.0891541	RNAi Dependency
MLH1	0.0225526	-0.0488274	RNAi Dependency
SPPL2C	0.0225583	-0.0679805	RNAi Dependency
ARHGAP6	0.0225722	0.0589479	RNAi Dependency
CACNB1	0.0225936	-0.0802227	RNAi Dependency
ZMYND15	0.0226312	-0.105129	RNAi Dependency
KBTBD6	0.0226731	0.0877305	RNAi Dependency
NLGN1	0.0226949	-0.0531284	RNAi Dependency
RAB11FIP3	0.0227393	-0.0738241	RNAi Dependency
ZNF229	0.0227497	-0.0849485	RNAi Dependency
PURG	0.022776	-0.0772354	RNAi Dependency
PAK3	0.0228134	-0.0534983	RNAi Dependency
PRY2&PRY	0.0228331	-0.0969826	RNAi Dependency
ETFDH	0.0228529	-0.0559559	RNAi Dependency
ZNF416	0.022875	0.0565019	RNAi Dependency
ATP11A	0.0228804	0.071024	RNAi Dependency
PJA1	0.0228884	0.0674998	RNAi Dependency
EI24	0.0229391	-0.116123	RNAi Dependency
RAB14	0.023039	0.0746925	RNAi Dependency
CEBPA	0.023144	0.0677194	RNAi Dependency
GPR179	0.0231733	0.052616	RNAi Dependency
SLC25A4	0.0232003	0.0744024	RNAi Dependency
EIF4ENIF1	0.0232212	0.0833834	RNAi Dependency
TMEM132B	0.0232242	-0.100946	RNAi Dependency
SULT4A1	0.0232315	-0.0612261	RNAi Dependency
BAALC	0.0232404	0.0733534	RNAi Dependency
OR2D3	0.0232838	-0.0557341	RNAi Dependency
AGMAT	0.0233179	0.0655549	RNAi Dependency
MAP4K2	0.0234038	0.0500785	RNAi Dependency
LINC01567	0.0234787	-0.0761012	RNAi Dependency
GCNT2	0.0234867	0.0702143	RNAi Dependency
MSN	0.0234896	0.057669	RNAi Dependency
ALOX5AP	0.0235077	0.0537667	RNAi Dependency
MAPKAPK2	0.0235202	-0.0675663	RNAi Dependency
PRKCH	0.0235466	0.0623856	RNAi Dependency
LCMT1	0.0236099	0.080492	RNAi Dependency
GREB1	0.0236344	0.0592034	RNAi Dependency
DSCR4	0.023641	-0.0713808	RNAi Dependency
MGRN1	0.0236534	0.0843813	RNAi Dependency
ITGB8	0.0236753	-0.0652652	RNAi Dependency
EIF2B2	0.0236851	-0.102933	RNAi Dependency
CETN1	0.0237841	0.0605485	RNAi Dependency
ASAP2	0.0239192	-0.0603415	RNAi Dependency
FAM171A2	0.0239238	-0.104004	RNAi Dependency
TMPO	0.0239243	0.0564672	RNAi Dependency
CSAG2&CSAG3	0.0239418	-0.091594	RNAi Dependency
LOC102725241	0.023985	0.0687291	RNAi Dependency
TMEM47	0.0241087	-0.0821443	RNAi Dependency
SFSWAP	0.0241723	-0.0889467	RNAi Dependency
SPACA6	0.0241871	-0.0872209	RNAi Dependency
NPY1R	0.0242057	-0.0633103	RNAi Dependency
SLC22A25	0.0242133	-0.0544456	RNAi Dependency
ENDOV	0.0242326	-0.079142	RNAi Dependency
SERPINA5	0.0242519	-0.0657375	RNAi Dependency
ALDH3A1	0.0242585	0.0470561	RNAi Dependency
FPGT-TNNI3K	0.024287	-0.0654449	RNAi Dependency
SHPK	0.0243317	-0.0624537	RNAi Dependency
MCOLN1	0.0243521	0.0564031	RNAi Dependency
SELENOS	0.0243841	-0.0593278	RNAi Dependency
SPATS2L	0.024403	-0.0616818	RNAi Dependency
TFPI2	0.024413	-0.0504841	RNAi Dependency
COL9A1	0.0244468	-0.0486696	RNAi Dependency
CDK9	0.0244859	0.0773588	RNAi Dependency
KDM5B	0.0245253	-0.0649162	RNAi Dependency
BEX3	0.0245724	0.065564	RNAi Dependency
MTSS1L	0.0246957	-0.086161	RNAi Dependency
LENG1	0.0247653	0.0614434	RNAi Dependency
DEPDC1B	0.024771	0.0502526	RNAi Dependency
QTRT1	0.0247834	-0.0573523	RNAi Dependency
ZNF391	0.0248056	-0.0738967	RNAi Dependency
DSG1	0.0249243	0.0604493	RNAi Dependency
ITFG1	0.0249326	-0.111483	RNAi Dependency
PRDM11	0.0249491	-0.064877	RNAi Dependency
RBM43	0.0249887	0.101511	RNAi Dependency
SDE2	0.0250419	-0.0821504	RNAi Dependency
RDM1	0.0250462	-0.0922113	RNAi Dependency
ASL	0.0250497	-0.0675664	RNAi Dependency
ZNF704	0.0250523	-0.0774296	RNAi Dependency
TNFSF4	0.0251547	-0.0668116	RNAi Dependency
NPHP4	0.0251715	-0.0750092	RNAi Dependency
OPN1MW3&LOC107984055&OPN1MW&OPN1MW2	0.0252	0.063157	RNAi Dependency
RNF5P1&RNF5	0.0253306	-0.0650257	RNAi Dependency
KISS1R	0.0254092	0.060747	RNAi Dependency
TBX3	0.0254282	-0.0880542	RNAi Dependency
PHF1	0.0254439	-0.0542242	RNAi Dependency
CRB3	0.0254533	0.0822845	RNAi Dependency
GRIN2C	0.0254614	0.104417	RNAi Dependency
P2RY12	0.0255171	-0.0570095	RNAi Dependency
BPIFA4P	0.0255275	0.0819161	RNAi Dependency
DTX3L	0.0255738	0.0530346	RNAi Dependency
PCDHB7	0.0255847	-0.0465299	RNAi Dependency
DNAJB9	0.0255855	-0.0665993	RNAi Dependency
BAMBI	0.0255902	-0.105062	RNAi Dependency
FER1L6-AS2	0.0256291	-0.088897	RNAi Dependency
ZNF658B	0.0256315	0.0420957	RNAi Dependency
NNMT	0.0256343	-0.0628156	RNAi Dependency
TMEM186	0.0257236	-0.0940457	RNAi Dependency
MCM4	0.0257378	-0.0821597	RNAi Dependency
SOX18	0.0257468	-0.0648337	RNAi Dependency
CYYR1	0.0257853	0.0891523	RNAi Dependency
ROR2	0.0258013	0.0766174	RNAi Dependency
PSMB6	0.0258184	0.117738	RNAi Dependency
POLR2C	0.0258802	-0.120737	RNAi Dependency
LOC105369247	0.0259069	0.0299723	RNAi Dependency
UBD	0.0259862	0.0563274	RNAi Dependency
ARID3A	0.0260305	0.0554078	RNAi Dependency
LMNA	0.0260322	-0.0908876	RNAi Dependency
DZIP1	0.0260526	-0.0807339	RNAi Dependency
CCIN	0.0262263	0.0802036	RNAi Dependency
DBF4B	0.0262302	0.0836257	RNAi Dependency
COL6A1	0.0263239	0.094257	RNAi Dependency
CPNE1	0.0263432	0.0568506	RNAi Dependency
SOD3	0.02636	0.0695888	RNAi Dependency
RAX	0.0263755	0.064806	RNAi Dependency
OTOA	0.0264471	0.0798595	RNAi Dependency
PRDM10	0.026459	0.0871982	RNAi Dependency
TTLL10	0.0265299	0.0811363	RNAi Dependency
C12orf40	0.0265328	-0.0654403	RNAi Dependency
RBM24	0.026536	0.0867472	RNAi Dependency
HIKESHI	0.0265568	0.0917315	RNAi Dependency
KCNS1	0.0265633	0.0663678	RNAi Dependency
APOM	0.0265986	-0.0672169	RNAi Dependency
SPG21	0.0266162	-0.0630804	RNAi Dependency
ZNF474	0.0266576	0.0767381	RNAi Dependency
PHYHD1	0.026658	0.063837	RNAi Dependency
CS	0.0267492	-0.0741522	RNAi Dependency
PIP5KL1	0.0267748	-0.0521653	RNAi Dependency
SGCB	0.0267836	-0.0943758	RNAi Dependency
ENTPD4	0.0268147	0.0564615	RNAi Dependency
DCPS	0.0268324	0.0830916	RNAi Dependency
POU1F1	0.0268729	0.0449208	RNAi Dependency
DNAAF1	0.0269054	-0.0943597	RNAi Dependency
MRGPRX1	0.0269195	-0.0702708	RNAi Dependency
ST6GALNAC4	0.0269306	-0.0564103	RNAi Dependency
MX1	0.0269384	0.0537315	RNAi Dependency
GPR142	0.0269593	-0.0731988	RNAi Dependency
EDIL3	0.0270007	0.074793	RNAi Dependency
SNRPD3	0.0270269	-0.0842304	RNAi Dependency
ALDH1A3	0.0271583	0.0532028	RNAi Dependency
ITPR3	0.0272034	-0.0718834	RNAi Dependency
GPR25	0.0272261	-0.0622602	RNAi Dependency
DYNC1H1	0.027297	-0.108872	RNAi Dependency
IL24	0.0273062	0.0607457	RNAi Dependency
TBC1D4	0.0273194	0.102122	RNAi Dependency
CYP11A1	0.0273709	0.0535919	RNAi Dependency
SPECC1L	0.0274168	-0.0947192	RNAi Dependency
MRPL32	0.0274912	-0.107143	RNAi Dependency
SLC2A4	0.0275032	-0.0548896	RNAi Dependency
TCP1	0.0276502	0.0796647	RNAi Dependency
MED19	0.0276913	0.0963737	RNAi Dependency
HAS1	0.0277033	-0.0571022	RNAi Dependency
TAOK3	0.0277491	0.0724136	RNAi Dependency
ZNF549	0.0277507	0.0502363	RNAi Dependency
KIFC3	0.0277544	-0.0876628	RNAi Dependency
LINC01558	0.0277819	-0.0793274	RNAi Dependency
PACS1	0.0277896	-0.0922923	RNAi Dependency
BPGM	0.0278894	-0.0615044	RNAi Dependency
EFNA3	0.0278967	-0.0564314	RNAi Dependency
ARHGEF11	0.0279026	0.0547663	RNAi Dependency
GNB1L	0.0279047	-0.0787329	RNAi Dependency
SELENOO	0.0279327	0.0730366	RNAi Dependency
GPR171	0.0279638	-0.0599388	RNAi Dependency
RADIL	0.0279847	-0.0717928	RNAi Dependency
CD1C	0.0279981	0.0702027	RNAi Dependency
UGT3A1	0.0280326	-0.0791628	RNAi Dependency
KIFC1	0.0280608	-0.0728986	RNAi Dependency
KMT5C	0.0280649	-0.0768293	RNAi Dependency
CCDC148	0.0280771	0.067074	RNAi Dependency
GPR22	0.0281313	-0.065299	RNAi Dependency
GIMAP4	0.028142	-0.055522	RNAi Dependency
JPH4	0.0281721	0.0817625	RNAi Dependency
TMEM128	0.0281801	-0.0795513	RNAi Dependency
KCNIP2	0.0282053	0.0520695	RNAi Dependency
CHCHD7	0.0282454	-0.0770349	RNAi Dependency
GRB10	0.0282716	-0.0657738	RNAi Dependency
SS18L2	0.0284452	-0.0647033	RNAi Dependency
NFE2L2	0.0284853	-0.0646461	RNAi Dependency
AGAP7P	0.0285108	-0.0531856	RNAi Dependency
IL17B	0.028564	0.0619773	RNAi Dependency
MIS18BP1	0.0285676	-0.0624672	RNAi Dependency
ZNF384	0.0286504	0.0662893	RNAi Dependency
WDFY1	0.0286642	0.0880212	RNAi Dependency
PGM2L1	0.0286656	0.0628667	RNAi Dependency
EEF1A1	0.0287312	0.15896	RNAi Dependency
TP73	0.0287404	-0.0697527	RNAi Dependency
FAM182A	0.0287848	-0.0876164	RNAi Dependency
MAPK14	0.0287968	0.0602657	RNAi Dependency
DNAJC17	0.0290137	-0.0736591	RNAi Dependency
JMJD7-PLA2G4B	0.0290796	-0.0454844	RNAi Dependency
CEPT1	0.0291267	0.0737875	RNAi Dependency
DZIP3	0.029178	-0.0548798	RNAi Dependency
FSBP	0.0291834	0.0653634	RNAi Dependency
GPR88	0.0291921	-0.0713375	RNAi Dependency
MATN1	0.0291966	-0.0685058	RNAi Dependency
SORCS2	0.0292405	-0.0635874	RNAi Dependency
ZCCHC14	0.0292689	-0.0556341	RNAi Dependency
PABPC3	0.0292725	-0.0763926	RNAi Dependency
ZNF92	0.0293162	0.0522211	RNAi Dependency
TSPYL5	0.0293517	0.11732	RNAi Dependency
A1CF	0.0293764	0.0693544	RNAi Dependency
FAM72C&FAM72B&FAM72D&FAM72A	0.0294535	0.0698034	RNAi Dependency
UHRF1	0.0295591	-0.0747268	RNAi Dependency
FLII	0.0295614	-0.096456	RNAi Dependency
FBL	0.0295898	0.133236	RNAi Dependency
H2AFY	0.0296029	-0.0756864	RNAi Dependency
SLC28A1	0.0296539	0.0680482	RNAi Dependency
PDHB	0.029661	-0.0657414	RNAi Dependency
ZNF585B	0.0297172	0.058187	RNAi Dependency
STX17	0.0297296	0.0591724	RNAi Dependency
ZNF217	0.0297479	0.0623792	RNAi Dependency
ABL2	0.0297835	-0.0652143	RNAi Dependency
RNF216	0.0297951	0.060206	RNAi Dependency
CPNE3	0.0298498	0.0708411	RNAi Dependency
CES1P2	0.0298506	0.0774757	RNAi Dependency
NTRK1	0.0301024	0.0578441	RNAi Dependency
WNT6	0.0301661	-0.0812478	RNAi Dependency
TFPI	0.030194	-0.0586807	RNAi Dependency
STK17A	0.0302176	0.0590788	RNAi Dependency
VPS37B	0.0302408	0.0951952	RNAi Dependency
CCDC91	0.0302955	-0.0928636	RNAi Dependency
ADGRL4	0.0303157	0.0446884	RNAi Dependency
SCP2	0.0303324	-0.0989333	RNAi Dependency
FGF7	0.0303353	-0.048075	RNAi Dependency
NTPCR	0.0303384	-0.0913175	RNAi Dependency
FGL1	0.0304095	0.0819794	RNAi Dependency
CALML4	0.0304661	0.0526687	RNAi Dependency
ENTPD1	0.0304717	-0.0573936	RNAi Dependency
BTBD1	0.0304908	-0.0707153	RNAi Dependency
ATPAF2	0.0305326	-0.0480904	RNAi Dependency
OR5C1	0.0305377	-0.0611375	RNAi Dependency
NEFM	0.0305438	-0.104077	RNAi Dependency
CD34	0.0305994	-0.0543693	RNAi Dependency
ZNF582	0.0306062	-0.0486492	RNAi Dependency
CRYZL1	0.0306611	0.0784053	RNAi Dependency
RRAS2	0.0306787	0.0602067	RNAi Dependency
TUSC2	0.0307904	-0.0756453	RNAi Dependency
ZNF888	0.0308352	-0.0544407	RNAi Dependency
CYP4F11	0.0308403	0.0637357	RNAi Dependency
ZNF624	0.0308637	0.0527102	RNAi Dependency
EPB41L4B	0.0308808	0.0633723	RNAi Dependency
MMRN1	0.0308821	0.0542513	RNAi Dependency
IL12RB2	0.0308973	-0.0735424	RNAi Dependency
NCOA3	0.0309409	0.0650466	RNAi Dependency
SPAG16	0.0310184	-0.0768482	RNAi Dependency
AHCYL2	0.0310196	0.0607638	RNAi Dependency
CYP2R1	0.0310275	0.0543199	RNAi Dependency
KRT84	0.0310551	-0.0961871	RNAi Dependency
GYG1	0.0311014	0.047733	RNAi Dependency
CELF6	0.0311106	-0.0526965	RNAi Dependency
NDUFB9	0.0311197	-0.0765968	RNAi Dependency
OLAH	0.0311851	0.0477263	RNAi Dependency
SLX1A-SULT1A3&SLX1B-SULT1A4	0.031396	0.046035	RNAi Dependency
SH2B2	0.0314508	0.0840021	RNAi Dependency
ZAP70	0.0314548	0.0552173	RNAi Dependency
APOBEC4	0.0314718	-0.0862207	RNAi Dependency
ALDH1L2	0.0314883	0.0684651	RNAi Dependency
VPS13D	0.0315099	0.0758713	RNAi Dependency
TNRC6B	0.031541	0.0951399	RNAi Dependency
TNNT1	0.0315506	0.0796491	RNAi Dependency
ZNF792	0.03156	0.0544119	RNAi Dependency
ATPAF1	0.031563	0.0620208	RNAi Dependency
ZNF33A	0.0316011	-0.0509909	RNAi Dependency
OR6K6	0.0316047	0.0584782	RNAi Dependency
BAD	0.0316166	0.0587648	RNAi Dependency
MLNR	0.0316331	0.0649012	RNAi Dependency
TNKS	0.0316409	0.0676463	RNAi Dependency
KRTAP6-3	0.0316802	-0.0736881	RNAi Dependency
CXCL8	0.0316869	0.0598387	RNAi Dependency
GMPS	0.0317171	0.0458982	RNAi Dependency
FLRT1	0.0317341	0.0673051	RNAi Dependency
BTN3A1	0.0317342	0.0630525	RNAi Dependency
PIP4K2B	0.0317397	-0.0462598	RNAi Dependency
FGL2	0.03174	-0.0857522	RNAi Dependency
INMT	0.0317454	-0.0757616	RNAi Dependency
ZNF184	0.031758	-0.0889097	RNAi Dependency
PCDHB3	0.0317598	0.054568	RNAi Dependency
FBRSL1	0.031789	-0.102709	RNAi Dependency
CACNG3	0.0318616	-0.0696844	RNAi Dependency
SPG11	0.0318682	-0.084822	RNAi Dependency
TCEA3	0.0318703	0.0864017	RNAi Dependency
DHX37	0.0318877	0.075106	RNAi Dependency
G6PD	0.0319064	0.0616851	RNAi Dependency
USP47	0.0319181	0.067659	RNAi Dependency
ZNRF4	0.0319584	0.0647204	RNAi Dependency
PYCARD	0.0319912	-0.0642796	RNAi Dependency
TRAPPC1	0.0321194	-0.0631369	RNAi Dependency
SPIRE1	0.0321351	-0.0881772	RNAi Dependency
GLMP	0.0322094	-0.0537374	RNAi Dependency
GOLGA6C	0.0322153	-0.0742078	RNAi Dependency
DNAJC22	0.0322382	0.0677521	RNAi Dependency
GLIPR1L1	0.0322425	-0.0720228	RNAi Dependency
LOC101928879	0.032248	0.0540205	RNAi Dependency
DOC2A	0.0322942	0.0643071	RNAi Dependency
RAB37	0.0323182	-0.0564406	RNAi Dependency
ARHGAP23	0.0323453	0.0534741	RNAi Dependency
UNKL	0.0323576	-0.0831528	RNAi Dependency
MTRF1	0.0323882	-0.0895826	RNAi Dependency
SLC22A23	0.0324432	-0.0517662	RNAi Dependency
CABLES1	0.0324641	-0.0579328	RNAi Dependency
AMDHD2	0.032473	0.0595785	RNAi Dependency
TMIGD3	0.0324831	-0.0582159	RNAi Dependency
FUT4	0.0325295	-0.0684161	RNAi Dependency
CDK7	0.0325459	0.0662282	RNAi Dependency
ARL4A	0.0325652	-0.0610945	RNAi Dependency
CSTB	0.0325693	0.0600804	RNAi Dependency
RASSF2	0.0325852	-0.0607263	RNAi Dependency
HOXD8	0.0326041	0.0676675	RNAi Dependency
SLC35E3	0.0326437	0.0708947	RNAi Dependency
ZNF471	0.0326781	-0.074075	RNAi Dependency
CTNS	0.0326939	-0.0579832	RNAi Dependency
DMBT1	0.0327642	-0.0591905	RNAi Dependency
MCM6	0.0327994	-0.0853237	RNAi Dependency
EHMT2	0.0328188	-0.0500833	RNAi Dependency
TTBK2	0.0328612	0.0596573	RNAi Dependency
PROC	0.0328734	-0.0489657	RNAi Dependency
PRDX1	0.0328919	-0.0999498	RNAi Dependency
PNPLA8	0.0329706	-0.0509754	RNAi Dependency
KRT72	0.0330081	0.0822477	RNAi Dependency
IBA57	0.03309	-0.0930139	RNAi Dependency
WDR90	0.0331526	-0.0822024	RNAi Dependency
CMA1	0.033161	0.0790989	RNAi Dependency
TNNC1	0.0331711	-0.0557048	RNAi Dependency
ATP6V1A	0.033202	-0.0670586	RNAi Dependency
TCEANC2	0.0332238	0.0691769	RNAi Dependency
KRT2	0.0332384	0.0794738	RNAi Dependency
PPIP5K1P1-CATSPER2	0.0332426	-0.0636961	RNAi Dependency
HRH3	0.0332859	-0.0984179	RNAi Dependency
TIMM22	0.0333188	-0.100373	RNAi Dependency
C14orf166	0.033327	-0.0759699	RNAi Dependency
ING3	0.0333499	-0.0637492	RNAi Dependency
KIAA0895	0.0333986	-0.113267	RNAi Dependency
GPX5	0.0333991	0.0559528	RNAi Dependency
ARV1	0.0334019	-0.0603642	RNAi Dependency
STRBP	0.0334024	-0.0465775	RNAi Dependency
LINC01879	0.0334132	-0.0654551	RNAi Dependency
ARHGEF9	0.0334525	-0.0528028	RNAi Dependency
TDO2	0.0334594	-0.0736244	RNAi Dependency
MED13	0.0334653	-0.0456328	RNAi Dependency
PALM2	0.0335633	0.062386	RNAi Dependency
HLA-DPB1	0.0336035	-0.0581683	RNAi Dependency
DBX2	0.0336537	-0.0475712	RNAi Dependency
SLC10A5	0.0336811	-0.0529023	RNAi Dependency
KRT35	0.0337288	0.0721285	RNAi Dependency
ERVFRD-1	0.0337824	0.0676193	RNAi Dependency
TC2N	0.0338761	-0.0738725	RNAi Dependency
PCAT4	0.0339675	0.0754086	RNAi Dependency
AZGP1	0.0340109	0.0449014	RNAi Dependency
TATDN1	0.0340236	0.0696635	RNAi Dependency
MYBPC2	0.0340435	-0.0734257	RNAi Dependency
CD177	0.0340627	0.0744953	RNAi Dependency
COL17A1	0.0340963	0.0831538	RNAi Dependency
NOP2	0.0341374	0.133055	RNAi Dependency
SFTA2	0.0341854	-0.0958457	RNAi Dependency
XIRP1	0.0341939	0.0650095	RNAi Dependency
WDR86	0.0342315	0.0660972	RNAi Dependency
ACOT8	0.0342423	0.0786694	RNAi Dependency
CYP2A6	0.0342537	-0.0518524	RNAi Dependency
FCHSD1	0.0342765	-0.0663481	RNAi Dependency
RASIP1	0.0343008	0.0559212	RNAi Dependency
NSUN6	0.0343924	-0.0924378	RNAi Dependency
ARL6	0.0344009	-0.0470797	RNAi Dependency
TBC1D22A	0.0344096	-0.0879047	RNAi Dependency
C11orf1	0.0344434	-0.0870765	RNAi Dependency
SLC15A2	0.03445	-0.0546247	RNAi Dependency
NPPA	0.0345079	0.0854193	RNAi Dependency
GRIPAP1	0.0345827	-0.0675761	RNAi Dependency
GINM1	0.0345877	-0.0995495	RNAi Dependency
MYO1H	0.034588	0.0977451	RNAi Dependency
CMTM4	0.0346059	0.0846812	RNAi Dependency
YY1AP1	0.0346167	-0.0670226	RNAi Dependency
NRG3	0.0346557	-0.0786374	RNAi Dependency
BPIFB3	0.0347063	-0.0790685	RNAi Dependency
FAM47E-STBD1	0.0347197	-0.0932347	RNAi Dependency
WHRN	0.0347258	-0.0999193	RNAi Dependency
PGAM2	0.0347368	0.0566213	RNAi Dependency
GLYATL3	0.0348522	-0.0925214	RNAi Dependency
CERKL	0.0348559	0.0547982	RNAi Dependency
PRAMEF8&PRAMEF7	0.0348566	0.0841734	RNAi Dependency
LDLRAD3	0.0348869	0.0850055	RNAi Dependency
PSMA3	0.0349227	-0.0882622	RNAi Dependency
KRT78	0.0349336	0.0703137	RNAi Dependency
CUL9	0.0349357	-0.0584772	RNAi Dependency
RPL4	0.0349958	0.102965	RNAi Dependency
HTRA3	0.0350066	-0.0449492	RNAi Dependency
TCTN1	0.0350265	0.0949149	RNAi Dependency
JADE3	0.035029	0.0496125	RNAi Dependency
HIST1H2AB	0.0350294	-0.0556146	RNAi Dependency
SFPQ	0.035032	0.0862053	RNAi Dependency
RNF14	0.0350847	-0.0597531	RNAi Dependency
RNF20	0.0351373	-0.0589246	RNAi Dependency
APBA3	0.0351536	0.0756878	RNAi Dependency
OR1E1	0.0351555	-0.0530193	RNAi Dependency
LCMT2	0.0351772	0.0565788	RNAi Dependency
AHSA2	0.0352154	-0.0848	RNAi Dependency
NOX5	0.0352212	0.0576965	RNAi Dependency
PNPLA6	0.0352334	0.0637219	RNAi Dependency
RNF121	0.0352338	-0.067262	RNAi Dependency
OVCH2	0.0352593	-0.0717563	RNAi Dependency
CTSA	0.0353172	0.0611309	RNAi Dependency
MCM9	0.0353502	0.0717205	RNAi Dependency
COG3	0.0354421	0.0633123	RNAi Dependency
SFXN1	0.0354481	0.0585393	RNAi Dependency
LMBRD1	0.0354564	-0.0536157	RNAi Dependency
MET	0.0354788	-0.0651024	RNAi Dependency
HIST1H1E	0.0355382	-0.0904276	RNAi Dependency
SDR16C6P	0.0355625	0.0521547	RNAi Dependency
HIST1H4C	0.0355777	-0.0646788	RNAi Dependency
TMEM174	0.0356489	0.0633443	RNAi Dependency
TSPO2	0.0357042	-0.0677118	RNAi Dependency
CCDC92	0.0357174	-0.104105	RNAi Dependency
VAMP5	0.0357327	-0.0721723	RNAi Dependency
NRAS	0.0357365	0.0849375	RNAi Dependency
PMEL	0.0357404	0.0783662	RNAi Dependency
RARS2	0.0357441	-0.0722937	RNAi Dependency
NFIB	0.0357761	-0.0771926	RNAi Dependency
THAP3	0.0357871	-0.0731947	RNAi Dependency
PTDSS1	0.0358662	-0.0567393	RNAi Dependency
TEX261	0.0359703	0.0803832	RNAi Dependency
TRIM73	0.0360073	0.0589833	RNAi Dependency
CASTOR2	0.0360426	-0.0850247	RNAi Dependency
SNX24	0.0360535	-0.0667373	RNAi Dependency
ANO1	0.036096	0.0561897	RNAi Dependency
YEATS4	0.0361246	-0.0479408	RNAi Dependency
ITGA2B	0.0362456	-0.0641415	RNAi Dependency
ZNF410	0.0362758	0.0763037	RNAi Dependency
VIPR1	0.0362901	-0.0540421	RNAi Dependency
MRGPRX3	0.0364166	-0.0616361	RNAi Dependency
CBLC	0.0364282	-0.0484069	RNAi Dependency
ZSCAN5A	0.0364939	0.0603596	RNAi Dependency
DDX1	0.03653	-0.0673797	RNAi Dependency
URGCP	0.0365561	0.0729631	RNAi Dependency
SUMO1P3	0.0366988	-0.0826596	RNAi Dependency
PIWIL2	0.0368117	-0.0702546	RNAi Dependency
PON3	0.0368874	0.0668401	RNAi Dependency
NFXL1	0.0368878	-0.0480012	RNAi Dependency
UFL1	0.0368901	-0.0906009	RNAi Dependency
PLA2G2D	0.036953	0.0710968	RNAi Dependency
GBX2	0.0370299	0.0525937	RNAi Dependency
GRPR	0.0370548	-0.0568627	RNAi Dependency
PLCG1	0.0370663	-0.0656075	RNAi Dependency
ARC	0.0370983	-0.065932	RNAi Dependency
MBNL3	0.0371454	0.0963691	RNAi Dependency
RSL24D1	0.0371671	0.0940866	RNAi Dependency
RSAD1	0.0371726	0.0520904	RNAi Dependency
ZNF684	0.037189	0.0534599	RNAi Dependency
OR10H2	0.0372013	-0.0457897	RNAi Dependency
RCVRN	0.0372031	0.0668184	RNAi Dependency
C8orf33	0.0373179	-0.0693875	RNAi Dependency
AFTPH	0.0373422	-0.0717388	RNAi Dependency
CACNA1F	0.0373715	-0.0562885	RNAi Dependency
SLC17A7	0.0374047	0.0502379	RNAi Dependency
SLC3A1	0.0374117	-0.0622312	RNAi Dependency
FAAH	0.0375109	0.0645508	RNAi Dependency
MYO1A	0.0375219	0.0569436	RNAi Dependency
PMP2	0.0376349	0.0420336	RNAi Dependency
NEUROD4	0.0376731	-0.0530447	RNAi Dependency
RGS3	0.0376906	-0.0714746	RNAi Dependency
CNRIP1	0.037724	0.0674869	RNAi Dependency
FUT6	0.0377877	-0.0654063	RNAi Dependency
IL1R1	0.0378244	-0.0683486	RNAi Dependency
ZBTB33	0.0378388	0.0698872	RNAi Dependency
DOK2	0.0378651	-0.0970204	RNAi Dependency
PRRX2	0.0379177	0.0628697	RNAi Dependency
OAS3	0.0379259	-0.050591	RNAi Dependency
LEMD2	0.0380001	-0.0799984	RNAi Dependency
TMEM39A	0.0380133	-0.0856153	RNAi Dependency
TRDMT1	0.0381305	-0.0809469	RNAi Dependency
RWDD1	0.0381325	-0.0612233	RNAi Dependency
CFP	0.0381722	-0.055716	RNAi Dependency
CLCA2	0.0382091	0.06586	RNAi Dependency
MFAP3L	0.0382145	-0.112659	RNAi Dependency
PARD6G-AS1	0.038215	-0.0968854	RNAi Dependency
APEH	0.0382649	-0.0638555	RNAi Dependency
CASC1	0.0382661	-0.0526902	RNAi Dependency
BCL11A	0.0382973	0.0659554	RNAi Dependency
OR13A1	0.0383143	0.0563578	RNAi Dependency
TCEAL2	0.0383636	-0.0714156	RNAi Dependency
AQP12A	0.0385746	0.0632343	RNAi Dependency
RPL10L	0.0386037	-0.0768733	RNAi Dependency
CACNA2D1	0.0386491	0.0498213	RNAi Dependency
ISX	0.0386537	0.0487921	RNAi Dependency
DENND4A	0.0387726	-0.140763	RNAi Dependency
TAB1	0.0387909	0.0579873	RNAi Dependency
NDUFA9	0.0388027	-0.0615031	RNAi Dependency
MTIF3	0.038837	0.0782228	RNAi Dependency
RASA1	0.0389104	-0.0589672	RNAi Dependency
RAB1B	0.0389471	0.0730573	RNAi Dependency
NDUFV3	0.0389688	-0.0638833	RNAi Dependency
DLX4	0.0389728	-0.0561714	RNAi Dependency
ORMDL1	0.0389774	-0.0923471	RNAi Dependency
SERPINB4	0.0390279	0.080083	RNAi Dependency
GAL3ST3	0.0390477	0.0601718	RNAi Dependency
RPS20	0.0392655	-0.0821521	RNAi Dependency
ANKEF1	0.0392734	-0.0545524	RNAi Dependency
RAB3C	0.0393097	-0.0470303	RNAi Dependency
ADHFE1	0.0394041	0.0447621	RNAi Dependency
TOP1MT	0.0394237	0.0450117	RNAi Dependency
PPIAL4D&PPIAL4F&PPIAL4E	0.039429	-0.0542337	RNAi Dependency
MRPL40	0.0394558	-0.142848	RNAi Dependency
EXOSC3	0.0394609	0.0820398	RNAi Dependency
PHKG2	0.0395055	-0.064469	RNAi Dependency
BEX1	0.0395789	-0.0688583	RNAi Dependency
ADPRM	0.0396787	-0.0646022	RNAi Dependency
PPFIBP1	0.0396911	-0.061066	RNAi Dependency
PAQR4	0.039733	-0.061233	RNAi Dependency
RETSAT	0.0397784	-0.0641304	RNAi Dependency
MTMR12	0.0398374	-0.0542861	RNAi Dependency
GBE1	0.0399173	-0.0502631	RNAi Dependency
LIPT1	0.0399871	0.0517235	RNAi Dependency
ACRBP	0.039998	0.0508012	RNAi Dependency
UNC13D	0.0400147	0.0797052	RNAi Dependency
MRPL35	0.0400648	-0.0934469	RNAi Dependency
GPS2	0.0400794	-0.0681594	RNAi Dependency
S100A1	0.040159	0.0646969	RNAi Dependency
CCDC57	0.0401863	0.0947992	RNAi Dependency
LMNTD1	0.0402173	0.0617645	RNAi Dependency
KDSR	0.0402451	-0.0688709	RNAi Dependency
PLXNB3	0.0402595	-0.0496012	RNAi Dependency
NBPF19&LOC102724250&NBPF1	0.0403574	-0.065322	RNAi Dependency
IL18	0.040362	0.0486037	RNAi Dependency
AP1G2	0.040364	0.0516158	RNAi Dependency
CGB3&CGB1&CGB2&CGB5&CGB7&CGB8	0.040445	-0.051932	RNAi Dependency
FGF23	0.0404532	0.0573336	RNAi Dependency
RBM45	0.0404656	0.0645939	RNAi Dependency
NINJ1	0.0405536	-0.05144	RNAi Dependency
PARP8	0.0405711	0.0626593	RNAi Dependency
BOLL	0.0405712	-0.0825534	RNAi Dependency
DENND3	0.0405899	-0.0656307	RNAi Dependency
LIPI	0.0406042	-0.0586087	RNAi Dependency
CHAF1B	0.0406055	0.0780794	RNAi Dependency
SLC38A6	0.0406124	-0.0532399	RNAi Dependency
NDUFA4L2	0.0406242	0.0460501	RNAi Dependency
FAM129B	0.0406551	-0.105441	RNAi Dependency
SAMD12	0.0406571	0.0982555	RNAi Dependency
MANBAL	0.040701	-0.0658335	RNAi Dependency
PHOX2A	0.0407085	0.0638828	RNAi Dependency
TMEM200A	0.040745	0.0785631	RNAi Dependency
PYURF&PIGY	0.040774	0.0859977	RNAi Dependency
HLA-DOA	0.0407801	0.0524174	RNAi Dependency
KCNQ1	0.0408306	0.0604521	RNAi Dependency
WDR60	0.0408505	-0.0755276	RNAi Dependency
LCOR	0.0408771	0.053594	RNAi Dependency
TUBB1	0.0408774	0.0760496	RNAi Dependency
FZD8	0.0408904	-0.0621943	RNAi Dependency
OR5T2	0.0409015	-0.0535631	RNAi Dependency
GAS2L3	0.0409827	0.0992143	RNAi Dependency
ARHGAP4	0.0410506	0.072794	RNAi Dependency
PRKCI	0.0411134	-0.0649622	RNAi Dependency
TPRA1	0.0411599	-0.0541799	RNAi Dependency
WBP2	0.0412042	-0.0920972	RNAi Dependency
HLA-DMB	0.0412342	-0.0511212	RNAi Dependency
NKX2-5	0.0412656	0.071618	RNAi Dependency
CLEC14A	0.0412681	0.0803908	RNAi Dependency
DPH1	0.0412992	0.0518161	RNAi Dependency
HILPDA	0.0413025	0.0955002	RNAi Dependency
DAP3	0.0413143	-0.0748282	RNAi Dependency
CRH	0.041412	-0.0556285	RNAi Dependency
ZNF835	0.0414359	-0.0711476	RNAi Dependency
NKD1	0.0415169	-0.0879895	RNAi Dependency
MAPK12	0.0415684	-0.0671467	RNAi Dependency
LIPA	0.0416028	0.0506596	RNAi Dependency
GNG4	0.0416426	-0.0514237	RNAi Dependency
LDLR	0.0416539	-0.0566717	RNAi Dependency
FEZ2	0.041693	-0.0633997	RNAi Dependency
FNTB	0.041715	0.050122	RNAi Dependency
ATG3	0.0417264	0.0658735	RNAi Dependency
PEX2	0.0417465	0.0643156	RNAi Dependency
NEFH	0.0417969	0.0720498	RNAi Dependency
TMEM173	0.0418282	0.112265	RNAi Dependency
TFF2	0.0418647	-0.0569336	RNAi Dependency
HTR3C	0.0418759	0.0607971	RNAi Dependency
IL36RN	0.0419331	-0.0615917	RNAi Dependency
CSNK1A1	0.0419445	-0.108155	RNAi Dependency
DTNB	0.0419745	0.0463489	RNAi Dependency
ASB2	0.0420145	0.102149	RNAi Dependency
GML	0.0421303	0.0773579	RNAi Dependency
NLRP11	0.0421329	0.0798913	RNAi Dependency
CD79B	0.0421949	0.0781659	RNAi Dependency
KCNJ2	0.0422207	-0.0623579	RNAi Dependency
FEM1C	0.04223	-0.087955	RNAi Dependency
APBB1	0.0422469	-0.0605367	RNAi Dependency
GABRB2	0.0422662	0.0488888	RNAi Dependency
CIZ1	0.0423268	0.0827733	RNAi Dependency
CPT1B	0.0424719	-0.0484528	RNAi Dependency
PSMB9	0.0425055	0.0479773	RNAi Dependency
ACTR5	0.0426628	-0.0718557	RNAi Dependency
KCNV1	0.0426631	-0.0402149	RNAi Dependency
ADAM9	0.042693	-0.0474071	RNAi Dependency
NMB	0.0427313	-0.0791865	RNAi Dependency
CCR10	0.0427445	-0.0624098	RNAi Dependency
FAM228B	0.0427724	0.076085	RNAi Dependency
RECQL	0.0427898	0.0636182	RNAi Dependency
FBRS	0.0428096	0.10103	RNAi Dependency
ZC3H12A	0.0428783	-0.0981777	RNAi Dependency
TRPC7	0.0428954	0.0393124	RNAi Dependency
RHOBTB3	0.042986	-0.0555724	RNAi Dependency
DOCK2	0.0431559	0.0532224	RNAi Dependency
ADD2	0.0431568	-0.0638391	RNAi Dependency
PLB1	0.0431937	0.105421	RNAi Dependency
C6orf58	0.0432315	-0.0620098	RNAi Dependency
PMCH	0.0432544	-0.0824653	RNAi Dependency
DCLK3	0.0432905	-0.0504479	RNAi Dependency
SNHG14&SNRPN&SNURF	0.0433486	-0.0567342	RNAi Dependency
MRPL17	0.0435106	-0.0945073	RNAi Dependency
PIMREG	0.0435809	0.0449295	RNAi Dependency
MOCS3	0.0436329	0.0466916	RNAi Dependency
TMEM147	0.0436815	0.0796937	RNAi Dependency
LCTL	0.0437016	-0.0596948	RNAi Dependency
ARHGAP35	0.0437317	-0.0586288	RNAi Dependency
UBE4B	0.0437775	0.0598099	RNAi Dependency
CAMKV	0.043791	0.0516754	RNAi Dependency
IL10RA	0.0437932	-0.056761	RNAi Dependency
NKX2-8	0.0438359	-0.0708156	RNAi Dependency
IL12B	0.0438639	0.0498352	RNAi Dependency
PMF1	0.0439529	0.0551491	RNAi Dependency
LAMTOR3	0.0439805	0.0642119	RNAi Dependency
MAN2B1	0.0440202	0.0559058	RNAi Dependency
FXR1	0.0440557	-0.0805458	RNAi Dependency
MGAT4D	0.0441279	-0.0644933	RNAi Dependency
C10orf111	0.0441607	-0.0885573	RNAi Dependency
TNFRSF19	0.0441817	-0.0590994	RNAi Dependency
TPD52	0.044211	-0.0679112	RNAi Dependency
TIMM21	0.0442611	0.061618	RNAi Dependency
PDLIM2	0.0442838	0.0788293	RNAi Dependency
AQP4	0.0442884	-0.0555101	RNAi Dependency
CCDC81	0.0442918	-0.0797995	RNAi Dependency
GAL3ST1	0.044414	0.0545639	RNAi Dependency
PARP10	0.0444209	0.0714034	RNAi Dependency
HERC2P9	0.0444418	-0.0656788	RNAi Dependency
PCM1	0.0444473	0.103185	RNAi Dependency
UPP1	0.0444664	0.0806284	RNAi Dependency
PLOD3	0.0445246	-0.0452843	RNAi Dependency
NEDD8	0.04453	-0.0728507	RNAi Dependency
MRPS10	0.0445419	-0.0984106	RNAi Dependency
CREBL2	0.0445424	0.0539177	RNAi Dependency
PLPP2	0.0446391	0.0625805	RNAi Dependency
NPY4R2&LOC105379861&NPY4R	0.0446413	-0.0625791	RNAi Dependency
CD40	0.0446682	-0.0515566	RNAi Dependency
ZNF595	0.0447585	-0.0459123	RNAi Dependency
MRI1	0.044815	0.0873744	RNAi Dependency
SELPLG	0.0448414	0.0721749	RNAi Dependency
RBM3	0.0449024	0.0527882	RNAi Dependency
HOXD13	0.0449897	-0.0443085	RNAi Dependency
SEC1P	0.044993	-0.0611972	RNAi Dependency
MCTP2	0.04511	-0.0430093	RNAi Dependency
CXCL10	0.0451283	-0.0472329	RNAi Dependency
DQX1	0.0452495	-0.0768919	RNAi Dependency
CDC37L1	0.0452603	-0.047545	RNAi Dependency
DICER1	0.0453587	-0.0590703	RNAi Dependency
GHR	0.0453658	0.0488769	RNAi Dependency
NID2	0.0454233	-0.0686311	RNAi Dependency
MYOD1	0.0454569	0.0591586	RNAi Dependency
CD27	0.0455206	-0.0696504	RNAi Dependency
MTAP	0.0455231	0.0591903	RNAi Dependency
STAT1	0.0455586	-0.057126	RNAi Dependency
HMCES	0.045607	-0.0757852	RNAi Dependency
PAX2	0.0456942	-0.0555617	RNAi Dependency
ZNF676	0.0457263	-0.0464428	RNAi Dependency
SMURF1	0.0457463	-0.0474344	RNAi Dependency
TBC1D8	0.0457515	0.0616164	RNAi Dependency
NR1H4	0.0457905	0.0410221	RNAi Dependency
ISY1	0.0458505	0.0672757	RNAi Dependency
ANKRD17	0.0458522	-0.0790051	RNAi Dependency
CACNA1D	0.0458622	-0.0455715	RNAi Dependency
TINF2	0.0458852	-0.0621771	RNAi Dependency
TMEM243	0.0458854	-0.0526106	RNAi Dependency
SLC35D3	0.0458947	-0.0589888	RNAi Dependency
PLCB4	0.0459152	0.0496318	RNAi Dependency
NUDCD3	0.0459484	-0.0814969	RNAi Dependency
SRP68	0.0459496	-0.0562411	RNAi Dependency
HIST3H2BB	0.0459891	0.0739723	RNAi Dependency
MRGPRX2	0.0459953	-0.0609192	RNAi Dependency
POLR3D	0.0460348	0.0617185	RNAi Dependency
AGO1	0.0460763	0.0487593	RNAi Dependency
TACR1	0.0460785	-0.0561037	RNAi Dependency
PLEKHA6	0.046089	-0.100078	RNAi Dependency
RHBDD1	0.0461438	0.0627356	RNAi Dependency
FOXK1	0.0462126	-0.0786752	RNAi Dependency
CHRNE	0.0462187	-0.0559521	RNAi Dependency
IREB2	0.0462315	0.0686649	RNAi Dependency
FOXC2	0.0463442	0.0565798	RNAi Dependency
TGDS	0.0463664	0.0469207	RNAi Dependency
MYPOP	0.0463862	-0.0678254	RNAi Dependency
ACBD6	0.0464	-0.0620186	RNAi Dependency
ADCY1	0.0464155	-0.0510537	RNAi Dependency
HIPK3	0.0465535	0.05945	RNAi Dependency
DBNDD1	0.0465568	-0.0653301	RNAi Dependency
KCNRG	0.0465959	-0.0494041	RNAi Dependency
DFNA5	0.0466053	0.0445852	RNAi Dependency
GALNT8	0.046646	-0.0584649	RNAi Dependency
GUCY1B3	0.0466828	-0.0903058	RNAi Dependency
SLC22A12	0.0467019	0.0519735	RNAi Dependency
TMEM256	0.046787	-0.0917728	RNAi Dependency
FOXD4L3&FOXD4L6	0.0467884	-0.0498316	RNAi Dependency
TAF3	0.0468201	0.0702756	RNAi Dependency
CTAG2	0.046824	0.0693747	RNAi Dependency
RRP9	0.0468249	-0.0872123	RNAi Dependency
APOO	0.0468799	-0.0573043	RNAi Dependency
RACK1	0.0469963	0.077801	RNAi Dependency
SLC38A9	0.0470576	0.0765591	RNAi Dependency
DMPK	0.0470652	0.0488282	RNAi Dependency
2019-09-09	0.0470754	0.0803938	RNAi Dependency
PSPH	0.0473411	0.0517853	RNAi Dependency
SAV1	0.0473783	-0.0686572	RNAi Dependency
UBE2L3	0.04739	-0.0957286	RNAi Dependency
POMZP3	0.0473967	0.092646	RNAi Dependency
PON1	0.0474755	0.0523988	RNAi Dependency
PPP1R3B	0.0474884	0.0763196	RNAi Dependency
SMIM3	0.047495	0.0607461	RNAi Dependency
DLST	0.0475328	0.0920001	RNAi Dependency
SFXN2	0.0475516	-0.0555066	RNAi Dependency
MEMO1	0.047584	-0.0698977	RNAi Dependency
CP	0.0476152	-0.0585534	RNAi Dependency
ATP5F1	0.047761	-0.0491304	RNAi Dependency
DLG3	0.0478336	-0.0695774	RNAi Dependency
LPIN3	0.0478421	-0.0645185	RNAi Dependency
MSTN	0.0478956	-0.0456709	RNAi Dependency
BLOC1S1-RDH5	0.0480127	0.052435	RNAi Dependency
C2CD6	0.0480375	0.0854479	RNAi Dependency
SYT9	0.0480983	-0.072887	RNAi Dependency
BCL7C	0.0481505	-0.0462312	RNAi Dependency
TSNAXIP1	0.048155	0.0738478	RNAi Dependency
HSBP1	0.0481624	0.0557185	RNAi Dependency
TBC1D14	0.048182	0.0687397	RNAi Dependency
YES1	0.0481869	-0.0557481	RNAi Dependency
SLC25A24	0.0482188	-0.0465045	RNAi Dependency
MOCS1	0.0482524	0.0528417	RNAi Dependency
NDUFV2	0.0482829	-0.0507896	RNAi Dependency
CCR7	0.0483709	-0.0792835	RNAi Dependency
GABRA3	0.0484437	0.0468491	RNAi Dependency
DHRS7	0.0484962	-0.0516272	RNAi Dependency
NICN1	0.0485026	-0.0736895	RNAi Dependency
FA2H	0.0485662	0.0667775	RNAi Dependency
CASQ1	0.0485808	0.0519496	RNAi Dependency
CCDC28A	0.0485826	-0.0439836	RNAi Dependency
TAS2R41	0.0485826	-0.0543765	RNAi Dependency
PGM5	0.048614	-0.058878	RNAi Dependency
ELP4	0.0486256	0.0576798	RNAi Dependency
HSD17B7	0.0487356	0.0577142	RNAi Dependency
TMX1	0.0487808	-0.0850001	RNAi Dependency
CA1	0.0487811	0.0593951	RNAi Dependency
CRYL1	0.0488997	-0.0611763	RNAi Dependency
KLF8	0.0489853	0.042544	RNAi Dependency
CTRB1&CTRB2	0.0490713	0.0599814	RNAi Dependency
TREML1	0.0490842	0.0496977	RNAi Dependency
CCDC116	0.0491086	-0.0834855	RNAi Dependency
OR4K17	0.049259	0.0524287	RNAi Dependency
NEK3	0.0493465	-0.0555022	RNAi Dependency
NOC2L	0.049419	0.0923778	RNAi Dependency
TMX2	0.0494533	0.0462539	RNAi Dependency
SLC6A11	0.0494767	-0.0453813	RNAi Dependency
FTCD	0.0495045	-0.0563021	RNAi Dependency
CFAP20	0.0495827	-0.0569009	RNAi Dependency
P2RY13	0.0496252	-0.049213	RNAi Dependency
MELK	0.0496275	-0.0489388	RNAi Dependency
MIA3	0.0496627	-0.0640672	RNAi Dependency
NAB1	0.0497118	0.0455334	RNAi Dependency
GAK	0.0497257	0.113374	RNAi Dependency
NAB2	0.0497711	0.0523651	RNAi Dependency
MLF2	0.0498037	-0.0719118	RNAi Dependency
AFMID	0.0498081	0.0537851	RNAi Dependency
TRIM15	0.0498382	-0.0662575	RNAi Dependency
GUK1	0.0499162	-0.0588024	RNAi Dependency
ZC3H14	0.0499206	-0.0757762	RNAi Dependency
PES1	0.0499887	-0.12417	RNAi Dependency
FAM117A	0.0500021	-0.0856787	RNAi Dependency
ATP5O	0.0500122	-0.0861236	RNAi Dependency
YIPF7	0.0500325	-0.0711545	RNAi Dependency
HLA-DRB6	0.0500475	0.0550742	RNAi Dependency
HNRNPC	0.0500745	-0.0634578	RNAi Dependency
MAGEB3	0.0500873	0.0616783	RNAi Dependency
IL1RN	0.0500891	-0.0504501	RNAi Dependency
MAGEL2	0.0501371	-0.0701192	RNAi Dependency
RGPD2	0.0502087	-0.0316917	RNAi Dependency
ADAM2	0.0502345	-0.0563323	RNAi Dependency
RPS6KC1	0.050278	-0.0548318	RNAi Dependency
LINC00310	0.0502878	-0.0845438	RNAi Dependency
PSG6	0.0503093	-0.0627184	RNAi Dependency
VWA5B1	0.0503393	-0.0842808	RNAi Dependency
WDR73	0.050355	-0.104507	RNAi Dependency
PIGL	0.0504406	0.0848269	RNAi Dependency
MCM3	0.0504756	-0.0560973	RNAi Dependency
DDIT4	0.0505107	-0.0627139	RNAi Dependency
G6PC2	0.0505607	-0.0517911	RNAi Dependency
GDE1	0.0506095	0.0516193	RNAi Dependency
GBA3	0.0507093	0.0636471	RNAi Dependency
RWDD4	0.0507935	-0.0551183	RNAi Dependency
SLC9A2	0.0508252	0.0574525	RNAi Dependency
ZNF488	0.0508556	0.0471058	RNAi Dependency
PPP3R1	0.0508786	-0.0602162	RNAi Dependency
IFNE	0.0509306	-0.0551122	RNAi Dependency
DMRT3	0.0509607	0.0509003	RNAi Dependency
GRM8	0.0509614	-0.0593944	RNAi Dependency
RNF146	0.0509763	-0.0562291	RNAi Dependency
DZIP1L	0.0509927	-0.0664845	RNAi Dependency
CLDN3	0.0510306	0.0485218	RNAi Dependency
RAB3IL1	0.051085	0.0798538	RNAi Dependency
LINS1	0.0511201	0.0600699	RNAi Dependency
CCL17	0.0512087	-0.0556709	RNAi Dependency
ADAMTS13	0.0512319	-0.0469385	RNAi Dependency
MFF	0.0512737	-0.0825309	RNAi Dependency
SLC38A3	0.0513782	0.0678345	RNAi Dependency
STT3B	0.0513828	-0.086694	RNAi Dependency
CA10	0.0513866	0.0651644	RNAi Dependency
NRDC	0.0513916	0.0519231	RNAi Dependency
SERF1B&SERF1A	0.0514363	-0.0601338	RNAi Dependency
EML2	0.0517233	-0.0476199	RNAi Dependency
NME2	0.0517297	-0.0688125	RNAi Dependency
ZNF765-ZNF761&ZNF761	0.0517395	0.0413973	RNAi Dependency
TANC1	0.0517516	-0.0538486	RNAi Dependency
SLC5A6	0.0518023	-0.0505364	RNAi Dependency
TMOD1	0.0518055	-0.0455966	RNAi Dependency
CES1	0.0518214	0.0492924	RNAi Dependency
RPL24	0.0518483	-0.0831374	RNAi Dependency
ATRNL1	0.0518687	0.0567911	RNAi Dependency
RNF103-CHMP3	0.0519755	-0.0732943	RNAi Dependency
CALCB	0.0521061	-0.0719589	RNAi Dependency
TNRC6A	0.0521587	0.0963738	RNAi Dependency
ARVCF	0.0521915	-0.0864931	RNAi Dependency
CD99L2	0.0522003	-0.0772347	RNAi Dependency
HDGFL1	0.0522517	0.0710737	RNAi Dependency
LOC101929738&LOC102724151&LOC102724728&LOC107985583&POM121L8P	0.0522909	0.0605265	RNAi Dependency
PDZD7	0.0523118	-0.0882607	RNAi Dependency
INTS4P1	0.0523356	0.0579577	RNAi Dependency
CCDC138	0.0523794	0.0860211	RNAi Dependency
SLC12A5	0.0523804	-0.0574126	RNAi Dependency
TYR	0.0524036	-0.042027	RNAi Dependency
DNAJC1	0.0524086	0.0529517	RNAi Dependency
COMMD1	0.0524562	-0.10659	RNAi Dependency
FAM58A	0.0524618	-0.0628491	RNAi Dependency
ART3	0.0524768	-0.0553519	RNAi Dependency
EPO	0.0524928	0.0515076	RNAi Dependency
DCLRE1A	0.0525432	-0.0811984	RNAi Dependency
SLC22A17	0.0525628	-0.0509375	RNAi Dependency
EAF2	0.052633	0.0594017	RNAi Dependency
ERP27	0.0526664	-0.074551	RNAi Dependency
ASGR1	0.0526914	0.0632292	RNAi Dependency
RBM6	0.0527004	0.0704843	RNAi Dependency
ITGAD	0.0527541	-0.0759854	RNAi Dependency
ROPN1B	0.0527639	0.0765416	RNAi Dependency
TXNIP	0.0527828	0.0575968	RNAi Dependency
ACTR1A	0.0527974	-0.0826054	RNAi Dependency
FBXL12	0.052832	0.0582988	RNAi Dependency
TMUB2	0.0528887	-0.0483919	RNAi Dependency
RXFP2	0.0529192	0.053522	RNAi Dependency
LANCL2	0.052965	-0.0585213	RNAi Dependency
ZNF438	0.0529658	0.0669903	RNAi Dependency
STX16	0.0529892	0.0588206	RNAi Dependency
GIPC3	0.0530536	0.0831685	RNAi Dependency
MCRS1	0.0530871	0.112129	RNAi Dependency
ADAL	0.0530923	-0.0601922	RNAi Dependency
MCAM	0.0531014	0.0966983	RNAi Dependency
CCDC51	0.053102	-0.0876892	RNAi Dependency
KAAG1	0.0531275	-0.0634308	RNAi Dependency
SLC25A40	0.0531525	0.088885	RNAi Dependency
ATP4A	0.0532197	-0.0561465	RNAi Dependency
ZNF789	0.0532739	0.0690416	RNAi Dependency
EFCAB2	0.0533625	-0.0456904	RNAi Dependency
OSBP	0.0533925	0.0824263	RNAi Dependency
ATP23	0.0534123	-0.0785194	RNAi Dependency
RAB40A	0.0534128	-0.0619448	RNAi Dependency
LSM2	0.0535825	-0.073377	RNAi Dependency
PPP4C	0.0535939	0.0965751	RNAi Dependency
KCNG1	0.0536089	-0.0504216	RNAi Dependency
OR4D1	0.0536141	-0.0511212	RNAi Dependency
ASPM	0.05373	-0.077176	RNAi Dependency
TMOD3	0.0538502	0.053899	RNAi Dependency
AIMP2	0.0539438	-0.060379	RNAi Dependency
FGD4	0.0540376	0.0476073	RNAi Dependency
DNAI1	0.0540564	-0.0674625	RNAi Dependency
AKT1	0.0540685	-0.0589695	RNAi Dependency
MAPK3	0.0541054	0.0575696	RNAi Dependency
MDH2	0.0541577	0.055656	RNAi Dependency
RNASEK-C17orf49&C17orf49	0.0541773	-0.0768184	RNAi Dependency
BTN3A2	0.0541856	-0.0495168	RNAi Dependency
DAPK3	0.0542049	0.0585928	RNAi Dependency
CLDN18	0.0542252	0.06322	RNAi Dependency
RGS1	0.0542727	-0.0515497	RNAi Dependency
RARB	0.0542763	0.0533992	RNAi Dependency
MYH2	0.0542847	0.0395457	RNAi Dependency
OPCML	0.05434	-0.0807664	RNAi Dependency
TRIM2	0.0543439	-0.0570638	RNAi Dependency
SMARCA2	0.0543535	-0.0774919	RNAi Dependency
RBM15B	0.0543769	0.068335	RNAi Dependency
PDE2A	0.0544389	0.0546535	RNAi Dependency
FTL	0.0544508	-0.0498232	RNAi Dependency
ZFHX4	0.054454	0.066584	RNAi Dependency
TUBB	0.0545099	-0.122517	RNAi Dependency
INMT-MINDY4	0.054521	0.0564528	RNAi Dependency
DPP4	0.0545313	-0.0453209	RNAi Dependency
KCND1	0.0546229	0.0481425	RNAi Dependency
PDCD1	0.0546331	-0.0759299	RNAi Dependency
KAZALD1	0.0547029	-0.0693885	RNAi Dependency
C14orf93	0.0547828	0.0472599	RNAi Dependency
TRIM74	0.0547997	0.0417042	RNAi Dependency
GAS7	0.0548762	-0.0683586	RNAi Dependency
GPR12	0.0549066	0.0536769	RNAi Dependency
CNOT9	0.0550071	0.0927373	RNAi Dependency
CYP3A43	0.0550609	-0.0483338	RNAi Dependency
HDGF	0.0551149	-0.0739165	RNAi Dependency
GNL3	0.0551438	-0.088938	RNAi Dependency
LOC105369243&SULT1A4&SULT1A3	0.0551536	-0.051181	RNAi Dependency
PCDHAC1	0.0551683	-0.0455818	RNAi Dependency
TYROBP	0.0552412	-0.0593222	RNAi Dependency
CRLS1	0.0552423	0.0849478	RNAi Dependency
CWC25	0.055257	-0.0799067	RNAi Dependency
ALLC	0.0552861	0.0524152	RNAi Dependency
2019-12-01	0.055305	-0.0622336	RNAi Dependency
YIF1A	0.0553119	0.0686809	RNAi Dependency
XCL1	0.0553226	-0.057865	RNAi Dependency
MSANTD4	0.0553499	-0.0620727	RNAi Dependency
CLDN6	0.0553841	0.0649707	RNAi Dependency
CAPS2	0.0554083	0.0523653	RNAi Dependency
LOC107983965	0.0554159	0.071406	RNAi Dependency
CXXC1	0.0554686	0.110368	RNAi Dependency
RAB11FIP1	0.0555753	-0.0604811	RNAi Dependency
AVPR1B	0.0557226	-0.059177	RNAi Dependency
CARD18	0.0557287	-0.0972588	RNAi Dependency
HDAC2	0.0557738	0.0540912	RNAi Dependency
RBM12	0.0557961	-0.0429249	RNAi Dependency
MSGN1	0.0558097	-0.0495228	RNAi Dependency
PELI3	0.0558151	0.116397	RNAi Dependency
KCNMB3	0.0558323	0.0508424	RNAi Dependency
ADAMTSL2	0.0558939	-0.0671046	RNAi Dependency
SDHAP3	0.0559595	0.0480851	RNAi Dependency
HMGA2	0.0559769	0.072712	RNAi Dependency
DDX39A	0.0560261	-0.0644794	RNAi Dependency
TLK1	0.0560429	0.0553666	RNAi Dependency
FANCG	0.0561069	0.0524349	RNAi Dependency
GAPDH	0.0562033	0.109676	RNAi Dependency
HELZ2	0.0562762	0.0476123	RNAi Dependency
HSPA5	0.0562934	0.0841226	RNAi Dependency
EPCAM	0.0563248	0.0508769	RNAi Dependency
CDCA8	0.0563801	0.059994	RNAi Dependency
TBC1D3L&TBC1D3D&TBC1D3I&TBC1D3H	0.0564656	0.0508869	RNAi Dependency
ERN2	0.0564943	-0.052839	RNAi Dependency
KDELC1	0.056504	0.062553	RNAi Dependency
POP4	0.0565153	-0.0716174	RNAi Dependency
NANOS2	0.0566048	-0.0620688	RNAi Dependency
MRPS28	0.0566423	-0.0683205	RNAi Dependency
LOC105369252	0.0566437	0.0528874	RNAi Dependency
OR2W3	0.0566502	-0.0877685	RNAi Dependency
AMTN	0.0566813	0.0811967	RNAi Dependency
STX12	0.0567321	-0.055636	RNAi Dependency
LOC102724334	0.0567409	0.0410522	RNAi Dependency
DEFB1	0.0567765	0.0488682	RNAi Dependency
SMC3	0.0568102	0.151669	RNAi Dependency
ACP5	0.0569156	-0.0536854	RNAi Dependency
IFNAR2	0.0569566	-0.0357238	RNAi Dependency
OPN4	0.0570202	-0.046066	RNAi Dependency
PCDHGA3	0.057044	-0.063547	RNAi Dependency
PEX5	0.0571197	-0.0612818	RNAi Dependency
TOP3B	0.0571242	-0.0618656	RNAi Dependency
GRAP2	0.0571243	0.0375342	RNAi Dependency
TPO	0.0571312	0.0707163	RNAi Dependency
SCO1	0.057208	0.0538939	RNAi Dependency
TTC7B	0.0572429	0.0757877	RNAi Dependency
CST8	0.0572577	0.0604948	RNAi Dependency
IL5	0.0573354	-0.0503868	RNAi Dependency
TMEM204	0.0573666	-0.0705159	RNAi Dependency
TBC1D3K&TBC1D3C	0.0574108	0.0421042	RNAi Dependency
BECN1	0.0574327	-0.0595063	RNAi Dependency
TERF2	0.0574776	-0.0416862	RNAi Dependency
SCG3	0.0574788	-0.0472733	RNAi Dependency
H2AFB2&H2AFB1&H2AFB3	0.0575475	0.0624767	RNAi Dependency
MBLAC2	0.0575673	-0.0815305	RNAi Dependency
EIF4G2	0.0576648	0.134287	RNAi Dependency
NSUN5P2	0.0576662	0.0736852	RNAi Dependency
BRINP3	0.0577184	-0.0762606	RNAi Dependency
CYP2C9	0.0577348	-0.0653101	RNAi Dependency
FARP2	0.0577417	-0.0397534	RNAi Dependency
TAGLN	0.057791	0.0473786	RNAi Dependency
ARPC5	0.0578004	0.0484018	RNAi Dependency
NLRP14	0.057809	0.0764644	RNAi Dependency
USE1	0.0578136	0.0965669	RNAi Dependency
JAG1	0.0578164	0.0851403	RNAi Dependency
IBSP	0.0578744	-0.0645453	RNAi Dependency
C8orf48	0.0578803	-0.0804361	RNAi Dependency
KRTAP4-4	0.0579149	0.0769051	RNAi Dependency
UNC45A	0.0579691	-0.0529709	RNAi Dependency
GK5	0.0579901	0.0514726	RNAi Dependency
EID2	0.0580328	0.0546996	RNAi Dependency
ATP5J2-PTCD1	0.0580714	-0.0815495	RNAi Dependency
MRPL27	0.0580786	-0.0790474	RNAi Dependency
PDGFRA	0.0580949	-0.0535899	RNAi Dependency
SPATA31A6	0.0581644	-0.0847395	RNAi Dependency
GFRA2	0.0581745	0.0442002	RNAi Dependency
PPP1R10	0.0582036	-0.0629024	RNAi Dependency
NME1-NME2	0.0582662	0.0610414	RNAi Dependency
DUSP5	0.0582911	0.0534212	RNAi Dependency
SLX4	0.0582993	0.078912	RNAi Dependency
CLPTM1L	0.058317	-0.0765329	RNAi Dependency
POLR2E	0.0583903	-0.0799556	RNAi Dependency
ZNF225	0.058411	-0.0492982	RNAi Dependency
ACD	0.058415	-0.069564	RNAi Dependency
LIG4	0.0584894	-0.0433745	RNAi Dependency
TBC1D32	0.0585103	-0.0965682	RNAi Dependency
ARHGAP45	0.0585197	-0.0522111	RNAi Dependency
PABPC1	0.0585516	0.0950294	RNAi Dependency
PPP1R2	0.0586502	-0.0464955	RNAi Dependency
POFUT2	0.0586597	0.0580944	RNAi Dependency
OR8U9	0.0586793	-0.0537581	RNAi Dependency
TSNARE1	0.058744	0.0713219	RNAi Dependency
B4GALNT3	0.0587461	-0.053192	RNAi Dependency
TMEM109	0.0588642	-0.0608808	RNAi Dependency
[truncated: 110,674 more rows]

## Sheet: S5 Cell line information
Cell line	Primary reference	Annotation in primary reference	General Classification	Specimen site	Pre-biopsy treatment	Pubmed citations as of June 4, 2012	Fraction of the genome altered (threshold 0.3)	Fraction of the genome altered (threshold 0.2)	Correlation with mean CNA of HGSOC tumor samples	Highest correlation with CNA of single HGSOC tumor sample	Median correlation with CNA of HGSOC tumor samples	Total number of mutations	Mutations per Mb	Hyper-mutated (1=yes, 0=no)	TP53 mutation (1=yes, 0=no)	Mutation count in seven "non-HGSOS" genes (ARID1A, BRAF, CTNNB1, ErbB2, KRAS, PIK3CA, PTEN)	Genotype 20 genes (alterations in sequence and putative copy number for Akt1/2/3, ARID1A, BRCA1/2, BRAF, C11ORF30, CCNE1, CTNNB1, ErbB2, KRAS, MAP2K4, MYC, NF1, Notch3, PIK3CA, PTEN, Rb1, TP53)	MLH1 silencing (1=yes, 0=no)	Tissue of origin according to mRNA expression-based clustering	Score	AKT1	AKT2	AKT3	ARID1A	BRAF	BRCA1	BRCA2	C11ORF30	CCNE1	CTNNB1	ErbB2	KRAS	MAP2K4	MYC	NF1	Notch3	PIK3CA	PTEN	Rb1	TP53	HNF1B Exp.	PAX8 Exp.
KURAMOCHI	Motoyama T. [Biological characterization including sensitivity to mitomycin C of cultured human ovarian cancers (author's transl)]. Nihon Sanka Fujinka Gakkai Zasshi 1981;33:1197-204. Japanese. Motoyama T. [Quantitative analysis on in vitro drug sensitivity of cultured human ovarian cancer cell lines (author's transl)]. Nihon Sanka Fujinka Gakkai Zasshi 1982;34:308-14. Japanese.	undifferentiated carcinoma	High grade serous adenocarcinoma	NS	NS	6	0.54	0.9	0.578277	0.522768	0.29399	64	5.32222	0	1	0	Akt2/3 gain, ARID1A gain, BRAF gain, BRCA1 hetloss, BRCA2 mut (ns), CCNE1 gain, CTNNB1 hetloss, ErbB2 hetloss, KRAS amp, MYC amp, NF1 homdel, Notch3 hetloss, PTEN hetloss, TP53 mut (ms)	0	ovary	1.57828		Gain	Gain	Gain	Gain	Hetloss	mut (ns)		Gain	Hetloss	Hetloss	Amp		Amp	Homdel	Hetloss		Hetloss		mut (ms)	Low	High
OVSAHO	Yanagibashi T, Gorai I, Nakazawa T, Miyagi E, Hirahara F, Kitamura H, et al. Complexity of expression of the intermediate filaments of six new human ovarian carcinoma cell lines: new expression of cytokeratin 20. Br J Cancer 1997;76:829-35.	papillary serous adenocarcinoma	High grade serous adenocarcinoma	metastatic deposit	5-fluorouracil, doxorubicin, mitomycin C, toyomycin, cyclophosphamide, adriamycin, cisplatin	4	0.43	0.89	0.544733	0.478961	0.248741	62	4.31636	0	1	0	Akt1/3 gain, BRAF gain, BRCA2 homdel, CCNE1 gain, MAP2K4 hetloss, MYC gain, Notch3 gain, PIK3CA gain, PTEN gain, Rb1 homdel, TP53 mut (ns) and hetloss	0	ovary	1.54473	Gain		Gain		Gain		Homdel		Gain				Hetloss	Gain			Gain	Gain	Homdel	Hetloss mut (ns)	Low	Medium
SNU119	Yuan Y, Kim WH, Han HS, Lee JH, Park HS, Chung JK, et al. Establishment and characterization of human ovarian carcinoma cell lines. Gynecol Oncol 1997;66:378-87.	serous cystoadenocarcinoma	High grade serous adenocarcinoma	ascites	cyclophosphamide, adriamycin, cisplatin, 5-fluorouracil	1	0.74	0.75	0.536927	0.462369	0.266524	61	4.05132	0	1	0	Akt1 hetloss, Akt2/3 gain, BRAF gain, BRCA2 hetloss, C11ORF30 gain, CTNNB1 hetloss, KRAS gain, MAP2K4 hetloss, MYC mut (ms) and amp, NF1 homdel, Notch3 gain, PIK3CA gain, PTEN hetloss, Rb1 amp, TP53 mut (ms) and hetloss	0	ovary	1.53693	Hetloss	Gain	Gain		Gain		Hetloss	Gain		Hetloss		Gain	Hetloss	mut (ms)	Homdel	Gain	Gain	Hetloss	Amp	Hetloss mut (ms)	Low	High
COV362	van den Berg-Bakker CA, Hagemeijer A, Franken-Postma EM, Smit VT, Kuppen PJ, van Ravenswaay Claasen HH, et al. Establishment and characterization of 7 ovarian carcinoma cell lines and one granulosa tumor cell line: growth features and cytogenetics. Int J Cancer 1993;53:613-20.	endometrioid carcinoma	High grade serous adenocarcinoma	pleural effusion	none	7	0.37	0.46	0.521673	0.460436	0.243456	54	4.09297	0	1	0	ARID1A hetloss, BRAF gain, BRCA1 mut (ss and fs) and hetloss, BRCA2 hetloss, C11ORF30 gain, ErbB2 hetloss, MAP2K4 hetloss, MYC amp, NF1 hetloss, PTEN gain, Rb1 homdel, TP53 mut (ms) and hetloss	0	ovary	1.52167				Hetloss	Gain	Hetloss mut (ss fs)	Hetloss	Gain			Hetloss		Hetloss	Amp	Hetloss			Gain	Homdel	Hetloss mut(ms)	Medium	Medium/Low
OVCAR4	Green JA, Vistica DT, Young RC, Hamilton TC, Rogan AM, Ozols RF. Potentiation of melphalan cytotoxicity in human ovarian cancer cell lines by glutathione depletion. Cancer Res 1984;44:5427-31.	adenocarcinoma	High grade serous adenocarcinoma	ascites?	cyclophosphamide, adriamycin, cisplatin	29	0.7	0.76	0.463371	0.460295	0.249801	65	4.63354	0	1	0	Akt2/3 gain, BRAF gain, BRCA1/2 hetloss, CCNE1 gain, CTNNB1 hetloss, ErbB2 hetloss, MAP2K4 hetloss, MYC gain, NF1 hetloss, Notch3 gain, PTEN gain, Rb1 hetloss, TP53 mut (ms) and hetloss	0	ovary	1.46337		Gain	Gain		Gain	Hetloss	Hetloss		Gain	Hetloss	Hetloss		Hetloss	Gain	Hetloss	Gain		Gain	Hetloss	Hetloss mut(ms)	Medium	Medium
COV318	van den Berg-Bakker CA, Hagemeijer A, Franken-Postma EM, Smit VT, Kuppen PJ, van Ravenswaay Claasen HH, et al. Establishment and characterization of 7 ovarian carcinoma cell lines and one granulosa tumor cell line: growth features and cytogenetics. Int J Cancer 1993;53:613-20.	serous carcinoma	High grade serous adenocarcinoma	ascites	none	0	0.45	0.77	0.460862	0.482502	0.19683	44	3.1205	0	1	0	Akt1/2/3 gain, ARID1A gain, BRAF gain, C11ORF30 gain, CCNE1 amp, CTNNB1 hetloss, KRAS hetloss, MAP2K4 hetloss, PIK3CA gain, TP53 mut (ms) and hetloss	0	ovary	1.46086	Gain	Gain	Gain	Gain	Gain			Gain	Amp	Hetloss		Hetloss	Hetloss				Gain			Hetloss mut (ms)		Medium/High
JHOS4	RIKEN BRC - unpublished data, originated by Ishikawa H and Yasuda M.	serous cystadenocarcinoma	High grade serous adenocarcinoma	NS	NS	0	0.6	0.67	0.427526	0.351745	0.197973	56	4.1286	0	1	0	Akt2/3 gain, ARID1A hetloss, BRAF gain, BRCA2 gain, C11ORF30 gain, CCNE1 gain, MAP2K4 hetloss, MYC mut (ms) and gain, NF1 hetloss, Notch3 gain, PIK3CA gain, PTEN gain, Rb1 gain, TP53 mut (ms) and hetloss	0	ovary	1.42753		Gain	Gain	Hetloss	Gain		Gain	Gain	Gain				Hetloss	Gain mut(ms)	Hetloss	Gain	Gain	Gain	Gain	Hetloss mut (ms)	Medium	Medium/Low
JHOS2	Yamada K, Tachibana T, Hashimoto H, Suzuki K, Yanagida S, Endoh H, et al. Establishment and characterization of cell lines derived from serous adenocarcinoma (JHOS-2) and clear cell adenocarcinoma (JHOC-5, JHOC-6) of human ovary. Hum Cell 1999;12:131-8.	serous adenocarcinoma	High grade serous adenocarcinoma	ovary	none	2	0.43	0.58	0.343853	0.351977	0.179774	67	4.31388	0	1	0	Akt2/3 hetloss, BRCA1 mut (ms), C11ORF30 gain, CTNNB1 gain, MAP2K4 hetloss, MYC gain, NF1 mut (ms), PIK3CA gain, TP53 mut (ss) and hetloss	0	ovary	1.34385		Hetloss	Hetloss			mut (ms)		Gain					Hetloss	Gain	mut (ms)		Gain			mut (ss)	Low	Medium
CAOV3	ATCC - unpublished data deposited by J. Fogh (isolated 1976).	adenocarcinoma	High grade serous adenocarcinoma	NS	NS	278	0.69	0.86	0.333664	0.330711	0.160514	49	3.75822	0	1	0	Akt1/2 gain, BRAF gain, BRCA1 hetloss, BRCA2 gain, C1130ORF gain, CTNNB1 hetloss, ErbB2 hetloss, KRAS hetloss, MAP2K4 hetloss, NF1 hetloss, PIK3CA amp, PTEN gain, Rb1 hetloss, TP53 mut (ns) and hetloss	0	mixed	1.33366	Gain	Gain			Gain	Hetloss	Gain	Gain		Hetloss	Hetloss	Hetloss	Hetloss		Hetloss		Amp	Gain	Hetloss	Hetloss mut (ms)	Low	Medium/Low
FUOV1	Emoto M, Oshima K, Ishiguro M, Iwasaki H, Kawarabayashi T, Kikuchi M. Establishment and characterization of a serous papillary adenocarcinoma cell line of the human ovary in a serum-free culture. Pathol Res Pract 1999;195:237-42.	poorly differentiated serous papillary adenocarcinoma	High grade serous adenocarcinoma possible mixed	ovary	none	1	0.56	0.57	0.296977	0.334265	0.157024	71	5.04701	0	1	0	Akt1/2 gain, ARID1A hetloss, BRCA1 gain, CCNE1 amp, CTNNB1 hetloss, ErbB2 gain, KRAS gain, NF1 muts (ms and ms) and homdel, MAP2K4 hetloss, MYC amp, Notch3 hetloss, PIK3CA gain, Rb1 hetloss, TP53 mut (ms)	1	ovary/endometrium	1.29698	Gain	Gain		Hetloss		Gain				Hetloss	Gain	Gain	Hetloss	Amp	Homdel mut (ms ms)	Hetloss	Gain		Hetloss	mut (ms)	High	High
ES2	Lau DH, Lewis AD, Sikic BI. Association of DNA cross-linking with potentiation of the morpholino derivative of doxorubicin by human liver microsomes. J Natl Cancer Inst 1989;81:1034-8. Masters J, Palsson B, editors. Human Cell Culture: Volume II, Cancer Cell Lines Part 2, Springer; 1999.	poorly differentiated clear cell carcinoma	clear cell possible mixed serous	NS	NS	128	0.28	0.38	0.437694	0.398816	0.225956	83	5.99875	0	1	1	Akt2 hetloss, BRAF mut (ms) and gain, BRCA2 hetloss, CCNE1 hetloss, KRAS hetloss, MAP2K4 gain, MYC gain, Rb1 hetloss, TP53 mut (ms)	0	mixed	1.29484		Hetloss			mut (ms)		Hetloss		Hetloss			Hetloss	Gain	Gain					Hetloss	mut (ms)	Low	Low
SNU8	Yuan Y, Kim WH, Han HS, Lee JH, Park HS, Chung JK, et al. Establishment and characterization of human ovarian carcinoma cell lines. Gynecol Oncol 1997;66:378-87.	serous cystoadenocarcinoma	High grade serous adenocarcinoma	ovary	cyclophosphamide, adriamycin, cisplatin	2	0.6	0.59	0.413314	0.450891	0.188655	44	2.98506	0	1	1	Akt1/2/3 gain, BRAF gain, BRCA1 gain, BRCA2 hetloss, CCNE1 amp, CTNNB1 hetloss, ErbB2 gain, KRAS mut (ms), MAP2K4 hetloss, NF1 gain, Notch3 hetloss, PTEN hetloss, Rb1 hetloss, TP53 mut (fs) and hetloss	0	ovary	1.27046	Gain	Gain	Gain		Gain	Gain	Hetloss		Amp	Hetloss	Gain	mut (ms)	Hetloss		Gain	Hetloss		Hetloss	Hetloss	Hetloss mut (fs)	Low	Medium
COV504	van den Berg-Bakker CA, Hagemeijer A, Franken-Postma EM, Smit VT, Kuppen PJ, van Ravenswaay Claasen HH, et al. Establishment and characterization of 7 ovarian carcinoma cell lines and one granulosa tumor cell line: growth features and cytogenetics. Int J Cancer 1993;53:613-20.	serous carcinoma	High grade serous adenocarcinoma	pleural effusion	none	0	0.34	0.56	0.253185	0.341322	0.109424	43	3.16364	0	1	0	Akt1/2 hetloss, BRAF gain, BRCA1 hetloss, CCNE1 hetloss, CTNNB1 hetloss, ErbB2 gain, MAP2K4 hetloss, MYC gain, NF1 amp, Notch3 hetloss, PIK3CA gain, TP53 mut (fs) and hetloss	0	ovary	1.25318	Hetloss	Hetloss			Gain	Hetloss			Hetloss	Hetloss	Gain		Hetloss	Gain	Amp	Hetloss	Gain			Hetloss mut (fs)		Medium
RMUGS	Sakayori M, Nozawa S, Udagawa Y, Chin K, Lee SG, Sakuma T, et al. [Biological properties of two newly established cell lines (RMUG-S, RMUG-L) from a human ovarian mucinous cystadenocarcinoma]. Hum Cell 1990;3:52-6.	mucinous cystoadenocarcinoma	Mucinous	NS	NS	11	0.33	0.33	0.148019	0.272787	0.0821274	60	4.91101	0	1	0	Akt2 gain, ARID1A hetloss, BRAF hetloss, CCNE1 gain, CTNNB1 hetloss, MAP2K4 hetloss, Notch3 hetloss, PTEN hetloss, TP53 mut (ms) and hetloss	0	mixed	1.14802		Gain		Hetloss	Hetloss				Gain	Hetloss			Hetloss			Hetloss		Hetloss		Hetloss mut (ms)	Low	Low
JHOM1	RIKEN BRC - unpublished data, originated by Ishikawa H and Yasuda M.	mucinous adenocarcinoma	Mucinous	NS	NS	0	0.34	0.77	0.126847	0.313677	0.0998521	40	2.66024	0	1	1	Akt1 gain, BRAF hetloss, C11ORF30 amp, CCNE1 mut (ms), KRAS gain, MYC gain, Notch3 hetloss, PTEN mut (fs), Rb1 mut (ms), TP53 mut (ns)	0	mixed	0.983989	Gain				Hetloss			Amp	mut (ms)			Gain		Gain		Hetloss		mut (fs)	mut (ms)	mut (ns)	Low	Medium
OVCAR8	Schilder RJ, Hall L, Monks A, Handel LM, Fornace AJ, Jr., Ozols RF, et al. Metallothionein gene expression and resistance to cisplatin in human ovarian cancer. Int J Cancer 1990;45:416-22.	NS	High grade serous adenocarcinoma	NS	carboplatin	58	0.34	0.94	0.184387	0.264893	0.0570525	74	5.79698	0	1	3	Akt3 gain, ARID1A hetloss, C11ORF30 gain, CCNE1 gain, CTNNB1 mut (ms), ErbB2 mut (ms), KRAS mut (ms), MYC gain, TP53 mut (ss)	0	lung	0.755815			Gain	Hetloss				Gain	Gain	mut (ms)	mut (ms)	mut (ms)	Gain	Gain						mut (ss)	Medium/Low	Medium/High
EFO21	Simon WE, Albrecht M, Hansel M, Dietel M, Holzel F. Cell lines derived from human ovarian carcinomas: growth stimulation by gonadotropic and steroid hormones. J Natl Cancer Inst 1983;70:839-45.	dedifferentiated serous cystadenocarcinoma	Clear cell	ascites	NS	16	0.6	0.63	0.340976	0.414501	0.171397	40	3.31333	0	0	0	Akt3 gain, BRCA2 hetloss, C11ORF30 gain, CCNE1 gain, CTNNB1 hetloss, ErbB2 gain, KRAS hetloss, MYC gain, NF1 homdel, Notch3 gain, PIK3CA gain, Rb1 homdel	0	ovary/endometrium	0.340976			Gain				Hetloss	Gain	Gain	Hetloss	Gain	Hetloss		Gain	Homdel	Gain	Gain		Homdel		Medium	Medium/High
JHOC5	Yamada K, Tachibana T, Hashimoto H, Suzuki K, Yanagida S, Endoh H, et al. Establishment and characterization of cell lines derived from serous adenocarcinoma (JHOS-2) and clear cell adenocarcinoma (JHOC-5, JHOC-6) of human ovary. Hum Cell 1999;12:131-8.	clear cell adenocarcinoma	Clear cell	pelvis	cyclophosphamide, cisplatin	5	0.57	0.73	0.262058	0.28022	0.119509	65	4.3056	0	0	0	Akt3 gain, ARID1A gain, BRCA1 amp, BRCA2 hetloss, CCNE1 gain, CTNNB1 hetloss, ErbB2 gain, KRAS gain, MAP2K4 hetloss, MYC gain, NF1 gain, Notch3 hetloss, PTEN hetloss, Rb1 hetloss, TP53 hetloss	0	ovary/endometrium	0.262058			Gain	Gain		Gain	Hetloss		Gain	Hetloss	Gain	Gain	Hetloss	Gain	Gain	Hetloss		Hetloss	Hetloss	Hetloss	High	High
COLO704	DSMZ - unpublished data deposited by G. Moore.	adenocarcinoma	endometrioid? (expression clusters with A2780 and COV434)	ascites stemming from colon metastasis	NS	1	0.2	0.21	0.338296	0.471215	0.165335	126	9.48123	0	0	1	Akt2 gain, Akt3 homdel, BRAF gain, CCNE1 gain, MYC gain, Notch3 gain, PTEN mut (ns), Rb1 mut (fs)	1	lung	0.195439		Gain			Gain				Gain					Gain		Gain		mut (ns)	mut (fs)		Low	Low
OVISE	Yanagibashi T, Gorai I, Nakazawa T, Miyagi E, Hirahara F, Kitamura H, et al. Complexity of expression of the intermediate filaments of six new human ovarian carcinoma cell lines: new expression of cytokeratin 20. Br J Cancer 1997;76:829-35.	clear cell adenocarcinoma	Clear cell	pelvic mass	cyclophosphamide, adriamycin, cisplatin	5	0.46	0.49	0.288357	0.402903	0.168205	59	5.48695	0	0	1	Akt2 gain, ARID1A mut (fs), BRAF hetloss, BRCA1 gain, BRCA2 hetloss, C11ORF30 hetloss, CCNE1 gain, CTNNB1 hetloss, ErbB2 gain, MAP2K4 hetloss, MYC gain, NF1 gain, PIK3CA gain, Rb1 hetloss, TP53 hetloss	0	ovary/endometrium	0.1455		Gain		mut (fs)	Hetloss	Gain	Hetloss		Gain	Hetloss	Gain		Hetloss	Gain	Gain		Gain		Hetloss	Hetloss	High	High
OAW42	Wilson AP, Dent M, Pejovic T, Hubbold L, Radford H. Characterisation of seven human ovarian tumour cell lines. Br J Cancer 1996;74:722-7. Wilson AP. Characterization of a cell line derived from the ascites of a patient with papillary serous cystadenocarcinoma of the ovary. J Natl Cancer Inst 1984;72:513-21.	papillary serous cystadenocarcinoma	Serous possible Clear cell? endometrioid?	ascites	cisplatin	26	0.43	0.67	0.429238	0.416743	0.24073	49	3.27943	0	0	2	Akt3 gain, ARID1A mut (fs) and gain, BRCA1 gain, ErbB2 gain, KRAS hetlos, MYC gain, PIK3CA mut (ms) and gain, PTEN hetloss	0	ovary/endometrium	0.143523			Gain	mut (fs)		Gain					Gain	Hetloss		Gain			mut (ms)	Hetloss			High	Medium
OVTOKO	Yanagibashi T, Gorai I, Nakazawa T, Miyagi E, Hirahara F, Kitamura H, et al. Complexity of expression of the intermediate filaments of six new human ovarian carcinoma cell lines: new expression of cytokeratin 20. Br J Cancer 1997;76:829-35.	clear cell adenocarcinoma	Clear cell	spleen	cyclophosphamide, adriamycin, cisplatin	5	0.18	0.44	0.080517	0.256094	0.0665542	67	5.04516	0	0	0	C11ORF30 gain	0	ovary/endometrium	0.080517								Gain													High	High
RMGI	Nozawa S, Tsukazaki K, Sakayori M, Jeng CH, Iizuka R. Establishment of a human ovarian clear cell carcinoma cell line (RMG-I) and its single cell cloning--with special reference to the stem cell of the tumor. Hum Cell 1988;1:426-35.	clear cell adenocarcinoma	Clear cell	ascites	NS	25	0.24	0.24	0.0259636	0.181917	0.0132303	37	3.77893	0	0	0	Akt1/2 gain, Akt3 hetloss, BRCA1 gain, BRCA2 hetloss, CCNE1 homdel, ErbB2 amp, MAP2K4 homdel, Rb1 gain, TP53 homdel	0	ovary/endometrium	0.0259636	Gain	Gain	Hetloss			Gain	Hetloss		Homdel		Amp		Homdel						Gain	Homdel	High	High
HEYA8	Buick RN, Pullano R, Trent JM. Comparative properties of five human ovarian adenocarcinoma cell lines. Cancer Res 1985;45:3668-76.	moderately differentiated papillary cystadenocarcinoma	Low grade serous	peritoneal deposit	NS	67	0.21	0.41	0.276206	0.468046	0.176624	56	3.92837	0	0	2	BRAF1 mut (ms) and hetloss, C11ORF30 gain, KRAS mut (ms) and gain, MYC gain, NF1 hetloss, PIK3CA gain	0	mixed	-0.00950852												mut (ms)		Gain	Hetloss		Gain				Low	Medium
COV434	van den Berg-Bakker CA, Hagemeijer A, Franken-Postma EM, Smit VT, Kuppen PJ, van Ravenswaay Claasen HH, et al. Establishment and characterization of 7 ovarian carcinoma cell lines and one granulosa tumor cell line: growth features and cytogenetics. Int J Cancer 1993;53:613-20.	granulosa cell tumor	endometrioid	ovary	none	23	0	0	-0.00467032	0.0771059	-0.0148081	51	4.15459	0	0	1	ARID1A mut (ms)	0	lung	-0.147527				mut (ms)																	Low	Low
SKOV3	Originated by G. Trempe. Fogh J, Wright WC, Loveless JD. Absence of HeLa cell contamination in 169 cell lines derived from human tumors. J Natl Cancer Inst 1977;58:209-14, Fogh J, Fogh JM, Orfeo T. One hundred and twenty-seven cultured human tumor cell lines producing tumors in nude mice. J Natl Cancer Inst 1977;59:221-6, Uhl-Steidl M, Muller-Holzner E, Zeimet AG, Adolf GR, Daxenbichler G, Marth …	moderately well-differentiated adenocarcinoma	endometrioid (possibly mixed with clear cell)	ascites	thiothepa	2101	0.14	0.17	-0.0462727	0.226135	-0.0161278	82	5.93151	0	0	2	ARID1A mut (ns), BRAF hetloss, CTNNB1 hetloss, ErbB2 amp, KRAS gain, MAP2K4 hetloss, NF1 mut (ms), PIK3CA mut (ms), PTEN hetloss, TP53 hetloss	1	ovary	-0.331987				mut (ns)	Hetloss					Hetloss	Amp	Gain	Hetloss		mut (ms)		mut (ms)	Hetloss		Hetloss	Medium/High	Medium
A2780	Eva A, Robbins KC, Andersen PR, Srinivasan A, Tronick SR, Reddy EP, et al. Cellular genes analogous to retroviral onc genes are transcribed in human tumour cells. Nature 1982;295:116-9.	NS	endometrioid	NS	none	1363	0.07	0.07	0.201876	0.415447	0.0914408	70	4.59265	0	0	4	Akt3 gain, ARID1A muts (ns and fs), BRAF mut (ms), Notch3 mut (ms), PIK3CA mut (ms), PTEN mut (del)	1	mixed	-0.369552			Gain	mut (ns fs)	mut (ms)											mut (ms)	mut (ms)	mut (del)			Low	Low
IGROV1	Benard J, Da Silva J, De Blois MC, Boyer P, Duvillard P, Chiric E, et al. Characterization of a human ovarian adenocarcinoma line, IGROV1, in tissue culture and in nude mice. Cancer Res 1985;45:4970-9.	mainly endometrioid carcinoma with serous, clear cell and undifferentiated areas	endometroid and clear cell	ovary	none	255	0.04	0.11	0.226462	0.27347	0.0965642	290	20.6577	1	1	3	ARID1A muts (fs and fs), BRCA1 mut (fs), BRCA2 mut (ms), Notch3 mut (ms), PIK3CA muts (ms and nonstop), PTEN muts (ms and fs), TP53 mut (ms)	1	ovary/endometrium	-1.20211				mut (fs fs)		mut (fs)	mut (ms)									mut (ms)	mut (ms nonstop)	mut (ms fs)		mut (ms)	High	High
EFO27	Simon WE, Albrecht M, Hansel M, Dietel M, Holzel F. Cell lines derived from human ovarian carcinomas: growth stimulation by gonadotropic and steroid hormones. J Natl Cancer Inst 1983;70:839-45.	moderately differentiated serous papillary adenocarcinoma	endometrioid	omentum	NS	20	0.13	0.14	0.0409759	0.312477	0.0350264	225	16.1443	1	1	4	ARID1A muts (fs and ns), ErbB2 mut (ms), MYC mut (ms), NF1 mut (ms), PIK3CA mut (ms), PTEN mut (fs), TP53 muts (ms and ss)	0	ovary	-1.53045				mut (fs ns)							mut (ms)			mut (ms)	mut (ms)		mut (ms)	mut (fs)		mut (ms ss)	Medium	High
TOV21G	Provencher DM, Lounis H, Champoux L, Tetrault M, Manderson EN, Wang JC, et al. Characterization of four novel epithelial ovarian cancer cell lines. In Vitro Cell Dev Biol Anim 2000;36:357-61.	clear cell adenocarcinoma	Clear cell	ovary	none	42	0.05	0.05	0.0514681	0.308213	0.033298	180	13.4212	1	0	5	ARID1A muts (fs and fs), CTNNB1 mut (fs), KRAS mut (ms), PIK3CA mut (ms), PTEN muts (fs and fs) and gain	1	ovary/endometrium	-2.66282				mut (fs fs)						mut (fs)		mut (ms)					mut (ms)	Gain mut (fs fs)			High	High
OV7	Boocock et al., (1995) Expression of vascular endothelial growth factor and its receptors flt and KDR in ovarian carcinoma.	poorly differentiatied epithelial	Mixed - serous and clear cell	ovary	chlorambucil	0																																			Low	Low
COV644	van den Berg-Bakker CA, Hagemeijer A, Franken-Postma EM, Smit VT, Kuppen PJ, van Ravenswaay Claasen HH, Cornelisse CJ, Schrier PI 1993 Establishment and characterization of 7 ovarian carcinoma cell lines and one granulosa tumor cell line: growth features and cytogenetics	epithelial-mucinous carcinoma	mucinous	ovary	NS	0																																			Medium	Low
OV90	ATCC - Provencher DM et al. Characterization of four novel epithelial cancer cell lines in vitro	malignant papillary serous adenocarcinoma	High grade serous adenocarcinoma	NS	none	1																																			Medium	Low
OC314	Alama A, Barbieri F, Favre A, Cagnoli M, Noviello E Establishment and characterization of three new cell lines derived from the ascites of human ovarian carcinomas	cystoadenocarcinoma, low differentiated papillary serous	clear cell possible mixed serous	ascites	none	1																																			Medium	Medium

## Sheet: S6 EGLN1-KO RNA Seq
id	Description	Signal to noise	ES2_1	ES2cas9_1	OVISE_1	OVISEcas9_1	ES2cas9_2	ES2cas9_3	OVISEcas9_2	OVISEcas9_3
EGLN1	na	na	WT	WT	WT	WT	KO	KO	KO	KO
Comparison	na	na	A	A	A	A	B	B	B	B
KIAA1324	KIAA1324 (ENSG00000116299)	2.45	-2.18	-2	-2.25	-2.4	-3	-3	-2.74	-3
TAF1B	TAF1B (ENSG00000115750)	2.16	4.9	4.86	4.95	4.83	4.57	4.62	4.67	4.71
PINX1	PINX1 (ENSG00000254093)	1.95	4.4	4.08	4.41	4.01	3.78	3.7	3.76	3.71
APOC3	APOC3 (ENSG00000110245)	1.86	-0.14	-2.56	-0.1	-0.09	-3	-3	-3	-3
CAND1	CAND1 (ENSG00000111530)	1.73	5.64	5.57	5.66	5.65	5.36	5.45	5.47	5.52
SOS1-IT1	SOS1-IT1 (ENSG00000229692)	1.66	0.03	-0.36	-0.29	-0.6	-0.84	-0.97	-1.15	-0.89
HSPE1P3	HSPE1P3 (ENSG00000259746)	1.65	0.23	0.12	0.66	0.03	-0.4	-3	-3	-3
GMPSP1	GMPSP1 (ENSG00000250471)	1.61	-0.54	-0.86	-0.42	-0.07	-1.64	-3	-2.4	-1.47
PMPCB	PMPCB (ENSG00000105819)	1.6	5.76	5.77	5.66	5.67	5.6	5.61	5.58	5.59
TRIM36	TRIM36 (ENSG00000152503)	1.56	1.23	1.21	1.35	1.14	0.93	1.05	0.9	0.75
PSMC1	PSMC1 (ENSG00000100764)	1.5	7.86	7.95	7.88	7.89	7.82	7.73	7.66	7.7
EXOSC10	EXOSC10 (ENSG00000171824)	1.5	5.66	5.61	5.65	5.61	5.36	5.42	5.46	5.58
SMYD5	SMYD5 (ENSG00000135632)	1.49	4.63	4.47	4.34	4.46	4.11	4.25	4.17	4.25
SLC25A19	SLC25A19 (ENSG00000125454)	1.48	4.41	4.17	4.27	4.01	3.87	3.93	3.95	3.9
MCFD2P1	MCFD2P1 (ENSG00000237154)	1.48	-3	0.15	-0.34	-0.38	-3	-3	-3	-3
RRS1	RRS1 (ENSG00000179041)	1.47	5.94	5.93	6.06	5.93	5.72	5.66	5.81	5.83
RN7SL49P	RN7SL49P (ENSG00000265802)	1.46	-3	-1.25	-0.74	-0.76	-3	-3	-3	-3
RN7SL574P	RN7SL574P (ENSG00000266075)	1.46	-3	-1.25	-0.71	-0.76	-3	-3	-3	-3
LINC00843	LINC00843 (ENSG00000178440)	1.44	-1.18	-1.03	-1.36	-0.94	-2.12	-1.56	-2.32	-3
BLCAP	BLCAP (ENSG00000166619)	1.43	4.63	4.54	4.67	4.61	4.47	4.47	4.52	4.51
SFMBT1	SFMBT1 (ENSG00000163935)	1.38	2.76	2.75	2.78	2.59	2.3	2.58	2.42	2.46
MRPL50	MRPL50 (ENSG00000136897)	1.37	4.65	4.51	4.42	4.6	4.4	4.35	4.36	4.33
TICRR	TICRR (ENSG00000140534)	1.37	2.81	2.63	2.53	2.44	2.3	2.36	2.36	2.36
RN7SL809P	RN7SL809P (ENSG00000241217)	1.36	-0.94	-0.23	0.29	-0.76	-1.03	-3	-3	-3
HSP90AA1	HSP90AA1 (ENSG00000080824)	1.35	10.99	11.07	11.08	10.65	10.67	10.63	10.61	10.6
NBPF20	NBPF20 (ENSG00000162825)	1.35	-1.4	-3	-1.69	-0.69	-3	-3	-3	-3
C9orf153	C9orf153 (ENSG00000187753)	1.35	-2.18	-3	-1.89	-1.89	-3	-3	-2.94	-3
CSTF2	CSTF2 (ENSG00000101811)	1.35	4.79	4.78	4.84	4.85	4.49	4.45	4.63	4.75
SPDYE12P	SPDYE12P (ENSG00000184616)	1.32	-3	-2.32	-2.64	-2.32	-3	-3	-3	-3
RPL13AP6	RPL13AP6 (ENSG00000234118)	1.32	-2.18	-3	-1.94	-2.25	-3	-3	-3	-2.94
POLR2D	POLR2D (ENSG00000144231)	1.32	5.55	5.48	5.49	5.25	5.19	5.24	5.24	5.26
NIP7	NIP7 (ENSG00000132603)	1.31	5.86	5.85	5.86	5.86	5.63	5.63	5.75	5.85
TRIM35	TRIM35 (ENSG00000104228)	1.31	2.01	2.38	2.3	2.41	1.93	2	1.79	1.94
EMBP1	EMBP1 (ENSG00000231752)	1.31	-2.4	-1.94	-1.74	-3	-3	-3	-3	-3
CTDSPL2	CTDSPL2 (ENSG00000137770)	1.3	4.12	3.83	4.39	3.88	3.69	3.57	3.7	3.63
NETO2	NETO2 (ENSG00000171208)	1.29	5.75	5.34	5.45	5.5	4.98	4.9	5.24	5.18
RPL35P1	RPL35P1 (ENSG00000237991)	1.29	-0.43	1.24	0.69	1.3	-0.94	-0.97	-0.27	-0.89
ZNF195	ZNF195 (ENSG00000005801)	1.27	4.11	4.3	4.26	4.19	3.97	3.91	4.08	4.06
SLC16A10	SLC16A10 (ENSG00000112394)	1.27	1.6	0.93	1.34	1.21	-0.27	0.41	0.52	0.77
ZNF708	ZNF708 (ENSG00000182141)	1.26	1.32	1.34	1.61	1.43	1.14	1.04	1.21	1.23
NOL9	NOL9 (ENSG00000162408)	1.23	3.01	2.98	3.4	2.99	2.7	2.77	2.69	2.84
HSPE1P2	HSPE1P2 (ENSG00000258645)	1.23	1.18	1.18	1.12	0.07	-1.18	-1.22	0.06	-3
MAGOH3P	MAGOH3P (ENSG00000270975)	1.21	-2.74	-3	-2.32	-2.32	-3	-3	-3	-3
RBSN	RBSN (ENSG00000131381)	1.21	3.05	2.9	3.15	2.87	2.73	2.66	2.6	2.84
ATP5C1P1	ATP5C1P1 (ENSG00000224004)	1.21	-2.32	-3	-2.56	-2.56	-3	-3	-2.94	-3
SOAT1	SOAT1 (ENSG00000057252)	1.2	5.45	5.58	5.84	5.19	5.14	5.08	5.09	5.19
PPP3R1	PPP3R1 (ENSG00000221823)	1.19	5.48	5.42	5.55	5.21	5.16	5.22	5.2	5.24
BMS1P12	BMS1P12 (ENSG00000224599)	1.18	0.33	-0.3	-3	-1.89	-3	-3	-3	-3
ZNF506	ZNF506 (ENSG00000081665)	1.18	2.25	2.04	1.91	2.19	1.68	1.76	1.89	1.88
EHMT1	EHMT1 (ENSG00000181090)	1.17	4.19	4.21	4.18	4.37	3.75	4.06	4.03	4.01
ING5	ING5 (ENSG00000168395)	1.16	3.9	3.4	3.72	3.51	3.11	3.09	3.4	3.24
TRIM21	TRIM21 (ENSG00000132109)	1.13	3.08	3.02	3.41	2.88	2.83	2.79	2.84	2.82
UBE2SP2	UBE2SP2 (ENSG00000224126)	1.13	-1.79	-3	-0.97	-0.69	-3	-3	-3	-2.74
CLSPN	CLSPN (ENSG00000092853)	1.12	4.6	3.92	4.16	3.52	3.25	3.36	3.49	3.53
CDC7	CDC7 (ENSG00000097046)	1.11	4.9	4.74	4.93	4.58	4.42	4.36	4.48	4.65
SLC7A2	SLC7A2 (ENSG00000003989)	1.11	3.22	2.87	2.67	2.62	2.4	2.36	2.41	2.58
RBM15	RBM15 (ENSG00000162775)	1.08	2.57	2.56	2.65	2.44	2.39	2.48	2.32	2.28
TOMM22P5	TOMM22P5 (ENSG00000225155)	1.06	-3	-2.84	-2.25	-2.25	-3	-3	-3	-3
FBXL21	FBXL21 (ENSG00000164616)	1.06	-2.47	-2.74	-0.86	-1.09	-3	-3	-3	-2.74
PPARG	PPARG (ENSG00000132170)	1.05	3.65	3.67	3.85	3.7	3.49	3.37	3.6	3.59
CREG2	CREG2 (ENSG00000175874)	1.05	-3	-2.18	-2.84	-2.4	-3	-3	-3	-3
RPL5P3	RPL5P3 (ENSG00000242276)	1.03	-2.84	-2.12	-3	-2.12	-3	-3	-3	-3
PSMA5	PSMA5 (ENSG00000143106)	1.03	8.09	7.86	7.98	7.82	7.62	7.64	7.76	7.83
GCLM	GCLM (ENSG00000023909)	1.03	4.64	4.92	4.78	4.52	4.11	4.16	4.26	4.64
CDC45	CDC45 (ENSG00000093009)	1.03	5.3	4.72	4.76	4.76	4.15	4.29	4.57	4.55
HSPA8P5	HSPA8P5 (ENSG00000256356)	1.03	-2.47	-3	-2.84	-2.18	-3	-3	-3	-3
LRP4	LRP4 (ENSG00000134569)	1.03	2.06	0.96	1.24	1.06	0.58	0.88	0.66	0.6
TUBGCP4	TUBGCP4 (ENSG00000137822)	1.02	3.92	3.83	3.86	3.61	3.61	3.68	3.44	3.39
IPPK	IPPK (ENSG00000127080)	1.01	3.37	3.76	3.73	3.27	3.17	3.28	3.1	3.24
THOC5	THOC5 (ENSG00000100296)	0.99	5.1	5.13	5.15	4.97	5.03	4.92	4.66	4.75
MTFR2	MTFR2 (ENSG00000146410)	0.98	4.09	4.14	4.15	3.81	3.8	3.86	3.7	3.89
ST13P19	ST13P19 (ENSG00000228110)	0.98	-2.94	-2.56	-2.56	-3	-3	-3	-3	-3
CACYBP	CACYBP (ENSG00000116161)	0.98	7.86	7.59	7.42	7.21	7.24	7.24	7.08	7.15
EGLN1	EGLN1 (ENSG00000135766)	0.97	4.26	4.5	5.51	6.1	3.08	3.59	3.97	4.32
CD37	CD37 (ENSG00000104894)	0.97	-2.64	-2.84	1.54	0.48	-3	-3	-3	-3
ZDHHC14	ZDHHC14 (ENSG00000175048)	0.97	1.61	1.18	0.5	1.01	0.63	0.57	0.12	0.11
GNPDA1	GNPDA1 (ENSG00000113552)	0.95	6.72	6.64	6.54	6.56	6.45	6.51	6.53	6.52
DSCC1	DSCC1 (ENSG00000136982)	0.95	4.08	4.02	4.03	3.59	3.57	3.46	3.62	3.75
ESCO2	ESCO2 (ENSG00000171320)	0.94	3.49	3.45	3.05	2.79	2.82	2.91	2.76	2.7
TRIM24	TRIM24 (ENSG00000122779)	0.93	3.46	2.83	2.86	2.66	2.59	2.57	2.6	2.64
CCDC96	CCDC96 (ENSG00000173013)	0.93	-1.94	-1.84	-1.79	-1.84	-2.47	-2	-1.94	-2.12
CBX1P1	CBX1P1 (ENSG00000230823)	0.93	-0.27	-2.74	-1.18	-1.18	-2.4	-2.47	-2.4	-3
ANP32E	ANP32E (ENSG00000143401)	0.92	6.58	6.08	6.43	5.89	5.9	5.88	5.75	5.95
MLKL	MLKL (ENSG00000168404)	0.92	3.75	3.01	3.53	2.76	2.88	2.76	2.57	2.66
SERBP1P5	SERBP1P5 (ENSG00000249565)	0.92	1.01	0.06	0.15	-0.03	-0.45	-0.14	-0.2	-0.3
TFAM	TFAM (ENSG00000108064)	0.92	6.42	6.26	6.28	6.17	5.85	5.83	6.1	6.24
BICD1	BICD1 (ENSG00000151746)	0.92	4.07	4.32	3.88	3.76	3.82	3.72	3.48	3.52
MYCBP2	MYCBP2 (ENSG00000005810)	0.91	4.97	4.57	4.69	4.21	4.21	4.36	4.23	4.14
DERL1	DERL1 (ENSG00000136986)	0.91	5.77	5.87	6.1	5.8	5.69	5.75	5.64	5.73
TCP1	TCP1 (ENSG00000120438)	0.91	8.67	8.62	8.66	8.29	8.4	8.38	8.36	8.31
AS3MT	AS3MT (ENSG00000214435)	0.91	-1.51	-3	-2.84	-2.18	-3	-3	-3	-3
EXOSC2	EXOSC2 (ENSG00000130713)	0.9	6.34	6.04	5.94	6.03	5.76	5.81	5.88	5.95
PTENP1	PTENP1 (ENSG00000237984)	0.89	-1.6	-1.32	-2.25	-2.56	-2.4	-3	-2.74	-2.56
RPL23AP81	RPL23AP81 (ENSG00000242748)	0.89	-0.92	-1.47	-2.47	-0.17	-2.74	-2.74	-3	-1.84
PDCD6IPP2	PDCD6IPP2 (ENSG00000261377)	0.89	1.31	0.96	-0.97	-1.56	-1.84	-1.09	-1.84	-1.89
SAP130	SAP130 (ENSG00000136715)	0.89	4.28	4.05	4.69	4.04	3.86	3.95	3.96	4
SERPINA3	SERPINA3 (ENSG00000196136)	0.89	-1.51	-3	-2	-2.64	-2.94	-2.84	-3	-3
RPL24P2	RPL24P2 (ENSG00000235065)	0.88	1.35	1.59	1.58	2.15	1.34	1.03	0.89	1.37
LINC00685	LINC00685 (ENSG00000226179)	0.88	-1.6	-0.17	0.14	-1.22	-2.4	-2.47	-1.43	-1.47
TUBA8	TUBA8 (ENSG00000183785)	0.88	-3	-2.32	-1.51	-1.51	-3	-3	-2.64	-2.84
PRMT5-AS1	PRMT5-AS1 (ENSG00000237054)	0.88	-1.64	-0.81	-2.25	-1.06	-2.18	-2.84	-2.64	-1.89
ACTL6A	ACTL6A (ENSG00000136518)	0.88	6.87	6.86	6.91	6.92	6.51	6.43	6.82	6.9
RNF40	RNF40 (ENSG00000103549)	0.88	5.02	5.11	5.02	5.13	5	4.99	4.96	4.81
SMU1	SMU1 (ENSG00000122692)	0.88	6.22	6.21	6.08	6.08	6.05	6.08	5.96	6.05
PTDSS1	PTDSS1 (ENSG00000156471)	0.88	6.89	6.84	6.64	6.65	6.65	6.62	6.5	6.57
MAN2A1	MAN2A1 (ENSG00000112893)	0.88	4.87	4.81	5.1	4.7	4.67	4.68	4.58	4.74
ORC1	ORC1 (ENSG00000085840)	0.87	4.39	3.71	4.13	3.62	3.34	3.34	3.58	3.7
CUTC	CUTC (ENSG00000119929)	0.87	5.24	5.05	5.06	5.01	4.88	4.93	4.99	5
ATP2A2	ATP2A2 (ENSG00000174437)	0.87	6.73	6.63	6.83	6.69	6.46	6.44	6.62	6.67
LINC00316	LINC00316 (ENSG00000237664)	0.87	-3	-3	-2.4	-2.4	-3	-3	-3	-3
AK2P2	AK2P2 (ENSG00000242272)	0.87	-3	-3	-2	-2	-3	-3	-3	-3
CDCA4P1	CDCA4P1 (ENSG00000229029)	0.87	-2.84	-2.84	-3	-3	-3	-3	-3	-3
FGF9	FGF9 (ENSG00000102678)	0.87	-3	-3	-2.84	-2.84	-3	-3	-3	-3
AQP4	AQP4 (ENSG00000171885)	0.87	-3	-3	-1.51	-1.51	-3	-3	-3	-3
RPS2P41	RPS2P41 (ENSG00000244060)	0.87	-3	-3	-2.18	-2.18	-3	-3	-3	-3
ABHD1	ABHD1 (ENSG00000143994)	0.87	-3	-3	-1.69	-1.69	-3	-3	-3	-3
PHBP21	PHBP21 (ENSG00000260326)	0.87	-3	-3	-2.94	-2.94	-3	-3	-3	-3
FTH1P4	FTH1P4 (ENSG00000242992)	0.87	-3	-3	-2.94	-2.94	-3	-3	-3	-3
MTCO1P3	MTCO1P3 (ENSG00000228930)	0.87	-3	-3	2.79	2.74	-3	-3	-3	-3
RN7SL381P	RN7SL381P (ENSG00000263968)	0.87	-3	-3	-0.74	-0.76	-3	-3	-3	-3
RNVU1-6	RNVU1-6 (ENSG00000201558)	0.87	2.97	-3	3.06	-3	-3	-3	-3	-3
MT1XP1	MT1XP1 (ENSG00000233929)	0.87	1.95	-3	2.03	-3	-3	-3	-3	-3
FAM182A	FAM182A (ENSG00000125804)	0.86	-3	-3	-2.25	-2.32	-3	-3	-3	-3
RPL23AP34	RPL23AP34 (ENSG00000225991)	0.86	-1	-3	-3	-1.22	-3	-3	-3	-3
TPM3P8	TPM3P8 (ENSG00000183022)	0.86	-2.4	-3	-2.32	-3	-3	-3	-3	-3
CDRT15P1	CDRT15P1 (ENSG00000141028)	0.86	-1.94	-2.06	-3	-3	-3	-3	-3	-3
QTRTD1	QTRTD1 (ENSG00000151576)	0.86	4.98	5.2	5.01	4.76	4.83	4.82	4.66	4.73
COX6CP1	COX6CP1 (ENSG00000260318)	0.86	0.93	0.49	-3	-3	-3	-3	-3	-3
PGAM4	PGAM4 (ENSG00000226784)	0.86	-2.47	-3	-3	-2.4	-3	-3	-3	-3
RFESDP1	RFESDP1 (ENSG00000231650)	0.86	-3	-3	-2.4	-2.47	-3	-3	-3	-3
TEX14	TEX14 (ENSG00000121101)	0.86	-3	-3	-2	-1.84	-3	-3	-3	-3
SRSF7	SRSF7 (ENSG00000115875)	0.86	8.32	7.87	7.78	7.65	7.66	7.61	7.6	7.64
IL4	IL4 (ENSG00000113520)	0.86	-1.12	-1.4	-3	-3	-3	-3	-3	-3
HAVCR2	HAVCR2 (ENSG00000135077)	0.86	-3	-3	-2.25	-2.12	-3	-3	-3	-3
SRGAP2C	SRGAP2C (ENSG00000171943)	0.86	3.37	3.42	4.07	2.95	3.04	2.93	2.97	3.06
CNN2P9	CNN2P9 (ENSG00000213149)	0.86	-3	-2.47	-2.56	-3	-3	-3	-3	-3
GALNT8	GALNT8 (ENSG00000130035)	0.86	-1.25	-2.84	-2.18	-3	-3	-3	-3	-3
HHLA1	HHLA1 (ENSG00000132297)	0.86	-3	-3	-2.18	-2.32	-3	-3	-3	-3
HMGN2P3	HMGN2P3 (ENSG00000230330)	0.86	-3	-0.81	-3	-0.34	-3	-3	-3	-3
SGSM1	SGSM1 (ENSG00000167037)	0.86	-3	-3	-0.71	-1.12	-3	-3	-3	-3
RN7SL388P	RN7SL388P (ENSG00000239577)	0.86	-1.6	-3	-1.29	-3	-3	-3	-3	-3
C16orf59	C16orf59 (ENSG00000162062)	0.86	2.4	2.16	2.05	1.73	1.96	1.7	1.18	1.33
MT-ATP8	MT-ATP8 (ENSG00000228253)	0.86	14.6	14.54	14.88	14.76	14.38	14.42	14.64	14.25
FAM65B	FAM65B (ENSG00000111913)	0.85	-3	-3	-2.25	-2.06	-3	-3	-3	-3
NEIL3	NEIL3 (ENSG00000109674)	0.85	3.27	3.07	3.14	2.62	2.61	2.8	2.73	2.71
TAP2	TAP2 (ENSG00000204267)	0.85	4.97	5.05	5.3	4.65	4.4	4.48	4.67	4.83
BACH1-IT1	BACH1-IT1 (ENSG00000248476)	0.85	-2.18	-1.94	-3	-3	-3	-3	-3	-3
CACYBPP2	CACYBPP2 (ENSG00000177855)	0.85	0.9	0.58	0.23	0.3	-1.69	-0.12	0.12	-0.17
MAP2K4P1	MAP2K4P1 (ENSG00000269904)	0.85	-2.74	-3	-2.64	-3	-3	-3	-3	-3
TREML3P	TREML3P (ENSG00000184106)	0.85	-3	-3	-2.64	-2.74	-3	-3	-3	-3
RPS3AP54	RPS3AP54 (ENSG00000229057)	0.85	-3	-3	-2.64	-2.74	-3	-3	-3	-3
TRIM17	TRIM17 (ENSG00000162931)	0.85	-3	-3	-2.74	-2.64	-3	-3	-3	-3
ERLEC1P1	ERLEC1P1 (ENSG00000240755)	0.85	-2.74	-3	-2.64	-3	-3	-3	-3	-3
CYP26A1	CYP26A1 (ENSG00000095596)	0.85	-3	-3	-2.4	-2.56	-3	-3	-3	-3
PWP2	PWP2 (ENSG00000241945)	0.85	4.85	4.64	4.64	4.55	4.52	4.44	4.13	4.53
EIF4A1P4	EIF4A1P4 (ENSG00000257790)	0.85	-2.94	-3	-2.4	-2.74	-3	-3	-3	-3
WDHD1	WDHD1 (ENSG00000198554)	0.85	4.96	4.61	4.77	4.61	4.38	4.47	4.53	4.63
CELF1	CELF1 (ENSG00000149187)	0.84	5.55	5.21	5.22	4.92	4.93	5.05	4.88	4.93
MRPL27	MRPL27 (ENSG00000108826)	0.84	7.33	7.34	7.27	7.37	7.11	7.06	7.29	7.3
AMOTL1	AMOTL1 (ENSG00000166025)	0.84	4.31	4.25	4.07	4.17	4.02	4	4.05	4.15
DDX11L5	DDX11L5 (ENSG00000236875)	0.84	-3	-3	-2.47	-2.25	-3	-3	-3	-3
UGGT1	UGGT1 (ENSG00000136731)	0.84	4.71	4.67	4.78	4.66	4.45	4.47	4.56	4.73
CHCHD4	CHCHD4 (ENSG00000163528)	0.84	5.33	5.24	5.36	5.22	4.95	4.85	5.27	5.19
RHOT1P1	RHOT1P1 (ENSG00000266145)	0.83	-3	-1.74	-1.12	-3	-3	-3	-3	-3
MPRIPP1	MPRIPP1 (ENSG00000214820)	0.83	-2.47	-2.56	-1.69	-1.74	-3	-3	-3	-2.25
CCDC61	CCDC61 (ENSG00000104983)	0.83	2.7	2.04	2.06	1.89	1.5	2.1	0.93	1.37
SIGMAR1	SIGMAR1 (ENSG00000147955)	0.83	6.42	5.93	6.31	6.14	5.79	5.94	5.97	6.04
CEBPZ	CEBPZ (ENSG00000115816)	0.83	6.38	6.33	6.24	6.12	6.07	5.95	6.14	6.18
CASP8AP2	CASP8AP2 (ENSG00000118412)	0.82	3.59	3.45	3.49	3.21	3.27	3.19	3.19	3.34
NASP	NASP (ENSG00000132780)	0.82	8.49	7.78	7.46	7.5	7.39	7.37	7.43	7.37
RN7SL32P	RN7SL32P (ENSG00000263941)	0.82	-3	-3	-0.42	1.13	-3	-3	-3	-3
RPL31P11	RPL31P11 (ENSG00000213075)	0.82	-3	-2.18	-1.69	-3	-3	-3	-3	-3
PPAN-P2RY11	PPAN-P2RY11 (ENSG00000243207)	0.82	-2.84	-3	-2.74	-3	-3	-3	-3	-3
PTTG3P	PTTG3P (ENSG00000213005)	0.82	-2.74	-2.84	-3	-3	-3	-3	-3	-3
MCM4	MCM4 (ENSG00000104738)	0.82	6.86	6.29	6.63	6.41	6.08	5.99	6.34	6.34
RAD23B	RAD23B (ENSG00000119318)	0.82	7.39	7.42	7.66	7.5	7.26	7.24	7.4	7.39
PSMC3IP	PSMC3IP (ENSG00000131470)	0.82	5.17	4.95	5.38	4.55	4.62	4.56	4.5	4.79
OAS2	OAS2 (ENSG00000111335)	0.82	-3	-3	-1.43	-1.03	-3	-3	-2.94	-3
LINC01269	LINC01269 (ENSG00000258689)	0.82	-3	-3	-2.18	-1.64	-3	-3	-3	-3
GNRH2	GNRH2 (ENSG00000125787)	0.82	-3	-2.06	-0.42	-2.74	-3	-3	-3	-3
MAP3K3	MAP3K3 (ENSG00000198909)	0.81	4.06	4.04	4.06	4.11	3.83	3.75	3.98	4.1
WNT2	WNT2 (ENSG00000105989)	0.81	-3	-2.56	-2.74	-3	-3	-3	-3	-3
LGI4	LGI4 (ENSG00000153902)	0.81	-3	-3	-2.64	-2.4	-3	-3	-3	-3
MYH7B	MYH7B (ENSG00000078814)	0.81	-3	-3	-1.84	-2.32	-3	-3	-3	-3
HSPA8	HSPA8 (ENSG00000109971)	0.81	11.78	11.27	11.43	11.06	11.19	11.07	10.99	10.95
DNAJA3	DNAJA3 (ENSG00000103423)	0.81	5.63	5.5	5.23	5.51	5.31	5.3	5.28	5.34
LINC00867	LINC00867 (ENSG00000232139)	0.81	-3	-1.6	-1.06	-3	-3	-3	-3	-2.94
KLHL8	KLHL8 (ENSG00000145332)	0.81	3.03	3	3.3	2.92	2.77	2.51	2.83	2.98
MUC4	MUC4 (ENSG00000145113)	0.8	-3	-3	-1.09	-1.94	-3	-3	-3	-3
LOH12CR2	LOH12CR2 (ENSG00000205791)	0.8	-1.64	-1.56	-0.97	-0.76	-2.32	-2.18	-1.6	-1.51
YTHDF3-AS1	YTHDF3-AS1 (ENSG00000270673)	0.8	-2.18	-3	-2.64	-1.06	-2.84	-3	-3	-3
PSORS1C2	PSORS1C2 (ENSG00000204538)	0.79	-3	-3	-2	-2.47	-3	-3	-3	-3
PHF8	PHF8 (ENSG00000172943)	0.79	3.35	3.57	3.9	3.97	3.36	3.33	3.43	3.5
CASC5	CASC5 (ENSG00000137812)	0.79	3.75	3.64	3.22	3.13	3.04	3.07	3.2	3.2
CLASP2	CLASP2 (ENSG00000163539)	0.79	4.14	4.11	3.68	3.86	3.58	3.86	3.64	3.62
RPLP1P6	RPLP1P6 (ENSG00000213433)	0.79	0.86	0.64	-0.29	0.59	-0.69	0.31	-0.34	-1.64
RPL34P6	RPL34P6 (ENSG00000231333)	0.79	-3	-3	-1.4	0.15	-3	-3	-3	-3
ZNF672	ZNF672 (ENSG00000171161)	0.79	3.15	3.34	3.23	2.91	2.93	3.08	2.81	2.67
PHTF1	PHTF1 (ENSG00000116793)	0.79	4.14	4.17	4.53	3.67	3.83	3.86	3.51	3.7
UBXN2B	UBXN2B (ENSG00000215114)	0.79	3.93	4.11	4.3	3.73	3.69	3.76	3.75	3.87
RPL23AP20	RPL23AP20 (ENSG00000235990)	0.78	-2.56	-3	-2.12	-3	-3	-3	-3	-3
MRLN	MRLN (ENSG00000227877)	0.78	-2.56	-3	-0.43	-1.06	-3	-3	-2.56	-3
ELMO2	ELMO2 (ENSG00000062598)	0.78	4.44	4.5	4.58	4.43	4.27	4.29	4.41	4.47
C1orf174	C1orf174 (ENSG00000198912)	0.78	4.72	4.51	4.86	4.57	4.43	4.46	4.47	4.59
MYH16	MYH16 (ENSG00000002079)	0.78	-2.06	-2.12	0.25	-0.4	-2.25	-3	-3	-1.74
PSMA4	PSMA4 (ENSG00000041357)	0.78	8.08	8.13	7.98	7.75	7.86	7.78	7.83	7.65
SLC35G1	SLC35G1 (ENSG00000176273)	0.78	3.91	3.65	3.59	3.5	3.48	3.55	3.41	3.49
LRWD1	LRWD1 (ENSG00000161036)	0.78	3.46	2.96	3.35	2.43	2.69	2.64	2.68	2.56
HIST2H2BF	HIST2H2BF (ENSG00000203814)	0.78	-0.4	-0.36	-0.43	-2.12	-1.09	-1.84	-3	-3
TF	TF (ENSG00000091513)	0.78	-1	-1.69	-0.51	-2.25	-2.32	-2.74	-1.74	-2.32
SLC25A51	SLC25A51 (ENSG00000122696)	0.78	3.36	3.23	3.13	3.23	3.12	3.18	3.06	2.86
SDS	SDS (ENSG00000135094)	0.78	-3	-3	-2.18	-2.32	-3	-3	-3	-2.94
PTMAP5	PTMAP5 (ENSG00000214182)	0.78	2.73	2.27	2.15	2.15	2.04	2.08	1.58	2.03
EXOSC3	EXOSC3 (ENSG00000107371)	0.77	6.03	5.59	5.5	5.55	5.43	5.55	5.17	5.16
DNAJC8P1	DNAJC8P1 (ENSG00000259022)	0.77	-3	-0.25	-1.69	-3	-3	-3	-3	-3
NPM1P24	NPM1P24 (ENSG00000215086)	0.77	0.37	0.11	-0.27	-0.42	-0.6	-0.25	-0.64	-1.6
LHFPL2	LHFPL2 (ENSG00000145685)	0.77	3.51	3.37	3.21	3.49	3.09	3.19	3.34	3.23
ULBP3	ULBP3 (ENSG00000131019)	0.77	2.6	1.88	2.27	2.53	1.77	1.53	2.09	2.05
ASPDH	ASPDH (ENSG00000204653)	0.77	-3	-3	-2.06	-0.97	-3	-3	-3	-3
GABRB3	GABRB3 (ENSG00000166206)	0.77	-3	-3	-0.84	-2	-3	-3	-3	-3
NFE2	NFE2 (ENSG00000123405)	0.77	-3	-3	-1.69	-2.4	-3	-3	-3	-3
ST3GAL1P1	ST3GAL1P1 (ENSG00000250656)	0.77	-3	-2.18	-3	-1.22	-3	-3	-3	-3
DHX9	DHX9 (ENSG00000135829)	0.77	7.8	7.63	7.21	7.38	7.28	7.29	7.27	7.32
TMSB4XP4	TMSB4XP4 (ENSG00000223551)	0.76	-2.18	-1.06	-3	-1.69	-2.47	-3	-3	-2.74
QKI	QKI (ENSG00000112531)	0.76	5.48	5.53	5.48	5.59	5.27	5.38	5.52	5.43
EPB41	EPB41 (ENSG00000159023)	0.76	4.2	3.84	4.1	3.26	3.46	3.55	3.29	3.48
BOLA2P2	BOLA2P2 (ENSG00000271161)	0.76	-3	-0.89	-3	-2.06	-3	-3	-3	-3
GDF11	GDF11 (ENSG00000135414)	0.76	3	2.13	2.59	2.35	2.09	2.11	2.24	2.25
FHP1	FHP1 (ENSG00000234213)	0.76	-2.56	-3	-3	-2	-3	-3	-3	-3
RPL32P34	RPL32P34 (ENSG00000239524)	0.76	-3	-2.56	-3	-2	-3	-3	-3	-3
DNMT1	DNMT1 (ENSG00000130816)	0.76	6.55	6.25	6.93	6.46	5.86	5.97	6.24	6.45
ATF4P3	ATF4P3 (ENSG00000228218)	0.76	-2	-0.84	-1.12	-1.29	-3	-3	-1.18	-2.18
STAU2-AS1	STAU2-AS1 (ENSG00000253302)	0.76	-3	-3	-2.25	-1.29	-3	-3	-3	-3
CNTF	CNTF (ENSG00000242689)	0.76	0.23	0.21	0.96	-0.29	0.08	-0.58	-0.56	-0.32
RAMP2-AS1	RAMP2-AS1 (ENSG00000197291)	0.76	-3	-2.4	-3	-2.74	-3	-3	-3	-3
SRPR	SRPR (ENSG00000182934)	0.76	5.75	5.68	5.61	5.47	5.54	5.56	5.34	5.36
CYP4Z1	CYP4Z1 (ENSG00000186160)	0.76	-1.79	-2.47	-3	-3	-3	-3	-3	-3
SAXO2	SAXO2 (ENSG00000188659)	0.75	0.03	-1.12	-1.64	-1.47	-2.47	-1.89	-1.64	-1.64
NR4A2	NR4A2 (ENSG00000153234)	0.75	-1.69	-1.25	0.41	-1.56	-1.84	-1.74	-2.47	-1.94
LINC00379	LINC00379 (ENSG00000229557)	0.75	-3	-3	-1.22	-2.25	-3	-3	-3	-3
PDHB	PDHB (ENSG00000168291)	0.75	6.07	5.76	5.65	5.61	5.64	5.6	5.53	5.55
G3BP1	G3BP1 (ENSG00000145907)	0.75	7.33	6.9	6.64	6.7	6.66	6.62	6.6	6.67
METTL1	METTL1 (ENSG00000037897)	0.75	4.48	4.56	4.39	4.44	4.41	4.42	4.2	3.96
TXNL4B	TXNL4B (ENSG00000140830)	0.75	3.94	4.32	4.44	3.55	3.74	3.79	3.48	3.62
FTLP12	FTLP12 (ENSG00000265095)	0.75	-3	-3	-2.32	-1.36	-3	-3	-3	-3
EYS	EYS (ENSG00000188107)	0.74	-2.32	-1.69	-2.56	-3	-3	-3	-2.84	-2.74
MELK	MELK (ENSG00000165304)	0.74	5.85	5.39	5.42	5.47	5.02	5.01	5.4	5.41
ERI1	ERI1 (ENSG00000104626)	0.74	4.07	3.89	4.08	3.68	3.7	3.79	3.77	3.78
CEMP1	CEMP1 (ENSG00000205923)	0.74	-2.32	-1.29	-3	-3	-3	-3	-3	-3
XPO5	XPO5 (ENSG00000124571)	0.74	5.3	5.44	5.33	5.09	5.17	5.19	4.97	5.11
RPL5P29	RPL5P29 (ENSG00000242208)	0.73	-2.32	-2.74	-3	-3	-3	-3	-3	-3
GIMAP2	GIMAP2 (ENSG00000106560)	0.73	-2.32	-3	-2.74	-3	-3	-3	-3	-3
HNRNPA2B1	HNRNPA2B1 (ENSG00000122566)	0.73	11.05	10.41	10.37	10.48	10.15	10.15	10.37	10.35
PTBP1	PTBP1 (ENSG00000011304)	0.73	8.75	8.25	8.51	8.52	7.99	8	8.37	8.4
GADD45G	GADD45G (ENSG00000130222)	0.73	-3	-3	-1.29	-2.18	-3	-3	-3	-2.94
DAND5	DAND5 (ENSG00000179284)	0.73	-3	-3	-0.94	-2.06	-3	-3	-2.94	-3
SLK	SLK (ENSG00000065613)	0.73	4.4	4.42	4.32	4.18	4.12	4.13	4.18	4.31
FBXO45	FBXO45 (ENSG00000174013)	0.73	4.1	4.11	4.38	3.76	3.87	3.86	3.8	3.93
PCNX	PCNX (ENSG00000100731)	0.73	3.29	3.38	3.51	3.43	3.22	3.03	3.06	3.46
FZD9	FZD9 (ENSG00000188763)	0.73	-3	-3	-2.84	-2.56	-3	-3	-3	-3
CCNY	CCNY (ENSG00000108100)	0.72	5.15	4.91	4.92	4.85	4.86	4.85	4.86	4.84
PSME4	PSME4 (ENSG00000068878)	0.72	5.16	5.05	5.29	4.93	4.81	4.82	5.03	4.99
CELA3A	CELA3A (ENSG00000142789)	0.72	-3	-3	-1.79	-2.56	-3	-3	-3	-3
LUZP6	LUZP6 (ENSG00000267697)	0.72	4.8	-0.15	-3	-3	-3	-3	-3	-3
SNRNP25	SNRNP25 (ENSG00000161981)	0.72	5.37	5.11	5.55	5.3	4.95	5.08	5.16	5.25
ARHGEF7	ARHGEF7 (ENSG00000102606)	0.72	3.9	3.66	4.07	3.83	3.51	3.72	3.71	3.74
TBC1D9	TBC1D9 (ENSG00000109436)	0.72	2.9	2.58	2.45	2.41	2.38	2.38	2.42	2.43
RAB35	RAB35 (ENSG00000111737)	0.72	4.81	4.75	4.74	4.56	4.61	4.69	4.47	4.47
ZNF367	ZNF367 (ENSG00000165244)	0.72	3.54	3.17	3.2	2.94	2.85	2.71	2.81	3.18
SLC19A2	SLC19A2 (ENSG00000117479)	0.72	3.61	3.61	3.96	3.08	3.3	3.34	2.96	3.13
MPP6	MPP6 (ENSG00000105926)	0.72	4.64	4.38	4.22	3.92	3.99	4.17	3.89	3.82
TEX40	TEX40 (ENSG00000219435)	0.72	-3	-2.47	-1.51	-3	-3	-3	-3	-3
GAPVD1	GAPVD1 (ENSG00000165219)	0.72	4.1	4.28	4.11	3.93	3.96	4.05	3.86	3.88
MSH6	MSH6 (ENSG00000116062)	0.72	6.23	5.72	6.02	5.8	5.55	5.61	5.8	5.79
NPAT	NPAT (ENSG00000149308)	0.72	2.85	2.9	3.26	2.52	2.68	2.65	2.41	2.56
LONRF3	LONRF3 (ENSG00000175556)	0.72	-3	-3	-1.51	-2.32	-3	-3	-3	-2.94
PGAM5	PGAM5 (ENSG00000247077)	0.72	5.26	5.19	5.17	5.18	4.75	4.77	5.2	5.22
IGF1	IGF1 (ENSG00000017427)	0.72	-3	-3	-2.74	-2.25	-3	-3	-3	-3
LY6G6C	LY6G6C (ENSG00000204421)	0.72	-3	-3	-2.74	-2.25	-3	-3	-3	-3
MRPL24	MRPL24 (ENSG00000143314)	0.72	7.53	7.22	7.05	7.15	6.87	6.91	7.1	7.1
FOXN2	FOXN2 (ENSG00000170802)	0.72	3.8	3.58	3.7	3.22	3.42	3.25	3.17	3.38
TMEM163	TMEM163 (ENSG00000152128)	0.71	-3	-3	-2.94	-2.84	-3	-3	-3	-3
CTBP2P8	CTBP2P8 (ENSG00000234383)	0.71	-2.84	-3	-3	-2.94	-3	-3	-3	-3
PALM2	PALM2 (ENSG00000243444)	0.71	-1.6	-2.74	-1.6	-1.29	-2.64	-1.89	-3	-3
POLA1	POLA1 (ENSG00000101868)	0.71	3.71	3.14	3.25	3.21	2.73	2.67	3.08	3.28
CATSPERB	CATSPERB (ENSG00000133962)	0.71	-3	-3	-0.81	-2.25	-3	-3	-3	-3
STIL	STIL (ENSG00000123473)	0.71	3.99	3.98	4.23	3.75	3.58	3.64	3.8	3.93
SNRK-AS1	SNRK-AS1 (ENSG00000234617)	0.71	-2.06	-2.56	-2.64	-3	-3	-2.74	-3	-3
RBM44	RBM44 (ENSG00000177483)	0.71	-1.43	-1.79	-1.09	-1.56	-1.94	-1.69	-2.4	-1.64
STOM	STOM (ENSG00000148175)	0.71	4.73	4.68	5.26	4.82	4.34	4.41	4.65	4.76
FREM1	FREM1 (ENSG00000164946)	0.71	-3	-3	-1.94	-2.64	-3	-3	-3	-3
MARCO	MARCO (ENSG00000019169)	0.71	-3	-3	-2.64	-1.94	-3	-3	-3	-3
SERPINA5	SERPINA5 (ENSG00000188488)	0.71	-0.43	-1.84	-1.74	-1.56	-2.74	-1.74	-1.79	-2.74
B3GLCT	B3GLCT (ENSG00000187676)	0.71	2.15	1.79	1.96	1.74	1.54	1.41	1.71	1.88
SMIM19	SMIM19 (ENSG00000176209)	0.71	4.34	3.92	3.81	3.63	3.79	3.65	3.43	3.52
TPMT	TPMT (ENSG00000137364)	0.71	4.32	4.5	4.84	4.42	4.34	4.34	4.3	4.37
PRDX3	PRDX3 (ENSG00000165672)	0.71	8.31	8.15	8.1	7.9	8.01	7.99	7.97	7.96
DDX26B	DDX26B (ENSG00000165359)	0.71	0.52	0.75	1.3	0.52	0.45	0.58	0.29	0
SKP1P1	SKP1P1 (ENSG00000231234)	0.7	-0.74	0.12	-0.29	-1.64	-1.84	-1.29	-2.64	-0.97
IMP4	IMP4 (ENSG00000136718)	0.7	5.69	5.67	5.83	5.55	5.6	5.62	5.37	5.5
GALNT10	GALNT10 (ENSG00000164574)	0.7	4.32	3.38	3.45	3.61	3.24	2.83	3.33	3.42
MIS18A-AS1	MIS18A-AS1 (ENSG00000227256)	0.7	-3	-3	-2.74	-2.18	-3	-3	-3	-3
CD247	CD247 (ENSG00000198821)	0.7	-2.18	-3	-2.74	-3	-3	-3	-3	-3
ATP5F1P5	ATP5F1P5 (ENSG00000254944)	0.7	-3	-3	-2.18	-2.74	-3	-3	-3	-3
FAM76A	FAM76A (ENSG00000009780)	0.7	1.7	1.56	2.59	1.68	1.22	0.94	1.47	1.67
ZNF157	ZNF157 (ENSG00000147117)	0.7	-3	-2.47	-1.36	-3	-3	-3	-3	-3
USP2-AS1	USP2-AS1 (ENSG00000245248)	0.7	1.15	-0.09	-0.97	-0.43	-0.69	-0.6	-2.06	-1.43
MCRS1	MCRS1 (ENSG00000187778)	0.7	5.7	5.68	5.65	5.62	5.62	5.51	5.55	5.67
TCOF1	TCOF1 (ENSG00000070814)	0.7	5.42	5.33	5.33	5.38	5.28	5.34	5.29	5.34
PSMG1	PSMG1 (ENSG00000183527)	0.7	6.73	6.66	6.69	6.7	6.3	6.35	6.7	6.73
E2F1	E2F1 (ENSG00000101412)	0.7	4.45	3.86	4.11	3.95	3.63	3.75	3.87	3.98
KRT78	KRT78 (ENSG00000170423)	0.7	-3	-3	-2.32	-0.84	-3	-3	-3	-3
PGAM4P1	PGAM4P1 (ENSG00000215197)	0.7	-3	-2.4	-1.06	-3	-3	-3	-3	-3
MIR497HG	MIR497HG (ENSG00000267532)	0.69	-3	-3	-2.47	-2.84	-3	-3	-3	-3
DUTP2	DUTP2 (ENSG00000254388)	0.69	-2.84	-3	-3	-2.47	-3	-3	-3	-3
TP53TG5	TP53TG5 (ENSG00000124251)	0.69	-2.47	-3	-2.84	-3	-3	-3	-3	-3
PDCL3	PDCL3 (ENSG00000115539)	0.69	5.86	5.95	6.3	5.62	5.72	5.69	5.7	5.75
CDCA3	CDCA3 (ENSG00000111665)	0.69	5.86	5.12	5.12	5.21	4.73	4.8	5.11	5.12
GPATCH8	GPATCH8 (ENSG00000186566)	0.69	4.15	4.33	4.46	4.2	4.16	4.14	4.06	4.22
HOXB4	HOXB4 (ENSG00000182742)	0.69	2.02	1.71	1.73	1.58	1.71	1.59	1.1	1.4
CIITA	CIITA (ENSG00000179583)	0.69	-0.04	-1.74	-1.94	-2.74	-2.94	-2	-3	-3
PNN	PNN (ENSG00000100941)	0.69	6.15	6.23	6.24	6.32	6.09	6.04	6.16	6.23
SYT12	SYT12 (ENSG00000173227)	0.69	-3	-3	-2.12	-2.74	-3	-3	-3	-3
LINC01474	LINC01474 (ENSG00000236849)	0.69	-3	-2.74	-2.12	-3	-3	-3	-3	-3
RPL23AP37	RPL23AP37 (ENSG00000236148)	0.69	-3	-3	-1.51	-2.56	-3	-3	-3	-3
ALMS1	ALMS1 (ENSG00000116127)	0.69	3.35	3.32	3.8	2.9	3.04	3.02	2.89	3.13
COX17	COX17 (ENSG00000138495)	0.69	5.95	6.07	6.32	6.34	5.86	5.77	6.08	6.05
UTP3	UTP3 (ENSG00000132467)	0.68	5.76	5.74	5.69	5.86	5.59	5.55	5.75	5.7
C16orf93	C16orf93 (ENSG00000196118)	0.68	1.31	1.02	0.9	1.45	1.16	0.29	0.34	0.99
SLX4	SLX4 (ENSG00000188827)	0.68	1.33	1.01	1.53	1.49	0.73	0.63	1	1.4
KIAA0226	KIAA0226 (ENSG00000145016)	0.68	2.52	3.01	3.31	2.96	2.67	2.79	2.55	2.6
PELI3	PELI3 (ENSG00000174516)	0.68	1.97	1.61	2.05	1.72	1.86	1.41	1.44	1.52
IL20RB	IL20RB (ENSG00000174564)	0.68	-1.12	0.28	-0.38	-0.81	-1.25	-1.12	-0.76	-1.12
SHPRH	SHPRH (ENSG00000146414)	0.68	2.26	2.41	2.28	2.32	2.08	2.27	2.11	2.32
EN2	EN2 (ENSG00000164778)	0.68	-3	-3	-0.69	-1.94	-3	-3	-2.84	-3
TDH	TDH (ENSG00000154316)	0.68	-3	-3	-1.84	-2.18	-3	-3	-2.84	-3
UBE2E2	UBE2E2 (ENSG00000182247)	0.68	4.91	4.83	4.89	4.63	4.74	4.73	4.65	4.48
LIN54	LIN54 (ENSG00000189308)	0.68	2.41	2.79	2.95	2.4	2.51	2.37	2.13	2.35
SIN3A	SIN3A (ENSG00000169375)	0.67	4.9	4.52	4.9	4.23	4.48	4.42	4.07	4.16
STIP1P3	STIP1P3 (ENSG00000225536)	0.67	-2.4	-2.84	-3	-3	-3	-3	-3	-3
M6PR	M6PR (ENSG00000003056)	0.67	6.98	6.85	6.91	6.6	6.73	6.72	6.54	6.68
TAF5L	TAF5L (ENSG00000135801)	0.67	4.15	4.23	3.92	4.07	3.94	3.87	3.97	4.04
PLA2G15	PLA2G15 (ENSG00000103066)	0.67	2.82	2.89	3.23	2.76	2.83	2.7	2.49	2.72
DOLPP1	DOLPP1 (ENSG00000167130)	0.67	3.92	4.42	4.6	4.07	4.04	4.03	3.91	4.03
ENOPH1	ENOPH1 (ENSG00000145293)	0.67	5.35	5.42	5.65	5.04	5.04	5.14	5.16	5.23
FIGNL1	FIGNL1 (ENSG00000132436)	0.67	5.44	5	4.6	4.58	4.59	4.66	4.51	4.6
PHLPP1	PHLPP1 (ENSG00000081913)	0.67	1.91	1.76	1.95	1.71	1.46	1.62	1.57	1.89
C2orf80	C2orf80 (ENSG00000188674)	0.67	-3	-3	-2.4	-0.67	-3	-3	-3	-3
UBE3D	UBE3D (ENSG00000118420)	0.66	2.35	2.49	2.51	2.39	2.28	2.41	2.36	2.34
GLMN	GLMN (ENSG00000174842)	0.66	4.42	4.32	4.17	3.92	3.96	3.81	4.01	4.13
EIF2S2P3	EIF2S2P3 (ENSG00000236493)	0.66	-3	-2.12	-2.64	-3	-2.94	-3	-3	-3
FAR1	FAR1 (ENSG00000197601)	0.66	5.46	5.27	5.26	5.19	5.09	5.01	5.09	5.33
FGFBP3	FGFBP3 (ENSG00000174721)	0.66	-1.12	-2.74	-2.64	-2.64	-3	-2.84	-2.74	-2.94
ASB6	ASB6 (ENSG00000148331)	0.66	3.51	3.44	3.7	3.56	3.41	3.44	3.33	3.53
RTN4	RTN4 (ENSG00000115310)	0.66	8.14	7.9	8.04	7.86	7.68	7.68	7.9	7.95
RBMXL1	RBMXL1 (ENSG00000213516)	0.66	4.03	3.76	4.17	4.03	3.31	3.38	3.9	4
FOXC1	FOXC1 (ENSG00000054598)	0.66	1.75	1.66	1.38	1.57	1.3	1.43	1.13	1.58
ZFAND2B	ZFAND2B (ENSG00000158552)	0.66	3.5	3.41	3.97	3.69	3.42	3.35	3.45	3.52
RAB27A	RAB27A (ENSG00000069974)	0.66	3.29	3.1	3.13	2.51	2.72	2.72	2.75	2.82
SPATA13	SPATA13 (ENSG00000182957)	0.66	2.87	2.75	3.21	2.55	2.78	2.64	2.33	2.28
PPIAP19	PPIAP19 (ENSG00000228169)	0.66	-3	-2.18	-1.6	-3	-2.84	-3	-3	-2.94
CNTNAP3B	CNTNAP3B (ENSG00000154529)	0.66	0.59	-0.69	0.01	-0.07	-2	-0.64	-0.38	-0.49
JAZF1	JAZF1 (ENSG00000153814)	0.66	1.96	1.1	1.17	0.74	0.93	0.64	0.74	0.93
BRD7	BRD7 (ENSG00000166164)	0.66	5.79	5.47	5.5	5.47	5.38	5.33	5.32	5.53
CSPG4P11	CSPG4P11 (ENSG00000259726)	0.66	-3	-3	-2.84	-2.32	-3	-3	-3	-3
LARP4	LARP4 (ENSG00000161813)	0.65	5.12	5.38	5.35	4.88	5.02	5.01	4.85	5.01
DACT3-AS1	DACT3-AS1 (ENSG00000245598)	0.65	-3	-3	-2.64	-1.51	-3	-3	-3	-3
PLSCR2	PLSCR2 (ENSG00000163746)	0.65	-3	-3	-1.56	-2.25	-3	-3	-3	-2.84
PAFAH1B2	PAFAH1B2 (ENSG00000168092)	0.65	4.94	4.74	4.63	4.55	4.59	4.57	4.6	4.62
TFEC	TFEC (ENSG00000105967)	0.65	-3	-3	-1.89	-2.74	-3	-3	-3	-3
NCAPH2	NCAPH2 (ENSG00000025770)	0.65	4.48	4.08	4.42	4.27	4.02	4.04	4.11	4.3
SPC25	SPC25 (ENSG00000152253)	0.65	5.46	4.6	4.43	4.32	4.26	4.31	4.4	4.35
PCGF7P	PCGF7P (ENSG00000268140)	0.65	-2.18	-1.06	-2.12	-3	-3	-3	-2.32	-3
PRDX3P1	PRDX3P1 (ENSG00000229598)	0.65	-2.74	-3	-2.74	-3	-3	-2.94	-3	-3
HNRNPA3P6	HNRNPA3P6 (ENSG00000213300)	0.65	3.71	3.54	3.48	3.97	2.14	1.38	4.47	2.73
C10orf131	C10orf131 (ENSG00000173088)	0.65	-2	-0.86	-0.49	-1.32	-2.12	-1.15	-2.4	-2.12
ANKRD32	ANKRD32 (ENSG00000133302)	0.65	2.92	2.81	2.89	2.46	2.51	2.63	2.11	2.63
FUT2	FUT2 (ENSG00000176920)	0.65	-1.12	-3	-2.18	-3	-3	-3	-2.84	-3
ACLY	ACLY (ENSG00000131473)	0.65	7.14	6.68	7.33	6.69	6.66	6.63	6.65	6.83
RHOG	RHOG (ENSG00000177105)	0.65	4.45	4.19	4.31	4.26	4.2	4.26	4.02	4.16
RAB14	RAB14 (ENSG00000119396)	0.65	5.15	5.07	5.21	5.07	4.78	4.83	5.09	5.15
C9orf142	C9orf142 (ENSG00000148362)	0.65	4.36	3.84	4.28	4.09	3.84	4	3.84	4.03
AGO2	AGO2 (ENSG00000123908)	0.65	2.88	2.91	3.73	3.23	2.48	2.63	2.85	3.08
NAP1L4	NAP1L4 (ENSG00000205531)	0.65	6.84	6.6	6.86	6.64	6.42	6.49	6.69	6.65
ACSL1	ACSL1 (ENSG00000151726)	0.65	4.08	3.55	3.73	3.27	3.22	3.41	3.24	3.52
LYPD6	LYPD6 (ENSG00000187123)	0.65	2.63	1.26	1.66	0.96	0.85	1.23	1	1.12
E2F5	E2F5 (ENSG00000133740)	0.65	4.74	4.44	5	4.42	4.33	4.3	4.48	4.51
TNFRSF8	TNFRSF8 (ENSG00000120949)	0.65	-3	-3	-1.43	-2.64	-3	-3	-3	-3
CDT1	CDT1 (ENSG00000167513)	0.65	3.14	2.31	3.2	2.48	2.36	2.48	2.03	2.52
TEX30	TEX30 (ENSG00000151287)	0.65	5.47	5.04	4.78	4.73	4.57	4.72	4.78	4.8
SLC35F2	SLC35F2 (ENSG00000110660)	0.64	4.8	4.73	4.82	4.82	4.43	4.36	4.81	4.83
STIM2	STIM2 (ENSG00000109689)	0.64	2.13	2.83	3.09	2.46	2.47	2.2	2	2.25
ATP4A	ATP4A (ENSG00000105675)	0.64	-3	-3	-2.4	-2.74	-3	-3	-2.94	-3
ENY2	ENY2 (ENSG00000120533)	0.64	7.98	7.98	7.72	7.81	7.72	7.61	7.77	7.82
NAAA	NAAA (ENSG00000138744)	0.64	2.63	1.12	0.75	0.04	0.4	0.44	-0.3	0.3
RN7SL181P	RN7SL181P (ENSG00000243738)	0.64	-0.6	0.1	1.19	-3	-3	-0.76	-3	-3
ATP1B3	ATP1B3 (ENSG00000069849)	0.64	7.06	7.15	7.25	7.12	6.83	6.91	7.12	7.13
ELP6	ELP6 (ENSG00000163832)	0.64	5.85	5.75	5.57	5.18	5.44	5.39	5.11	5.26
NAA50	NAA50 (ENSG00000121579)	0.64	7.09	7.15	7.34	7.09	6.79	6.8	7.06	7.2
TOPORS	TOPORS (ENSG00000197579)	0.64	4.55	4.53	4.48	4.05	4.26	4.21	4.09	4.25
ELOVL2	ELOVL2 (ENSG00000197977)	0.64	2.43	1.3	1.82	1.29	0.96	0.93	1.2	1.59
ARHGAP28	ARHGAP28 (ENSG00000088756)	0.64	-3	-3	-1.36	-2.64	-3	-3	-3	-3
SLC14A1	SLC14A1 (ENSG00000141469)	0.64	-2.74	-3	-2.94	-3	-3	-3	-3	-3
GMPS	GMPS (ENSG00000163655)	0.64	7.01	6.65	6.8	6.57	6.55	6.53	6.58	6.69
RANBP3	RANBP3 (ENSG00000031823)	0.64	5.28	5.12	4.73	4.9	4.75	5.03	4.38	4.5
ZNF215	ZNF215 (ENSG00000149054)	0.64	2.64	2.49	2.32	2.56	2.37	2.17	2.24	2.5
RAP1A	RAP1A (ENSG00000116473)	0.64	6.17	5.83	6.04	5.83	5.69	5.55	5.85	5.93
CLTA	CLTA (ENSG00000122705)	0.64	7.18	6.91	6.96	7.12	6.76	6.85	7.02	6.93
ZFPM1	ZFPM1 (ENSG00000179588)	0.64	0.01	-1.89	0.88	-0.27	-2.64	-1.79	-0.56	-1.43
POMP	POMP (ENSG00000132963)	0.64	7.33	7.22	7.07	7.11	7.02	6.99	7.16	7.08
AZIN1	AZIN1 (ENSG00000155096)	0.64	7.19	7.34	7.52	6.98	7.13	7.11	7	7.08
MYO10	MYO10 (ENSG00000145555)	0.64	4.39	3.85	3.73	3.83	3.66	3.71	3.71	3.81
QSER1	QSER1 (ENSG00000060749)	0.64	4.12	4.1	4.17	4.07	3.85	3.86	4.02	4.2
H3F3C	H3F3C (ENSG00000188375)	0.64	-1.6	-1.36	-1.09	-1.89	-2.32	-3	-1.89	-1.36
ZNF714	ZNF714 (ENSG00000160352)	0.64	2.11	2.26	2.44	2.35	2.24	2.15	2.09	2.17
PHF5A	PHF5A (ENSG00000100410)	0.64	6.48	6.26	6.33	6.51	6.09	6.06	6.35	6.36
MYL7	MYL7 (ENSG00000106631)	0.64	-1.89	-3	-1.36	-2	-3	-3	-2.64	-2.25
TLL1	TLL1 (ENSG00000038295)	0.64	-3	-3	-1.74	-2.74	-3	-3	-3	-3
NDUFA6	NDUFA6 (ENSG00000184983)	0.63	6.45	6.04	6.05	6.02	5.92	6.02	6.02	5.96
MKI67	MKI67 (ENSG00000148773)	0.63	5.74	4.91	5.28	5.11	4.46	4.5	5.13	5.12
NCL	NCL (ENSG00000115053)	0.63	9.69	9.38	9.32	9.2	9.29	9.25	9.23	9.17
POLR3K	POLR3K (ENSG00000161980)	0.63	5.01	4.76	4.79	4.3	4.57	4.57	4.22	4.26
KLHL23	KLHL23 (ENSG00000213160)	0.63	4.1	3.91	3.8	3.57	3.69	3.81	3.36	3.46
GNL2	GNL2 (ENSG00000134697)	0.63	6.73	6.75	6.34	6.29	6.42	6.37	6.23	6.21
GFI1	GFI1 (ENSG00000162676)	0.63	-1.64	-1.84	-2.18	-2.74	-2.84	-2	-2.94	-3
LINC01424	LINC01424 (ENSG00000236519)	0.63	-2.4	-2.25	-1.6	-1.6	-1.79	-3	-3	-2.56
RAPGEF4	RAPGEF4 (ENSG00000091428)	0.63	-3	-2.47	-1.36	-1.84	-3	-3	-2.56	-2.56
CCDC144NL-AS1	CCDC144NL-AS1 (ENSG00000233098)	0.63	-3	-2.74	-2.25	-3	-3	-3	-2.94	-3
C19orf68	C19orf68 (ENSG00000185453)	0.62	1.25	1.32	2.01	1.79	0.85	1.51	1.27	1.15
ELAVL1	ELAVL1 (ENSG00000066044)	0.62	6.3	5.65	6.26	5.7	5.53	5.59	5.65	5.88
CCDC12	CCDC12 (ENSG00000160799)	0.62	5.71	5.29	5.76	5.38	5.31	5.37	5.3	5.43
BEND7	BEND7 (ENSG00000165626)	0.62	3.19	2.3	1.56	1.67	1.74	1.77	1.47	1.38
RMI1	RMI1 (ENSG00000178966)	0.62	4	3.89	3.7	3.46	3.51	3.58	3.53	3.67
CSMD3	CSMD3 (ENSG00000164796)	0.62	-2.12	-2.84	-3	-3	-3	-3	-3	-3
SPECC1L	SPECC1L (ENSG00000100014)	0.62	3.63	3.87	4.03	3.81	3.52	3.53	3.76	3.78
HNRNPAB	HNRNPAB (ENSG00000197451)	0.62	8.07	7.4	7.62	7.57	7.16	7.1	7.49	7.6
HPCA	HPCA (ENSG00000121905)	0.62	-2.12	-1.79	-0.81	-2.18	-3	-1.47	-3	-2.84
GTF3C5	GTF3C5 (ENSG00000148308)	0.62	5.54	5.55	6.04	5.33	5.32	5.51	5.22	5.36
CNDP1	CNDP1 (ENSG00000150656)	0.62	-3	-3	-1.64	-2.4	-3	-3	-3	-2.84
POLR3E	POLR3E (ENSG00000058600)	0.62	4.64	4.35	4.81	4.66	4.18	4.15	4.31	4.7
ARHGAP20	ARHGAP20 (ENSG00000137727)	0.62	-2.18	-2.74	-3	-3	-3	-2.94	-3	-3
SERPIND1	SERPIND1 (ENSG00000099937)	0.62	0.44	-1.84	-3	-3	-2.74	-3	-3	-3
RPL21P32	RPL21P32 (ENSG00000224019)	0.62	-3	-3	-0.54	-2.56	-3	-3	-3	-3
POLE2	POLE2 (ENSG00000100479)	0.62	4.5	3.76	3.48	3.45	3.2	3.65	3.34	3.32
BMS1P20	BMS1P20 (ENSG00000236850)	0.62	2.05	2.14	2.06	1.85	2.09	1.93	1.41	1.57
VDR	VDR (ENSG00000111424)	0.62	0.42	-0.09	0.49	0.73	-0.54	-0.36	0.24	0.31
ST7-AS1	ST7-AS1 (ENSG00000227199)	0.62	-2.74	-2.84	-2.47	-3	-2.84	-3	-2.94	-3
C4B	C4B (ENSG00000224389)	0.61	0.12	0.55	0.76	0.7	0.49	0.56	-0.79	-0.51
PSMB5	PSMB5 (ENSG00000100804)	0.61	7.91	7.89	8.22	7.98	7.9	7.85	7.93	7.83
PPM1L	PPM1L (ENSG00000163590)	0.61	-0.23	0.07	0.26	-0.17	-0.18	-0.1	-0.29	-0.25
EXOSC6	EXOSC6 (ENSG00000223496)	0.61	3.29	3.49	3.36	3.1	3.3	3.2	2.92	2.96
DDX3X	DDX3X (ENSG00000215301)	0.61	7.57	7.69	7.56	7.73	7.46	7.4	7.52	7.68
LINC00173	LINC00173 (ENSG00000196668)	0.61	-1	-2	0.25	-2.64	-1.43	-3	-3	-2.94
KLF4	KLF4 (ENSG00000136826)	0.61	0.59	0.51	1.71	0.53	-0.09	-0.34	0.69	0.48
ZNF616	ZNF616 (ENSG00000204611)	0.61	2	2.01	1.77	1.91	1.88	1.86	1.7	1.75
IAPP	IAPP (ENSG00000121351)	0.61	-3	-3	-1.94	-2.06	-3	-3	-2.74	-3
PRRC2C	PRRC2C (ENSG00000117523)	0.61	6.42	6.55	6.34	6.24	6.35	6.3	6.15	6.2
YBX1P10	YBX1P10 (ENSG00000213866)	0.61	1.46	0.97	-0.22	0.83	0.14	0.4	0.33	0.06
TIAM1	TIAM1 (ENSG00000156299)	0.61	1.57	0.59	0.9	0.03	0.33	0.54	-0.14	0.07
ARHGEF12	ARHGEF12 (ENSG00000196914)	0.61	4.07	4.11	3.93	3.58	3.79	3.79	3.58	3.69
CHRNA5	CHRNA5 (ENSG00000169684)	0.61	2.93	2.43	3.85	3.25	2.03	1.79	2.79	2.99
C8orf33	C8orf33 (ENSG00000182307)	0.61	6.12	6.14	6.27	5.75	5.9	6.01	5.64	5.78
RP9P	RP9P (ENSG00000205763)	0.61	2.41	2.55	3.29	2.62	2.2	2.15	2.59	2.45
PSMD13	PSMD13 (ENSG00000185627)	0.61	7.94	7.82	7.75	7.9	7.51	7.54	7.88	7.82
HNRNPH3	HNRNPH3 (ENSG00000096746)	0.61	8.25	8.36	7.92	8.16	8.02	8	8.07	8.07
NOLC1	NOLC1 (ENSG00000166197)	0.6	7.73	7.21	7.48	7.3	7.11	7.12	7.28	7.36
SRPRB	SRPRB (ENSG00000144867)	0.6	5.26	5.44	5.22	5.44	5.22	5.16	5.29	5.27
SLC9A3R1	SLC9A3R1 (ENSG00000109062)	0.6	4.8	4.3	5	4.41	4.2	4.28	4.36	4.54
SCARB1	SCARB1 (ENSG00000073060)	0.6	5.27	4.77	5.19	4.57	4.6	4.65	4.54	4.87
SLC20A1	SLC20A1 (ENSG00000144136)	0.6	5.85	5.64	6.34	6.14	5.08	5.06	5.92	5.96
GLUL	GLUL (ENSG00000135821)	0.6	6.39	6.15	6.05	6.16	6.11	6.15	5.86	5.93
RN7SL239P	RN7SL239P (ENSG00000242999)	0.6	-3	-0.27	-0.76	-0.79	-1.06	-3	-3	-3
CHD1	CHD1 (ENSG00000153922)	0.6	4.89	4.77	4.63	4.63	4.48	4.54	4.67	4.69
NDUFS3	NDUFS3 (ENSG00000213619)	0.6	6.89	6.76	6.5	6.18	6.38	6.48	6.08	6.23
COX8C	COX8C (ENSG00000187581)	0.6	-3	-3	-2.84	-1.89	-3	-3	-3	-3
FAM168B	FAM168B (ENSG00000152102)	0.6	5.9	5.91	6.03	5.9	5.67	5.67	5.92	5.95
STK39	STK39 (ENSG00000198648)	0.6	4.93	3.9	4.1	3.84	3.87	3.95	3.74	3.78
SETP3	SETP3 (ENSG00000266648)	0.59	-2.47	-2.56	-1.56	-3	-3	-2.56	-3	-3
NAF1	NAF1 (ENSG00000145414)	0.59	3.55	3.44	3.39	2.99	3.26	3.22	2.91	3
ANKRD36B	ANKRD36B (ENSG00000196912)	0.59	1.14	0.65	1.58	1.82	0.46	0.87	0.24	1.29
RFFL	RFFL (ENSG00000092871)	0.59	2.99	3.04	3.64	3.11	2.96	2.93	3.04	3
CLDND2	CLDND2 (ENSG00000160318)	0.59	-1.18	-2.06	-0.76	-3	-2.32	-2.4	-2.4	-3
ESYT1	ESYT1 (ENSG00000139641)	0.59	5.5	5.06	5.83	5.31	5	5.03	5.19	5.34
STRAP	STRAP (ENSG00000023734)	0.59	8.02	7.65	7.69	7.41	7.54	7.59	7.36	7.43
ANO6	ANO6 (ENSG00000177119)	0.59	4.52	4.27	4.69	4.06	4.2	4.21	4	4.23
DNAJB3	DNAJB3 (ENSG00000227802)	0.59	-3	-3	-2.64	-0.47	-3	-3	-3	-3
ARHGAP31	ARHGAP31 (ENSG00000031081)	0.59	1.78	1.6	1.23	0.89	1.16	1.17	1	1.03
XKRX	XKRX (ENSG00000182489)	0.59	-3	-3	-1.84	-2.84	-3	-3	-3	-3
MED28P7	MED28P7 (ENSG00000236542)	0.59	-3	-3	-1.84	-2.84	-3	-3	-3	-3
PRPS1P2	PRPS1P2 (ENSG00000232630)	0.59	-0.51	-0.07	-0.03	0.03	-0.4	-0.94	-0.84	-0.01
COX20P1	COX20P1 (ENSG00000213025)	0.59	0.18	-2.06	-1.51	-1.47	-0.79	-3	-3	-3
SNTB2	SNTB2 (ENSG00000168807)	0.59	3.05	2.76	2.69	2.3	2.56	2.53	2.29	2.39
HMGB1	HMGB1 (ENSG00000189403)	0.59	9.42	8.61	8.75	8.76	8.41	8.37	8.67	8.77
MRPL51	MRPL51 (ENSG00000111639)	0.59	8.24	8.13	8.01	7.81	7.97	8.01	7.69	7.68
PCP4L1	PCP4L1 (ENSG00000248485)	0.59	-3	-3	-1.09	-2.74	-3	-3	-3	-3
BARD1	BARD1 (ENSG00000138376)	0.59	3.71	2.59	2.88	2.15	2.32	2.32	2.32	2.55
ATG4A	ATG4A (ENSG00000101844)	0.59	3.38	3.58	4.87	3.38	3.39	3.34	3.25	3.39
STRIP1	STRIP1 (ENSG00000143093)	0.59	3.99	3.94	3.77	3.83	3.77	3.86	3.59	3.81
PBDC1	PBDC1 (ENSG00000102390)	0.59	5.89	6.17	5.79	5.57	5.8	5.71	5.47	5.44
GGCX	GGCX (ENSG00000115486)	0.59	4.16	4.21	4.3	4.21	4.2	3.97	4.08	4.22
PLCB1	PLCB1 (ENSG00000182621)	0.59	3.29	3.83	3.69	3.08	3.18	3.27	3.3	3.16
PGM2L1	PGM2L1 (ENSG00000165434)	0.59	1.24	0.93	2.02	0.93	0.62	0.72	0.82	1.18
SLITRK3	SLITRK3 (ENSG00000121871)	0.59	-2.64	-2.84	-3	-3	-3	-2.94	-3	-3
TRPM8	TRPM8 (ENSG00000144481)	0.59	-3	-2.74	-2.84	-3	-3	-2.94	-3	-3
EIF4EP2	EIF4EP2 (ENSG00000229944)	0.59	3.67	3.32	3.27	3.44	3.12	3.15	3.43	3.25
DNAJC3	DNAJC3 (ENSG00000102580)	0.58	3.5	3.66	3.84	3.46	3.35	3.27	3.48	3.61
ADAMTS17	ADAMTS17 (ENSG00000140470)	0.58	-1.36	-2.74	-1.6	-2.94	-3	-2.64	-3	-2.47
DHX37	DHX37 (ENSG00000150990)	0.58	3.39	3.32	3.58	3.62	3.44	3.33	3.26	3.36
RBMX	RBMX (ENSG00000147274)	0.58	8.84	8.39	8.7	8.51	8.28	8.22	8.5	8.58
TPRKBP2	TPRKBP2 (ENSG00000260452)	0.58	-2.94	-3	-3	-2.56	-3	-3	-3	-3
EVL	EVL (ENSG00000196405)	0.58	4.13	3.18	3.77	3.67	3.42	3.35	3.1	3.54
GABBR2	GABBR2 (ENSG00000136928)	0.58	-2.12	-3	-2.47	-3	-2.94	-2.84	-3	-3
C15orf65	C15orf65 (ENSG00000261652)	0.58	-0.6	-1.6	-0.56	-0.36	-1.84	-1.56	-1.06	-0.94
LMBR1	LMBR1 (ENSG00000105983)	0.58	4.75	4.59	5.04	4.52	4.55	4.4	4.5	4.66
HSPE1	HSPE1 (ENSG00000115541)	0.58	10.47	9.8	9.83	9.48	9.72	9.67	9.46	9.33
SGOL2	SGOL2 (ENSG00000163535)	0.58	5.04	4.22	4.42	3.93	4.06	4.07	3.97	4.2
JPH1	JPH1 (ENSG00000104369)	0.58	2.76	1.89	1.58	1.53	1.59	1.63	1.28	1.57
RAD54B	RAD54B (ENSG00000197275)	0.58	4.56	4.6	5.17	3.89	4.27	4.29	4.08	4.13
DNA2	DNA2 (ENSG00000138346)	0.58	4.35	3.86	3.76	3.27	3.42	3.65	3.23	3.51
GSPT1	GSPT1 (ENSG00000103342)	0.58	7.36	7	6.71	6.75	6.76	6.76	6.68	6.8
RAB29	RAB29 (ENSG00000117280)	0.58	4.64	4.58	4.62	4.44	4.28	4.28	4.53	4.6
IDI1	IDI1 (ENSG00000067064)	0.58	5.82	5.57	6.87	5.17	5.16	5.26	5.17	5.64
TOP1MT	TOP1MT (ENSG00000184428)	0.58	5.15	4.88	4.8	4.21	4.76	4.55	3.86	3.91
LRP8	LRP8 (ENSG00000157193)	0.58	4.85	4.2	5.01	3.84	4.02	4.09	3.93	4.26
RAB39A	RAB39A (ENSG00000179331)	0.58	2.52	2.04	2.9	1.24	1.82	1.95	1.18	1.04
PPIG	PPIG (ENSG00000138398)	0.58	5.55	5.68	5.9	5.73	5.45	5.43	5.69	5.66
FALEC	FALEC (ENSG00000228126)	0.58	-1.94	-1.64	-1.03	-2.06	-1.25	-3	-2.4	-3
SEPT14P8	SEPT14P8 (ENSG00000255464)	0.58	-3	0.71	3.41	1.84	1.02	-3	-3	-3
PTCD3	PTCD3 (ENSG00000132300)	0.58	5.82	5.77	5.86	5.92	5.64	5.77	5.62	5.89
LILRB3	LILRB3 (ENSG00000204577)	0.58	-3	-1.6	-2.84	-3	-3	-3	-3	-3
ZNF696	ZNF696 (ENSG00000185730)	0.58	1.49	1.54	1.24	1.53	1.26	1.16	1.1	1.53
KRT1	KRT1 (ENSG00000167768)	0.58	-3	-3	-2	-1.56	-3	-2.64	-3	-3
RLIM	RLIM (ENSG00000131263)	0.57	4.6	4.62	4.59	4.43	4.52	4.52	4.38	4.48
ATP1A1	ATP1A1 (ENSG00000163399)	0.57	7.82	7.28	7.52	7.47	7.07	7.13	7.44	7.46
ITGAX	ITGAX (ENSG00000140678)	0.57	-1.4	-2.18	-2.84	-3	-2.84	-2.64	-3	-3
EMC2	EMC2 (ENSG00000104412)	0.57	6.32	6.41	6.91	6.29	6.36	6.34	6.16	6.16
COX7CP1	COX7CP1 (ENSG00000235957)	0.57	2.71	2.22	1.79	2.74	1.38	2.32	2.03	-3
ERCC6L	ERCC6L (ENSG00000186871)	0.57	4.31	3.98	4.02	3.54	3.82	3.78	3.56	3.68
CKS2	CKS2 (ENSG00000123975)	0.57	9.37	9.21	8.94	8.63	8.91	8.87	8.63	8.71
RAB7A	RAB7A (ENSG00000075785)	0.57	7.43	7.41	7.62	7.38	7.36	7.36	7.42	7.39
ATP2C2	ATP2C2 (ENSG00000064270)	0.57	0.72	0.37	0.9	0.33	-0.15	-0.04	0.97	-0.6
TNPO1	TNPO1 (ENSG00000083312)	0.57	6.8	6.26	5.92	6.08	6.08	6.02	5.95	6.01
CAMKV	CAMKV (ENSG00000164076)	0.57	-3	-3	-0.56	-2.74	-3	-3	-3	-3
RPL9P2	RPL9P2 (ENSG00000234324)	0.57	-2.47	-3	-3	-2.94	-3	-3	-3	-3
SSBP2	SSBP2 (ENSG00000145687)	0.57	2.93	2.37	2.48	2.74	2.62	2.41	2.26	2.24
ALAS1	ALAS1 (ENSG00000023330)	0.57	5.59	5.73	5.68	5.01	5.39	5.37	4.93	5
EIF4E	EIF4E (ENSG00000151247)	0.57	7.18	6.95	6.77	6.98	6.71	6.51	6.93	6.91
ELAC2	ELAC2 (ENSG00000006744)	0.57	5.17	5.12	4.91	5.21	5.07	4.97	4.95	5
HAGLROS	HAGLROS (ENSG00000226363)	0.57	-3	-3	-1.74	-2.25	-3	-3	-2.94	-2.74
PRKCD	PRKCD (ENSG00000163932)	0.57	4.19	3.7	4.13	3.61	3.73	3.71	3.52	3.76
C12orf45	C12orf45 (ENSG00000151131)	0.57	4.61	4.18	4.08	4.11	3.88	4.1	4.09	4.11
HMGB1P5	HMGB1P5 (ENSG00000132967)	0.57	7.22	6.69	6.52	6.67	6.17	6.02	6.7	6.7
SPRYD3	SPRYD3 (ENSG00000167778)	0.57	3.97	3.92	4.49	3.84	3.93	3.83	3.76	3.85
MT-CO3	MT-CO3 (ENSG00000198938)	0.57	13.21	12.92	13.57	13.18	12.91	12.92	13.16	13
PMS2P1	PMS2P1 (ENSG00000078319)	0.57	3.13	2.73	2.52	2.63	2.74	2.5	2.34	2.46
WWC3	WWC3 (ENSG00000047644)	0.57	2.07	1.81	1.73	1.54	1.63	1.79	1.34	1.42
YKT6	YKT6 (ENSG00000106636)	0.57	6.61	6.72	6.99	6.75	6.6	6.62	6.65	6.72
SIAH2-AS1	SIAH2-AS1 (ENSG00000244265)	0.57	-2.74	-3	-1.29	-2.32	-3	-2.56	-3	-3
LONRF1	LONRF1 (ENSG00000154359)	0.57	2.71	2.36	3.19	2.65	1.77	2.01	2.69	2.64
CSK	CSK (ENSG00000103653)	0.57	5.62	5.22	5.09	4.94	5.1	5.08	4.83	4.92
GLCE	GLCE (ENSG00000138604)	0.57	3.51	3.47	3.64	2.93	3.33	3.18	2.97	2.92
TJP2	TJP2 (ENSG00000119139)	0.57	5.63	4.89	5.22	4.98	4.23	4.22	4.98	5.31
CDH6	CDH6 (ENSG00000113361)	0.57	-0.76	-3	-2.4	-2.47	-3	-3	-2.64	-2.64
EML4	EML4 (ENSG00000143924)	0.56	4.43	4.14	4.46	4.27	3.86	3.83	4.21	4.42
DAZAP1	DAZAP1 (ENSG00000071626)	0.56	6.67	5.77	5.77	5.94	5.8	5.76	5.8	5.79
PAPOLA	PAPOLA (ENSG00000090060)	0.56	6.83	6.77	6.95	6.69	6.54	6.58	6.77	6.8
VN2R17P	VN2R17P (ENSG00000213014)	0.56	-3	-3	-2.4	-2.94	-3	-3	-3	-3
DDX39B-AS1	DDX39B-AS1 (ENSG00000234006)	0.56	-3	-2.94	-3	-2.4	-3	-3	-3	-3
APEX2	APEX2 (ENSG00000169188)	0.56	4.64	4.67	4.44	4.43	4.55	4.45	4.35	4.32
E2F8	E2F8 (ENSG00000129173)	0.56	2.63	1.99	2.05	1.71	1.48	1.29	1.8	2.12
RN7SL657P	RN7SL657P (ENSG00000264293)	0.56	-2.84	-2.84	0.6	-3	-3	-3	-3	-3
PEA15	PEA15 (ENSG00000162734)	0.56	7.47	7.91	7.43	7.52	7.47	7.47	7.42	7.41
STARD7	STARD7 (ENSG00000084090)	0.56	6.48	6.2	5.96	6.16	5.95	5.94	6.11	6.11
TNPO3	TNPO3 (ENSG00000064419)	0.56	5.22	5.29	5.07	4.84	5.02	5.04	4.8	4.81
ZCCHC2	ZCCHC2 (ENSG00000141664)	0.56	1.95	1.71	1.88	1.98	1.55	1.38	1.85	1.91
GXYLT1	GXYLT1 (ENSG00000151233)	0.56	4.14	3.83	3.71	3.81	3.57	3.57	3.68	3.91
HNRNPR	HNRNPR (ENSG00000125944)	0.56	7.64	7.05	6.78	7.16	6.81	6.76	7.02	6.97
RTN4RL2	RTN4RL2 (ENSG00000186907)	0.56	-0.84	-2.12	-3	-1.12	-3	-3	-1.89	-2.56
USP5	USP5 (ENSG00000111667)	0.56	6.66	6.18	6.61	6.22	6.07	6.12	6.15	6.43
LSM4	LSM4 (ENSG00000130520)	0.56	6.81	6.31	6.67	6.87	6.36	6.2	6.53	6.61
PDPK1	PDPK1 (ENSG00000140992)	0.56	3.91	4.15	3.71	3.7	3.82	3.74	3.48	3.63
PROSER2-AS1	PROSER2-AS1 (ENSG00000225778)	0.56	-3	-3	-2.94	-2.32	-3	-3	-3	-3
EIF3LP3	EIF3LP3 (ENSG00000226086)	0.55	-2.94	-2.94	-1.6	-3	-3	-3	-3	-3
MSNP1	MSNP1 (ENSG00000251593)	0.55	-2.06	-2.32	-3	-3	-2.74	-3	-3	-3
MAPRE3	MAPRE3 (ENSG00000084764)	0.55	2.34	2.29	2.94	2.43	2.31	2.27	2.37	2.29
BIVM-ERCC5	BIVM-ERCC5 (ENSG00000270181)	0.55	2.6	2.6	2.55	2.51	2.59	2.49	2.25	2.51
RP2	RP2 (ENSG00000102218)	0.55	4.07	3.95	4.52	3.78	3.67	3.72	3.84	4.03
WDR4	WDR4 (ENSG00000160193)	0.55	4.26	3.28	3.63	4.05	2.89	3.15	3.53	3.8
THADA	THADA (ENSG00000115970)	0.55	4.19	4.3	3.82	3.85	3.89	3.89	3.79	3.92
MCCC1-AS1	MCCC1-AS1 (ENSG00000243368)	0.55	-3	-1.4	-0.17	-1.79	-1.94	-2.4	-2.56	-3
GCFC2	GCFC2 (ENSG00000005436)	0.55	4.5	4.35	4.15	3.76	4.07	3.94	3.84	3.98
MCM7	MCM7 (ENSG00000166508)	0.55	7.54	6.7	6.6	6.3	6.53	6.53	6.19	6.35
MTHFD1	MTHFD1 (ENSG00000100714)	0.55	7.37	7.09	7.48	7.34	6.78	6.79	7.25	7.4
SAP30L	SAP30L (ENSG00000164576)	0.55	3.88	4.08	4.18	3.37	3.52	3.78	3.66	3.46
ANKRD30BP2	ANKRD30BP2 (ENSG00000224309)	0.55	-2.94	-2.25	-3	-3	-3	-3	-3	-3
TBCE	TBCE (ENSG00000116957)	0.55	5.49	5.53	5.11	5.29	5.17	5.16	5.3	5.23
DRICH1	DRICH1 (ENSG00000189269)	0.55	-3	-3	-2	-2.06	-3	-3	-2.74	-2.84
TMEM106C	TMEM106C (ENSG00000134291)	0.55	7.62	7.67	7.38	7.16	7.38	7.35	7.07	7.18
MT-ND6	MT-ND6 (ENSG00000198695)	0.55	9.52	9.89	10.21	9.86	9.74	9.7	9.67	9.36
RRM2	RRM2 (ENSG00000171848)	0.55	7.59	7.02	7.95	7.07	6.82	6.95	7.13	7.3
TCF7L1	TCF7L1 (ENSG00000152284)	0.55	-3	-3	-1.64	-2.4	-3	-3	-3	-2.74
BCL2L2	BCL2L2 (ENSG00000129473)	0.55	4.21	4.38	4.47	4.31	4.27	4.29	4.14	4.28
OR8R1P	OR8R1P (ENSG00000256347)	0.55	-3	-3	-2.18	-0.79	-3	-3	-3	-2.64
GLS	GLS (ENSG00000115419)	0.55	5.97	5.64	6.53	6.05	5.49	5.39	5.84	6.02
DNAJA1	DNAJA1 (ENSG00000086061)	0.55	8.04	7.68	8.1	7.94	7.44	7.36	7.98	7.89
ZNF221	ZNF221 (ENSG00000159905)	0.55	-0.23	-0.74	0.96	-0.29	-0.92	-1.4	-0.09	-0.67
UBE2CP2	UBE2CP2 (ENSG00000265939)	0.55	-3	-0.51	-2.74	-3	-3	-2.94	-3	-3
NUP54	NUP54 (ENSG00000138750)	0.55	5.22	5.2	5.18	5.16	5	4.93	5.17	5.26
RWDD4P1	RWDD4P1 (ENSG00000244490)	0.55	-1.74	-1.51	-1.36	-0.43	-2.94	-2.06	-3	-0.67
CREM	CREM (ENSG00000095794)	0.54	5.47	5.67	6.56	5.43	5.26	5.24	5.52	5.57
HAT1	HAT1 (ENSG00000128708)	0.54	6.87	6.6	6.59	6.12	6.42	6.39	6.2	6.25
SZRD1	SZRD1 (ENSG00000055070)	0.54	6.82	6.38	7	6.73	6.55	6.49	6.57	6.63
CDKN3	CDKN3 (ENSG00000100526)	0.54	6.71	6.14	6.01	5.55	5.77	5.89	5.78	5.81
ZNF324B	ZNF324B (ENSG00000249471)	0.54	1.24	0.74	1.28	1.82	-0.15	0.66	0.91	1.34
ZNF615	ZNF615 (ENSG00000197619)	0.54	1.43	1.63	2.2	1.72	1.63	1.54	1.49	0.99
KLK5	KLK5 (ENSG00000167754)	0.54	-3	-3	-2.12	-2.94	-3	-3	-3	-3
ATAD2	ATAD2 (ENSG00000156802)	0.54	5.82	5.74	5.64	5.15	5.44	5.4	5.13	5.4
CCAR2	CCAR2 (ENSG00000158941)	0.54	6.09	5.79	6.24	6.19	5.72	5.83	5.91	6.09
RAB8A	RAB8A (ENSG00000167461)	0.54	6.06	6.08	6.23	6.28	5.72	5.68	6.26	6.11
VCP	VCP (ENSG00000165280)	0.54	7.96	7.4	8.05	7.76	7.25	7.31	7.69	7.74
SLC39A14	SLC39A14 (ENSG00000104635)	0.54	4.88	5.14	4.98	4.72	4.79	4.82	4.72	4.88
ENTPD6	ENTPD6 (ENSG00000197586)	0.54	5	4.95	5.08	4.93	4.98	4.97	4.63	4.87
BTN3A2	BTN3A2 (ENSG00000186470)	0.54	4.15	3.82	4.64	3.57	3.8	3.76	3.43	3.79
MED12L	MED12L (ENSG00000144893)	0.54	-0.67	-2.18	-3	-2.94	-2.74	-2.74	-3	-3
USP7	USP7 (ENSG00000187555)	0.54	5.74	5.62	5.4	5.52	5.38	5.41	5.48	5.54
ETF1	ETF1 (ENSG00000120705)	0.54	7.04	6.74	6.59	6.52	6.59	6.57	6.54	6.61
CHST10	CHST10 (ENSG00000115526)	0.54	3.98	3.76	3.21	3.48	3.42	3.4	3.35	3.44
IGFBP5	IGFBP5 (ENSG00000115461)	0.54	-1.29	-3	-2.25	-3	-2.84	-3	-2.74	-3
HES6	HES6 (ENSG00000144485)	0.54	0.49	-0.22	0.71	0.07	-0.84	-0.76	0.23	0.24
SYDE2	SYDE2 (ENSG00000097096)	0.54	1.74	1.87	1.88	1.22	1.48	1.59	1.33	1.41
GNA12	GNA12 (ENSG00000146535)	0.54	4.91	4.67	4.63	4.46	4.6	4.63	4.28	4.4
TRAPPC2B	TRAPPC2B (ENSG00000256060)	0.54	3.67	3.87	4.36	4.02	3.76	3.71	3.93	3.66
DENND3	DENND3 (ENSG00000105339)	0.54	3.58	3.24	3.64	3.44	3.28	3.31	3.28	3.46
PKMP3	PKMP3 (ENSG00000220563)	0.54	-1.84	-2.64	-3	-3	-2.84	-3	-3	-3
UBIAD1	UBIAD1 (ENSG00000120942)	0.54	3.75	3.97	3.66	3.32	3.58	3.57	3.32	3.33
COX5A	COX5A (ENSG00000178741)	0.54	7.82	7.62	7.61	7.7	7.59	7.58	7.69	7.55
BOLA2B	BOLA2B (ENSG00000169627)	0.54	7.34	6.86	7.36	6.99	7.01	6.77	7.02	6.97
PTGES3P2	PTGES3P2 (ENSG00000217643)	0.54	-3	-3	-2.56	-2.56	-3	-3	-2.84	-3
RPGRIP1	RPGRIP1 (ENSG00000092200)	0.54	-3	-3	-1	-1.29	-3	-3	-3	-2.32
SMG1P4	SMG1P4 (ENSG00000185710)	0.54	1.91	2.66	2.61	2.76	2.62	2.24	1.64	1.49
IMMP2L	IMMP2L (ENSG00000184903)	0.54	3.61	3.48	3.98	3.48	3.53	3.53	3.44	3.23
CCZ1B	CCZ1B (ENSG00000146574)	0.53	4.81	4.94	5.28	5.1	4.73	4.69	5.02	4.93
VKORC1L1	VKORC1L1 (ENSG00000196715)	0.53	4.45	3.91	4.18	3.83	3.82	3.72	3.8	4.09
MGME1	MGME1 (ENSG00000125871)	0.53	4.93	5.24	5.33	5.04	4.97	4.93	5.05	5.06
RPL23AP76	RPL23AP76 (ENSG00000226156)	0.53	-1.84	-2.94	-3	-3	-3	-3	-3	-3
LRRC48	LRRC48 (ENSG00000171962)	0.53	-1.47	-0.49	0.06	-0.79	-1.29	-1.32	-0.79	-1.18
ANKRD9	ANKRD9 (ENSG00000156381)	0.53	1.42	1.47	2.2	0.91	1.26	1.42	0.24	0.83
RBM27	RBM27 (ENSG00000091009)	0.53	4.12	4.18	4.02	3.79	3.95	3.89	3.81	3.94
TOR1B	TOR1B (ENSG00000136816)	0.53	4.6	4.81	5.16	4.09	4.37	4.52	4.22	4.34
PIP4K2A	PIP4K2A (ENSG00000150867)	0.53	4.49	4.19	5.12	4.59	4.05	3.94	4.47	4.5
RAC1P2	RAC1P2 (ENSG00000249936)	0.53	2.31	1.91	1.3	1.75	0.62	1.18	1.82	1.64
NFATC3	NFATC3 (ENSG00000072736)	0.53	2.63	3.14	2.91	2.72	2.76	2.79	2.52	2.58
CLN6	CLN6 (ENSG00000128973)	0.53	4.51	4.44	3.95	4.35	4.13	4.23	4.11	4.14
TRAPPC2L	TRAPPC2L (ENSG00000167515)	0.53	6.74	6.19	6.4	6.74	6.22	6.19	6.46	6.36
NIPAL2	NIPAL2 (ENSG00000104361)	0.53	1.61	2.17	2.1	1.59	1.68	1.96	0.62	1.33
KIF2C	KIF2C (ENSG00000142945)	0.53	6.39	5.94	5.82	5.74	5.56	5.63	5.74	5.98
NPM1P9	NPM1P9 (ENSG00000231066)	0.53	-0.27	-0.81	0.49	-0.3	-0.38	-0.49	-0.84	-0.79
NFYC-AS1	NFYC-AS1 (ENSG00000272145)	0.53	-0.74	-0.34	-0.43	-0.49	-0.79	-0.1	-1.47	-1.29
RAD54L	RAD54L (ENSG00000085999)	0.53	4.88	3.71	3.59	3.28	3.55	3.65	2.86	3.16
CSPG4P12	CSPG4P12 (ENSG00000259295)	0.53	-3	-3	-2.56	0.67	-2.94	-2.84	-3	-3
MED7	MED7 (ENSG00000155868)	0.53	4.46	4.13	4.83	4.31	4.12	3.83	4.39	4.26
ATP5HP4	ATP5HP4 (ENSG00000234925)	0.53	-3	-3	-2.47	-0.97	-2.74	-3	-3	-3
FAM98B	FAM98B (ENSG00000171262)	0.53	5.37	5.07	5.24	5.22	4.88	4.86	5.19	5.27
MRPL13	MRPL13 (ENSG00000172172)	0.53	6.73	6.59	6.56	6.69	6.25	6.3	6.7	6.66
UBAP2	UBAP2 (ENSG00000137073)	0.52	4.68	4.15	4.58	4.59	3.96	3.9	4.48	4.48
ATP6V1D	ATP6V1D (ENSG00000100554)	0.52	6.7	7	6.86	6.23	6.54	6.64	6.29	6.18
KHDRBS3	KHDRBS3 (ENSG00000131773)	0.52	3.6	1.52	1.73	0.71	1.56	1.12	0.8	0.73
POP1	POP1 (ENSG00000104356)	0.52	4.29	4.12	4.57	4.41	3.78	3.73	4.36	4.38
SIMC1	SIMC1 (ENSG00000170085)	0.52	3.9	3.07	3.76	2.65	2.96	2.85	3.05	3.06
SECTM1	SECTM1 (ENSG00000141574)	0.52	-1.4	-3	-2.94	-3	-3	-3	-3	-3
ZMYND19	ZMYND19 (ENSG00000165724)	0.52	4.5	4.31	4.67	4.42	4.32	4.45	4.3	4.38
PROM1	PROM1 (ENSG00000007062)	0.52	-3	-3	-1.32	-2.94	-3	-3	-3	-3
ADCY1	ADCY1 (ENSG00000164742)	0.52	1.17	0.12	-0.12	-1.06	-0.17	-0.29	-1.15	-1.79
YWHAQ	YWHAQ (ENSG00000134308)	0.52	8.25	8.01	7.88	8.05	7.87	7.85	7.99	7.99
SUSD6	SUSD6 (ENSG00000100647)	0.52	1.71	1.74	1.99	2	1.41	1.4	1.71	2
SESTD1	SESTD1 (ENSG00000187231)	0.52	2.99	2.59	3.88	3.51	2.54	2.49	2.89	3.18
ZNF283	ZNF283 (ENSG00000167637)	0.52	1.67	1.77	1.46	1.52	1.71	1.33	1.44	1.19
FANCB	FANCB (ENSG00000181544)	0.52	2.15	2.18	2.58	1.87	2.09	2.07	1.6	1.94
SOX30	SOX30 (ENSG00000039600)	0.52	-3	-2.94	-1.15	-3	-3	-3	-3	-3
ZC3HAV1	ZC3HAV1 (ENSG00000105939)	0.52	4.27	3.96	4.2	3.79	3.72	3.69	3.93	4.06
TTF2	TTF2 (ENSG00000116830)	0.52	4.54	4.33	4.2	3.81	3.97	4.31	3.5	3.76
MLLT4-AS1	MLLT4-AS1 (ENSG00000198221)	0.52	-3	-3	-0.97	-2.94	-3	-3	-3	-3
TMEM176B	TMEM176B (ENSG00000106565)	0.52	-3	-3	-1.74	-1.29	-3	-3	-2.56	-2.74
UBQLN1	UBQLN1 (ENSG00000135018)	0.52	6.42	6.44	6.33	5.94	6.17	6.23	5.92	6.04
DDX11-AS1	DDX11-AS1 (ENSG00000245614)	0.52	1.13	0.84	0.65	0.07	0.72	0.45	-0.27	-0.1
PITX3	PITX3 (ENSG00000107859)	0.52	-3	-3	-0.38	-1.4	-3	-3	-2.25	-2.94
DIS3	DIS3 (ENSG00000083520)	0.52	4.89	4.91	5	4.77	4.8	4.73	4.8	4.9
XPO4	XPO4 (ENSG00000132953)	0.52	4.01	3.79	4.04	3.34	3.73	3.63	3.34	3.48
SLC12A2	SLC12A2 (ENSG00000064651)	0.52	2.74	2.77	3.71	2.71	2.55	2.41	2.72	2.85
RNVU1-7	RNVU1-7 (ENSG00000206585)	0.52	6.84	8.36	-3	7.01	-3	-3	7.04	-3
TULP3	TULP3 (ENSG00000078246)	0.52	4.59	4.33	4.32	4.19	4.21	4.2	4.18	4.34
PIANP	PIANP (ENSG00000139200)	0.52	-1.29	-2.32	-3	-3	-2.64	-3	-3	-3
MAD2L2	MAD2L2 (ENSG00000116670)	0.51	5.16	4.56	4.69	4.62	4.53	4.61	4.4	4.67
TUBA1B	TUBA1B (ENSG00000123416)	0.51	11.54	10.56	10.68	10.77	10.34	10.34	10.74	10.75
RAB11FIP2	RAB11FIP2 (ENSG00000107560)	0.51	3.22	3.65	3.54	3.28	3.38	3.29	3.02	3.26
MED1	MED1 (ENSG00000125686)	0.51	5.12	5.42	5.72	5.44	5.2	5.22	5.32	5.32
RBFA	RBFA (ENSG00000101546)	0.51	4.02	3.64	3.98	3.37	3.54	3.79	3.18	3.34
KIFC1	KIFC1 (ENSG00000237649)	0.51	5.53	5.15	5.08	4.98	5.03	5.04	4.93	5.11
MAPK9	MAPK9 (ENSG00000050748)	0.51	4.87	4.45	5.22	4.73	4.08	4.17	4.72	4.85
TCEA1P2	TCEA1P2 (ENSG00000230409)	0.51	0.55	0.77	0.45	1.05	0.3	0.44	0.63	0.59
LSM11	LSM11 (ENSG00000155858)	0.51	2.11	2.13	2.86	2.02	1.82	1.89	2.13	2.15
CCNE2	CCNE2 (ENSG00000175305)	0.51	4.84	4.29	4.24	3.82	3.68	3.24	3.98	4.42
POLR1B	POLR1B (ENSG00000125630)	0.51	5.35	4.96	5.2	5.17	4.9	4.95	5.05	5.2
CEP72	CEP72 (ENSG00000112877)	0.51	1.8	1.49	1.08	1.34	1.17	1.37	0.84	1.26
TBCA	TBCA (ENSG00000171530)	0.51	8.69	8.57	8.7	8.53	8.5	8.48	8.65	8.54
RPA2	RPA2 (ENSG00000117748)	0.51	6.39	6.2	6.02	5.62	5.91	5.94	5.72	5.77
RFC3	RFC3 (ENSG00000133119)	0.51	5.88	5.48	5.42	5.43	5.37	5.31	5.46	5.48
CHAF1B	CHAF1B (ENSG00000159259)	0.51	3.61	3.07	3.46	3.5	2.71	2.81	3.41	3.44
HNRNPK	HNRNPK (ENSG00000165119)	0.51	9.43	9.14	8.95	9.1	9	8.99	9.06	9.07
SSX6	SSX6 (ENSG00000171483)	0.51	-3	-0.94	-0.3	-3	-2.47	-2.32	-3	-3
SCML2P2	SCML2P2 (ENSG00000271105)	0.51	-2.4	-3	-0.89	-0.1	-3	-1.56	-3	-3
ZNF695	ZNF695 (ENSG00000197472)	0.51	2.77	2.73	2.5	2.61	2.76	2.63	2	2.28
TNFRSF10A	TNFRSF10A (ENSG00000104689)	0.51	2.88	2.83	4.2	3.11	2.68	2.63	2.97	3.04
SYT3	SYT3 (ENSG00000213023)	0.51	-3	-3	-1.29	-1.56	-3	-3	-2.74	-2.47
FOXB1	FOXB1 (ENSG00000171956)	0.51	-3	-3	-1.47	-2	-3	-3	-2.74	-2.64
GEN1	GEN1 (ENSG00000178295)	0.51	2.89	3.72	3.31	2.84	3.03	3.03	2.77	2.84
DPH2	DPH2 (ENSG00000132768)	0.51	5.1	5.13	5.42	4.9	5.01	5.16	4.72	4.85
ZFAND4	ZFAND4 (ENSG00000172671)	0.51	2.26	2.3	2.97	2.52	2.27	1.97	2.3	2.45
HADH	HADH (ENSG00000138796)	0.5	4.94	4.06	4.64	3.96	4.2	4.13	3.97	4.15
WBP11	WBP11 (ENSG00000084463)	0.5	6.59	6.18	5.98	5.81	6.01	6.02	5.76	5.82
ACTR1A	ACTR1A (ENSG00000138107)	0.5	6.67	6.46	6.15	6.23	6.26	6.32	6.15	6.13
SERPINA1	SERPINA1 (ENSG00000197249)	0.5	3.88	2.18	3.89	1.91	2.63	2.68	1.54	1.6
STRA13	STRA13 (ENSG00000169689)	0.5	6.68	6.04	6.27	6.26	6.15	6.07	6.05	6.25
REPS1	REPS1 (ENSG00000135597)	0.5	4.74	4.72	4.5	4.75	4.4	4.47	4.71	4.62
CEP55	CEP55 (ENSG00000138180)	0.5	6.03	5.73	5.37	5.01	5.37	5.39	5.03	5.1
PTGES3	PTGES3 (ENSG00000110958)	0.5	9.23	8.69	9.4	8.8	8.56	8.54	8.91	8.97
C1orf95	C1orf95 (ENSG00000203685)	0.5	-3	-3	-0.49	-2.74	-3	-3	-2.84	-3
VAC14	VAC14 (ENSG00000103043)	0.5	4.38	4.06	4.17	3.97	4.09	4.07	3.74	4
GM2A	GM2A (ENSG00000196743)	0.5	3.92	3.75	4.5	3.68	3.78	3.83	3.58	3.69
USP32P3	USP32P3 (ENSG00000189423)	0.5	-3	-3	-0.29	-1.06	-3	-3	-3	-2.06
HRNR	HRNR (ENSG00000197915)	0.5	-3	-3	-1.94	-2.47	-3	-3	-2.94	-2.74
ZNF771	ZNF771 (ENSG00000179965)	0.5	0.77	1.24	2.08	1.85	0.64	1.34	1.23	0.92
COX7BP1	COX7BP1 (ENSG00000243453)	0.5	0.12	-3	-3	-3	-3	-3	-3	-3
FOCAD-AS1	FOCAD-AS1 (ENSG00000227071)	0.5	0.86	-3	-3	-3	-3	-3	-3	-3
TOP1P1	TOP1P1 (ENSG00000268062)	0.5	-3	0.82	-3	-3	-3	-3	-3	-3
LINC00441	LINC00441 (ENSG00000231473)	0.5	0.79	-3	-3	-3	-3	-3	-3	-3
RN7SL151P	RN7SL151P (ENSG00000244230)	0.5	-3	-3	0.97	-3	-3	-3	-3	-3
CA5A	CA5A (ENSG00000174990)	0.5	-3	-3	0.24	-3	-3	-3	-3	-3
TKTL1	TKTL1 (ENSG00000007350)	0.5	-3	-2.56	-3	-3	-3	-3	-3	-3
RPL7P24	RPL7P24 (ENSG00000240003)	0.5	-3	-3	-3	-2.18	-3	-3	-3	-3
TSNAX-DISC1	TSNAX-DISC1 (ENSG00000270106)	0.5	-3	-3	-2.84	-3	-3	-3	-3	-3
MROH2A	MROH2A (ENSG00000185038)	0.5	-3	-3	-3	-2.94	-3	-3	-3	-3
ADAM21P1	ADAM21P1 (ENSG00000235812)	0.5	-3	-3	-2.18	-3	-3	-3	-3	-3
OR9A3P	OR9A3P (ENSG00000240031)	0.5	-3	-3	-1.4	-3	-3	-3	-3	-3
HMGN1P36	HMGN1P36 (ENSG00000235734)	0.5	-3	-3	-0.76	-3	-3	-3	-3	-3
NUTM2F	NUTM2F (ENSG00000130950)	0.5	-3	-3	-3	-2.74	-3	-3	-3	-3
FBP2	FBP2 (ENSG00000130957)	0.5	-3	-3	-2.84	-3	-3	-3	-3	-3
CYCSP52	CYCSP52 (ENSG00000235700)	0.5	-1.22	-3	-3	-3	-3	-3	-3	-3
MOXD2P	MOXD2P (ENSG00000240268)	0.5	-3	-2.84	-3	-3	-3	-3	-3	-3
CCL25	CCL25 (ENSG00000131142)	0.5	-3	-3	-2.56	-3	-3	-3	-3	-3
VMO1	VMO1 (ENSG00000182853)	0.5	-2.12	-3	-3	-3	-3	-3	-3	-3
HIPK1-AS1	HIPK1-AS1 (ENSG00000235527)	0.5	-3	-2.06	-3	-3	-3	-3	-3	-3
RPL36AP40	RPL36AP40 (ENSG00000240298)	0.5	-3	-3	-3	-1.12	-3	-3	-3	-3
WBP1LP7	WBP1LP7 (ENSG00000269732)	0.5	-3	-3	-1.6	-3	-3	-3	-3	-3
C3orf20	C3orf20 (ENSG00000131379)	0.5	-3	-3	-2.25	-3	-3	-3	-3	-3
SRMS	SRMS (ENSG00000125508)	0.5	-3	-3	-1.29	-3	-3	-3	-3	-3
ESRRAP2	ESRRAP2 (ENSG00000235438)	0.5	-3	-3	-3	-0.51	-3	-3	-3	-3
SPATA8	SPATA8 (ENSG00000185594)	0.5	-3	-3	-2.18	-3	-3	-3	-3	-3
RAMP3	RAMP3 (ENSG00000122679)	0.5	-3	-3	-2.84	-3	-3	-3	-3	-3
GALR2	GALR2 (ENSG00000182687)	0.5	-3	-3	-1.47	-3	-3	-3	-3	-3
RPL5P28	RPL5P28 (ENSG00000235264)	0.5	-3	-3	-3	-2.56	-3	-3	-3	-3
KREMEN2	KREMEN2 (ENSG00000131650)	0.5	-3	-3	-1.84	-3	-3	-3	-3	-3
IGKV1OR2-1	IGKV1OR2-1 (ENSG00000235235)	0.5	-1.84	-3	-3	-3	-3	-3	-3	-3
FAM83C-AS1	FAM83C-AS1 (ENSG00000235214)	0.5	-1.79	-3	-3	-3	-3	-3	-3	-3
C20orf195	C20orf195 (ENSG00000125531)	0.5	-3	-3	-2.25	-3	-3	-3	-3	-3
LINC01525	LINC01525 (ENSG00000235202)	0.5	-3	-3	-1.74	-3	-3	-3	-3	-3
NUCB1-AS1	NUCB1-AS1 (ENSG00000235191)	0.5	-3	-3	-3	-1.25	-3	-3	-3	-3
DNAH9	DNAH9 (ENSG00000007174)	0.5	-3	-3	-2.94	-3	-3	-3	-3	-3
CD79B	CD79B (ENSG00000007312)	0.5	-2.12	-3	-3	-3	-3	-3	-3	-3
NPY	NPY (ENSG00000122585)	0.5	-3	-2.12	-3	-3	-3	-3	-3	-3
PHBP8	PHBP8 (ENSG00000240471)	0.5	-3	-3	-3	-2.64	-3	-3	-3	-3
TNFRSF13B	TNFRSF13B (ENSG00000240505)	0.5	-3	-3	-2.94	-3	-3	-3	-3	-3
RPL21P123	RPL21P123 (ENSG00000240531)	0.5	-3	-3	-2	-3	-3	-3	-3	-3
AADACP1	AADACP1 (ENSG00000240602)	0.5	-3	-2.74	-3	-3	-3	-3	-3	-3
RN7SL403P	RN7SL403P (ENSG00000240625)	0.5	-3	-3	-0.84	-3	-3	-3	-3	-3
SNORD97	SNORD97 (ENSG00000238622)	0.5	-3	-3	-3	4.43	-3	-3	-3	-3
DLEC1	DLEC1 (ENSG00000008226)	0.5	-3	-3	-2.94	-3	-3	-3	-3	-3
ST6GAL2-IT1	ST6GAL2-IT1 (ENSG00000238250)	0.5	-3	-3	-1.84	-3	-3	-3	-3	-3
LINC00676	LINC00676 (ENSG00000234854)	0.5	-3	-3	-2.47	-3	-3	-3	-3	-3
LINC00412	LINC00412 (ENSG00000234772)	0.5	-3	-2.74	-3	-3	-3	-3	-3	-3
CLDN24	CLDN24 (ENSG00000185758)	0.5	-3	-3	-2.47	-3	-3	-3	-3	-3
CECR5-AS1	CECR5-AS1 (ENSG00000185837)	0.5	-3	-3	-3	-1.36	-3	-3	-3	-3
CHL1-AS1	CHL1-AS1 (ENSG00000234661)	0.5	-3	-3	-2.56	-3	-3	-3	-3	-3
LINC01405	LINC01405 (ENSG00000185847)	0.5	-3	-3	-3	-2.84	-3	-3	-3	-3
RHBG	RHBG (ENSG00000132677)	0.5	-3	-3	-1.18	-3	-3	-3	-3	-3
RN7SL559P	RN7SL559P (ENSG00000240750)	0.5	-0.94	-3	-3	-3	-3	-3	-3	-3
MGAT4C	MGAT4C (ENSG00000182050)	0.5	-3	-3	-3	-2.56	-3	-3	-3	-3
TPMTP2	TPMTP2 (ENSG00000234562)	0.5	-2.18	-3	-3	-3	-3	-3	-3	-3
CD81-AS1	CD81-AS1 (ENSG00000238184)	0.5	-3	-3	-1.89	-3	-3	-3	-3	-3
RPL23AP51	RPL23AP51 (ENSG00000269721)	0.5	-3	-3	-2.32	-3	-3	-3	-3	-3
MTUS2	MTUS2 (ENSG00000132938)	0.5	-3	-3	-2.64	-3	-3	-3	-3	-3
SCARNA18	SCARNA18 (ENSG00000238835)	0.5	-3	-3	-3	5.14	-3	-3	-3	-3
TPTE2	TPTE2 (ENSG00000132958)	0.5	-3	-2.94	-3	-3	-3	-3	-3	-3
LRAT	LRAT (ENSG00000121207)	0.5	-3	-3	-2.94	-3	-3	-3	-3	-3
CLDN34	CLDN34 (ENSG00000234469)	0.5	-3	-3	-3	-2.4	-3	-3	-3	-3
PCDHGC5	PCDHGC5 (ENSG00000240764)	0.5	-2.64	-3	-3	-3	-3	-3	-3	-3
BMP8A	BMP8A (ENSG00000183682)	0.5	-3	-3	-2.47	-3	-3	-3	-3	-3
FDX1P1	FDX1P1 (ENSG00000181741)	0.5	-3	-3	-2.94	-3	-3	-3	-3	-3
CYP4F12	CYP4F12 (ENSG00000186204)	0.5	-3	-3	-0.12	-3	-3	-3	-3	-3
PLCXD2-AS1	PLCXD2-AS1 (ENSG00000240766)	0.5	-3	-1.22	-3	-3	-3	-3	-3	-3
ATP8A2P1	ATP8A2P1 (ENSG00000240800)	0.5	-3	-3	-2.94	-3	-3	-3	-3	-3
LARGE	LARGE (ENSG00000133424)	0.5	-3	-3	-2.12	-3	-3	-3	-3	-3
EDDM3B	EDDM3B (ENSG00000181552)	0.5	-3	-3	-2.56	-3	-3	-3	-3	-3
RN7SL521P	RN7SL521P (ENSG00000240877)	0.5	-0.94	-3	-3	-3	-3	-3	-3	-3
RPS12P2	RPS12P2 (ENSG00000234319)	0.5	-3	-3	-0.27	-3	-3	-3	-3	-3
RN7SL751P	RN7SL751P (ENSG00000240964)	0.5	-0.84	-3	-3	-3	-3	-3	-3	-3
RPL21P10	RPL21P10 (ENSG00000239272)	0.5	-3	-2.18	-3	-3	-3	-3	-3	-3
AATK	AATK (ENSG00000181409)	0.5	-3	-3	-3	-2.84	-3	-3	-3	-3
SEPT7P6	SEPT7P6 (ENSG00000241007)	0.5	-2.84	-3	-3	-3	-3	-3	-3	-3
NPW	NPW (ENSG00000183971)	0.5	-3	-3	-1.94	-3	-3	-3	-3	-3
OSTCP5	OSTCP5 (ENSG00000234315)	0.5	-3	-3	-2.4	-3	-3	-3	-3	-3
SOX5	SOX5 (ENSG00000134532)	0.5	-2.94	-3	-3	-3	-3	-3	-3	-3
RERG	RERG (ENSG00000134533)	0.5	-3	-2.74	-3	-3	-3	-3	-3	-3
HSP90AA6P	HSP90AA6P (ENSG00000181359)	0.5	-3	-3	-3	-2.74	-3	-3	-3	-3
MTHFD2P7	MTHFD2P7 (ENSG00000181260)	0.5	-3	-3	-2	-3	-3	-3	-3	-3
LINC00881	LINC00881 (ENSG00000241135)	0.5	-3	-2.12	-3	-3	-3	-3	-3	-3
HLA-V	HLA-V (ENSG00000181126)	0.5	-3	-3	-3	-2.74	-3	-3	-3	-3
ETV5-AS1	ETV5-AS1 (ENSG00000234197)	0.5	-2.47	-3	-3	-3	-3	-3	-3	-3
CRHR1	CRHR1 (ENSG00000120088)	0.5	-3	-3	-2.4	-3	-3	-3	-3	-3
TGM3	TGM3 (ENSG00000125780)	0.5	-3	-3	-1.94	-3	-3	-3	-3	-3
ADAMTS9-AS1	ADAMTS9-AS1 (ENSG00000241158)	0.5	-3	-3	-2.4	-3	-3	-3	-3	-3
MTND4P26	MTND4P26 (ENSG00000234065)	0.5	-3	-3	-1.6	-3	-3	-3	-3	-3
RPL34P33	RPL34P33 (ENSG00000241282)	0.5	-3	-1.79	-3	-3	-3	-3	-3	-3
HRK	HRK (ENSG00000135116)	0.5	-3	-3	-2.74	-3	-3	-3	-3	-3
TMEM97P1	TMEM97P1 (ENSG00000234030)	0.5	-3	-3	-3	-2.4	-3	-3	-3	-3
RPL35AP33	RPL35AP33 (ENSG00000241334)	0.5	-1.56	-3	-3	-3	-3	-3	-3	-3
PRPH	PRPH (ENSG00000135406)	0.5	-3	-3	-3	-2.64	-3	-3	-3	-3
FCRL6	FCRL6 (ENSG00000181036)	0.5	-2.47	-3	-3	-3	-3	-3	-3	-3
FAM228A	FAM228A (ENSG00000186453)	0.5	-3	-3	-2.4	-3	-3	-3	-3	-3
KRTAP5-AS1	KRTAP5-AS1 (ENSG00000233930)	0.5	-3	-3	-1.69	-3	-3	-3	-3	-3
IGKV3-11	IGKV3-11 (ENSG00000241351)	0.5	-3	-2.47	-3	-3	-3	-3	-3	-3
LINC01136	LINC01136 (ENSG00000233791)	0.5	-3	-3	-3	-1.03	-3	-3	-3	-3
MZT1P2	MZT1P2 (ENSG00000271404)	0.5	-3	-3	0.16	-3	-3	-3	-3	-3
EGR4	EGR4 (ENSG00000135625)	0.5	-3	-3	-2.84	-3	-3	-3	-3	-3
RPL7P19	RPL7P19 (ENSG00000241458)	0.5	-3	-2.84	-3	-3	-3	-3	-3	-3
CDC27P1	CDC27P1 (ENSG00000233786)	0.5	-3	-3	-2.56	-3	-3	-3	-3	-3
LINC01251	LINC01251 (ENSG00000233776)	0.5	-2.32	-3	-3	-3	-3	-3	-3	-3
RN7SL182P	RN7SL182P (ENSG00000241461)	0.5	-3	-1.29	-3	-3	-3	-3	-3	-3
MYCNOS	MYCNOS (ENSG00000233718)	0.5	-3	-3	-3	-2.84	-3	-3	-3	-3
SSX2	SSX2 (ENSG00000241476)	0.5	-3	-2.32	-3	-3	-3	-3	-3	-3
RN7SL767P	RN7SL767P (ENSG00000241529)	0.5	-3	-3	-0.42	-3	-3	-3	-3	-3
ENO1P4	ENO1P4 (ENSG00000241790)	0.5	-3	-3	-1.29	-3	-3	-3	-3	-3
OR56B4	OR56B4 (ENSG00000180919)	0.5	-3	-3	-2	-3	-3	-3	-3	-3
DCUN1D2-AS	DCUN1D2-AS (ENSG00000233613)	0.5	-3	-3	-1.06	-3	-3	-3	-3	-3
LINC00462	LINC00462 (ENSG00000233610)	0.5	-3	-3	-2.64	-3	-3	-3	-3	-3
GIPR	GIPR (ENSG00000010310)	0.5	-3	-3	-1.25	-3	-3	-3	-3	-3
ERI3-IT1	ERI3-IT1 (ENSG00000233602)	0.5	-3	-2.84	-3	-3	-3	-3	-3	-3
RAD1P2	RAD1P2 (ENSG00000233473)	0.5	-3	-2.47	-3	-3	-3	-3	-3	-3
RN7SL566P	RN7SL566P (ENSG00000241983)	0.5	-3	-3	0.3	-3	-3	-3	-3	-3
RN7SL68P	RN7SL68P (ENSG00000242020)	0.5	-3	-1.43	-3	-3	-3	-3	-3	-3
RPL11P5	RPL11P5 (ENSG00000242137)	0.5	-3	-3	-2.84	-3	-3	-3	-3	-3
CNR1	CNR1 (ENSG00000118432)	0.5	-3	-3	-1.89	-3	-3	-3	-3	-3
TTR	TTR (ENSG00000118271)	0.5	-2	-3	-3	-3	-3	-3	-3	-3
DEFB126	DEFB126 (ENSG00000125788)	0.5	-3	-3	-3	0.26	-3	-3	-3	-3
CYP4F8	CYP4F8 (ENSG00000186526)	0.5	-3	-3	-0.84	-3	-3	-3	-3	-3
ALDOB	ALDOB (ENSG00000136872)	0.5	-2.84	-3	-3	-3	-3	-3	-3	-3
DEFB109P1	DEFB109P1 (ENSG00000242296)	0.5	-3	-3	-3	-0.23	-3	-3	-3	-3
NDUFB4P1	NDUFB4P1 (ENSG00000242510)	0.5	-1.15	-3	-3	-3	-3	-3	-3	-3
RPS3AP43	RPS3AP43 (ENSG00000242661)	0.5	-3	-3	-2.32	-3	-3	-3	-3	-3
STAB1	STAB1 (ENSG00000010327)	0.5	-3	-3	-3	-2.47	-3	-3	-3	-3
IPO7P1	IPO7P1 (ENSG00000232951)	0.5	-2.25	-3	-3	-3	-3	-3	-3	-3
CHRM4	CHRM4 (ENSG00000180720)	0.5	-3	-3	-1.25	-3	-3	-3	-3	-3
RN7SL806P	RN7SL806P (ENSG00000242719)	0.5	-3	-3	-0.76	-3	-3	-3	-3	-3
MAB21L1	MAB21L1 (ENSG00000180660)	0.5	-2.56	-3	-3	-3	-3	-3	-3	-3
C11orf71	C11orf71 (ENSG00000180425)	0.5	-3	-3	-2	-3	-3	-3	-3	-3
HSPE1P6	HSPE1P6 (ENSG00000232917)	0.5	-3	-3	-0.64	-3	-3	-3	-3	-3
FSD2	FSD2 (ENSG00000186628)	0.5	-3	-3	-3	-2.12	-3	-3	-3	-3
HIST2H2AB	HIST2H2AB (ENSG00000184270)	0.5	-3	-2.94	-3	-3	-3	-3	-3	-3
SEC1P	SEC1P (ENSG00000232871)	0.5	-3	-3	-0.42	-3	-3	-3	-3	-3
TPT1P10	TPT1P10 (ENSG00000180221)	0.5	-3	-2.25	-3	-3	-3	-3	-3	-3
SNX18P2	SNX18P2 (ENSG00000232843)	0.5	-3	-3	-2.84	-3	-3	-3	-3	-3
SLCO2B1	SLCO2B1 (ENSG00000137491)	0.5	-3	-3	-2.74	-3	-3	-3	-3	-3
SLCO4A1-AS1	SLCO4A1-AS1 (ENSG00000232803)	0.5	-3	-3	-1.12	-3	-3	-3	-3	-3
SDCBPP3	SDCBPP3 (ENSG00000232801)	0.5	-2.32	-3	-3	-3	-3	-3	-3	-3
POU2F3	POU2F3 (ENSG00000137709)	0.5	-3	-3	-2.84	-3	-3	-3	-3	-3
SCAND3P1	SCAND3P1 (ENSG00000232795)	0.5	-3	-3	-3	-2.84	-3	-3	-3	-3
OR10H1	OR10H1 (ENSG00000186723)	0.5	-3	-3	-2.25	-3	-3	-3	-3	-3
COL21A1	COL21A1 (ENSG00000124749)	0.5	-3	-2.56	-3	-3	-3	-3	-3	-3
RN7SL449P	RN7SL449P (ENSG00000242889)	0.5	-0.89	-3	-3	-3	-3	-3	-3	-3
LINC00844	LINC00844 (ENSG00000237949)	0.5	-3	-3	-1.51	-3	-3	-3	-3	-3
HNRNPDP1	HNRNPDP1 (ENSG00000232794)	0.5	-3	-3	-3	-2.74	-3	-3	-3	-3
SPTLC1P4	SPTLC1P4 (ENSG00000232678)	0.5	-3	-3	-3	-0.14	-3	-3	-3	-3
EPS15P1	EPS15P1 (ENSG00000242948)	0.5	-3	-3	-2.84	-3	-3	-3	-3	-3
TDRD6	TDRD6 (ENSG00000180113)	0.5	-3	-3	-2.84	-3	-3	-3	-3	-3
ST3GAL5-AS1	ST3GAL5-AS1 (ENSG00000232504)	0.5	-3	-2.47	-3	-3	-3	-3	-3	-3
TDGF1P7	TDGF1P7 (ENSG00000269584)	0.5	-3	-3	-2	-3	-3	-3	-3	-3
GNMT	GNMT (ENSG00000124713)	0.5	-3	-3	-3	-2.94	-3	-3	-3	-3
C9orf172	C9orf172 (ENSG00000232434)	0.5	-3	-3	-2.74	-3	-3	-3	-3	-3
CLIC4P3	CLIC4P3 (ENSG00000237931)	0.5	-3	-2.74	-3	-3	-3	-3	-3	-3
RPL23AP32	RPL23AP32 (ENSG00000237887)	0.5	-3	-3	-2.4	-3	-3	-3	-3	-3
KYNU	KYNU (ENSG00000115919)	0.5	-3	-2.94	-3	-3	-3	-3	-3	-3
GXYLT1P3	GXYLT1P3 (ENSG00000232433)	0.5	-3	-2.94	-3	-3	-3	-3	-3	-3
PTMAP8	PTMAP8 (ENSG00000243014)	0.5	-3	-1.89	-3	-3	-3	-3	-3	-3
MSTN	MSTN (ENSG00000138379)	0.5	-3	-3	-1.89	-3	-3	-3	-3	-3
RPL21P131	RPL21P131 (ENSG00000232429)	0.5	-3	-3	-2.56	-3	-3	-3	-3	-3
IL1RL2	IL1RL2 (ENSG00000115598)	0.5	-3	-3	-3	-2.47	-3	-3	-3	-3
RN7SL635P	RN7SL635P (ENSG00000243029)	0.5	-3	-3	-3	-0.74	-3	-3	-3	-3
C1QL4	C1QL4 (ENSG00000186897)	0.5	-2.18	-3	-3	-3	-3	-3	-3	-3
TLX2	TLX2 (ENSG00000115297)	0.5	-3	-3	-2.18	-3	-3	-3	-3	-3
RPL23AP55	RPL23AP55 (ENSG00000243265)	0.5	-3	-3	-3	-2.4	-3	-3	-3	-3
RPL31P61	RPL31P61 (ENSG00000243297)	0.5	-2.12	-3	-3	-3	-3	-3	-3	-3
PPIAP13	PPIAP13 (ENSG00000237882)	0.5	-3	-3	-3	-2.56	-3	-3	-3	-3
CCK	CCK (ENSG00000187094)	0.5	-2.64	-3	-3	-3	-3	-3	-3	-3
LYPLA2P2	LYPLA2P2 (ENSG00000269153)	0.5	-3	-3	-2.47	-3	-3	-3	-3	-3
P4HA2-AS1	P4HA2-AS1 (ENSG00000237714)	0.5	-3	-3	-2	-3	-3	-3	-3	-3
RPL32P28	RPL32P28 (ENSG00000232105)	0.5	-3	-3	-3	-1.94	-3	-3	-3	-3
RPRML	RPRML (ENSG00000179673)	0.5	-3	-3	-3	-2.94	-3	-3	-3	-3
NPM1P29	NPM1P29 (ENSG00000239351)	0.5	-3	-2.94	-3	-3	-3	-3	-3	-3
GRM8	GRM8 (ENSG00000179603)	0.5	-3	-2.94	-3	-3	-3	-3	-3	-3
FAM90A28P	FAM90A28P (ENSG00000269118)	0.5	-3	-3	-2.64	-3	-3	-3	-3	-3
PPP1R2P3	PPP1R2P3 (ENSG00000231989)	0.5	-3	-3	-3	-2.25	-3	-3	-3	-3
MROH7	MROH7 (ENSG00000184313)	0.5	-3	-3	-2.74	-3	-3	-3	-3	-3
BNIP3P26	BNIP3P26 (ENSG00000268705)	0.5	-3	-3	-3	-2.94	-3	-3	-3	-3
DPY19L1P2	DPY19L1P2 (ENSG00000231952)	0.5	-3	-2.74	-3	-3	-3	-3	-3	-3
RNF151	RNF151 (ENSG00000179580)	0.5	-3	-2.84	-3	-3	-3	-3	-3	-3
CYP21A2	CYP21A2 (ENSG00000231852)	0.5	-3	-3	-2.32	-3	-3	-3	-3	-3
LHFPL3	LHFPL3 (ENSG00000187416)	0.5	-3	-3	-0.64	-3	-3	-3	-3	-3
RPL31P50	RPL31P50 (ENSG00000231788)	0.5	-0.97	-3	-3	-3	-3	-3	-3	-3
AOX2P	AOX2P (ENSG00000243478)	0.5	-3	-3	-2.32	-3	-3	-3	-3	-3
GAPDHP59	GAPDHP59 (ENSG00000231739)	0.5	-3	-0.74	-3	-3	-3	-3	-3	-3
TMEM132B	TMEM132B (ENSG00000139364)	0.5	-3	-2.18	-3	-3	-3	-3	-3	-3
TSPAN19	TSPAN19 (ENSG00000231738)	0.5	-3	-2.84	-3	-3	-3	-3	-3	-3
PABPC1P1	PABPC1P1 (ENSG00000231707)	0.5	-3	-3	-3	-2.18	-3	-3	-3	-3
POLR3GP1	POLR3GP1 (ENSG00000268295)	0.5	-0.29	-3	-3	-3	-3	-3	-3	-3
GMFBP1	GMFBP1 (ENSG00000243495)	0.5	-3	-2.74	-3	-3	-3	-3	-3	-3
RSL24D1P3	RSL24D1P3 (ENSG00000231556)	0.5	-3	-3	-2.64	-3	-3	-3	-3	-3
USMG5P1	USMG5P1 (ENSG00000231549)	0.5	2.33	-3	-3	-3	-3	-3	-3	-3
HLA-DQB1	HLA-DQB1 (ENSG00000179344)	0.5	-3	-2.74	-3	-3	-3	-3	-3	-3
LINC00317	LINC00317 (ENSG00000238265)	0.5	-3	-2.84	-3	-3	-3	-3	-3	-3
TMEM151A	TMEM151A (ENSG00000179292)	0.5	-3	-3	-1.47	-3	-3	-3	-3	-3
GCSHP3	GCSHP3 (ENSG00000237580)	0.5	-3	-3	-3	-1.4	-3	-3	-3	-3
LINC01516	LINC01516 (ENSG00000231422)	0.5	-3	-2.94	-3	-3	-3	-3	-3	-3
SLC24A4	SLC24A4 (ENSG00000140090)	0.5	-3	-3	-3	-0.34	-3	-3	-3	-3
RPS23P1	RPS23P1 (ENSG00000243504)	0.5	-3	-3	-2.18	-3	-3	-3	-3	-3
C17orf105	C17orf105 (ENSG00000231256)	0.5	-3	-3	-2.94	-3	-3	-3	-3	-3
DPEP1	DPEP1 (ENSG00000015413)	0.5	-3	-3	-2.64	-3	-3	-3	-3	-3
ERC2	ERC2 (ENSG00000187672)	0.5	-3	-3	-3	0.06	-3	-3	-3	-3
HRH2	HRH2 (ENSG00000113749)	0.5	-3	-3	-1.56	-3	-3	-3	-3	-3
KRT8P10	KRT8P10 (ENSG00000231203)	0.5	-3	-3	-1.89	-3	-3	-3	-3	-3
RHCG	RHCG (ENSG00000140519)	0.5	-3	-3	-2.56	-3	-3	-3	-3	-3
RN7SL838P	RN7SL838P (ENSG00000243562)	0.5	-3	-3	0.4	-3	-3	-3	-3	-3
COX11P1	COX11P1 (ENSG00000231162)	0.5	-3	-3	-1.74	-3	-3	-3	-3	-3
LEFTY1	LEFTY1 (ENSG00000243709)	0.5	-3	-3	-2.94	-3	-3	-3	-3	-3
PTP4A1P1	PTP4A1P1 (ENSG00000231158)	0.5	-3	-3	-2.74	-3	-3	-3	-3	-3
MYLK3	MYLK3 (ENSG00000140795)	0.5	-3	-3	-2.84	-3	-3	-3	-3	-3
BTNL8	BTNL8 (ENSG00000113303)	0.5	-2.18	-3	-3	-3	-3	-3	-3	-3
TSSK1A	TSSK1A (ENSG00000231086)	0.5	-3	-3	-3	-2.84	-3	-3	-3	-3
PXT1	PXT1 (ENSG00000179165)	0.5	-3	-3	-2.84	-3	-3	-3	-3	-3
PCDHB3	PCDHB3 (ENSG00000113205)	0.5	-3	-3	-2.84	-3	-3	-3	-3	-3
PEX5L-AS1	PEX5L-AS1 (ENSG00000243799)	0.5	-3	-2.94	-3	-3	-3	-3	-3	-3
PKN2-AS1	PKN2-AS1 (ENSG00000237505)	0.5	-3	-3	-2.74	-3	-3	-3	-3	-3
ERAS	ERAS (ENSG00000187682)	0.5	-3	-3	-1.32	-3	-3	-3	-3	-3
EXOC3L1	EXOC3L1 (ENSG00000179044)	0.5	-3	-3	-1	-3	-3	-3	-3	-3
MEP1B	MEP1B (ENSG00000141434)	0.5	-3	-3	-3	-2.56	-3	-3	-3	-3
RN7SL236P	RN7SL236P (ENSG00000243870)	0.5	-3	-3	-3	-0.54	-3	-3	-3	-3
MAGEA8-AS1	MAGEA8-AS1 (ENSG00000230899)	0.5	-3	-2.12	-3	-3	-3	-3	-3	-3
CYP4F62P	CYP4F62P (ENSG00000239402)	0.5	-3	-3	-2.84	-3	-3	-3	-3	-3
RN7SL487P	RN7SL487P (ENSG00000243871)	0.5	-3	-3	-3	-0.71	-3	-3	-3	-3
WISP3	WISP3 (ENSG00000112761)	0.5	-3	-2.74	-3	-3	-3	-3	-3	-3
CEACAMP4	CEACAMP4 (ENSG00000230681)	0.5	-2.56	-3	-3	-3	-3	-3	-3	-3
TPGS1	TPGS1 (ENSG00000141933)	0.5	-3	-3	-2.32	-3	-3	-3	-3	-3
RPSAP8	RPSAP8 (ENSG00000230592)	0.5	-2.32	-3	-3	-3	-3	-3	-3	-3
ZNF861P	ZNF861P (ENSG00000267235)	0.5	-3	-3	-2.32	-3	-3	-3	-3	-3
NTN5	NTN5 (ENSG00000142233)	0.5	-3	-3	-1.74	-3	-3	-3	-3	-3
ADAMTS10	ADAMTS10 (ENSG00000142303)	0.5	-3	-3	-2.94	-3	-3	-3	-3	-3
SLC47A1	SLC47A1 (ENSG00000142494)	0.5	-0.76	-3	-3	-3	-3	-3	-3	-3
IGLON5	IGLON5 (ENSG00000142549)	0.5	-3	-3	-2.18	-3	-3	-3	-3	-3
GABRD	GABRD (ENSG00000187730)	0.5	-3	-3	-0.81	-3	-3	-3	-3	-3
GRAMD1B	GRAMD1B (ENSG00000023171)	0.5	-3	-3	-2.74	-3	-3	-3	-3	-3
CFAP74	CFAP74 (ENSG00000142609)	0.5	-3	-3	-0.64	-3	-3	-3	-3	-3
RN7SL402P	RN7SL402P (ENSG00000243968)	0.5	-3	-3	-3	-0.17	-3	-3	-3	-3
NOS2P3	NOS2P3 (ENSG00000230528)	0.5	-3	-3	-2.64	-3	-3	-3	-3	-3
RN7SL523P	RN7SL523P (ENSG00000243976)	0.5	-3	-3	-3	-0.84	-3	-3	-3	-3
MSC	MSC (ENSG00000178860)	0.5	-1.12	-3	-3	-3	-3	-3	-3	-3
RPL5P24	RPL5P24 (ENSG00000244052)	0.5	-3	-3	-2.06	-3	-3	-3	-3	-3
XCL1	XCL1 (ENSG00000143184)	0.5	-3	-3	-2.94	-3	-3	-3	-3	-3
RPL19P21	RPL19P21 (ENSG00000230508)	0.5	-3	-3	-3	-2.18	-3	-3	-3	-3
NEK2P4	NEK2P4 (ENSG00000230450)	0.5	-3	-3	-2.84	-3	-3	-3	-3	-3
UNC93A	UNC93A (ENSG00000112494)	0.5	-3	-3	-2.47	-3	-3	-3	-3	-3
LINC00856	LINC00856 (ENSG00000230417)	0.5	-3	-3	-2.25	-3	-3	-3	-3	-3
CCR6	CCR6 (ENSG00000112486)	0.5	-3	-3	-2.84	-3	-3	-3	-3	-3
LINC01351	LINC01351 (ENSG00000237457)	0.5	-1.29	-3	-3	-3	-3	-3	-3	-3
WDR7-OT1	WDR7-OT1 (ENSG00000267225)	0.5	-3	-2.94	-3	-3	-3	-3	-3	-3
RIIAD1	RIIAD1 (ENSG00000178796)	0.5	-3	-3	-2.56	-3	-3	-3	-3	-3
LINC01284	LINC01284 (ENSG00000230317)	0.5	-3	-3	-3	-2.64	-3	-3	-3	-3
CICP6	CICP6 (ENSG00000230304)	0.5	-3	-3	-2.84	-3	-3	-3	-3	-3
STARD13-IT1	STARD13-IT1 (ENSG00000230300)	0.5	-3	-2.94	-3	-3	-3	-3	-3	-3
NHS-AS1	NHS-AS1 (ENSG00000230020)	0.5	-3	-3	-0.04	-3	-3	-3	-3	-3
GDPD4	GDPD4 (ENSG00000178795)	0.5	-3	-3	-3	-1.84	-3	-3	-3	-3
TBC1D29	TBC1D29 (ENSG00000266733)	0.5	-3	-3	-2.94	-3	-3	-3	-3	-3
KIF25-AS1	KIF25-AS1 (ENSG00000229921)	0.5	-3	-2.84	-3	-3	-3	-3	-3	-3
TCEB1P3	TCEB1P3 (ENSG00000229919)	0.5	-3	-3	-3	-1.32	-3	-3	-3	-3
RN7SL833P	RN7SL833P (ENSG00000244080)	0.5	-3	-3	-3	-0.62	-3	-3	-3	-3
SLC18A1	SLC18A1 (ENSG00000036565)	0.5	-3	-3	-3	-2.64	-3	-3	-3	-3
HSPD1P21	HSPD1P21 (ENSG00000229900)	0.5	-3	-3	-3	0.19	-3	-3	-3	-3
UBE2Q1-AS1	UBE2Q1-AS1 (ENSG00000229780)	0.5	-2.64	-3	-3	-3	-3	-3	-3	-3
RNFT1P3	RNFT1P3 (ENSG00000187870)	0.5	-3	-3	-3	-2.84	-3	-3	-3	-3
RAB42	RAB42 (ENSG00000188060)	0.5	-3	-3	-1.15	-3	-3	-3	-3	-3
EEF1DP3	EEF1DP3 (ENSG00000229715)	0.5	-3	-3	-3	-2.84	-3	-3	-3	-3
FLT4	FLT4 (ENSG00000037280)	0.5	-3	-3	-3	-1.69	-3	-3	-3	-3
SLC38A3	SLC38A3 (ENSG00000188338)	0.5	-3	-2.74	-3	-3	-3	-3	-3	-3
ESPNL	ESPNL (ENSG00000144488)	0.5	-3	-3	-2.56	-3	-3	-3	-3	-3
NANOG	NANOG (ENSG00000111704)	0.5	-3	-3	-2.94	-3	-3	-3	-3	-3
SLC22A14	SLC22A14 (ENSG00000144671)	0.5	-3	-3	-2.94	-3	-3	-3	-3	-3
IZUMO1R	IZUMO1R (ENSG00000183560)	0.5	-3	-3	-3	-2.74	-3	-3	-3	-3
MSX2P1	MSX2P1 (ENSG00000229590)	0.5	-3	-3	-3	-2.84	-3	-3	-3	-3
NR1I2	NR1I2 (ENSG00000144852)	0.5	-3	-3	-2.74	-3	-3	-3	-3	-3
IGKV2-28	IGKV2-28 (ENSG00000244116)	0.5	-2.25	-3	-3	-3	-3	-3	-3	-3
RPSAP51	RPSAP51 (ENSG00000244131)	0.5	-3	-3	-3	-1.79	-3	-3	-3	-3
ALDH1L1	ALDH1L1 (ENSG00000144908)	0.5	-3	-3	-2.84	-3	-3	-3	-3	-3
BHMG1	BHMG1 (ENSG00000237452)	0.5	-3	-3	-2.56	-3	-3	-3	-3	-3
RPL21P44	RPL21P44 (ENSG00000229585)	0.5	-3	-3	-3	-1.51	-3	-3	-3	-3
TAS2R3	TAS2R3 (ENSG00000127362)	0.5	-3	-2.84	-3	-3	-3	-3	-3	-3
CHCHD4P2	CHCHD4P2 (ENSG00000237360)	0.5	-3	-2.74	-3	-3	-3	-3	-3	-3
TSPAN11	TSPAN11 (ENSG00000110900)	0.5	-3	-3	-2.94	-3	-3	-3	-3	-3
GC	GC (ENSG00000145321)	0.5	-2.64	-3	-3	-3	-3	-3	-3	-3
LY6G6D	LY6G6D (ENSG00000244355)	0.5	-3	-3	-1.94	-3	-3	-3	-3	-3
BEST2	BEST2 (ENSG00000039987)	0.5	-3	-3	-3	-2.84	-3	-3	-3	-3
HMGN1P37	HMGN1P37 (ENSG00000229237)	0.5	-1.09	-3	-3	-3	-3	-3	-3	-3
RN7SL145P	RN7SL145P (ENSG00000244357)	0.5	-3	-1.22	-3	-3	-3	-3	-3	-3
MED4-AS1	MED4-AS1 (ENSG00000229111)	0.5	-3	-3	-2.84	-3	-3	-3	-3	-3
CDH10	CDH10 (ENSG00000040731)	0.5	-3	-3	-3	-2.74	-3	-3	-3	-3
LILRA6	LILRA6 (ENSG00000244482)	0.5	-3	-3	-2.56	-3	-3	-3	-3	-3
SCGB2A2	SCGB2A2 (ENSG00000110484)	0.5	-3	-3	-1.69	-3	-3	-3	-3	-3
NRXN2	NRXN2 (ENSG00000110076)	0.5	-3	-3	-1.84	-3	-3	-3	-3	-3
HOMER2P1	HOMER2P1 (ENSG00000228966)	0.5	-3	-3	-3	-2.74	-3	-3	-3	-3
IGKV1-27	IGKV1-27 (ENSG00000244575)	0.5	-3	-2.32	-3	-3	-3	-3	-3	-3
MTHFD2P1	MTHFD2P1 (ENSG00000244681)	0.5	-3	-3	-3	-2.47	-3	-3	-3	-3
BHMT	BHMT (ENSG00000145692)	0.5	-2.56	-3	-3	-3	-3	-3	-3	-3
CC2D2B	CC2D2B (ENSG00000188649)	0.5	-3	-3	-3	-2.94	-3	-3	-3	-3
MYOZ1	MYOZ1 (ENSG00000177791)	0.5	-3	-2.94	-3	-3	-3	-3	-3	-3
FAM87B	FAM87B (ENSG00000177757)	0.5	-2.64	-3	-3	-3	-3	-3	-3	-3
CT45A5	CT45A5 (ENSG00000228836)	0.5	-3	-3	-3	-2.94	-3	-3	-3	-3
RN7SL543P	RN7SL543P (ENSG00000265918)	0.5	-3	-1.29	-3	-3	-3	-3	-3	-3
RPL7L1P8	RPL7L1P8 (ENSG00000228766)	0.5	-3	-3	-3	-2.12	-3	-3	-3	-3
UCP1	UCP1 (ENSG00000109424)	0.5	-3	-3	-3	-2.74	-3	-3	-3	-3
LIMS1-AS1	LIMS1-AS1 (ENSG00000228763)	0.5	-3	-3	-3	-2.56	-3	-3	-3	-3
PSD2	PSD2 (ENSG00000146005)	0.5	-3	-3	-2.25	-3	-3	-3	-3	-3
RN7SL300P	RN7SL300P (ENSG00000265813)	0.5	-3	-3	-1.03	-3	-3	-3	-3	-3
DAAM2	DAAM2 (ENSG00000146122)	0.5	-2.32	-3	-3	-3	-3	-3	-3	-3
FGD2	FGD2 (ENSG00000146192)	0.5	-3	-2.06	-3	-3	-3	-3	-3	-3
CELSR3-AS1	CELSR3-AS1 (ENSG00000228350)	0.5	-3	-3	-3	1.59	-3	-3	-3	-3
MBOAT4	MBOAT4 (ENSG00000177669)	0.5	-3	-3	-2.56	-3	-3	-3	-3	-3
TMCO2	TMCO2 (ENSG00000188800)	0.5	-3	-3	-3	-2.94	-3	-3	-3	-3
CKMT1B	CKMT1B (ENSG00000237289)	0.5	-0.34	-3	-3	-3	-3	-3	-3	-3
TXNP5	TXNP5 (ENSG00000228236)	0.5	-3	-1.56	-3	-3	-3	-3	-3	-3
RN7SL648P	RN7SL648P (ENSG00000265727)	0.5	-3	-3	-0.67	-3	-3	-3	-3	-3
FAM20A	FAM20A (ENSG00000108950)	0.5	-3	-3	-3	-2.32	-3	-3	-3	-3
PPY	PPY (ENSG00000108849)	0.5	-3	-3	-2.64	-3	-3	-3	-3	-3
DPPA3P2	DPPA3P2 (ENSG00000188831)	0.5	-3	-3	-3	-2.56	-3	-3	-3	-3
AWAT2	AWAT2 (ENSG00000147160)	0.5	-3	-2.06	-3	-3	-3	-3	-3	-3
LINC00693	LINC00693 (ENSG00000228214)	0.5	-2.64	-3	-3	-3	-3	-3	-3	-3
ENTPD8	ENTPD8 (ENSG00000188833)	0.5	-3	-3	-3	-2.4	-3	-3	-3	-3
CHRNB3	CHRNB3 (ENSG00000147432)	0.5	-3	-3	-2.84	-3	-3	-3	-3	-3
HSD17B1P1	HSD17B1P1 (ENSG00000108785)	0.5	-3	-3	-2.25	-3	-3	-3	-3	-3
RPRM	RPRM (ENSG00000177519)	0.5	-3	-3	-3	-2.74	-3	-3	-3	-3
PCED1B-AS1	PCED1B-AS1 (ENSG00000247774)	0.5	-3	-2.32	-3	-3	-3	-3	-3	-3
PHBP3	PHBP3 (ENSG00000228121)	0.5	-3	-3	-3	-2.94	-3	-3	-3	-3
CCL2	CCL2 (ENSG00000108691)	0.5	-2.25	-3	-3	-3	-3	-3	-3	-3
SPCS2P3	SPCS2P3 (ENSG00000247872)	0.5	-3	-3	-1.4	-3	-3	-3	-3	-3
RSL24D1P8	RSL24D1P8 (ENSG00000237273)	0.5	-3	-3	-3	-2.64	-3	-3	-3	-3
RPSAP47	RPSAP47 (ENSG00000188856)	0.5	-2.64	-3	-3	-3	-3	-3	-3	-3
MTND6P8	MTND6P8 (ENSG00000248136)	0.5	-3	-3	-2.84	-3	-3	-3	-3	-3
OCIAD1-AS1	OCIAD1-AS1 (ENSG00000248256)	0.5	-3	-3	-0.81	-3	-3	-3	-3	-3
WDR45BP1	WDR45BP1 (ENSG00000265574)	0.5	-2.94	-3	-3	-3	-3	-3	-3	-3
KRT23	KRT23 (ENSG00000108244)	0.5	-3	-3	-3	-2.74	-3	-3	-3	-3
MTND5P1	MTND5P1 (ENSG00000227999)	0.5	-3	-3	-1.6	-3	-3	-3	-3	-3
LGI1	LGI1 (ENSG00000108231)	0.5	-3	-3	-3	-2.18	-3	-3	-3	-3
HS3ST3B1	HS3ST3B1 (ENSG00000125430)	0.5	-3	-3	-0.86	-3	-3	-3	-3	-3
FGF8	FGF8 (ENSG00000107831)	0.5	-3	-2.84	-3	-3	-3	-3	-3	-3
PKD2L1	PKD2L1 (ENSG00000107593)	0.5	-3	-3	-3	-2.06	-3	-3	-3	-3
ARHGAP22-IT1	ARHGAP22-IT1 (ENSG00000248682)	0.5	-2.94	-3	-3	-3	-3	-3	-3	-3
UTS2B	UTS2B (ENSG00000188958)	0.5	-3	-3	-3	-2.18	-3	-3	-3	-3
MYL12BP2	MYL12BP2 (ENSG00000227765)	0.5	-3	-3	-2.74	-3	-3	-3	-3	-3
EIF4A2P2	EIF4A2P2 (ENSG00000227382)	0.5	-3	-3	-2.84	-3	-3	-3	-3	-3
SCN2B	SCN2B (ENSG00000149575)	0.5	-3	-3	-2.94	-3	-3	-3	-3	-3
PPIAP2	PPIAP2 (ENSG00000227379)	0.5	-3	-3	-3	-2.64	-3	-3	-3	-3
LINC00866	LINC00866 (ENSG00000227356)	0.5	-3	-3	-2.12	-3	-3	-3	-3	-3
SULT1C2P1	SULT1C2P1 (ENSG00000237223)	0.5	-3	-3	-2.47	-3	-3	-3	-3	-3
NPHP3-AS1	NPHP3-AS1 (ENSG00000248724)	0.5	-3	-3	-2.84	-3	-3	-3	-3	-3
IMPDH1P4	IMPDH1P4 (ENSG00000237206)	0.5	-3	-3	-3	-2	-3	-3	-3	-3
LINC01203	LINC01203 (ENSG00000226985)	0.5	-3	-3	-3	-2.56	-3	-3	-3	-3
HMGN1P24	HMGN1P24 (ENSG00000226977)	0.5	-1	-3	-3	-3	-3	-3	-3	-3
CEP164P1	CEP164P1 (ENSG00000226937)	0.5	-3	-2.94	-3	-3	-3	-3	-3	-3
LHFPL3-AS1	LHFPL3-AS1 (ENSG00000226869)	0.5	-3	-3	-2.25	-3	-3	-3	-3	-3
KCNH2	KCNH2 (ENSG00000055118)	0.5	-3	-3	-2.4	-3	-3	-3	-3	-3
MED15P8	MED15P8 (ENSG00000248796)	0.5	-3	-3	-2.94	-3	-3	-3	-3	-3
IFNA20P	IFNA20P (ENSG00000226393)	0.5	-3	-3	-1.84	-3	-3	-3	-3	-3
SERBP1P6	SERBP1P6 (ENSG00000248873)	0.5	-3	-3	-2.4	-3	-3	-3	-3	-3
MSANTD1	MSANTD1 (ENSG00000188981)	0.5	-3	-3	-2.74	-3	-3	-3	-3	-3
VN2R10P	VN2R10P (ENSG00000226348)	0.5	-3	-3	-2	-3	-3	-3	-3	-3
VHLL	VHLL (ENSG00000189030)	0.5	-3	-3	-2.32	-3	-3	-3	-3	-3
LINC00351	LINC00351 (ENSG00000226317)	0.5	-3	-3	-1.84	-3	-3	-3	-3	-3
PSPHP1	PSPHP1 (ENSG00000226278)	0.5	-3	-3	-3	-0.15	-3	-3	-3	-3
RN7SL246P	RN7SL246P (ENSG00000265093)	0.5	-3	-1.32	-3	-3	-3	-3	-3	-3
SUPT4H1P	SUPT4H1P (ENSG00000226247)	0.5	-3	-3	-3	-1.36	-3	-3	-3	-3
SPDEF	SPDEF (ENSG00000124664)	0.5	-3	-3	-2.64	-3	-3	-3	-3	-3
LAMTOR3P2	LAMTOR3P2 (ENSG00000248979)	0.5	-3	0.03	-3	-3	-3	-3	-3	-3
ALG1L	ALG1L (ENSG00000189366)	0.5	-3	-3	-2.12	-3	-3	-3	-3	-3
SLMO2P1	SLMO2P1 (ENSG00000226226)	0.5	-3	-3	-2.94	-3	-3	-3	-3	-3
RN7SL262P	RN7SL262P (ENSG00000265033)	0.5	-3	-3	-0.67	-3	-3	-3	-3	-3
FAM138D	FAM138D (ENSG00000249054)	0.5	-3	-2.84	-3	-3	-3	-3	-3	-3
KRT18P25	KRT18P25 (ENSG00000249064)	0.5	-3	-3	-3	-2.84	-3	-3	-3	-3
DPYSL4	DPYSL4 (ENSG00000151640)	0.5	-3	-3	-0.42	-3	-3	-3	-3	-3
HSPD1P5	HSPD1P5 (ENSG00000249193)	0.5	-2.64	-3	-3	-3	-3	-3	-3	-3
GAPDHP38	GAPDHP38 (ENSG00000249210)	0.5	-3	-3	-2.74	-3	-3	-3	-3	-3
LRRTM4	LRRTM4 (ENSG00000176204)	0.5	-3	-3	-2.64	-3	-3	-3	-3	-3
ZNF503-AS1	ZNF503-AS1 (ENSG00000226051)	0.5	-3	-3	-0.03	-3	-3	-3	-3	-3
GTF2IP14	GTF2IP14 (ENSG00000226002)	0.5	-2.64	-3	-3	-3	-3	-3	-3	-3
RN7SL45P	RN7SL45P (ENSG00000264862)	0.5	-3	-3	-0.74	-3	-3	-3	-3	-3
SPATA41	SPATA41 (ENSG00000189419)	0.5	-3	-3	-3	-2.4	-3	-3	-3	-3
CRHR2	CRHR2 (ENSG00000106113)	0.5	-3	-3	-2.84	-3	-3	-3	-3	-3
CEND1	CEND1 (ENSG00000184524)	0.5	-3	-3	-3	-2.94	-3	-3	-3	-3
CASC16	CASC16 (ENSG00000249231)	0.5	-3	-3	-2.25	-3	-3	-3	-3	-3
LINC01411	LINC01411 (ENSG00000249306)	0.5	-3	-3	-3	-1.89	-3	-3	-3	-3
COX5BP6	COX5BP6 (ENSG00000237082)	0.5	1.05	-3	-3	-3	-3	-3	-3	-3
OR7E19P	OR7E19P (ENSG00000225980)	0.5	-3	-3	-2.47	-3	-3	-3	-3	-3
NCR1	NCR1 (ENSG00000189430)	0.5	-3	-3	-2.94	-3	-3	-3	-3	-3
SPARCL1	SPARCL1 (ENSG00000152583)	0.5	-3	-3	-2.94	-3	-3	-3	-3	-3
RPS17P5	RPS17P5 (ENSG00000060303)	0.5	-3	-3	-2	-3	-3	-3	-3	-3
DDX4	DDX4 (ENSG00000152670)	0.5	-3	-3	-2.94	-3	-3	-3	-3	-3
C5orf67	C5orf67 (ENSG00000225940)	0.5	-3	-3	-2.18	-3	-3	-3	-3	-3
MYBPC1	MYBPC1 (ENSG00000196091)	0.5	-3	-2	-3	-3	-3	-3	-3	-3
RNF103-CHMP3	RNF103-CHMP3 (ENSG00000249884)	0.5	-2.84	-3	-3	-3	-3	-3	-3	-3
FDPSP1	FDPSP1 (ENSG00000225462)	0.5	-3	-3	-3	-2.4	-3	-3	-3	-3
PRIMA1	PRIMA1 (ENSG00000175785)	0.5	-3	-3	-2.94	-3	-3	-3	-3	-3
PAX5	PAX5 (ENSG00000196092)	0.5	-3	-3	0.11	-3	-3	-3	-3	-3
LINC01265	LINC01265 (ENSG00000249911)	0.5	-3	-3	-1.84	-3	-3	-3	-3	-3
FAM81B	FAM81B (ENSG00000153347)	0.5	-3	-3	-1.15	-3	-3	-3	-3	-3
CREB3L3	CREB3L3 (ENSG00000060566)	0.5	-3	-3	-2.84	-3	-3	-3	-3	-3
UBQLNL	UBQLNL (ENSG00000175518)	0.5	-3	-2.74	-3	-3	-3	-3	-3	-3
NKG7	NKG7 (ENSG00000105374)	0.5	-2.12	-3	-3	-3	-3	-3	-3	-3
CCDC79	CCDC79 (ENSG00000249961)	0.5	-3	-3	-2.94	-3	-3	-3	-3	-3
LPL	LPL (ENSG00000175445)	0.5	-3	-3	-2.47	-3	-3	-3	-3	-3
RPL21P3	RPL21P3 (ENSG00000225419)	0.5	-2.94	-3	-3	-3	-3	-3	-3	-3
LINC01594	LINC01594 (ENSG00000225328)	0.5	-3	-3	-2.25	-3	-3	-3	-3	-3
CDH12	CDH12 (ENSG00000154162)	0.5	-0.97	-3	-3	-3	-3	-3	-3	-3
MTND4P9	MTND4P9 (ENSG00000250050)	0.5	-3	-3	-2.94	-3	-3	-3	-3	-3
SETP20	SETP20 (ENSG00000225094)	0.5	-3	-3	-2.94	-3	-3	-3	-3	-3
CNTD2	CNTD2 (ENSG00000105219)	0.5	-3	-3	-1.79	-3	-3	-3	-3	-3
SLC1A6	SLC1A6 (ENSG00000105143)	0.5	-3	-3	-2.56	-3	-3	-3	-3	-3
PRRT4	PRRT4 (ENSG00000224940)	0.5	-3	-3	-3	-2.32	-3	-3	-3	-3
RN7SL784P	RN7SL784P (ENSG00000264113)	0.5	-3	-3	-3	-1.15	-3	-3	-3	-3
FAM27C	FAM27C (ENSG00000154537)	0.5	-3	-3	-2.84	-3	-3	-3	-3	-3
LINC00393	LINC00393 (ENSG00000224853)	0.5	-3	-3	-2.56	-3	-3	-3	-3	-3
LYL1	LYL1 (ENSG00000104903)	0.5	-3	-2.32	-3	-3	-3	-3	-3	-3
GAL3ST1	GAL3ST1 (ENSG00000128242)	0.5	-3	-3	-2.47	-3	-3	-3	-3	-3
VWA3A	VWA3A (ENSG00000175267)	0.5	-3	-2.47	-3	-3	-3	-3	-3	-3
CHST1	CHST1 (ENSG00000175264)	0.5	-3	-3	-2.74	-3	-3	-3	-3	-3
PDZD9	PDZD9 (ENSG00000155714)	0.5	-3	-3	-2.47	-3	-3	-3	-3	-3
RN7SL336P	RN7SL336P (ENSG00000264017)	0.5	-3	-3	-3	-0.76	-3	-3	-3	-3
LINC00365	LINC00365 (ENSG00000224511)	0.5	-3	-3	-3	-2.56	-3	-3	-3	-3
RN7SL221P	RN7SL221P (ENSG00000239472)	0.5	-3	-1.06	-3	-3	-3	-3	-3	-3
LINC00614	LINC00614 (ENSG00000236983)	0.5	-3	-3	-2.32	-3	-3	-3	-3	-3
PIGUP1	PIGUP1 (ENSG00000224437)	0.5	-3	-3	-3	-2.74	-3	-3	-3	-3
PCDHA10	PCDHA10 (ENSG00000250120)	0.5	-3	-3	-2.74	-3	-3	-3	-3	-3
BATF	BATF (ENSG00000156127)	0.5	0.04	-3	-3	-3	-3	-3	-3	-3
APOBEC3A	APOBEC3A (ENSG00000128383)	0.5	-3	-3	-1.4	-3	-3	-3	-3	-3
WFDC5	WFDC5 (ENSG00000175121)	0.5	-3	-3	-0.79	-3	-3	-3	-3	-3
RDH10-AS1	RDH10-AS1 (ENSG00000250295)	0.5	-3	-2.74	-3	-3	-3	-3	-3	-3
PPP4R1-AS1	PPP4R1-AS1 (ENSG00000263627)	0.5	-3	-3	-1.74	-3	-3	-3	-3	-3
TULP2	TULP2 (ENSG00000104804)	0.5	-3	-3	-2.64	-3	-3	-3	-3	-3
FGL1	FGL1 (ENSG00000104760)	0.5	-2.84	-3	-3	-3	-3	-3	-3	-3
AMMECR1-IT1	AMMECR1-IT1 (ENSG00000224142)	0.5	-3	-3	-2.94	-3	-3	-3	-3	-3
NODAL	NODAL (ENSG00000156574)	0.5	-3	-3	-2.4	-3	-3	-3	-3	-3
MS4A1	MS4A1 (ENSG00000156738)	0.5	-3	-2.94	-3	-3	-3	-3	-3	-3
ADAM2	ADAM2 (ENSG00000104755)	0.5	-3	-3	-1.22	-3	-3	-3	-3	-3
ZDHHC20-IT1	ZDHHC20-IT1 (ENSG00000236953)	0.5	-2.74	-3	-3	-3	-3	-3	-3	-3
ZNF30-AS1	ZNF30-AS1 (ENSG00000270876)	0.5	-3	-2.94	-3	-3	-3	-3	-3	-3
COX6A2	COX6A2 (ENSG00000156885)	0.5	-3	-2.84	-3	-3	-3	-3	-3	-3
LHFPL4	LHFPL4 (ENSG00000156959)	0.5	-3	-3	-3	-2.56	-3	-3	-3	-3
MPV17L	MPV17L (ENSG00000156968)	0.5	-3	-3	-3	-2.56	-3	-3	-3	-3
RPL23AP86	RPL23AP86 (ENSG00000262959)	0.5	-3	-2.47	-3	-3	-3	-3	-3	-3
UBE2CP3	UBE2CP3 (ENSG00000250384)	0.5	-3	-3	-2.32	-3	-3	-3	-3	-3
ZBTB8OSP1	ZBTB8OSP1 (ENSG00000183432)	0.5	-3	-3	-2.64	-3	-3	-3	-3	-3
PACSIN1	PACSIN1 (ENSG00000124507)	0.5	-3	-3	-3	-2.64	-3	-3	-3	-3
CLEC18C	CLEC18C (ENSG00000157335)	0.5	-3	-3	-2.94	-3	-3	-3	-3	-3
PPM1AP1	PPM1AP1 (ENSG00000250483)	0.5	-3	-2.64	-3	-3	-3	-3	-3	-3
CYCSP40	CYCSP40 (ENSG00000262870)	0.5	-3	-1.22	-3	-3	-3	-3	-3	-3
RPS24P14	RPS24P14 (ENSG00000223688)	0.5	-3	-3	-1.64	-3	-3	-3	-3	-3
CABP1	CABP1 (ENSG00000157782)	0.5	-3	-3	-2.18	-3	-3	-3	-3	-3
NPSR1-AS1	NPSR1-AS1 (ENSG00000197085)	0.5	-3	-3	-1.03	-3	-3	-3	-3	-3
RPL34P26	RPL34P26 (ENSG00000223676)	0.5	-1.84	-3	-3	-3	-3	-3	-3	-3
KRT8P51	KRT8P51 (ENSG00000223657)	0.5	-3	-3	-0.58	-3	-3	-3	-3	-3
NCF1	NCF1 (ENSG00000158517)	0.5	-1.84	-3	-3	-3	-3	-3	-3	-3
SUB1P3	SUB1P3 (ENSG00000261612)	0.5	-3	-1.56	-3	-3	-3	-3	-3	-3
PKD1L1	PKD1L1 (ENSG00000158683)	0.5	-3	-3	-3	-2	-3	-3	-3	-3
DSCR4-IT1	DSCR4-IT1 (ENSG00000223608)	0.5	-3	-2.74	-3	-3	-3	-3	-3	-3
LINC01312	LINC01312 (ENSG00000223586)	0.5	-3	-2.84	-3	-3	-3	-3	-3	-3
CYP4F32P	CYP4F32P (ENSG00000223564)	0.5	-3	-3	-3	-2.74	-3	-3	-3	-3
STK19B	STK19B (ENSG00000250535)	0.5	-3	-3	1.14	-3	-3	-3	-3	-3
MTND5P28	MTND5P28 (ENSG00000223549)	0.5	-3	-3	-2.84	-3	-3	-3	-3	-3
SDK2	SDK2 (ENSG00000069188)	0.5	-3	-3	-2.74	-3	-3	-3	-3	-3
LINC01554	LINC01554 (ENSG00000236882)	0.5	-3	-2.56	-3	-3	-3	-3	-3	-3
EEF1A1P8	EEF1A1P8 (ENSG00000223529)	0.5	-3	-3	-2.94	-3	-3	-3	-3	-3
TPM3P6	TPM3P6 (ENSG00000250731)	0.5	-3	-3	-2.56	-3	-3	-3	-3	-3
TH2LCRR	TH2LCRR (ENSG00000223442)	0.5	-3	-3	-1.79	-3	-3	-3	-3	-3
MTND6P21	MTND6P21 (ENSG00000223431)	0.5	-3	-3	-1.56	-3	-3	-3	-3	-3
RPL7P38	RPL7P38 (ENSG00000239473)	0.5	-3	-3	-2.64	-3	-3	-3	-3	-3
GOLGA6A	GOLGA6A (ENSG00000159289)	0.5	-3	-3	-2.94	-3	-3	-3	-3	-3
RN7SKP259	RN7SKP259 (ENSG00000222998)	0.5	-3	-1.79	-3	-3	-3	-3	-3	-3
SPON2	SPON2 (ENSG00000159674)	0.5	-3	-3	-3	-2.94	-3	-3	-3	-3
RN7SKP51	RN7SKP51 (ENSG00000222713)	0.5	-3	-1.4	-3	-3	-3	-3	-3	-3
RAB6C	RAB6C (ENSG00000222014)	0.5	-3	-3	-2.94	-3	-3	-3	-3	-3
HMSD	HMSD (ENSG00000221887)	0.5	-3	-3	-2.94	-3	-3	-3	-3	-3
SLC25A30-AS1	SLC25A30-AS1 (ENSG00000251015)	0.5	-3	-3	-3	-2.47	-3	-3	-3	-3
SEPT14P4	SEPT14P4 (ENSG00000251155)	0.5	-3	1.44	-3	-3	-3	-3	-3	-3
MIR1307	MIR1307 (ENSG00000221767)	0.5	-3	-3	3.55	-3	-3	-3	-3	-3
LINC00543	LINC00543 (ENSG00000260704)	0.5	-3	-3	-3	-2.84	-3	-3	-3	-3
HULC	HULC (ENSG00000251164)	0.5	-3	-3	-3	-2.94	-3	-3	-3	-3
UCHL1-AS1	UCHL1-AS1 (ENSG00000251173)	0.5	-3	-2.94	-3	-3	-3	-3	-3	-3
FCF1P5	FCF1P5 (ENSG00000220392)	0.5	-3	-3	-2.56	-3	-3	-3	-3	-3
HNRNPH1P1	HNRNPH1P1 (ENSG00000220305)	0.5	-3	-3	-3	-2.12	-3	-3	-3	-3
S100B	S100B (ENSG00000160307)	0.5	-3	-3	-3	-2.47	-3	-3	-3	-3
SNRPCP2	SNRPCP2 (ENSG00000251235)	0.5	-1.94	-3	-3	-3	-3	-3	-3	-3
LINC01541	LINC01541 (ENSG00000260676)	0.5	-3	-3	-2.18	-3	-3	-3	-3	-3
EPHA8	EPHA8 (ENSG00000070886)	0.5	-3	-3	-2.56	-3	-3	-3	-3	-3
CACYBPP3	CACYBPP3 (ENSG00000219188)	0.5	-3	-3	-3	-2.32	-3	-3	-3	-3
DACT3	DACT3 (ENSG00000197380)	0.5	-3	-2.64	-3	-3	-3	-3	-3	-3
CHRNB2	CHRNB2 (ENSG00000160716)	0.5	-3	-3	-1.03	-3	-3	-3	-3	-3
ALG1L2	ALG1L2 (ENSG00000251287)	0.5	-3	-3	-3	-2.47	-3	-3	-3	-3
FTH1P19	FTH1P19 (ENSG00000219186)	0.5	-3	-3	-0.23	-3	-3	-3	-3	-3
RPS3AP2	RPS3AP2 (ENSG00000219027)	0.5	-3	-3	-3	-2.74	-3	-3	-3	-3
FABP12	FABP12 (ENSG00000197416)	0.5	-3	-3	-3	-2.94	-3	-3	-3	-3
HSPD1P16	HSPD1P16 (ENSG00000218792)	0.5	-2.25	-3	-3	-3	-3	-3	-3	-3
XCR1	XCR1 (ENSG00000173578)	0.5	-3	-3	-2.84	-3	-3	-3	-3	-3
PGLYRP2	PGLYRP2 (ENSG00000161031)	0.5	-2.56	-3	-3	-3	-3	-3	-3	-3
RPS3AP41	RPS3AP41 (ENSG00000239481)	0.5	-3	-3	-2.18	-3	-3	-3	-3	-3
HSPE1P8	HSPE1P8 (ENSG00000217897)	0.5	-3	-3	-3	-0.64	-3	-3	-3	-3
NLRP13	NLRP13 (ENSG00000173572)	0.5	-3	-3	-2.84	-3	-3	-3	-3	-3
USP41	USP41 (ENSG00000161133)	0.5	-3	-3	-3	2.71	-3	-3	-3	-3
RAB5CP2	RAB5CP2 (ENSG00000251356)	0.5	-3	-2.94	-3	-3	-3	-3	-3	-3
NPHS1	NPHS1 (ENSG00000161270)	0.5	-3	-3	-2.84	-3	-3	-3	-3	-3
SSXP10	SSXP10 (ENSG00000217330)	0.5	-3	-3	-1.43	-3	-3	-3	-3	-3
RPL21P65	RPL21P65 (ENSG00000216977)	0.5	-3	-2.06	-3	-3	-3	-3	-3	-3
ITFG1-AS1	ITFG1-AS1 (ENSG00000260281)	0.5	-2.84	-3	-3	-3	-3	-3	-3	-3
RPL12P2	RPL12P2 (ENSG00000216412)	0.5	-3	-3	-2.64	-3	-3	-3	-3	-3
HIST1H1PS1	HIST1H1PS1 (ENSG00000216331)	0.5	-3	-3	-3	3.25	-3	-3	-3	-3
CFL1P6	CFL1P6 (ENSG00000215785)	0.5	-3	-3	-2.64	-3	-3	-3	-3	-3
ASNSP4	ASNSP4 (ENSG00000251470)	0.5	-3	-3	-3	-2.32	-3	-3	-3	-3
ABCD2	ABCD2 (ENSG00000173208)	0.5	-3	-2.94	-3	-3	-3	-3	-3	-3
C20orf202	C20orf202 (ENSG00000215595)	0.5	-3	-3	-2.4	-3	-3	-3	-3	-3
MSLNL	MSLNL (ENSG00000162006)	0.5	-3	-3	-1.94	-3	-3	-3	-3	-3
LINC00598	LINC00598 (ENSG00000215483)	0.5	-3	-2.56	-3	-3	-3	-3	-3	-3
MSLN	MSLN (ENSG00000102854)	0.5	-3	-3	-1.32	-3	-3	-3	-3	-3
NPM1P12	NPM1P12 (ENSG00000215311)	0.5	-2.94	-3	-3	-3	-3	-3	-3	-3
PCK1	PCK1 (ENSG00000124253)	0.5	-3	-3	-2.18	-3	-3	-3	-3	-3
BEND5	BEND5 (ENSG00000162373)	0.5	-3	-3	-3	-2.84	-3	-3	-3	-3
SPP2	SPP2 (ENSG00000072080)	0.5	-3	-2.47	-3	-3	-3	-3	-3	-3
OLFM4	OLFM4 (ENSG00000102837)	0.5	-3	-3	-2.25	-3	-3	-3	-3	-3
IMPA1P	IMPA1P (ENSG00000251521)	0.5	-3	-3	-2.94	-3	-3	-3	-3	-3
RNF212B	RNF212B (ENSG00000215277)	0.5	-3	-3	-1.64	-3	-3	-3	-3	-3
YWHAZP6	YWHAZP6 (ENSG00000215199)	0.5	-3	-3	-3	-2.84	-3	-3	-3	-3
LIMS2	LIMS2 (ENSG00000072163)	0.5	-3	-3	-3	-2.12	-3	-3	-3	-3
MUC5AC	MUC5AC (ENSG00000215182)	0.5	-3	-3	-2.47	-3	-3	-3	-3	-3
MATN1	MATN1 (ENSG00000162510)	0.5	-3	-3	-2.84	-3	-3	-3	-3	-3
SETP12	SETP12 (ENSG00000251609)	0.5	-3	-3	-3	-2.94	-3	-3	-3	-3
ALPL	ALPL (ENSG00000162551)	0.5	-3	-3	-3	-2.74	-3	-3	-3	-3
TTLL10	TTLL10 (ENSG00000162571)	0.5	-3	-3	-2	-3	-3	-3	-3	-3
BRCC3P1	BRCC3P1 (ENSG00000251667)	0.5	-3	-2.56	-3	-3	-3	-3	-3	-3
FDPSP5	FDPSP5 (ENSG00000215035)	0.5	-3	-3	-2.84	-3	-3	-3	-3	-3
TAF7L	TAF7L (ENSG00000102387)	0.5	-3	-3	-2.56	-3	-3	-3	-3	-3
RPL24P7	RPL24P7 (ENSG00000215016)	0.5	-3	-2.94	-3	-3	-3	-3	-3	-3
CHCHD2P2	CHCHD2P2 (ENSG00000215006)	0.5	-3	-3	-1.09	-3	-3	-3	-3	-3
RN7SKP18	RN7SKP18 (ENSG00000251814)	0.5	-3	-0.89	-3	-3	-3	-3	-3	-3
HIGD1AP6	HIGD1AP6 (ENSG00000253229)	0.5	-3	-3	-3	-0.49	-3	-3	-3	-3
SRSF9P1	SRSF9P1 (ENSG00000214867)	0.5	-3	-3	-3	-1.89	-3	-3	-3	-3
KRT16P1	KRT16P1 (ENSG00000214856)	0.5	-3	-3	-1.89	-3	-3	-3	-3	-3
MIOXP1	MIOXP1 (ENSG00000253292)	0.5	-3	-3	-3	-2.94	-3	-3	-3	-3
MT2P1	MT2P1 (ENSG00000162840)	0.5	-3	1.56	-3	-3	-3	-3	-3	-3
PAGE4	PAGE4 (ENSG00000101951)	0.5	-3	-2.94	-3	-3	-3	-3	-3	-3
MEG3	MEG3 (ENSG00000214548)	0.5	-3	-3	-3	-2.56	-3	-3	-3	-3
HAAO	HAAO (ENSG00000162882)	0.5	-3	-3	-2.4	-3	-3	-3	-3	-3
MRGPRD	MRGPRD (ENSG00000172938)	0.5	-3	-3	-3	-2.74	-3	-3	-3	-3
PCDHGB6	PCDHGB6 (ENSG00000253305)	0.5	-3	-3	-3	-2.74	-3	-3	-3	-3
PCDHB11	PCDHB11 (ENSG00000197479)	0.5	-3	-3	-2.18	-3	-3	-3	-3	-3
VSNL1	VSNL1 (ENSG00000163032)	0.5	-3	-3	-3	-2.84	-3	-3	-3	-3
TPT1P6	TPT1P6 (ENSG00000214460)	0.5	-3	-2.32	-3	-3	-3	-3	-3	-3
VSIG1	VSIG1 (ENSG00000101842)	0.5	-3	-2.94	-3	-3	-3	-3	-3	-3
RPL18P10	RPL18P10 (ENSG00000214359)	0.5	-3	-3	-2.84	-3	-3	-3	-3	-3
PCAT29	PCAT29 (ENSG00000259641)	0.5	-3	-3	-2.94	-3	-3	-3	-3	-3
ARHGAP25	ARHGAP25 (ENSG00000163219)	0.5	-3	-2.4	-3	-3	-3	-3	-3	-3
KCNMB2	KCNMB2 (ENSG00000197584)	0.5	-3	-3	-2.74	-3	-3	-3	-3	-3
HMGB1P19	HMGB1P19 (ENSG00000253463)	0.5	-3	-2.12	-3	-3	-3	-3	-3	-3
LRIT3	LRIT3 (ENSG00000183423)	0.5	-3	-3	-2.18	-3	-3	-3	-3	-3
UBE2HP1	UBE2HP1 (ENSG00000253677)	0.5	-3	-2.12	-3	-3	-3	-3	-3	-3
CRYBA2	CRYBA2 (ENSG00000163499)	0.5	-3	-3	-3	-2.25	-3	-3	-3	-3
WEE2	WEE2 (ENSG00000214102)	0.5	-3	-3	-1.6	-3	-3	-3	-3	-3
RPL7P17	RPL7P17 (ENSG00000214062)	0.5	-3	-2.64	-3	-3	-3	-3	-3	-3
RN7SL399P	RN7SL399P (ENSG00000239542)	0.5	-3	-3	-3	-0.45	-3	-3	-3	-3
HMGN1P26	HMGN1P26 (ENSG00000259557)	0.5	-3	-3	-0.84	-3	-3	-3	-3	-3
LINC01030	LINC01030 (ENSG00000253799)	0.5	-3	-3	-2.64	-3	-3	-3	-3	-3
LINC01608	LINC01608 (ENSG00000253877)	0.5	-3	-3	-2.94	-3	-3	-3	-3	-3
RRM2P3	RRM2P3 (ENSG00000214018)	0.5	-2.84	-3	-3	-3	-3	-3	-3	-3
RPL7AP14	RPL7AP14 (ENSG00000213979)	0.5	-3	-3	-1.56	-3	-3	-3	-3	-3
HBG1	HBG1 (ENSG00000213934)	0.5	-3	-2.64	-3	-3	-3	-3	-3	-3
UBE2Q2L	UBE2Q2L (ENSG00000259511)	0.5	-3	-3	-3	-1.69	-3	-3	-3	-3
UBD	UBD (ENSG00000213886)	0.5	-3	-3	-3	-2.56	-3	-3	-3	-3
DHRS9	DHRS9 (ENSG00000073737)	0.5	-3	-3	-2.4	-3	-3	-3	-3	-3
TRMT112P4	TRMT112P4 (ENSG00000236763)	0.5	-3	-3	-3	-1.79	-3	-3	-3	-3
KLK14	KLK14 (ENSG00000129437)	0.5	-3	-3	-2.94	-3	-3	-3	-3	-3
ADCY4	ADCY4 (ENSG00000129467)	0.5	-3	-3	-2.06	-3	-3	-3	-3	-3
KLRK1	KLRK1 (ENSG00000213809)	0.5	-3	-3	-2.74	-3	-3	-3	-3	-3
GALNT16	GALNT16 (ENSG00000100626)	0.5	-1.25	-3	-3	-3	-3	-3	-3	-3
PHBP7	PHBP7 (ENSG00000213711)	0.5	-3	-3	-2.94	-3	-3	-3	-3	-3
SLC9C1	SLC9C1 (ENSG00000172139)	0.5	-3	-3	-2.32	-3	-3	-3	-3	-3
HMGB1P10	HMGB1P10 (ENSG00000213707)	0.5	-3	-3	-2.94	-3	-3	-3	-3	-3
IGHV2OR16-5	IGHV2OR16-5 (ENSG00000259303)	0.5	-3	-1.18	-3	-3	-3	-3	-3	-3
ADAT3	ADAT3 (ENSG00000213638)	0.5	-3	-3	-2.94	-3	-3	-3	-3	-3
SPANXA1	SPANXA1 (ENSG00000198021)	0.5	-2.32	-3	-3	-3	-3	-3	-3	-3
FAM85B	FAM85B (ENSG00000253893)	0.5	-3	-3	-2.84	-3	-3	-3	-3	-3
TEX37	TEX37 (ENSG00000172073)	0.5	-3	-3	-3	-2.32	-3	-3	-3	-3
RN7SL573P	RN7SL573P (ENSG00000239607)	0.5	-3	-3	-3	-0.29	-3	-3	-3	-3
KRT18P19	KRT18P19 (ENSG00000213601)	0.5	-3	-3	-3	-2.64	-3	-3	-3	-3
HMGN1P7	HMGN1P7 (ENSG00000239614)	0.5	-3	-3	-3	-0.03	-3	-3	-3	-3
RPS4XP22	RPS4XP22 (ENSG00000239830)	0.5	-3	-2.84	-3	-3	-3	-3	-3	-3
ZBTB7C	ZBTB7C (ENSG00000184828)	0.5	-3	-3	-2.94	-3	-3	-3	-3	-3
FBXW12	FBXW12 (ENSG00000164049)	0.5	-3	-3	-3	-2.56	-3	-3	-3	-3
ANKRD35	ANKRD35 (ENSG00000198483)	0.5	-3	-3	-3	-2.94	-3	-3	-3	-3
IL2RB	IL2RB (ENSG00000100385)	0.5	-3	-2.94	-3	-3	-3	-3	-3	-3
TMEM155	TMEM155 (ENSG00000164112)	0.5	-3	-3	-0.97	-3	-3	-3	-3	-3
PCDHGB2	PCDHGB2 (ENSG00000253910)	0.5	-2.74	-3	-3	-3	-3	-3	-3	-3
ATF4P1	ATF4P1 (ENSG00000213338)	0.5	-3	-3	-2.47	-3	-3	-3	-3	-3
APOL4	APOL4 (ENSG00000100336)	0.5	-3	-3	-2.47	-3	-3	-3	-3	-3
SCGB3A2	SCGB3A2 (ENSG00000164265)	0.5	-3	-3	-0.69	-3	-3	-3	-3	-3
ACR	ACR (ENSG00000100312)	0.5	-3	-3	-3	-2.32	-3	-3	-3	-3
CMYA5	CMYA5 (ENSG00000164309)	0.5	-3	-3	-2.25	-3	-3	-3	-3	-3
CLDN23	CLDN23 (ENSG00000253958)	0.5	-3	-3	-2.74	-3	-3	-3	-3	-3
ADAM20P1	ADAM20P1 (ENSG00000259158)	0.5	-3	-3	-1.89	-3	-3	-3	-3	-3
ERHP1	ERHP1 (ENSG00000254270)	0.5	-3	-3	-0.94	-3	-3	-3	-3	-3
EI24P2	EI24P2 (ENSG00000236257)	0.5	-3	-3	-3	-2.18	-3	-3	-3	-3
PLN	PLN (ENSG00000198523)	0.5	-3	-3	-3	-2.32	-3	-3	-3	-3
PAH	PAH (ENSG00000171759)	0.5	-2.32	-3	-3	-3	-3	-3	-3	-3
ATP12A	ATP12A (ENSG00000075673)	0.5	-3	-3	-1.36	-3	-3	-3	-3	-3
MIR2052HG	MIR2052HG (ENSG00000254349)	0.5	-3	-3	-3	-1.94	-3	-3	-3	-3
ARHGAP15	ARHGAP15 (ENSG00000075884)	0.5	-3	-1.74	-3	-3	-3	-3	-3	-3
RPS15AP36	RPS15AP36 (ENSG00000213013)	0.5	-3	-3	-1.79	-3	-3	-3	-3	-3
HSPB2-C11orf52	HSPB2-C11orf52 (ENSG00000254445)	0.5	-3	-3	-2	-3	-3	-3	-3	-3
ENPP7P12	ENPP7P12 (ENSG00000254527)	0.5	-3	-3	-3	-1.74	-3	-3	-3	-3
KRTAP4-11	KRTAP4-11 (ENSG00000212721)	0.5	-3	-2.94	-3	-3	-3	-3	-3	-3
SHH	SHH (ENSG00000164690)	0.5	-3	-3	-2.56	-3	-3	-3	-3	-3
MYO16-AS1	MYO16-AS1 (ENSG00000236242)	0.5	-3	-3	-2.06	-3	-3	-3	-3	-3
SNORA74B	SNORA74B (ENSG00000212402)	0.5	-3	-3	2.47	-3	-3	-3	-3	-3
NAV2-AS3	NAV2-AS3 (ENSG00000254542)	0.5	-3	-3	-1.6	-3	-3	-3	-3	-3
KCNV1	KCNV1 (ENSG00000164794)	0.5	-3	-3	-2.56	-3	-3	-3	-3	-3
XIRP2-AS1	XIRP2-AS1 (ENSG00000254552)	0.5	-3	-2.12	-3	-3	-3	-3	-3	-3
IGHV4-61	IGHV4-61 (ENSG00000211970)	0.5	-3	-3	-3	-2.74	-3	-3	-3	-3
IGHV4-34	IGHV4-34 (ENSG00000211956)	0.5	-3	-3	-3	-2	-3	-3	-3	-3
BBOX1-AS1	BBOX1-AS1 (ENSG00000254560)	0.5	-2.94	-3	-3	-3	-3	-3	-3	-3
CPA6	CPA6 (ENSG00000165078)	0.5	-2.4	-3	-3	-3	-3	-3	-3	-3
PRADC1P1	PRADC1P1 (ENSG00000236165)	0.5	-3	-3	-3	-2.84	-3	-3	-3	-3
IGHV3-23	IGHV3-23 (ENSG00000211949)	0.5	-3	-2.74	-3	-3	-3	-3	-3	-3
TRAV27	TRAV27 (ENSG00000211809)	0.5	-3	-3	-3	-2.18	-3	-3	-3	-3
C9orf84	C9orf84 (ENSG00000165181)	0.5	-3	-2.32	-3	-3	-3	-3	-3	-3
CXorf58	CXorf58 (ENSG00000165182)	0.5	-3	-2.4	-3	-3	-3	-3	-3	-3
PCDH19	PCDH19 (ENSG00000165194)	0.5	-3	-3	-1.89	-3	-3	-3	-3	-3
TRBV10-1	TRBV10-1 (ENSG00000211717)	0.5	-2.47	-3	-3	-3	-3	-3	-3	-3
CYCSP45	CYCSP45 (ENSG00000184844)	0.5	-1.29	-3	-3	-3	-3	-3	-3	-3
STT3A-AS1	STT3A-AS1 (ENSG00000254671)	0.5	-3	-3	-0.47	-3	-3	-3	-3	-3
IGLV2-11	IGLV2-11 (ENSG00000211668)	0.5	-2.32	-3	-3	-3	-3	-3	-3	-3
RN7SL225P	RN7SL225P (ENSG00000239856)	0.5	-3	-3	-0.74	-3	-3	-3	-3	-3
FAR1-IT1	FAR1-IT1 (ENSG00000254791)	0.5	-3	-2.18	-3	-3	-3	-3	-3	-3
SH2D3C	SH2D3C (ENSG00000095370)	0.5	-3	-3	-2.94	-3	-3	-3	-3	-3
IGLV2-23	IGLV2-23 (ENSG00000211660)	0.5	-3	-3	-3	-2.74	-3	-3	-3	-3
TPPP	TPPP (ENSG00000171368)	0.5	-3	-3	-3	-2.64	-3	-3	-3	-3
RNU2-11P	RNU2-11P (ENSG00000239122)	0.5	-3	1.41	-3	-3	-3	-3	-3	-3
IGLV1-50	IGLV1-50 (ENSG00000211645)	0.5	-3	-2.56	-3	-3	-3	-3	-3	-3
LINC00519	LINC00519 (ENSG00000258955)	0.5	-3	-3	-2.47	-3	-3	-3	-3	-3
SNORA49	SNORA49 (ENSG00000208892)	0.5	-3	-3	5.02	-3	-3	-3	-3	-3
ZDHHC20P3	ZDHHC20P3 (ENSG00000255460)	0.5	-3	-3	-3	-1.32	-3	-3	-3	-3
TBX15	TBX15 (ENSG00000092607)	0.5	-3	-3	-2.94	-3	-3	-3	-3	-3
SNORA8	SNORA8 (ENSG00000207304)	0.5	-3	-3	-3	3.75	-3	-3	-3	-3
FAM9A	FAM9A (ENSG00000183304)	0.5	-3	-3	-1.51	-3	-3	-3	-3	-3
OR2M4	OR2M4 (ENSG00000171180)	0.5	-2.47	-3	-3	-3	-3	-3	-3	-3
RNASE7	RNASE7 (ENSG00000165799)	0.5	-3	-2.94	-3	-3	-3	-3	-3	-3
SNORA29	SNORA29 (ENSG00000206910)	0.5	-3	3.79	-3	-3	-3	-3	-3	-3
ERICH6B	ERICH6B (ENSG00000165837)	0.5	-3	-3	-3	-1.64	-3	-3	-3	-3
RPL39P36	RPL39P36 (ENSG00000239912)	0.5	-3	-3	-3	3.46	-3	-3	-3	-3
OR11H7	OR11H7 (ENSG00000258806)	0.5	-3	-3	-3	-2.25	-3	-3	-3	-3
CEACAM3	CEACAM3 (ENSG00000170956)	0.5	-3	-3	-2.4	-3	-3	-3	-3	-3
XKR4	XKR4 (ENSG00000206579)	0.5	-3	-3	-1.89	-3	-3	-3	-3	-3
EPS8L3	EPS8L3 (ENSG00000198758)	0.5	-3	-3	-1.43	-3	-3	-3	-3	-3
LRTM2	LRTM2 (ENSG00000166159)	0.5	-3	-3	-2.74	-3	-3	-3	-3	-3
FAM222A-AS1	FAM222A-AS1 (ENSG00000255650)	0.5	-2.64	-3	-3	-3	-3	-3	-3	-3
HNRNPA1P4	HNRNPA1P4 (ENSG00000206228)	0.5	-2.64	-3	-3	-3	-3	-3	-3	-3
TDGP1	TDGP1 (ENSG00000255725)	0.5	-1.36	-3	-3	-3	-3	-3	-3	-3
ANKRD20A2	ANKRD20A2 (ENSG00000183148)	0.5	-3	-1.84	-3	-3	-3	-3	-3	-3
ARHGEF15	ARHGEF15 (ENSG00000198844)	0.5	-3	-3	-2.47	-3	-3	-3	-3	-3
SCN3B	SCN3B (ENSG00000166257)	0.5	-3	-3	-0.89	-3	-3	-3	-3	-3
ADCY2	ADCY2 (ENSG00000078295)	0.5	-3	-3	-2.18	-3	-3	-3	-3	-3
IGLL3P	IGLL3P (ENSG00000206066)	0.5	-3	-2.84	-3	-3	-3	-3	-3	-3
LMO1	LMO1 (ENSG00000166407)	0.5	-3	-3	-2.74	-3	-3	-3	-3	-3
IFITM5	IFITM5 (ENSG00000206013)	0.5	-3	-3	-3	-2.74	-3	-3	-3	-3
LINC01397	LINC01397 (ENSG00000258673)	0.5	-3	-3	-3	-2.12	-3	-3	-3	-3
KCNH4	KCNH4 (ENSG00000089558)	0.5	-3	-3	-2.64	-3	-3	-3	-3	-3
KRTAP5-1	KRTAP5-1 (ENSG00000205869)	0.5	-3	-3	-1.89	-3	-3	-3	-3	-3
CFAP52	CFAP52 (ENSG00000166596)	0.5	-3	-3	-3	-2.18	-3	-3	-3	-3
KRTAP5-2	KRTAP5-2 (ENSG00000205867)	0.5	-3	-3	-3	-2.94	-3	-3	-3	-3
COX7B2	COX7B2 (ENSG00000170516)	0.5	-3	-3	-2.94	-3	-3	-3	-3	-3
HNRNPABP1	HNRNPABP1 (ENSG00000255734)	0.5	-3	-3	-3	-2.74	-3	-3	-3	-3
TTC23L	TTC23L (ENSG00000205838)	0.5	-3	-3	-1.43	-3	-3	-3	-3	-3
SAA3P	SAA3P (ENSG00000166787)	0.5	-3	-3	-1.6	-3	-3	-3	-3	-3
HSD17B13	HSD17B13 (ENSG00000170509)	0.5	-3	-3	-2.94	-3	-3	-3	-3	-3
TPTE2P6	TPTE2P6 (ENSG00000205822)	0.5	-3	-3	-2.47	-3	-3	-3	-3	-3
CCND2-AS2	CCND2-AS2 (ENSG00000255920)	0.5	-3	-3	-2.64	-3	-3	-3	-3	-3
ATF4P4	ATF4P4 (ENSG00000256167)	0.5	-3	-2.84	-3	-3	-3	-3	-3	-3
RPL7AP3	RPL7AP3 (ENSG00000256243)	0.5	-2.94	-3	-3	-3	-3	-3	-3	-3
LINC00930	LINC00930 (ENSG00000258647)	0.5	-2.64	-3	-3	-3	-3	-3	-3	-3
KRT75	KRT75 (ENSG00000170454)	0.5	-0.6	-3	-3	-3	-3	-3	-3	-3
DND1	DND1 (ENSG00000256453)	0.5	-3	-3	-2.12	-3	-3	-3	-3	-3
SCTR	SCTR (ENSG00000080293)	0.5	-3	-3	-0.42	-3	-3	-3	-3	-3
C11orf91	C11orf91 (ENSG00000205177)	0.5	-2.84	-3	-3	-3	-3	-3	-3	-3
LRRN2	LRRN2 (ENSG00000170382)	0.5	-1.94	-3	-3	-3	-3	-3	-3	-3
LINC00905	LINC00905 (ENSG00000167459)	0.5	-3	-3	-1.51	-3	-3	-3	-3	-3
STH	STH (ENSG00000256762)	0.5	-3	-2.94	-3	-3	-3	-3	-3	-3
PCDHA7	PCDHA7 (ENSG00000204963)	0.5	-3	-3	-2.47	-3	-3	-3	-3	-3
C12orf80	C12orf80 (ENSG00000257137)	0.5	-3	-2.74	-3	-3	-3	-3	-3	-3
ACSBG2	ACSBG2 (ENSG00000130377)	0.5	-3	-3	-1.03	-3	-3	-3	-3	-3
PCDHGA1	PCDHGA1 (ENSG00000204956)	0.5	-2.4	-3	-3	-3	-3	-3	-3	-3
RNU1-83P	RNU1-83P (ENSG00000200296)	0.5	-3	2.4	-3	-3	-3	-3	-3	-3
RN7SL368P	RN7SL368P (ENSG00000239948)	0.5	-0.62	-3	-3	-3	-3	-3	-3	-3
RN7SKP87	RN7SKP87 (ENSG00000200966)	0.5	-3	-1.32	-3	-3	-3	-3	-3	-3
LRRC3C	LRRC3C (ENSG00000204913)	0.5	-3	-3	-2.47	-3	-3	-3	-3	-3
KRT25	KRT25 (ENSG00000204897)	0.5	-3	-3	-3	-2.94	-3	-3	-3	-3
ZNF204P	ZNF204P (ENSG00000204789)	0.5	-3	-2.64	-3	-3	-3	-3	-3	-3
SERPINF2	SERPINF2 (ENSG00000167711)	0.5	-3	-3	-0.54	-3	-3	-3	-3	-3
KLK4	KLK4 (ENSG00000167749)	0.5	-3	-3	-3	-2.56	-3	-3	-3	-3
ONECUT1	ONECUT1 (ENSG00000169856)	0.5	-3	-2.94	-3	-3	-3	-3	-3	-3
KLK11	KLK11 (ENSG00000167757)	0.5	-3	-3	-2.47	-3	-3	-3	-3	-3
OR7E47P	OR7E47P (ENSG00000257542)	0.5	-3	-3	-1.47	-3	-3	-3	-3	-3
SAG	SAG (ENSG00000130561)	0.5	-3	-3	-1.06	-3	-3	-3	-3	-3
GSDMA	GSDMA (ENSG00000167914)	0.5	-3	-3	-2.56	-3	-3	-3	-3	-3
C9orf41-AS1	C9orf41-AS1 (ENSG00000203321)	0.5	-3	-3	-3	-2.64	-3	-3	-3	-3
C5orf60	C5orf60 (ENSG00000204661)	0.5	-3	-3	-3	-2.06	-3	-3	-3	-3
LDB2	LDB2 (ENSG00000169744)	0.5	-2.74	-3	-3	-3	-3	-3	-3	-3
OR2H2	OR2H2 (ENSG00000204657)	0.5	-3	-2.47	-3	-3	-3	-3	-3	-3
MGAM2	MGAM2 (ENSG00000257743)	0.5	-3	-3	-0.86	-3	-3	-3	-3	-3
NAALADL1	NAALADL1 (ENSG00000168060)	0.5	-3	-3	-2.4	-3	-3	-3	-3	-3
OR5BK1P	OR5BK1P (ENSG00000257763)	0.5	-3	-3	-2.94	-3	-3	-3	-3	-3
OR2W6P	OR2W6P (ENSG00000168126)	0.5	-3	-2.84	-3	-3	-3	-3	-3	-3
AKIRIN1P1	AKIRIN1P1 (ENSG00000257786)	0.5	-3	-2.47	-3	-3	-3	-3	-3	-3
EFR3B	EFR3B (ENSG00000084710)	0.5	-3	-3	-2.84	-3	-3	-3	-3	-3
PNMA6A	PNMA6A (ENSG00000235961)	0.5	-2.94	-3	-3	-3	-3	-3	-3	-3
MOBP	MOBP (ENSG00000168314)	0.5	-3	-3	-2.56	-3	-3	-3	-3	-3
FXYD6P1	FXYD6P1 (ENSG00000270762)	0.5	-3	-3	-3	-0.6	-3	-3	-3	-3
MCCD1	MCCD1 (ENSG00000204511)	0.5	-3	-3	-3	-2.64	-3	-3	-3	-3
C1GALT1P1	C1GALT1P1 (ENSG00000257818)	0.5	-3	-3	-3	-2.18	-3	-3	-3	-3
IGKV3-20	IGKV3-20 (ENSG00000239951)	0.5	-3	-2.56	-3	-3	-3	-3	-3	-3
LSM3P2	LSM3P2 (ENSG00000257847)	0.5	-0.54	-3	-3	-3	-3	-3	-3	-3
ABCC8	ABCC8 (ENSG00000006071)	0.5	-3	-2.25	-3	-3	-3	-3	-3	-3
SPANXN5	SPANXN5 (ENSG00000204363)	0.5	-3	-3	-2.84	-3	-3	-3	-3	-3
SP5	SP5 (ENSG00000204335)	0.5	-3	-2.94	-3	-3	-3	-3	-3	-3
TRPM3	TRPM3 (ENSG00000083067)	0.5	-1.47	-3	-3	-3	-3	-3	-3	-3
LINC01587	LINC01587 (ENSG00000082929)	0.5	-3	-3	-2.06	-3	-3	-3	-3	-3
DYNLL1P2	DYNLL1P2 (ENSG00000258605)	0.5	-3	-3	-3	-0.32	-3	-3	-3	-3
FOXO6	FOXO6 (ENSG00000204060)	0.5	-3	-3	-2.74	-3	-3	-3	-3	-3
LRRC73	LRRC73 (ENSG00000204052)	0.5	-3	-3	-2.64	-3	-3	-3	-3	-3
SIGLEC7	SIGLEC7 (ENSG00000168995)	0.5	-2.84	-3	-3	-3	-3	-3	-3	-3
TRPC5OS	TRPC5OS (ENSG00000204025)	0.5	-3	-3	-2.64	-3	-3	-3	-3	-3
LIPJ	LIPJ (ENSG00000204022)	0.5	-3	-3	-2.12	-3	-3	-3	-3	-3
AR	AR (ENSG00000169083)	0.5	-2.56	-3	-3	-3	-3	-3	-3	-3
HSP90B3P	HSP90B3P (ENSG00000203914)	0.5	-3	-2.84	-3	-3	-3	-3	-3	-3
CFHR2	CFHR2 (ENSG00000080910)	0.5	-3	-3	-3	-2.18	-3	-3	-3	-3
HSD3B2	HSD3B2 (ENSG00000203859)	0.5	-3	-3	-2.64	-3	-3	-3	-3	-3
PTTG4P	PTTG4P (ENSG00000258571)	0.5	-1.79	-3	-3	-3	-3	-3	-3	-3
ASB9P1	ASB9P1 (ENSG00000258527)	0.5	-3	-2.84	-3	-3	-3	-3	-3	-3
HIST2H2BC	HIST2H2BC (ENSG00000203819)	0.5	-3	-3	-3	-1.6	-3	-3	-3	-3
RPL23AP92	RPL23AP92 (ENSG00000270723)	0.5	-3	-3	-3	0.97	-3	-3	-3	-3
FBXL3	FBXL3 (ENSG00000005812)	0.5	4.25	4.46	4.21	4.15	4.14	4.27	4.14	4.1
DHODH	DHODH (ENSG00000102967)	0.5	3.2	3.27	2.82	3.06	3.04	2.8	2.85	3.03
HACD3	HACD3 (ENSG00000074696)	0.5	6.26	6.23	6.16	5.99	6.1	6.04	6.03	6.13
HIATL2	HIATL2 (ENSG00000196312)	0.5	1.38	0.6	2.09	1.6	0.78	0.76	1.29	1.1
CMPK1	CMPK1 (ENSG00000162368)	0.5	6.93	6.79	6.94	6.49	6.65	6.67	6.62	6.72
HNRNPKP4	HNRNPKP4 (ENSG00000243547)	0.5	0.19	0.19	-0.2	-0.12	-0.45	0.06	-0.43	-0.04
C4orf46	C4orf46 (ENSG00000205208)	0.5	4.21	4.05	4.84	3.25	3.86	3.83	3.21	3.54
GINS1	GINS1 (ENSG00000101003)	0.5	4.93	4.6	4.26	4.43	4.28	4.24	4.36	4.52
THRAP3	THRAP3 (ENSG00000054118)	0.5	6.07	5.68	5.81	5.84	5.45	5.47	5.84	5.87
DLST	DLST (ENSG00000119689)	0.5	6.25	6.04	5.84	5.91	5.88	5.83	5.86	5.98
RAP1AP	RAP1AP (ENSG00000258769)	0.5	-3	-3	-1.36	-2.4	-3	-3	-3	-2.64
USP2	USP2 (ENSG00000036672)	0.5	-3	-3	-2	-2.74	-3	-3	-2.84	-3
PCNA	PCNA (ENSG00000132646)	0.5	8.32	7.17	7.91	7.64	6.94	6.93	7.63	7.73
PCDH18	PCDH18 (ENSG00000189184)	0.49	-1.51	-2.25	-3	-3	-2.74	-2.74	-3	-3
BAHD1	BAHD1 (ENSG00000140320)	0.49	3.67	3.45	3.93	3.68	3.53	3.57	3.61	3.57
PRKDC	PRKDC (ENSG00000253729)	0.49	7.78	7.59	7.59	7.49	7.45	7.49	7.49	7.63
HSPH1	HSPH1 (ENSG00000120694)	0.49	7.62	7.31	7.26	6.39	6.99	7.01	6.45	6.5
GMNN	GMNN (ENSG00000112312)	0.49	5.83	5.42	5.97	5.49	5.1	5.09	5.6	5.74
STAU1	STAU1 (ENSG00000124214)	0.49	6.42	6.29	6.23	5.81	6.11	6.1	5.87	5.89
ZC3H4	ZC3H4 (ENSG00000130749)	0.49	3.95	3.76	4.03	4.38	3.69	3.47	4.09	3.85
MORC4	MORC4 (ENSG00000133131)	0.49	3.67	3.51	3.67	3.92	2.96	2.92	3.77	3.82
SLC6A6	SLC6A6 (ENSG00000131389)	0.49	3.86	3.14	3.93	3.19	3.37	3.29	3.1	3.3
PSMC6	PSMC6 (ENSG00000100519)	0.49	7.43	7.47	7.29	7.18	7.21	7.25	7.24	7.33
WAPAL	WAPAL (ENSG00000062650)	0.49	4.79	4.78	4.78	4.64	4.56	4.63	4.63	4.81
MNS1	MNS1 (ENSG00000138587)	0.49	2.22	2.04	1.65	1.85	1.85	1.65	1.87	1.69
TENM1	TENM1 (ENSG00000009694)	0.49	0.2	-0.94	1.06	-0.92	-0.58	-0.74	-0.92	-0.58
CDK11B	CDK11B (ENSG00000248333)	0.49	5.37	5.43	5.72	5.7	5.21	5.2	5.6	5.46
HIAT1	HIAT1 (ENSG00000156875)	0.49	5	4.74	5.09	4.53	4.65	4.67	4.59	4.79
DPY19L1	DPY19L1 (ENSG00000173852)	0.49	5.13	4.65	4.56	4.26	4.57	4.57	4.09	4.17
DDX24	DDX24 (ENSG00000089737)	0.49	6.76	6.48	6.16	6.27	6.29	6.35	6.09	6.2
NOC2L	NOC2L (ENSG00000188976)	0.49	6.25	5.59	6.03	6.03	5.61	5.64	5.82	5.96
DDX21	DDX21 (ENSG00000165732)	0.49	7.86	7.7	8.12	7.9	7.35	7.36	7.86	8.01
CHAF1A	CHAF1A (ENSG00000167670)	0.49	4.58	4.16	3.84	3.72	3.94	3.99	3.44	3.67
SLC7A1	SLC7A1 (ENSG00000139514)	0.49	4.57	4.45	4.08	4.04	4.13	4.11	3.94	4.22
VDAC1P2	VDAC1P2 (ENSG00000213856)	0.49	-1.56	-1.43	-1.4	-1.64	-1.6	-3	-3	-0.79
TP53I11	TP53I11 (ENSG00000175274)	0.49	-3	-3	-1.43	-2.06	-3	-3	-2.56	-2.84
RHOBTB2	RHOBTB2 (ENSG00000008853)	0.49	1.51	1.58	1.31	1.55	1.03	0.7	1.65	1.49
SNHG10	SNHG10 (ENSG00000247092)	0.49	2.39	2.06	3.08	1.92	1.44	2.34	1.57	2.21
UBE2D3	UBE2D3 (ENSG00000109332)	0.49	7.21	7.19	7.11	6.96	7.1	7.06	6.96	6.99
H2AFZ	H2AFZ (ENSG00000164032)	0.49	9.68	8.9	8.6	8.64	8.74	8.72	8.64	8.65
FAM183B	FAM183B (ENSG00000164556)	0.49	-3	-3	-1.74	-2.94	-3	-3	-3	-2.94
SYPL1	SYPL1 (ENSG00000008282)	0.48	6.6	6.42	6.35	5.95	6.22	6.21	6.03	6.16
PGM5P4-AS1	PGM5P4-AS1 (ENSG00000231943)	0.48	0.46	-3	-3	-3	-2.94	-3	-3	-3
SLX4IP	SLX4IP (ENSG00000149346)	0.48	1.41	1.88	1.2	1.4	1.45	1.34	1.19	0.7
DGCR14	DGCR14 (ENSG00000100056)	0.48	2.78	2.67	3.02	2.74	2.65	2.75	2.48	2.77
PARP4	PARP4 (ENSG00000102699)	0.48	4.58	4.15	3.75	3.75	3.92	3.87	3.77	3.74
POU3F2	POU3F2 (ENSG00000184486)	0.48	0.16	-2.06	-3	-3	-2.4	-2.94	-3	-3
HAPLN2	HAPLN2 (ENSG00000132702)	0.48	-3	-3	0	-3	-3	-3	-3	-2.94
ACHE	ACHE (ENSG00000087085)	0.48	-3	-3	-2.18	-1.74	-3	-3	-3	-2.56
MYPOP	MYPOP (ENSG00000176182)	0.48	0.69	0.97	1.73	1.5	0.65	0.92	1.08	0.97
GCH1	GCH1 (ENSG00000131979)	0.48	1.87	1.72	2.88	2.15	0.77	1.06	2.21	2.17
ZWINT	ZWINT (ENSG00000122952)	0.48	7.02	6.4	6.32	6.61	6.06	5.99	6.47	6.62
L2HGDH	L2HGDH (ENSG00000087299)	0.48	3.37	3.27	4.12	3.73	2.9	3.02	3.47	3.66
HLA-DRB5	HLA-DRB5 (ENSG00000198502)	0.48	-1.32	-2.56	-3	-3	-2.94	-2.94	-3	-2.74
POLD3	POLD3 (ENSG00000077514)	0.48	4.24	3.98	3.85	3.78	3.6	3.59	3.83	4.04
ZNF624	ZNF624 (ENSG00000197566)	0.48	0.86	0.52	1.45	0.8	0.5	0.41	0.66	0.9
SMIM11	SMIM11 (ENSG00000205670)	0.48	5.4	5.49	5.18	5.23	5.34	5.15	5.15	5.22
CAMK2N2	CAMK2N2 (ENSG00000163888)	0.48	0.93	0.65	2.28	0.72	0.03	-0.06	0.93	1.09
MANEA	MANEA (ENSG00000172469)	0.48	3.9	3.39	3.75	3.17	3.33	3.21	3.25	3.52
TMEM59L	TMEM59L (ENSG00000105696)	0.48	-2.47	-3	-1.6	-1.94	-3	-3	-2.74	-2.18
HNRNPC	HNRNPC (ENSG00000092199)	0.48	10.5	10.26	9.93	10	9.94	9.96	10.03	10.11
SLC38A11	SLC38A11 (ENSG00000169507)	0.48	-3	-3	-2.25	-1.32	-3	-3	-2.56	-2.94
RNFT1	RNFT1 (ENSG00000189050)	0.48	4.22	4.66	4.63	4.25	4.08	4.32	4.27	4.4
ENTPD3-AS1	ENTPD3-AS1 (ENSG00000223797)	0.48	1.88	1.51	1.79	1.4	1.29	1.07	1.86	1.29
RPS15AP1	RPS15AP1 (ENSG00000214535)	0.48	0.33	-0.12	-0.86	0.68	0.45	-2.18	-0.49	-1.12
RASGEF1C	RASGEF1C (ENSG00000146090)	0.47	-3	-3	-0.86	-2.84	-3	-3	-2.84	-3
CMC2	CMC2 (ENSG00000103121)	0.47	6.49	6.07	6.52	6.17	5.88	5.8	6.19	6.4
HNRNPA0	HNRNPA0 (ENSG00000177733)	0.47	6.63	6.27	6.59	6.59	6.33	6.37	6.37	6.53
NPM1	NPM1 (ENSG00000181163)	0.47	12.6	12.17	11.87	12.09	12.03	12.08	11.99	11.95
MTHFD2	MTHFD2 (ENSG00000065911)	0.47	6.53	7.08	7	6.45	6.65	6.68	6.42	6.47
TEKT5	TEKT5 (ENSG00000153060)	0.47	-3	-2.4	-2.25	-1.89	-3	-3	-3	-2.18
ZFP91-CNTF	ZFP91-CNTF (ENSG00000255073)	0.47	-2.64	-3	-0.94	-2.64	-2.94	-2.64	-2.74	-2.94
MARS2	MARS2 (ENSG00000247626)	0.47	4.11	3.55	3.57	3.08	3.4	3.47	3.19	3.16
CALM2P2	CALM2P2 (ENSG00000229097)	0.47	0.96	1.54	-0.27	0.28	0.94	0.03	-0.54	-1
KIF21B	KIF21B (ENSG00000116852)	0.47	1.78	0.82	0.16	-0.23	0.46	0.41	-0.69	-0.43
LAS1L	LAS1L (ENSG00000001497)	0.47	6.06	5.61	5.73	5.96	5.37	5.39	5.84	5.86
FAM126A	FAM126A (ENSG00000122591)	0.47	4.29	3.92	4.48	4.51	3.7	3.53	4.31	4.36
MCM6	MCM6 (ENSG00000076003)	0.47	5.87	5.25	4.81	5.01	5.05	5.03	4.89	4.98
NOV	NOV (ENSG00000136999)	0.47	1.58	0.38	0.62	0.18	0.41	0.55	0.1	0.11
HCFC1	HCFC1 (ENSG00000172534)	0.47	4.27	4.22	4.22	3.87	4.15	4.04	3.78	3.98
TUBB8P1	TUBB8P1 (ENSG00000229298)	0.47	-2.18	-1.47	-0.32	-0.86	-3	-2.25	-1.74	-0.97
RAB6C-AS1	RAB6C-AS1 (ENSG00000225449)	0.47	-3	-3	-1.15	-3	-3	-3	-3	-2.94
EBAG9P1	EBAG9P1 (ENSG00000233690)	0.47	-3	-1.51	-0.1	0.24	-2.12	-1.15	-3	-2.32
LINC01556	LINC01556 (ENSG00000204709)	0.47	-2.94	-3	0.12	-2.47	-2.74	-2.74	-3	-2.84
B3GAT2	B3GAT2 (ENSG00000112309)	0.47	-2.47	-3	-2.74	-3	-2.84	-3	-3	-3
KIF21A	KIF21A (ENSG00000139116)	0.47	4.66	3.85	3.82	4.01	3.51	3.58	3.98	4.04
PRPF38A	PRPF38A (ENSG00000134748)	0.47	4.73	4.74	4.74	5	4.52	4.49	4.82	4.79
NUPL2	NUPL2 (ENSG00000136243)	0.47	5.43	5.55	5.43	5.33	5.32	5.39	5.35	5.42
TNFAIP8	TNFAIP8 (ENSG00000145779)	0.47	3.57	2.81	3.02	2.65	2.86	2.97	2.52	2.51
MED31	MED31 (ENSG00000108590)	0.47	4.18	3.72	4.14	3.67	3.75	3.36	3.84	3.83
ERLIN2	ERLIN2 (ENSG00000147475)	0.47	5.46	5.36	5.04	5	5.24	5.2	4.75	4.73
HIST1H2AI	HIST1H2AI (ENSG00000196747)	0.47	-3	-0.43	-1.84	-1.89	-3	-1.51	-3	-3
STXBP4	STXBP4 (ENSG00000166263)	0.47	3.26	3.45	3.59	2.85	2.93	3.32	2.78	3.09
SEC14L5	SEC14L5 (ENSG00000103184)	0.47	-3	-3	-1.36	-3	-3	-3	-3	-2.94
ZNF124	ZNF124 (ENSG00000196418)	0.47	2.72	3.13	2.8	2.78	3	2.73	2.47	2.29
AK3P2	AK3P2 (ENSG00000250115)	0.47	-3	-3	-2.18	-1.22	-3	-3	-2.47	-3
SHISA3	SHISA3 (ENSG00000178343)	0.47	2.03	-2.18	-3	-3	-2.94	-2.32	-3	-3
ECHDC1	ECHDC1 (ENSG00000093144)	0.47	6.54	6.61	6.55	6.18	6.47	6.4	6.2	6.15
RAB26	RAB26 (ENSG00000167964)	0.47	-1.4	-3	-3	-3	-2.94	-3	-3	-3
ENPEP	ENPEP (ENSG00000138792)	0.47	-0.79	-0.81	-0.51	-2.4	-0.79	-1.43	-3	-2.94
HNRNPA3	HNRNPA3 (ENSG00000170144)	0.47	9.04	8.6	8.79	9.02	8.41	8.45	8.88	8.85
SH3PXD2B	SH3PXD2B (ENSG00000174705)	0.46	2.46	0.79	1.91	1.52	0.82	0.89	1.32	1.64
ANO1-AS2	ANO1-AS2 (ENSG00000254417)	0.46	-1.6	-2.94	-3	-3	-2.94	-2.94	-3	-3
CCDC74B	CCDC74B (ENSG00000152076)	0.46	-1.29	-2.12	-1.29	-3	-2.18	-2.84	-2.06	-3
DDX58	DDX58 (ENSG00000107201)	0.46	3.52	3.45	4.8	3.63	3.04	3.19	3.67	3.7
SMARCC2	SMARCC2 (ENSG00000139613)	0.46	4.79	4.55	4.47	4.4	4.53	4.48	4.27	4.39
FANCA	FANCA (ENSG00000187741)	0.46	5.03	4.18	3.97	3.73	4.03	4.01	3.6	3.85
ST7-OT4	ST7-OT4 (ENSG00000214188)	0.46	-1.64	-1.29	-2.64	-3	-2	-3	-3	-3
CEP85	CEP85 (ENSG00000130695)	0.46	4.21	4.15	5.1	4.35	3.88	3.91	4.16	4.5
MTND4P19	MTND4P19 (ENSG00000230338)	0.46	-3	-3	-3	-1.56	-3	-3	-3	-2.94
ARPC5L	ARPC5L (ENSG00000136950)	0.46	5.47	5.67	5.73	5.57	5.45	5.58	5.47	5.6
ABCB8	ABCB8 (ENSG00000197150)	0.46	3.46	3.04	2.83	2.66	2.84	3	2.3	2.67
DNAJC9	DNAJC9 (ENSG00000213551)	0.46	4.92	5.01	4.8	4.44	4.75	4.77	4.31	4.46
DCTPP1	DCTPP1 (ENSG00000179958)	0.46	6.27	5.79	6.13	6.01	5.53	5.63	5.98	6.15
TFRC	TFRC (ENSG00000072274)	0.46	7.94	6.9	8.74	7.52	6.66	6.53	7.55	7.78
EMG1	EMG1 (ENSG00000126749)	0.46	6.21	5.86	5.01	5.34	5.4	5.43	5.15	5.21
ALB	ALB (ENSG00000163631)	0.46	1.14	-1	0.2	0.6	-0.76	-0.84	0.45	-0.71
POLE3	POLE3 (ENSG00000148229)	0.46	6.44	6.29	6.07	6.05	6.17	6.13	6.03	6.06
TRIM47	TRIM47 (ENSG00000132481)	0.46	-1.56	-0.64	-3	-0.15	-2.56	-0.92	-3	-3
GVQW1	GVQW1 (ENSG00000241043)	0.46	-0.64	-1.84	-0.3	-0.34	-1.84	-1.84	-0.92	-0.86
C17orf85	C17orf85 (ENSG00000074356)	0.46	4.27	4.22	3.29	3.94	3.63	3.9	3.14	3.63
GPD1L	GPD1L (ENSG00000152642)	0.46	4.18	3.83	3.74	2.9	3.58	3.49	2.94	3.1
PSMB7	PSMB7 (ENSG00000136930)	0.46	8.06	8.12	8.32	8.26	7.93	7.9	8.22	8.19
ISOC1	ISOC1 (ENSG00000066583)	0.46	4.59	4.29	4.08	3.61	4.05	4.02	3.66	3.71
TRAF2	TRAF2 (ENSG00000127191)	0.46	3.65	3.68	3.77	3.21	3.47	3.68	2.98	3.13
GPRIN1	GPRIN1 (ENSG00000169258)	0.46	2.76	1.84	3.24	2.56	1.72	1.78	2.39	2.62
GATA2	GATA2 (ENSG00000179348)	0.46	2.51	2.07	1.92	2.24	2.03	2.14	1.87	2.02
TUBA1C	TUBA1C (ENSG00000167553)	0.46	10.52	9.55	9.73	9.96	9.45	9.49	9.84	9.82
SLC16A8	SLC16A8 (ENSG00000100156)	0.46	-3	-3	-1.18	-0.36	-3	-3	-3	-1.94
PPAT	PPAT (ENSG00000128059)	0.46	4.97	4.83	4.84	4.42	4.69	4.67	4.36	4.62
NT5CP1	NT5CP1 (ENSG00000258524)	0.46	-3	-3	-3	-1.74	-2.94	-3	-3	-3
HMGB3P4	HMGB3P4 (ENSG00000228808)	0.46	-3	-3	-1.74	-3	-2.94	-3	-3	-3
BEND3	BEND3 (ENSG00000178409)	0.46	1.21	0.77	1.22	1.18	0.37	0.15	1.27	1.17
SLC5A6	SLC5A6 (ENSG00000138074)	0.46	5.09	4.82	5.07	5.24	4.58	4.59	4.99	5.18
RAB21	RAB21 (ENSG00000080371)	0.46	5.11	5.3	5.71	5.11	5.11	5.1	5.22	5.17
RPL41P2	RPL41P2 (ENSG00000256338)	0.46	-1.12	-1.4	-0.86	0.68	-3	-1.22	-3	0.08
C16orf71	C16orf71 (ENSG00000166246)	0.46	-3	-2.12	-0.56	-2.06	-3	-3	-1.74	-3
STARD3NL	STARD3NL (ENSG00000010270)	0.46	6.15	6.06	5.88	5.82	5.85	5.87	5.95	5.87
FIBCD1	FIBCD1 (ENSG00000130720)	0.46	-1.79	-3	-3	-3	-3	-2.94	-3	-3
XPOTP1	XPOTP1 (ENSG00000214185)	0.46	-3	-1.79	-3	-3	-3	-2.94	-3	-3
HS3ST5	HS3ST5 (ENSG00000249853)	0.46	-1.89	-2.18	-3	-3	-2.94	-2.56	-3	-3
NAP1L4P1	NAP1L4P1 (ENSG00000177173)	0.46	-1.03	-1.94	-2.32	-2.06	-1.64	-3	-3	-2
HOXD3	HOXD3 (ENSG00000128652)	0.46	0.74	1.15	1.3	1.1	1.04	1.07	0.64	0.7
TEKT3	TEKT3 (ENSG00000125409)	0.46	-3	-2.32	-1.25	-2.94	-3	-2.47	-3	-3
DESI2	DESI2 (ENSG00000121644)	0.45	5.22	5.49	5.51	4.87	5.23	5.16	4.89	4.99
LPCAT3	LPCAT3 (ENSG00000111684)	0.45	4.31	3.53	4.01	4.09	3.24	3.45	3.94	4.02
PSMC2	PSMC2 (ENSG00000161057)	0.45	6.76	6.62	6.13	6.25	6.36	6.3	6.22	6.18
ISL1	ISL1 (ENSG00000016082)	0.45	-0.17	0.01	-0.25	0.23	-0.49	-0.92	-0.03	0.06
RAB11A	RAB11A (ENSG00000103769)	0.45	7.77	7.59	8.22	7.82	7.48	7.52	7.81	7.79
TMBIM6	TMBIM6 (ENSG00000139644)	0.45	8.38	8.22	8.48	8.35	8.1	8.05	8.34	8.42
PKMYT1	PKMYT1 (ENSG00000127564)	0.45	4.34	3.54	3.97	3.87	3.89	3.89	3.42	3.44
CILP2	CILP2 (ENSG00000160161)	0.45	-3	-3	-2.47	-2.47	-3	-3	-3	-2.74
CLIP2	CLIP2 (ENSG00000106665)	0.45	2.79	2.27	2.06	1.32	1.79	2.29	1.18	1
MDN1	MDN1 (ENSG00000112159)	0.45	4.37	4.4	4.57	3.97	4.21	4.33	3.96	4.06
MRPL34	MRPL34 (ENSG00000130312)	0.45	4.33	4.36	4.96	4.21	4.49	4.41	3.84	3.9
TMEM104	TMEM104 (ENSG00000109066)	0.45	2.63	2.61	3.3	2.89	2.65	2.52	2.45	2.88
RPL23AP1	RPL23AP1 (ENSG00000239257)	0.45	-3	-3	0.12	-1.79	-3	-3	-3	-2.12
GMDS	GMDS (ENSG00000112699)	0.45	3.92	4.15	4.09	4.12	3.86	3.48	3.96	4.23
MMD	MMD (ENSG00000108960)	0.45	3.65	3.46	4.29	3.5	3.15	3.09	3.64	3.73
SMC6	SMC6 (ENSG00000163029)	0.45	4.55	4.63	4.27	4.2	4.22	4.31	4.2	4.38
PLEK2	PLEK2 (ENSG00000100558)	0.45	0.11	-1.74	-3	-3	-2.47	-2.4	-3	-3
SLC2A5	SLC2A5 (ENSG00000142583)	0.45	-3	-3	-3	-1.25	-3	-3	-2.94	-2.94
TMEM170A	TMEM170A (ENSG00000166822)	0.45	3.56	3.82	4.36	3.58	3.54	3.38	3.68	3.75
BMP2K	BMP2K (ENSG00000138756)	0.45	2.82	3.1	3.54	2.84	2.91	2.82	2.7	3.02
FOXM1	FOXM1 (ENSG00000111206)	0.45	6.15	5.44	4.79	4.7	4.98	5.07	4.63	4.85
DCN	DCN (ENSG00000011465)	0.45	-3	-2.56	-1.79	-2.47	-3	-2.4	-3	-2.84
LRIG3	LRIG3 (ENSG00000139263)	0.45	2.43	2.29	2.44	1.48	2	2.1	1.41	1.74
DNAJB1	DNAJB1 (ENSG00000132002)	0.45	6.18	6.42	7.17	6.32	6.17	6.06	6.37	6.4
TCTEX1D4	TCTEX1D4 (ENSG00000188396)	0.45	-3	-3	-1.94	-3	-3	-2.94	-3	-3
HMGN2P5	HMGN2P5 (ENSG00000234664)	0.45	5.55	5.19	5.3	5.52	5.51	4.78	4.97	5.38
SNRPF	SNRPF (ENSG00000139343)	0.45	6.75	6.45	6.23	6.52	6.4	6.4	6.35	6.36
EP300-AS1	EP300-AS1 (ENSG00000231993)	0.45	-2.84	-3	-1.4	-2.4	-2.64	-2.64	-3	-3
RPS15AP10	RPS15AP10 (ENSG00000225447)	0.45	-2.18	-2.32	-3	-1.84	-3	-2.06	-3	-3
GCLC	GCLC (ENSG00000001084)	0.45	3.88	3.97	4.29	3.86	3.9	3.82	3.86	3.96
EEF1E1-BLOC1S5	EEF1E1-BLOC1S5 (ENSG00000265818)	0.45	-2.56	-3	1.25	-1.15	-3	-3	-1.94	-2
BUB1	BUB1 (ENSG00000169679)	0.45	6.23	5.69	6.39	6.22	5.39	5.4	6.15	6.23
GABRR2	GABRR2 (ENSG00000111886)	0.45	-3	-3	-2	-3	-3	-3	-2.94	-3
MC4R	MC4R (ENSG00000166603)	0.45	-2.32	-2.18	-3	-3	-2.94	-2.64	-3	-3
HAUS8	HAUS8 (ENSG00000131351)	0.45	3.82	3.8	4.05	3.78	3.58	3.33	3.87	3.94
HNRNPA1P16	HNRNPA1P16 (ENSG00000262333)	0.45	1.01	1.32	0.7	0.37	1.08	0.82	-1.25	0.18
DDIAS	DDIAS (ENSG00000165490)	0.45	3.66	3.77	3.69	3.04	3.31	3.44	3.16	3.41
SVIP	SVIP (ENSG00000198168)	0.45	4.57	4.68	4.14	3.68	4.22	4.3	3.35	3.54
FAM96AP2	FAM96AP2 (ENSG00000224566)	0.45	-2.94	-3	-1.51	0.44	-3	-3	-3	-1.89
NUDC	NUDC (ENSG00000090273)	0.45	7.41	6.85	6.53	6.57	6.67	6.72	6.52	6.56
SMG5	SMG5 (ENSG00000198952)	0.44	4.9	5.13	5.38	5.37	4.93	4.93	5.02	5.24
EEF1E1	EEF1E1 (ENSG00000124802)	0.44	7.11	7.51	7.19	7.23	7.13	7.2	7.21	7.05
EDEM1	EDEM1 (ENSG00000134109)	0.44	4.68	4.47	4.99	4.13	4.43	4.44	4.17	4.37
MEGF9	MEGF9 (ENSG00000106780)	0.44	2.28	1.96	2.28	1.28	1.88	1.72	1.5	1.56
MND1	MND1 (ENSG00000121211)	0.44	4.89	4.12	3.71	3.08	3.83	3.62	3.28	3.18
OLMALINC	OLMALINC (ENSG00000235823)	0.44	2.09	1.76	1.99	0.5	1.44	1.45	0.7	0.61
CYP27C1	CYP27C1 (ENSG00000186684)	0.44	-3	-3	-2.06	-3	-3	-3	-2.94	-3
AHCTF1	AHCTF1 (ENSG00000153207)	0.44	5.33	5.42	5.37	4.87	5.22	5.18	4.86	4.99
STAG3L4	STAG3L4 (ENSG00000106610)	0.44	2.35	2.82	3.2	2.73	2.08	2.68	2.5	2.7
PTRH2	PTRH2 (ENSG00000141378)	0.44	6.02	5.92	6.42	6.2	5.76	5.62	6.11	6.19
MRPL18	MRPL18 (ENSG00000112110)	0.44	6.78	6.8	6.79	6.7	6.51	6.58	6.83	6.79
RAP2B	RAP2B (ENSG00000181467)	0.44	3.35	3.43	4.03	3.08	3.34	3.37	3.09	3.12
DIABLO	DIABLO (ENSG00000184047)	0.44	6.2	6.43	6.65	6.37	6.29	6.37	6.22	6.32
HNRNPL	HNRNPL (ENSG00000104824)	0.44	8.72	8.22	8.78	8.75	7.88	7.93	8.64	8.75
MIPEPP3	MIPEPP3 (ENSG00000233325)	0.44	-0.15	-3	-3	-0.45	-3	-3	-3	-1.6
HMGN2P4	HMGN2P4 (ENSG00000249014)	0.44	0.18	-1.32	0.81	-1.79	-0.45	-3	-3	-0.43
PHLDA2	PHLDA2 (ENSG00000181649)	0.44	1.12	-0.47	2.24	1.16	-1.29	-0.54	0.7	1.2
URB1	URB1 (ENSG00000142207)	0.44	3.61	3.23	3.36	3.44	3.16	3.2	3.3	3.46
PDAP1	PDAP1 (ENSG00000106244)	0.44	7.44	6.65	6.3	6.43	6.56	6.46	6.35	6.38
CHTOP	CHTOP (ENSG00000160679)	0.44	5.89	6.1	6.76	6.13	5.9	5.94	6.06	6.13
RBM14	RBM14 (ENSG00000239306)	0.44	5.33	4.82	4.37	4.9	4.64	4.69	4.67	4.7
RTN4IP1	RTN4IP1 (ENSG00000130347)	0.44	3.94	3.93	3.31	3.68	3.52	3.54	3.65	3.5
MCM9	MCM9 (ENSG00000111877)	0.44	2.66	2.67	3.1	2.77	2.35	2.56	2.73	2.83
CMTM2	CMTM2 (ENSG00000140932)	0.44	-3	-3	-2.12	-3	-3	-2.94	-3	-3
GPS2P2	GPS2P2 (ENSG00000230951)	0.44	-3	-3	-3	-2.12	-3	-3	-2.94	-3
SRRM1	SRRM1 (ENSG00000133226)	0.44	6.11	6.11	5.94	6.09	5.92	5.96	5.96	6.11
RPGR	RPGR (ENSG00000156313)	0.44	2.4	2.66	2.47	1.9	2.23	2.46	1.76	1.83
CPSF2	CPSF2 (ENSG00000165934)	0.44	5.47	5.38	4.78	4.94	5.08	5.06	4.75	4.77
HNRNPLP2	HNRNPLP2 (ENSG00000259917)	0.44	-0.45	-0.43	0.15	-0.81	-0.67	-0.97	-1	-0.23
TXLNA	TXLNA (ENSG00000084652)	0.44	4.84	4.95	4.87	4.98	4.86	4.87	4.88	4.89
SRXN1	SRXN1 (ENSG00000271303)	0.44	6.27	6.16	7.16	6.5	6.07	6.05	6.43	6.39
EXOC6	EXOC6 (ENSG00000138190)	0.44	3.36	3.59	4.61	3.8	2.62	3.16	3.69	3.92
POU6F1	POU6F1 (ENSG00000184271)	0.44	0.55	-0.01	0.69	-0.2	0	0.23	-0.34	-0.03
EMC8	EMC8 (ENSG00000131148)	0.44	4.8	4.79	4.25	4.65	4.43	4.56	4.46	4.51
AEBP2	AEBP2 (ENSG00000139154)	0.44	4.89	4.56	4.37	4.5	4.47	4.57	4.3	4.4
PITPNB	PITPNB (ENSG00000180957)	0.44	6.38	6.53	6.44	6.08	6.29	6.37	6.03	6.14
ARHGAP26	ARHGAP26 (ENSG00000145819)	0.44	0.93	2.28	1.04	1.16	0.89	1.4	0.54	0.87
PPM1A	PPM1A (ENSG00000100614)	0.44	4.55	4.7	5.41	4.67	4.41	4.17	4.8	4.75
C1GALT1	C1GALT1 (ENSG00000106392)	0.44	4.33	4.01	4.34	3.65	3.82	3.78	3.7	4.13
FAM3C2	FAM3C2 (ENSG00000174028)	0.44	2.08	1.99	2.56	2.26	1.59	2.38	2.13	1.72
CIAO1	CIAO1 (ENSG00000144021)	0.44	5.87	5.68	5.93	5.97	5.54	5.6	5.87	5.9
NDUFAF4	NDUFAF4 (ENSG00000123545)	0.44	5.95	5.49	4.93	5.27	5.28	5.3	5.11	4.8
SLC35B4	SLC35B4 (ENSG00000205060)	0.44	2.89	2.64	2.82	2.7	2.26	2.31	2.79	2.91
LCLAT1	LCLAT1 (ENSG00000172954)	0.44	3.2	2.96	2.77	3.15	2.93	2.87	2.8	2.99
MAMSTR	MAMSTR (ENSG00000176909)	0.44	-1.89	-3	-2.12	-1.84	-2.47	-3	-2.74	-2.18
IQCA1-AS1	IQCA1-AS1 (ENSG00000232893)	0.44	-3	-3	-2.64	-2.64	-3	-2.84	-3	-2.94
EMP2	EMP2 (ENSG00000213853)	0.43	2.59	0.91	0.66	1.03	0.94	1.09	0.37	0.72
HMGN2	HMGN2 (ENSG00000198830)	0.43	9.75	9.17	9.07	9.22	8.92	8.91	9.25	9.25
NSUN5P2	NSUN5P2 (ENSG00000106133)	0.43	2.57	2.36	1.86	2.08	2.17	2.23	1.69	1.76
TXNRD1	TXNRD1 (ENSG00000198431)	0.43	8.48	8.17	7.47	7.68	7.93	7.8	7.47	7.3
AP3D1	AP3D1 (ENSG00000065000)	0.43	5.1	5.04	4.63	4.64	4.81	4.84	4.48	4.55
RNF219	RNF219 (ENSG00000152193)	0.43	4.18	4.05	3.75	3.7	3.72	3.71	3.85	3.86
PTPN22	PTPN22 (ENSG00000134242)	0.43	-0.15	-1.79	-3	-3	-2.25	-2.64	-3	-3
TMC7	TMC7 (ENSG00000170537)	0.43	0.37	0.29	0.83	0.24	-0.22	0.16	0.41	0.39
EIF2AK2	EIF2AK2 (ENSG00000055332)	0.43	4.58	4.89	5.4	4.65	4.68	4.68	4.55	4.8
SEC14L1P1	SEC14L1P1 (ENSG00000213693)	0.43	-1.64	-1.64	-2.25	-1.36	-2.47	-1.84	-2.25	-1.64
POP7	POP7 (ENSG00000172336)	0.43	4.97	4.4	4.45	4.26	4.42	4.49	4.16	4.2
FOCAD	FOCAD (ENSG00000188352)	0.43	4.94	4.12	3.82	4.18	4.01	3.89	4.15	4
UBR7	UBR7 (ENSG00000012963)	0.43	5.18	4.95	4.61	4.29	4.68	4.64	4.25	4.45
CHL1-AS2	CHL1-AS2 (ENSG00000224318)	0.43	-3	-3	-0.71	-1.74	-3	-3	-3	-2.12
KLF3	KLF3 (ENSG00000109787)	0.43	4.28	4.12	4.26	3.88	4.08	4.04	3.96	4.05
NSMCE2	NSMCE2 (ENSG00000156831)	0.43	5.84	6.04	6.2	5.76	5.86	5.88	5.76	5.88
SSX2IP	SSX2IP (ENSG00000117155)	0.43	3.95	3.3	3.89	3.9	2.91	2.87	3.79	3.95
METAP1	METAP1 (ENSG00000164024)	0.43	5.54	5.4	5.2	5.25	5.32	5.22	5.25	5.25
LEMD1	LEMD1 (ENSG00000186007)	0.43	-3	-3	1.58	-1.51	-3	-3	-3	-1.74
PCDHB10	PCDHB10 (ENSG00000120324)	0.43	-2.25	-3	-3	-3	-3	-2.94	-3	-3
TUBB8P2	TUBB8P2 (ENSG00000218896)	0.43	-3	-2.25	-3	-3	-3	-2.94	-3	-3
NID1	NID1 (ENSG00000116962)	0.43	-0.15	-1.74	-1.84	-2.25	-1.79	-1.69	-2.94	-2.12
IWS1	IWS1 (ENSG00000163166)	0.43	5.03	4.95	5.2	5.24	4.66	4.72	5.17	5.16
NTAN1	NTAN1 (ENSG00000157045)	0.43	5.07	5.11	5.24	4.39	4.81	4.92	4.5	4.59
CCDC94	CCDC94 (ENSG00000105248)	0.43	3.24	3.6	3.29	3.07	3.27	3.31	2.99	2.9
C19orf44	C19orf44 (ENSG00000105072)	0.43	1.64	1.89	2.3	1.91	1.44	1.64	2.09	1.63
PAM16	PAM16 (ENSG00000217930)	0.43	4.4	4.55	4.63	4.33	4.43	4.54	3.67	4.36
RPA4	RPA4 (ENSG00000204086)	0.43	-3	-3	-2.32	-1	-3	-3	-2.64	-2.64
SGK3	SGK3 (ENSG00000104205)	0.43	2.69	2.79	3.29	2.78	2.45	2.7	2.76	2.86
HCG27	HCG27 (ENSG00000206344)	0.43	-2.06	-0.71	-0.22	-2.25	-1.79	-1.89	-2.12	-1.56
BCAP31	BCAP31 (ENSG00000185825)	0.43	7.93	7.66	8.02	7.84	7.5	7.58	7.83	7.93
LDHB	LDHB (ENSG00000111716)	0.43	10.94	10.2	10.35	10.44	10.18	10.17	10.44	10.36
NCAPD2	NCAPD2 (ENSG00000010292)	0.43	7.43	6.46	5.75	6.06	6.19	6.18	5.84	5.96
CENPT	CENPT (ENSG00000102901)	0.43	4.17	4.26	5.05	4.25	4.29	4.37	3.85	4.13
SEC24C	SEC24C (ENSG00000176986)	0.43	6.15	5.93	5.76	5.76	5.9	5.82	5.71	5.65
PODXL	PODXL (ENSG00000128567)	0.43	4.06	3	2.3	2.41	2.67	2.7	2.27	2.4
USP13	USP13 (ENSG00000058056)	0.43	4.13	3.4	3.78	3.96	3.18	3.22	3.84	3.86
KANTR	KANTR (ENSG00000232593)	0.43	0.38	0.99	1.94	0.64	0.92	1.16	-0.34	-0.32
LPGAT1	LPGAT1 (ENSG00000123684)	0.43	3.96	4.04	3.97	3.58	3.7	3.68	3.76	3.9
ITGA7	ITGA7 (ENSG00000135424)	0.43	-1	0.63	0.3	0.39	0.19	-0.04	-1.12	-1.15
BAZ1A	BAZ1A (ENSG00000198604)	0.43	5.43	5.14	4.91	4.33	4.81	4.78	4.57	4.66
FKBP5	FKBP5 (ENSG00000096060)	0.43	4.15	2.97	2.45	3.08	2.7	2.66	2.9	2.93
GNB1L	GNB1L (ENSG00000185838)	0.43	0.89	-0.2	2.21	1.52	0	0.58	0.08	1.12
INPP5F	INPP5F (ENSG00000198825)	0.42	3.03	2.74	2.96	2.04	2.5	2.62	2.23	2.36
HNRNPF	HNRNPF (ENSG00000169813)	0.42	8.1	7.5	7.25	7.42	7.2	7.22	7.44	7.51
LST1	LST1 (ENSG00000204482)	0.42	-3	-0.42	-2	-2.84	-2.06	-3	-3	-3
ATP6V1C1	ATP6V1C1 (ENSG00000155097)	0.42	6.29	6.52	6.73	6.15	6.41	6.33	6.15	6.14
HNRNPUP1	HNRNPUP1 (ENSG00000259051)	0.42	0.77	0.54	-1.25	-3	-1.51	-3	-1.36	-1.4
ZNF611	ZNF611 (ENSG00000213020)	0.42	1.88	2.55	2.72	2.45	2.1	2.64	1.65	1.87
ZNF100	ZNF100 (ENSG00000197020)	0.42	1.69	1	1.63	1.37	0.78	0.53	1.23	1.72
CEACAMP9	CEACAMP9 (ENSG00000230529)	0.42	-3	-2.32	-3	-3	-3	-2.94	-3	-3
AQP3	AQP3 (ENSG00000165272)	0.42	-3	-3	-2.32	-3	-3	-2.94	-3	-3
LINC01561	LINC01561 (ENSG00000177234)	0.42	-3	-2.32	-3	-3	-2.94	-3	-3	-3
TMEM117	TMEM117 (ENSG00000139173)	0.42	1.34	1.46	2.41	1.86	1.25	1.53	1.46	1.7
COLEC10	COLEC10 (ENSG00000184374)	0.42	-3	-3	0.07	-2.47	-2.4	-3	-3	-3
FNBP1	FNBP1 (ENSG00000187239)	0.42	3.85	3.73	3.53	3.8	3.59	3.68	3.69	3.63
FAH	FAH (ENSG00000103876)	0.42	5.48	4.82	4.48	4.56	4.65	4.85	4.35	4.26
TTC39B	TTC39B (ENSG00000155158)	0.42	0.95	0.99	1.68	0.3	0.73	0.93	0.54	0.37
OGG1	OGG1 (ENSG00000114026)	0.42	3.37	3.17	3.56	3.04	3.35	3.37	2.6	2.76
PAFAH2	PAFAH2 (ENSG00000158006)	0.42	2.95	3.12	3.99	3.36	2.79	2.97	3.19	3.3
GJA3	GJA3 (ENSG00000121743)	0.42	-0.38	-1.4	-0.76	-1.6	-1.56	-1.69	-1.12	-1.18
COA7	COA7 (ENSG00000162377)	0.42	5.51	5.43	5.03	5.31	5.15	5.13	5.28	5.24
EPS8	EPS8 (ENSG00000151491)	0.42	2.86	3.12	2.41	2.54	2.63	2.67	2.45	2.45
MT-ATP6	MT-ATP6 (ENSG00000198899)	0.42	11.88	11.99	12.32	12.16	11.95	11.99	12.08	11.82
AP2B1	AP2B1 (ENSG00000006125)	0.42	7.48	7.01	6.94	7.08	7	7.01	7.01	7.05
NEDD1	NEDD1 (ENSG00000139350)	0.42	4.96	5.03	4.69	4.32	4.71	4.67	4.31	4.45
THOC6	THOC6 (ENSG00000131652)	-0.37	4	4.71	4.37	4.37	4.86	4.89	4.23	4.39
FAM46A	FAM46A (ENSG00000112773)	-0.37	1.86	2.22	1.66	1.36	2.37	2.4	1.58	1.88
VSIG8	VSIG8 (ENSG00000243284)	-0.37	-3	-3	-3	-2.06	-3	-3	-1.6	-1.56
ZNF160	ZNF160 (ENSG00000170949)	-0.37	1.97	2.6	3.22	2.93	2.79	2.77	3.01	3.32
RUFY4	RUFY4 (ENSG00000188282)	-0.37	-3	-3	-2.74	-3	-3	-3	-2	-2.84
NPIPA5	NPIPA5 (ENSG00000183793)	-0.37	2.26	2.89	-1.18	-1.18	3.23	2.81	0.04	2.01
TMEM230	TMEM230 (ENSG00000089063)	-0.37	6.71	6.93	6.6	6.81	6.82	6.84	6.83	6.8
C11orf1	C11orf1 (ENSG00000137720)	-0.37	4.42	5	4.88	4.3	5.28	5.12	4.53	4.69
ZBTB12	ZBTB12 (ENSG00000204366)	-0.37	1.9	2.9	3.15	2.33	3.61	3.51	2.48	2.44
RNPEP	RNPEP (ENSG00000176393)	-0.37	5.07	5.09	4.54	5.14	5.02	5.08	5.07	5.19
HSP90B1	HSP90B1 (ENSG00000166598)	-0.37	9.29	9.64	9.38	9.41	9.57	9.6	9.39	9.53
ZNF33B	ZNF33B (ENSG00000196693)	-0.37	1.36	2.72	2.82	3.11	2.7	2.58	3.18	3.15
LINC00449	LINC00449 (ENSG00000203441)	-0.37	-3	-3	-2.47	-2.47	-2.25	-2.25	-2.47	-3
PKIG	PKIG (ENSG00000168734)	-0.37	1.72	2.94	2.91	3.56	2.75	2.95	3.62	3.61
ZNF415	ZNF415 (ENSG00000170954)	-0.37	-3	-1.94	-3	-2.94	-1.36	-1.36	-3	-3
PHYKPL	PHYKPL (ENSG00000175309)	-0.37	2.15	2.94	2.97	3.4	3.08	3	3.06	3.29
TTC38	TTC38 (ENSG00000075234)	-0.37	2.87	3.66	3.52	3.68	3.53	3.52	3.61	3.87
ZNF219	ZNF219 (ENSG00000165804)	-0.37	-0.18	1.6	1.98	0.9	1.78	1.64	1.02	1.82
CEP76	CEP76 (ENSG00000101624)	-0.37	2.82	3.68	3.6	3.66	3.52	3.58	3.64	3.83
VN1R81P	VN1R81P (ENSG00000268357)	-0.37	-2.06	0.08	0.9	0.28	0.04	0.33	0.71	0.42
GUK1	GUK1 (ENSG00000143774)	-0.37	5.94	5.63	5.94	5.69	6.29	6.28	5.55	5.87
TFR2	TFR2 (ENSG00000106327)	-0.37	-1.56	-2.12	-3	-3	-0.25	0.18	-3	-3
QRFP	QRFP (ENSG00000188710)	-0.37	-1.43	-2.64	-3	-1.09	0.7	-2.32	-0.69	-2.32
DUX4L50	DUX4L50 (ENSG00000232815)	-0.37	-3	-1.22	-3	-3	-0.01	-0.51	-3	-3
MRPS14	MRPS14 (ENSG00000120333)	-0.37	3.6	4.03	3.02	3.88	3.98	3.86	3.77	3.75
FAM229B	FAM229B (ENSG00000203778)	-0.37	1.92	1.66	0.08	2.47	1.73	1.91	2.3	2.08
RAB36	RAB36 (ENSG00000100228)	-0.37	-0.06	-0.25	-2.64	-0.92	-0.2	0.33	-0.84	-0.64
CRIP1	CRIP1 (ENSG00000213145)	-0.37	-3	-3	-3	-2.84	-3	-3	-1.89	-3
ZNF192P1	ZNF192P1 (ENSG00000226314)	-0.37	-1.43	1.01	-3	-2.25	0.37	0.66	-1.6	-0.92
PDZD2	PDZD2 (ENSG00000133401)	-0.37	-2.25	-3	-3	-3	-2.56	-2.74	-3	-1.22
TBC1D7	TBC1D7 (ENSG00000145979)	-0.37	3.39	3.83	3.61	3.48	3.58	3.87	3.67	3.67
KCNJ2-AS1	KCNJ2-AS1 (ENSG00000267365)	-0.37	-3	-1.6	-0.86	-0.62	-1.4	-1.03	-1	-0.54
QARS	QARS (ENSG00000172053)	-0.37	7.48	7.52	7.35	7.25	7.59	7.72	7.37	7.35
FAHD1	FAHD1 (ENSG00000180185)	-0.37	3.64	3.64	3.5	4.2	3.77	3.77	4.09	4.09
METTL25	METTL25 (ENSG00000127720)	-0.37	2	2.36	2.93	2.79	2.65	2.74	2.65	2.78
ZNRF2P2	ZNRF2P2 (ENSG00000225264)	-0.37	-1.64	-1.25	0.16	-1.89	-0.84	-0.84	-0.81	-0.58
RFX1	RFX1 (ENSG00000132005)	-0.37	0.32	0.74	0.79	0.97	0.81	0.79	0.74	1.25
EBF1	EBF1 (ENSG00000164330)	-0.37	-3	-2.64	-3	-3	-1.32	-2.84	-3	-3
ZNF33A	ZNF33A (ENSG00000189180)	-0.37	2.41	3.53	3.78	3.49	3.56	3.42	3.64	3.67
KRT18P5	KRT18P5 (ENSG00000236670)	-0.37	-3	-3	-3	-2.25	-1.56	-3	-3	-2.06
MTRNR2L12	MTRNR2L12 (ENSG00000269028)	-0.37	-2.94	-3	-2.4	-3	-3	-2	-3	-2.06
RN7SKP16	RN7SKP16 (ENSG00000222112)	-0.37	-3	-1.29	-3	-3	0.92	-1.12	-3	-3
ITGA9-AS1	ITGA9-AS1 (ENSG00000235257)	-0.37	0.48	0.68	1.09	1.58	0.9	0.55	2.28	2.12
LRCH3	LRCH3 (ENSG00000186001)	-0.37	3.67	4.21	3.58	3.89	3.95	4.03	4.26	3.82
MOB3A	MOB3A (ENSG00000172081)	-0.38	3.17	3.05	1.77	2.66	3.5	3.48	2.68	2.65
PROCA1	PROCA1 (ENSG00000167525)	-0.38	-0.58	-0.45	-0.34	-0.49	0.16	0.32	-1.06	-0.22
FBXW5	FBXW5 (ENSG00000159069)	-0.38	3.32	3.33	3.63	3.21	3.76	3.87	3.21	3.38
TSSC4	TSSC4 (ENSG00000184281)	-0.38	3.1	3.51	3.75	3.58	3.77	3.83	3.38	3.68
FAM162A	FAM162A (ENSG00000114023)	-0.38	6.24	5.82	6.78	6.13	6.78	6.81	6.16	6.32
MYL6P5	MYL6P5 (ENSG00000228118)	-0.38	-2.84	-2.94	-3	-3	-1.64	-3	-3	-3
DNAJC3-AS1	DNAJC3-AS1 (ENSG00000247400)	-0.38	-0.69	-0.38	-0.17	-0.4	-0.64	0.11	-0.22	-0.07
PDE5A	PDE5A (ENSG00000138735)	-0.38	0.62	0.85	-0.01	0.41	1.35	1.5	0.44	0.14
CCS	CCS (ENSG00000173992)	-0.38	3.92	4.19	4.78	4.57	4.6	4.58	4.38	4.65
PITPNA-AS1	PITPNA-AS1 (ENSG00000236618)	-0.38	3.55	4.2	2.85	2.97	4.19	4.14	3.58	3.26
CADPS	CADPS (ENSG00000163618)	-0.38	-3	-2.84	-3	-3	-3	-1.84	-3	-3
STX18	STX18 (ENSG00000168818)	-0.38	3.49	3.74	3.46	3.73	3.38	3.69	3.82	4.37
RWDD2B	RWDD2B (ENSG00000156253)	-0.38	4.34	4.68	4.23	4.76	4.38	4.52	4.94	5.06
CEMIP	CEMIP (ENSG00000103888)	-0.38	-3	-3	-3	-2.74	-3	-1.12	-3	-3
CDK13	CDK13 (ENSG00000065883)	-0.38	4.01	4.34	3.78	3.93	4.21	4.17	4.08	4.06
IQUB	IQUB (ENSG00000164675)	-0.38	-3	-2.06	-0.29	-2	-1.47	-1.56	-0.84	-1.29
COL7A1	COL7A1 (ENSG00000114270)	-0.38	-0.97	1.88	2.64	2.23	2.27	1.96	1.95	2.48
MEI4	MEI4 (ENSG00000269964)	-0.38	-3	-2.4	-3	-3	-2.06	-2.06	-3	-3
ACOT1	ACOT1 (ENSG00000184227)	-0.38	1.52	1.77	1.66	2.2	1.93	1.7	2.05	2.31
EPC2	EPC2 (ENSG00000135999)	-0.38	3.33	3.66	3.26	3.35	3.53	3.52	3.37	3.58
CATSPER2P1	CATSPER2P1 (ENSG00000205771)	-0.38	0.18	0.98	-0.25	0.38	1.63	1.49	0.03	0.19
TBCEL	TBCEL (ENSG00000154114)	-0.38	2.38	3.36	3.29	3.01	3.24	3.11	3.22	3.22
PTGES3P3	PTGES3P3 (ENSG00000229204)	-0.38	-3	-0.84	-1.56	-3	-2.84	-0.81	-1.29	-0.01
KLHL17	KLHL17 (ENSG00000187961)	-0.38	1.78	2.46	2.39	1.87	3.05	3.28	1.46	2.47
ADH5P4	ADH5P4 (ENSG00000233859)	-0.38	-1.94	-2.18	-1.74	-2.56	-2.4	-1.56	-2	-1.06
PET117	PET117 (ENSG00000232838)	-0.38	4.53	4.54	2.9	4.27	4.38	4.28	4.47	4.43
HDAC3	HDAC3 (ENSG00000171720)	-0.38	6.06	5.96	5.96	6.1	6.1	6	6.03	6.2
LXN	LXN (ENSG00000079257)	-0.38	3.75	3.49	2.08	2.92	4.3	4.5	2.81	3.06
TRBV11-1	TRBV11-1 (ENSG00000211720)	-0.38	-1.94	-3	-3	-3	-1.89	-0.32	-3	-3
UNGP3	UNGP3 (ENSG00000270343)	-0.38	-3	-3	-3	-1.51	-3	-3	-1.06	-0.14
ARMCX3	ARMCX3 (ENSG00000102401)	-0.38	4.45	5.03	4.79	4.79	4.99	4.89	4.82	4.85
ZNF512B	ZNF512B (ENSG00000196700)	-0.38	2.89	3.17	2.14	3.2	3.39	3.42	2.84	2.95
RFPL3S	RFPL3S (ENSG00000205853)	-0.38	-3	-1.25	-3	-2.56	-1.06	-0.97	-3	-2.06
ITGAL	ITGAL (ENSG00000005844)	-0.38	-3	-3	-2.84	-3	-3	-3	-3	-1.79
CTPS2	CTPS2 (ENSG00000047230)	-0.38	4.41	5	3.52	4.13	4.84	5.15	4.26	4.38
ZNF487	ZNF487 (ENSG00000243660)	-0.38	1.16	0.85	1.97	1.88	1.45	1.6	2.15	2
C19orf38	C19orf38 (ENSG00000214212)	-0.38	-3	-2.64	-0.74	-1.74	-1.69	-2.56	-0.32	-0.32
SH3BGRL	SH3BGRL (ENSG00000131171)	-0.38	5.57	5.38	5.53	5.75	5.46	5.52	5.92	5.98
FTLP3	FTLP3 (ENSG00000226608)	-0.38	1.5	1.16	1.08	-0.27	1.41	1.17	1.13	1.15
UBA52	UBA52 (ENSG00000221983)	-0.38	10.55	10.32	10.39	10.74	10.49	10.47	10.8	10.8
ACADS	ACADS (ENSG00000122971)	-0.38	0.38	0.54	1.58	1.57	0.93	1.36	1.55	1.76
TAS2R19	TAS2R19 (ENSG00000212124)	-0.38	-3	-2.64	-3	-3	-2.56	-2.25	-3	-3
ZGPAT	ZGPAT (ENSG00000197114)	-0.38	1.88	2.65	1.41	2.34	2.86	2.91	1.93	2.17
GNPTG	GNPTG (ENSG00000090581)	-0.38	3.7	4.11	4.99	4.6	4.67	4.57	4.49	4.66
TRIM66	TRIM66 (ENSG00000166436)	-0.38	-0.07	0.75	0.23	1.14	0.77	0.71	0.6	1.19
CPB2-AS1	CPB2-AS1 (ENSG00000235903)	-0.38	-2.84	-3	-2.12	-2.64	-3	-1.6	-2.12	-2.4
DICER1-AS1	DICER1-AS1 (ENSG00000235706)	-0.38	0.34	1.32	1.7	1.03	1.88	1.86	1.01	1.2
EIF2D	EIF2D (ENSG00000143486)	-0.38	5.35	5.92	5.04	5.54	5.86	5.89	5.49	5.51
BDH2	BDH2 (ENSG00000164039)	-0.38	3.6	4.43	3.6	3.63	4.62	4.52	3.74	3.75
CDRT15	CDRT15 (ENSG00000223510)	-0.38	-3	-2	-3	-3	-1.51	-1.29	-3	-3
CADM2	CADM2 (ENSG00000175161)	-0.38	-3	-2.18	-3	-3	-1.94	-1.36	-3	-3
SIDT2	SIDT2 (ENSG00000149577)	-0.39	1.57	1.75	1.45	1.61	1.86	2	1.43	1.66
TBC1D20	TBC1D20 (ENSG00000125875)	-0.39	3.62	4.17	3.58	3.69	4.17	4.18	3.69	3.82
LINC00184	LINC00184 (ENSG00000224939)	-0.39	-2.84	-2.06	-3	-3	-1.4	-1.36	-3	-3
RXRA	RXRA (ENSG00000186350)	-0.39	1.29	1.76	2.28	1.99	1.99	2.15	1.94	2.03
ZNF354B	ZNF354B (ENSG00000178338)	-0.39	1.52	2.09	-0.64	1.68	1.74	2.09	1.43	1.72
LINC00926	LINC00926 (ENSG00000247982)	-0.39	-3	-2.74	-3	-3	-2.25	-2.74	-3	-3
PTPRQ	PTPRQ (ENSG00000139304)	-0.39	-3	-2.56	-3	-3	-2.56	-1.74	-3	-3
UBE2FP1	UBE2FP1 (ENSG00000224080)	-0.39	1.77	1.68	0.49	1.82	1.68	1.86	1.99	1.52
ATP5G2P4	ATP5G2P4 (ENSG00000228847)	-0.39	-3	-2.74	-2.12	-3	-2.4	-1.4	-3	-2.4
SCNN1G	SCNN1G (ENSG00000166828)	-0.39	-3	-2.94	-3	-3	-2.56	-3	-3	-3
MYCBP2-AS1	MYCBP2-AS1 (ENSG00000236051)	-0.39	-3	-3	-2.94	-3	-2.56	-3	-3	-3
GPR132	GPR132 (ENSG00000183484)	-0.39	-3	-2.94	-3	-3	-2.56	-3	-3	-3
PPIEL	PPIEL (ENSG00000243970)	-0.39	-3	-3	-3	-2.94	-3	-2.56	-3	-3
PTGR2	PTGR2 (ENSG00000140043)	-0.39	3.38	3.67	2.9	3.84	3.64	3.65	3.5	3.88
PTPN2	PTPN2 (ENSG00000175354)	-0.39	5.16	6.16	5.62	5.64	6.03	5.99	5.69	5.75
BBS5	BBS5 (ENSG00000163093)	-0.39	2.43	2.9	0.11	1.69	2.68	2.8	1.87	2.32
RHOQ	RHOQ (ENSG00000119729)	-0.39	4.68	5.28	4.84	4.8	5.3	5.31	4.8	4.99
C6orf48	C6orf48 (ENSG00000204387)	-0.39	7.41	8.67	6.51	7.65	8.43	8.57	7.69	7.67
NUDT6	NUDT6 (ENSG00000170917)	-0.39	1.68	1.95	2.04	2.43	2.05	2.06	2.46	2.35
PLAGL2	PLAGL2 (ENSG00000126003)	-0.39	2.63	3.18	0.74	3.57	2.84	2.9	3.42	3.42
TOM1L2	TOM1L2 (ENSG00000175662)	-0.39	3.97	3.75	3.9	4.36	3.86	3.83	4.75	4.75
TMEM219	TMEM219 (ENSG00000149932)	-0.39	5.67	5.79	5.74	5.45	5.98	6.07	5.51	5.72
PSMB8	PSMB8 (ENSG00000204264)	-0.39	5.09	5.32	4.88	4.52	5.36	5.51	4.9	5.01
SOX15	SOX15 (ENSG00000129194)	-0.39	-2.64	-0.25	-2.94	-2.64	-0.69	-0.76	-2.47	-1.32
FAM66D	FAM66D (ENSG00000255052)	-0.39	-3	-2.18	-3	-1.47	-1.6	-1.84	-1.69	-2.64
DHRSX-IT1	DHRSX-IT1 (ENSG00000223571)	-0.39	-3	-3	-2.4	-1.4	-2.56	-2.64	-0.6	-1.25
IFT81	IFT81 (ENSG00000122970)	-0.39	3.48	3.76	2.47	3.02	3.83	3.9	3.2	3.27
TIGD2	TIGD2 (ENSG00000180346)	-0.39	2.41	2.84	1.78	2.22	2.39	2.51	2.6	2.6
TLN2	TLN2 (ENSG00000171914)	-0.39	2.64	3.36	2.29	3.27	3.35	3.53	2.98	2.94
MXI1	MXI1 (ENSG00000119950)	-0.39	3.59	4.04	4.39	3.71	4.88	4.81	3.69	3.88
ASMTL-AS1	ASMTL-AS1 (ENSG00000236017)	-0.39	-1.74	-0.38	-1.74	0.36	1.03	-0.04	-1.64	0.62
CTAGE7P	CTAGE7P (ENSG00000233122)	-0.39	-3	-2.4	-2.32	-2.25	-1.79	-2.12	-2.64	-2.32
LINC01341	LINC01341 (ENSG00000227953)	-0.39	-1.6	0.8	-1.15	-0.01	1.08	1.04	-0.54	-0.45
WDPCP	WDPCP (ENSG00000143951)	-0.39	0.85	1.55	0.93	0.23	1.82	1.77	0.62	1.08
PLAGL1	PLAGL1 (ENSG00000118495)	-0.39	3.66	2.57	2.4	3.8	3.44	3.28	3.44	3.58
C1orf159	C1orf159 (ENSG00000131591)	-0.39	0.26	-0.32	0.82	1.34	0.21	1.14	1.2	1.56
RAB11FIP1P1	RAB11FIP1P1 (ENSG00000228492)	-0.39	-1.32	-0.56	-0.18	-0.06	-0.23	-0.34	-0.4	0.04
ACADVL	ACADVL (ENSG00000072778)	-0.39	6.65	7.58	6.81	7.1	7.42	7.49	6.95	7.29
TCIRG1	TCIRG1 (ENSG00000110719)	-0.39	1.62	1.86	2.46	1.63	2.57	2.82	1.55	2.13
WISP1	WISP1 (ENSG00000104415)	-0.39	-2.74	-3	-3	-3	-2.64	-2.47	-3	-3
FAM63A	FAM63A (ENSG00000143409)	-0.39	0.78	0.89	0.83	1.14	0.99	0.93	0.96	1.28
WAC-AS1	WAC-AS1 (ENSG00000254635)	-0.39	2.95	2.8	1.97	2.55	2.98	2.86	2.62	2.74
SEPT10P1	SEPT10P1 (ENSG00000253541)	-0.39	-2.4	-2.64	-2.64	-3	-3	-2.25	-2.25	-2.18
WASH7P	WASH7P (ENSG00000227232)	-0.39	2.3	2.55	2.26	2.19	2.65	2.75	2	2.69
RNU2-59P	RNU2-59P (ENSG00000222414)	-0.39	4.56	2.84	4.16	3.78	3.41	4.68	4.39	5.17
PAPPA-AS1	PAPPA-AS1 (ENSG00000256040)	-0.39	-1.79	-2.18	-2.18	-2.25	-2.32	-1.84	-1.6	-1.84
ZNF137P	ZNF137P (ENSG00000123870)	-0.39	0.03	0.92	1.59	1.02	1.05	1.4	1.31	1.08
PSMD6-AS2	PSMD6-AS2 (ENSG00000239653)	-0.39	-2.74	-1	-2.32	-3	-0.84	-0.62	-3	-1.51
TAAR9	TAAR9 (ENSG00000237110)	-0.39	-3	-3	-2.4	-2.12	-3	-3	-0.97	-1.03
TRAK2	TRAK2 (ENSG00000115993)	-0.39	3.82	3.97	3.34	3.5	3.92	3.93	3.67	3.76
TREX2	TREX2 (ENSG00000183479)	-0.39	-1.79	-2.84	-2.64	-3	-2.56	-0.94	-3	-1.4
PLCH2	PLCH2 (ENSG00000149527)	-0.39	-3	-1.43	-3	-3	-0.54	-0.32	-3	-3
WDR60	WDR60 (ENSG00000126870)	-0.39	2.47	2.27	1.6	1.54	2.94	2.91	1.82	1.92
SAR1A	SAR1A (ENSG00000079332)	-0.39	6.18	6.24	6.12	6.36	6.2	6.22	6.37	6.44
MPLKIP	MPLKIP (ENSG00000168303)	-0.39	1.85	1.91	1.07	2.11	1.95	1.91	1.93	1.9
ZNF671	ZNF671 (ENSG00000083814)	-0.39	0.23	1.97	-0.17	0.93	1.57	1.48	1.06	0.86
FAAP100	FAAP100 (ENSG00000185504)	-0.4	2.07	1.72	1.16	1.35	2.25	2.28	1.32	1.81
ZMYM6	ZMYM6 (ENSG00000163867)	-0.4	2.54	3.08	2	2.69	2.82	2.78	2.65	3.03
UBXN6	UBXN6 (ENSG00000167671)	-0.4	3.55	3.62	3.79	3.73	4.04	4.32	3.52	3.59
ARL6IP4	ARL6IP4 (ENSG00000182196)	-0.4	6.38	6.1	5.65	6.67	6.3	6.33	6.54	6.53
RSPRY1	RSPRY1 (ENSG00000159579)	-0.4	4.71	5.11	4.26	5.21	4.92	4.98	5.11	5.1
TIMM21	TIMM21 (ENSG00000075336)	-0.4	4.96	5.57	3.88	4.85	5.31	5.36	4.9	5.12
SEPSECS	SEPSECS (ENSG00000109618)	-0.4	-0.51	0.9	0.24	1.36	0.83	0.46	1.22	1.47
SLC25A5P5	SLC25A5P5 (ENSG00000226421)	-0.4	-3	-3	-3	-2.56	-3	-3	-2.56	-1.6
RASAL2	RASAL2 (ENSG00000075391)	-0.4	3.42	4.59	3.68	3.98	4.54	4.4	3.91	4.09
SLC25A34	SLC25A34 (ENSG00000162461)	-0.4	-3	-1.89	-1.84	-0.84	-1.56	-2.18	-0.49	-0.67
CSAG1	CSAG1 (ENSG00000198930)	-0.4	2.99	4.99	4.66	5.11	4.65	4.76	5.16	5.18
DDOST	DDOST (ENSG00000244038)	-0.4	7.82	7.94	8.17	8.31	8.07	8.07	8.33	8.4
CHSY1	CHSY1 (ENSG00000131873)	-0.4	3.32	3.7	3.8	3.7	3.73	3.52	3.9	4.1
ZNF350	ZNF350 (ENSG00000256683)	-0.4	1.77	2.07	2.17	2.12	2.09	1.95	2.34	2.33
LCE2A	LCE2A (ENSG00000187173)	-0.4	-3	-1.74	-3	-3	-0.18	-1.36	-3	-3
PRMT9	PRMT9 (ENSG00000164169)	-0.4	2.1	2.83	2.7	2.98	2.67	2.76	2.99	3.17
LINC01013	LINC01013 (ENSG00000228495)	-0.4	-3	-2	-3	-3	-0.86	-1.64	-3	-3
ATXN10	ATXN10 (ENSG00000130638)	-0.4	6.06	6.23	6.35	6.61	6.36	6.35	6.57	6.52
ZNF197	ZNF197 (ENSG00000186448)	-0.4	1.56	2.74	1.12	2.23	2.54	2.56	2.05	2.08
ZNF815P	ZNF815P (ENSG00000235944)	-0.4	-0.62	0.46	0.24	0.01	0.1	0.6	0.25	0.24
RBM6	RBM6 (ENSG00000004534)	-0.4	4.98	5.33	4.76	5.03	5.1	5.18	5.08	5.25
MESP1	MESP1 (ENSG00000166823)	-0.4	-1.89	-3	-3	-3	-1.69	-0.09	-3	-3
ZNF725P	ZNF725P (ENSG00000268100)	-0.4	-3	-2.06	-3	-3	-1.64	-1.12	-3	-3
ANKRD20A19P	ANKRD20A19P (ENSG00000196593)	-0.4	-3	-3	-2.94	-2.06	-3	-3	-0.92	-1.69
FEM1B	FEM1B (ENSG00000169018)	-0.4	2.83	3.33	2.38	3.36	3.22	3.13	3.17	3.2
KLHL22	KLHL22 (ENSG00000099910)	-0.4	2.6	2.77	2.54	2.88	2.83	2.58	2.9	3.03
ZNF319	ZNF319 (ENSG00000166188)	-0.4	1.18	1.94	-0.07	1.19	1.76	1.99	1.18	1.27
PDE4DIPP1	PDE4DIPP1 (ENSG00000229828)	-0.4	-3	-2.94	-3	-3	-2.47	-3	-3	-3
SEMA6D	SEMA6D (ENSG00000137872)	-0.4	-2.94	-3	-3	-3	-2.47	-3	-3	-3
C8orf46	C8orf46 (ENSG00000169085)	-0.4	-0.97	2.13	-2.25	-0.62	2.28	1.85	-0.56	-0.06
RPL6P27	RPL6P27 (ENSG00000235552)	-0.4	4.28	4.22	3.63	3.56	4.13	4.03	4.06	4.22
CEACAM5	CEACAM5 (ENSG00000105388)	-0.4	-3	-3	-2.74	-3	-3	-3	-3	-0.54
OR10Y1P	OR10Y1P (ENSG00000254403)	-0.4	-3	-1.47	-3	-3	-0.45	-0.38	-3	-3
IQCJ-SCHIP1	IQCJ-SCHIP1 (ENSG00000250588)	-0.4	4.58	4.29	4.31	5.19	4.54	4.61	5.28	5.28
KIAA0195	KIAA0195 (ENSG00000177728)	-0.4	3.98	4.59	4.35	4.52	4.58	4.77	4.33	4.5
INSL4	INSL4 (ENSG00000120211)	-0.4	-3	-3	-2.94	-2.56	-3	-3	-2.47	-1.64
CLUAP1	CLUAP1 (ENSG00000103351)	-0.4	3.98	4.18	2.88	4.21	4.14	3.93	4.23	4.19
RHOA-IT1	RHOA-IT1 (ENSG00000235908)	-0.41	-3	-3	-3	-2.84	-3	-1.43	-3	-3
FTCD	FTCD (ENSG00000160282)	-0.41	-3	-3	-1.36	-3	-3	-1.4	-2.47	-0.01
GHDC	GHDC (ENSG00000167925)	-0.41	2.65	3.23	3.55	3.54	3.57	3.29	3.42	3.65
ARNT	ARNT (ENSG00000143437)	-0.41	3.66	4.42	4.35	4.15	4.43	4.37	4.2	4.3
B3GNT4	B3GNT4 (ENSG00000176383)	-0.41	-2.47	-0.64	-0.42	0.41	-0.32	-0.74	0.23	0.72
PPM1H	PPM1H (ENSG00000111110)	-0.41	1.58	2.31	1.35	2.02	2.7	2.5	1.79	1.77
ZNF654	ZNF654 (ENSG00000175105)	-0.41	1.8	2.35	1.61	1.48	2.24	2.22	1.77	2
PLK2	PLK2 (ENSG00000145632)	-0.41	6.8	7.7	6.49	7.23	7.54	7.55	7.12	7.21
SPIB	SPIB (ENSG00000269404)	-0.41	-3	-3	-2.25	-2.47	-1.89	-2.32	-3	-2.12
OGFRL1	OGFRL1 (ENSG00000119900)	-0.41	2.6	2.85	0.5	2.94	2.54	2.73	2.81	3.02
HOXD-AS2	HOXD-AS2 (ENSG00000237380)	-0.41	0.06	-0.1	-0.97	0.24	0.01	0.19	0.4	-0.14
ATP8B1	ATP8B1 (ENSG00000081923)	-0.41	0.53	2.11	1.36	3	1.82	1.95	2.93	3.1
MTERF4	MTERF4 (ENSG00000122085)	-0.41	4.67	4.79	4.52	5.07	4.93	4.89	5.02	4.76
NDST1	NDST1 (ENSG00000070614)	-0.41	5.03	5.29	4.84	5.54	5.14	5.22	5.57	5.76
NENF	NENF (ENSG00000117691)	-0.41	5.52	5.48	5.01	5.33	5.56	5.63	5.37	5.38
RNF39	RNF39 (ENSG00000204618)	-0.41	-2.12	-2.06	-0.74	-0.81	-0.56	-1.89	-0.47	-0.42
CCR1	CCR1 (ENSG00000163823)	-0.41	-2.4	0.59	0.82	0.11	0.6	0.38	0.28	0.53
MYL12AP1	MYL12AP1 (ENSG00000254387)	-0.41	-3	-3	-3	-2.74	-0.4	-3	-3	-3
RPL18A	RPL18A (ENSG00000105640)	-0.41	11.04	10.76	11.07	10.9	11.21	11.24	10.9	10.94
FYTTD1	FYTTD1 (ENSG00000122068)	-0.41	4.32	4.97	3.92	4.9	4.72	4.62	4.86	4.96
CCDC24	CCDC24 (ENSG00000159214)	-0.41	-1.79	-0.43	1.5	1.65	0.73	0.52	1.59	1.84
FAT3	FAT3 (ENSG00000165323)	-0.41	-3	-1.22	-3	-0.81	-2.64	-1.15	-0.62	0.31
ZBTB17	ZBTB17 (ENSG00000116809)	-0.41	2.52	3.55	2.48	2.85	3.95	3.7	2.7	2.85
GOLGA5	GOLGA5 (ENSG00000066455)	-0.41	4.55	5.02	5.11	5.08	5	4.92	5.29	5.31
PFKL	PFKL (ENSG00000141959)	-0.41	4.56	3.81	4.85	4.85	4.72	4.84	4.65	4.81
TBC1D19	TBC1D19 (ENSG00000109680)	-0.41	-0.43	-0.6	-1.22	0.5	-0.25	-0.84	0.93	1.1
LDHAP2	LDHAP2 (ENSG00000235674)	-0.41	-3	-3	-2.56	-3	-3	-2.32	-3	-2.12
C11orf58	C11orf58 (ENSG00000110696)	-0.41	8.04	8.35	7.46	8	8.17	8.2	8.09	8.08
NPPB	NPPB (ENSG00000120937)	-0.41	-3	-3	-3	-2	-1.74	-3	-2.94	-0.69
DOCK11	DOCK11 (ENSG00000147251)	-0.41	0.07	-0.27	-1.56	-0.29	-0.42	-0.12	-0.12	0.21
IL15	IL15 (ENSG00000164136)	-0.41	-1.47	-1.06	0.3	0.31	-0.45	-0.12	0.37	0.56
HEXB	HEXB (ENSG00000049860)	-0.41	7.01	7.34	7.21	7.53	7.23	7.23	7.65	7.84
SMAD6	SMAD6 (ENSG00000137834)	-0.41	-2.74	-2.32	0.04	1.55	-0.58	-0.58	1.61	1.39
ANAPC4	ANAPC4 (ENSG00000053900)	-0.41	3.74	3.78	3.74	3.7	3.81	3.77	3.67	3.96
MYO1A	MYO1A (ENSG00000166866)	-0.41	-3	-3	-3	-2.74	-3	-3	-1.43	-2.84
COLQ	COLQ (ENSG00000206561)	-0.41	-2.74	-1.64	-0.89	-1.03	-1.43	-1.25	-1.09	-0.38
ZNF789	ZNF789 (ENSG00000198556)	-0.41	1.38	1.4	0.19	1.78	1.53	1.41	1.53	1.53
RPS19P1	RPS19P1 (ENSG00000214612)	-0.41	-0.64	-3	-1.22	-1.25	-1.47	-0.18	-1.47	0.04
PGM1	PGM1 (ENSG00000079739)	-0.41	5.01	4.03	3.41	4.09	4.87	4.9	4.15	4.33
CAPS	CAPS (ENSG00000105519)	-0.41	-1.84	0.31	0.65	-0.22	0.83	0.82	0.19	-0.25
RPS3AP5	RPS3AP5 (ENSG00000178429)	-0.41	-0.51	-0.23	-0.14	-1.79	0.08	-0.03	-0.76	-0.07
CGB5	CGB5 (ENSG00000189052)	-0.41	-3	-2.32	-3	-3	-1.89	-1.74	-3	-3
VPS54	VPS54 (ENSG00000143952)	-0.41	3.28	3.51	2.43	3.87	3.34	3.45	3.91	3.91
WDFY3-AS2	WDFY3-AS2 (ENSG00000180769)	-0.41	-1.25	-0.36	-0.22	-0.45	-0.43	-0.04	-0.23	-0.47
TMEM179B	TMEM179B (ENSG00000185475)	-0.41	3.85	4.03	4.1	4.4	4.12	4.31	4.35	4.17
[truncated: 1,387 more rows]
